# Supplementary material for: Nickel-catalyzed decarboxylative cross-coupling of indole-3-acetic acids with aryl bromides by convergent paired electrolysis
Source: Royal Society of Chemistry journal article supplement (doi:10.1039/d2cc02641d), 2022-01-01
Supplement: d2cc02641d1.pdf [file d2cc02641d1.pdf]

## Supporting Information

### Nickel-Catalyzed Decarboxylative Cross-Coupling of Indole-3- acetic Acids with Aryl Bromides by Convergent Paired Electrolysis

Zhen-Hua Wang, Lei Wei, Ke-Jin Jiao, Cong Ma, and Tian-Sheng Mei\*

State Key Laboratory of Organometallic Chemistry, Center for Excellence in Molecular  
Synthesis, Shanghai Institute of Organic Chemistry, Chinese Academy of Science, 345  
Lingling Lu, Shanghai 200032, China

\*E-mail: mei7900@sioc.ac.cn

## Table of Contents

|                                                                                                  |           |
|--------------------------------------------------------------------------------------------------|-----------|
| <b>1. General Information.....</b>                                                               | <b>2</b>  |
| <b>2. Optimization Details.....</b>                                                              | <b>3</b>  |
| <b>3. On/Off experiment.....</b>                                                                 | <b>6</b>  |
| <b>4. Cyclic Voltammetry.....</b>                                                                | <b>7</b>  |
| <b>5. Potentials of Anode and Cathode During the Electrolysis..</b>                              | <b>10</b> |
| <b>6. General Procedure and Characterization Data.....</b>                                       | <b>11</b> |
| <b>7. Unsuccessful substrates.....</b>                                                           | <b>31</b> |
| <b>8. Crystallographic Data of Compound 3o.....</b>                                              | <b>32</b> |
| <b>9. Crystallographic Data of Compound 3ae.....</b>                                             | <b>43</b> |
| <b>10. References.....</b>                                                                       | <b>82</b> |
| <b>11. <sup>1</sup>H NMR, <sup>13</sup>C{<sup>1</sup>H} NMR, <sup>19</sup>F NMR Spectra.....</b> | <b>83</b> |

## 1. General Information

Commercially available materials were used without further purification. Column chromatography was performed using either 100-200 Mesh or 300-400 Mesh silica gel. Visualization of spots on TLC plate was accomplished with UV light (254 nm) and staining over I<sub>2</sub> chamber.

All commercial reagents were purchased from TCI, Alfa-aesar, Adamas-beta, J&K, Bide chemistry and Energy Chemical of the highest purity grade. They were used without further purification unless specified. Nickel(II) bromide ethylene, glycol dimethyl ether was purchased from Strem chemicals and was used as received. DMA (99.8%, SuperDry) was purchased from J&K and was used without further purification. <sup>1</sup>H NMR and <sup>13</sup>C NMR spectra were recorded on Agilent AV 400, Bruker 400, Varian Inova 400 (400 MHz and 100 MHz, respectively). <sup>19</sup>F NMR spectra were recorded on Agilent AV 400, Varian Inova 400 (376 MHz) instrument. The peaks were internally referenced to TMS (0.00 ppm) or residual undeuterated solvent signal. The following abbreviations were used to explain multiplicities: s = singlet, d = doublet, t = triplet, q = quartet, m = multiplet, and br = broad. Infrared spectra were obtained on a Bio-Rad FTS-185 instrument. High resolution mass spectra were recorded at the Center for Mass Spectrometry, Shanghai Institute of Organic Chemistry. Analytical and spectral data of all those known compounds are exactly matching with the reported values.

## 2. Optimization Details

Table S1. Screening of solvent.<sup>a</sup>

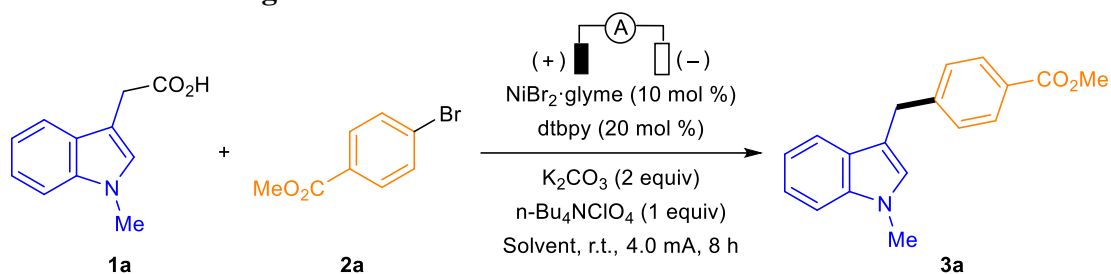

| Entry | Solvent | Yield (%) <sup>b</sup> |
|-------|---------|------------------------|
| 1     | DMAc    | 30                     |
| 2     | DMF     | 18                     |
| 3     | MeCN    | 0                      |
| 4     | DMSO    | 0                      |

<sup>a</sup> Reaction conditions: anode (Pt), cathode (Ni foam), **1a** (0.3 mmol, 1 equiv), **2a** (0.60 mmol, 2 equiv),  $\text{NiBr}_2 \cdot \text{glyme}$  (10 mol %),  $\text{dtbpy}$  (20 mol %),  $n\text{-Bu}_4\text{NClO}_4$  (0.3 mmol, 1 equiv),  $\text{K}_2\text{CO}_3$  (0.6 mmol, 2 equiv) in solvent (3 mL) at room temperature, 4 mA for 8 h. <sup>b</sup> Yields were determined by  $^1\text{H}$  NMR using  $\text{CH}_2\text{Br}_2$  as an internal standard.

**Table S2. Screening of anode.<sup>a</sup>**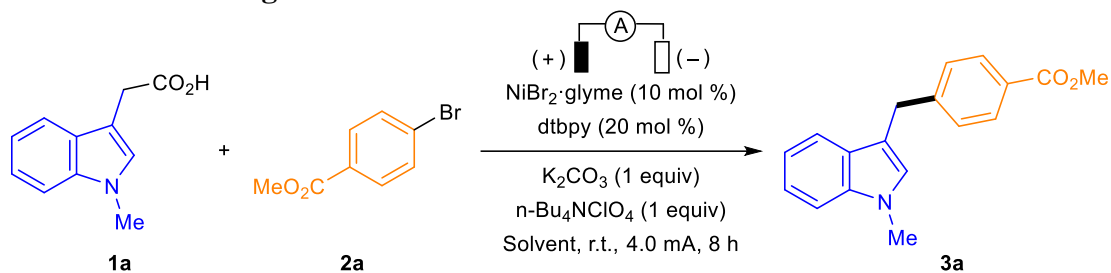

| Entry | Anode | Solvent | Yield (%) <sup>b</sup> |
|-------|-------|---------|------------------------|
| 1     | Pt    | DMAc    | 10                     |
| 2     | Pt    | DMF     | 37                     |
| 3     | C     | DMAc    | 16                     |
| 4     | C     | DMF     | 15                     |

<sup>a</sup> Reaction conditions: cathode (Ni foam), **1a** (0.3 mmol, 1 equiv), **2a** (0.60 mmol, 2 equiv), NiBr<sub>2</sub>·glyme (10 mol %), dtbpy (20 mol %), *n*-Bu<sub>4</sub>NClO<sub>4</sub> (0.3 mmol, 1 equiv), K<sub>2</sub>CO<sub>3</sub> (0.3 mmol, 1 equiv) in solvent (3 mL) at room temperature, 4 mA for 8 h. <sup>b</sup> Yields were determined by <sup>1</sup>H NMR using CH<sub>2</sub>Br<sub>2</sub> as an internal standard.

**Table S3. Screening of electrolyte.<sup>a</sup>**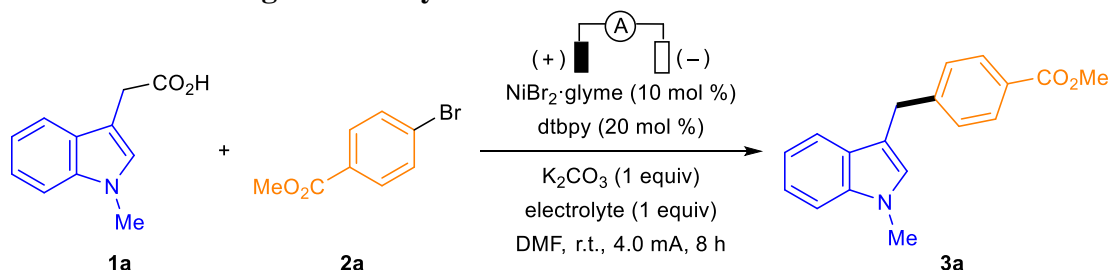

| Entry | Electrolyte                                 | Yield (%) <sup>b</sup> |
|-------|---------------------------------------------|------------------------|
| 1     | <i>n</i> -Bu <sub>4</sub> NClO <sub>4</sub> | 37                     |
| 2     | <i>n</i> -Bu <sub>4</sub> NBr               | 33                     |
| 3     | <i>n</i> -Bu <sub>4</sub> NBF <sub>4</sub>  | 52                     |
| 4     | [lutH]ClO <sub>4</sub>                      | 55                     |

<sup>a</sup> Reaction conditions: anode (Pt), cathode (Ni foam), **1a** (0.3 mmol, 1 equiv), **2a** (0.60 mmol, 2 equiv), NiBr<sub>2</sub>·glyme (10 mol %), dtbpy (20 mol %), electrolyte (0.3 mmol, 1 equiv), K<sub>2</sub>CO<sub>3</sub> (0.3 mmol, 1 equiv) in solvent (3 mL) at room temperature, 4 mA for 8 h. <sup>b</sup> Yields were determined by <sup>1</sup>H NMR using CH<sub>2</sub>Br<sub>2</sub> as an internal standard.

**Table S4. Screening of base.<sup>a</sup>**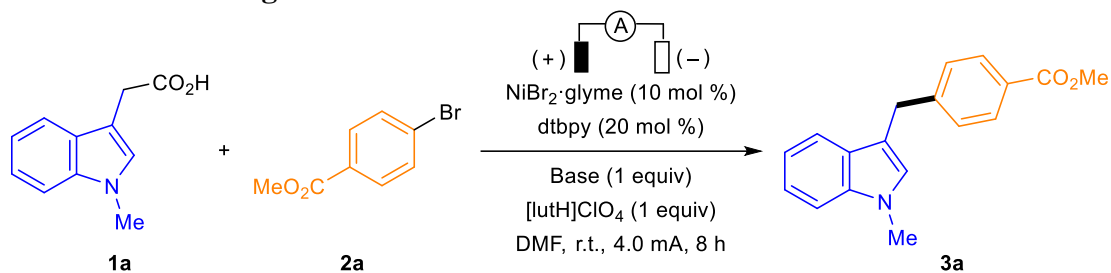

| Entry | Base                             | Yield (%) <sup>b</sup> |
|-------|----------------------------------|------------------------|
| 1     | K <sub>2</sub> CO <sub>3</sub>   | 55                     |
| 2     | 2,6-lutidine                     | 14                     |
| 3     | 2,4,6-collidine                  | 15                     |
| 4     | ( <i>t</i> -Bu)( <i>i</i> -Pr)NH | 48                     |
| 5     | DBU                              | 60                     |
| 6     | no base                          | 0                      |

<sup>a</sup> Reaction conditions: anode (Pt), cathode (Ni foam), **1a** (0.3 mmol, 1 equiv), **2a** (0.60 mmol, 2 equiv), NiBr<sub>2</sub> glyme (10 mol %), dtbpy (20 mol %), [lutH]ClO<sub>4</sub> (0.3 mmol, 1 equiv), base (0.3 mmol, 1 equiv) in DMF (3 mL) at room temperature, 4 mA for 8 h. <sup>b</sup> Yields were determined by <sup>1</sup>H NMR using CH<sub>2</sub>Br<sub>2</sub> as an internal standard.

**Table S5. Screening the reaction time.<sup>a</sup>**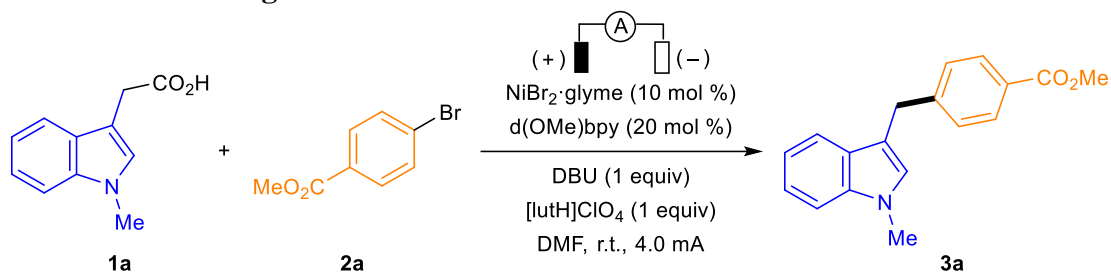

| Entry | Time (h) | Yield (%) <sup>b</sup> |
|-------|----------|------------------------|
| 1     | 8        | 60                     |
| 2     | 10       | 71 <sup>c</sup>        |
| 3     | 12       | 53                     |

<sup>a</sup> Reaction conditions: anode (Pt), cathode (Ni foam), **1a** (0.3 mmol, 1 equiv), **2a** (0.60 mmol, 2 equiv), NiBr<sub>2</sub> glyme (10 mol%), d(OMe)bpy (20 mol%), [lutH]ClO<sub>4</sub> (0.3 mmol, 1 equiv), DBU (0.3 mmol, 1 equiv) in DMF (3 mL) at room temperature, 4 mA. <sup>b</sup> Yields were determined by <sup>1</sup>H NMR using CH<sub>2</sub>Br<sub>2</sub> as an internal standard. <sup>c</sup> Isolated yield.

### 3. On/Off experiment

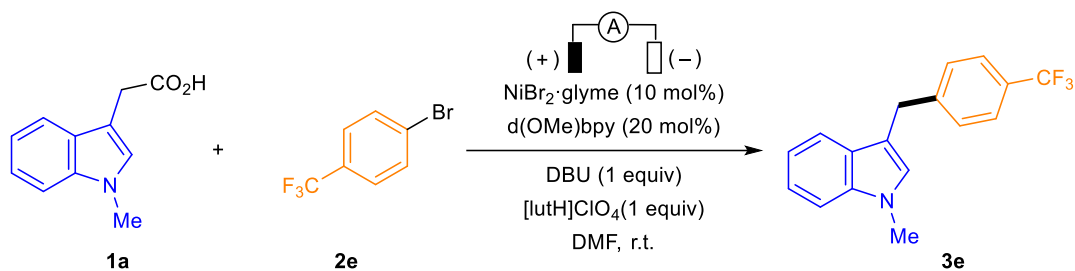

The dried nickel foam electrode ( $2.0 \times 3.0 \text{ cm}^2$ ), platinum electrode ( $1.0 \times 1.0 \text{ cm}^2$ ) and 10 mL hydrogenation tube charged with a proper stir bar are moved into the glove box. To the hydrogenation tube was added **1a** (0.3 mmol, 1 equiv), **2e** (0.60 mmol, 2 equiv),  $\text{NiBr}_2 \cdot \text{glyme}$  (10 mol %),  $\text{d(OMe)bpy}$  (20 mol %),  $[\text{lutH}]\text{ClO}_4$  (0.3 mmol, 1 equiv), DBU (0.3 mmol, 1 equiv), (trifluoromethoxy)benzene (0.3 mmol, 1 equiv) in DMF (3 mL). The tube was sealed with a septum equipped with anode (Pt), cathode (Ni foam), and the reaction mixture was electrolyzed under a constant current of 4.0 mA at room temperature. Periodically, an aliquot ( $\sim 0.1 \text{ mL}$ ) was removed from the mixture and analyzed by  $^{19}\text{F}$ -NMR (Figure S1).

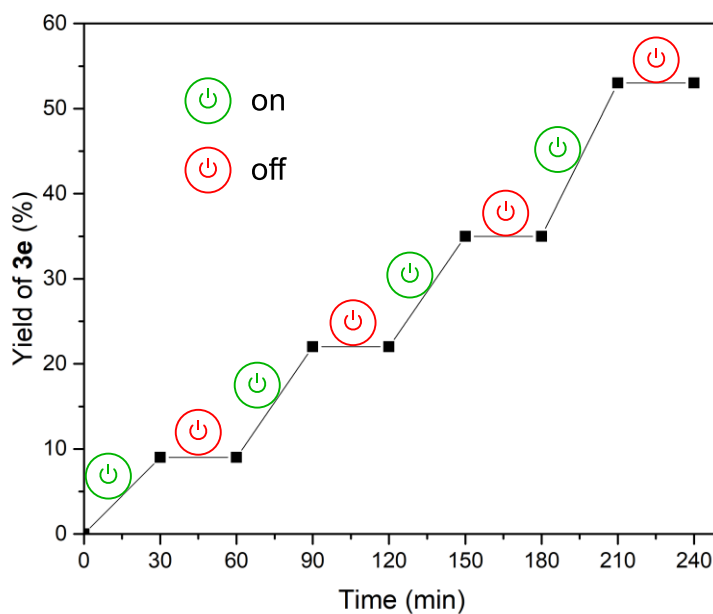

**Figure S1.** On/Off experiment.

## 4. Cyclic Voltammetry

Cyclic voltammograms were recorded with a CHI760E potentiostat at room temperature in DMF.  $n\text{-Bu}_4\text{NPF}_6$  (0.1 M) was used as the supporting electrolyte, and a Glass Carbon electrode or platinum electrode was used as the working electrode. The auxiliary electrode was a Pt sheet. All potentials are referenced against the  $\text{Ag}/\text{AgNO}_3$  redox couple. The scan rate was  $100\text{ mV s}^{-1}$ .

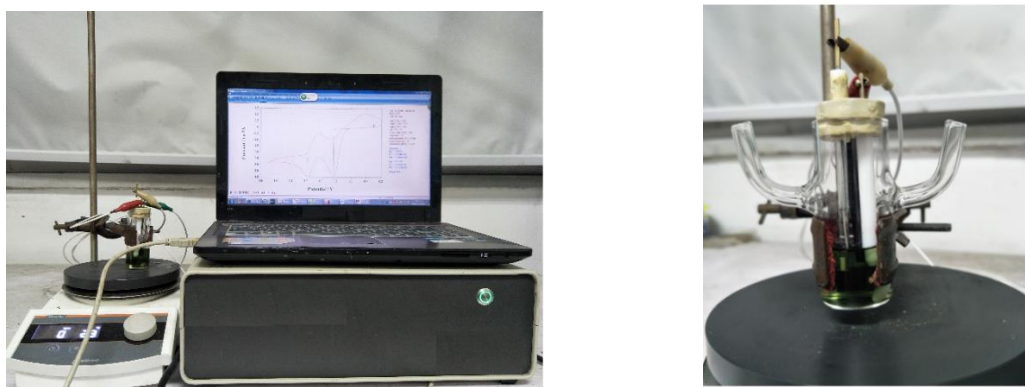

**Figure S1.** Photograph of setup used for cyclic voltammetry.

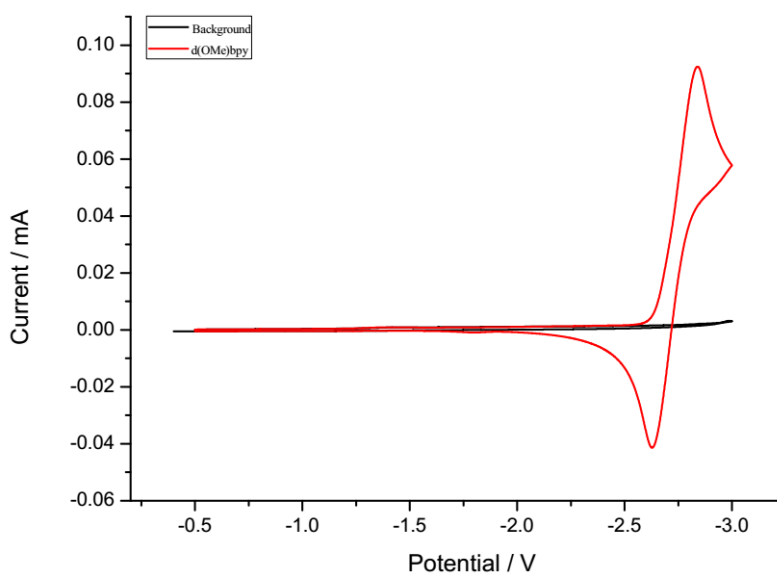

**Figure S2.** Cyclic voltammograms recorded on Glass Carbon electrode:  
(Red line) DMF containing 0.1 M of  $n\text{-Bu}_4\text{NPF}_6$ , 10 mM of d(OMe)bpy.  
(Black line) DMF containing 0.1 M  $n\text{-Bu}_4\text{NPF}_6$ .



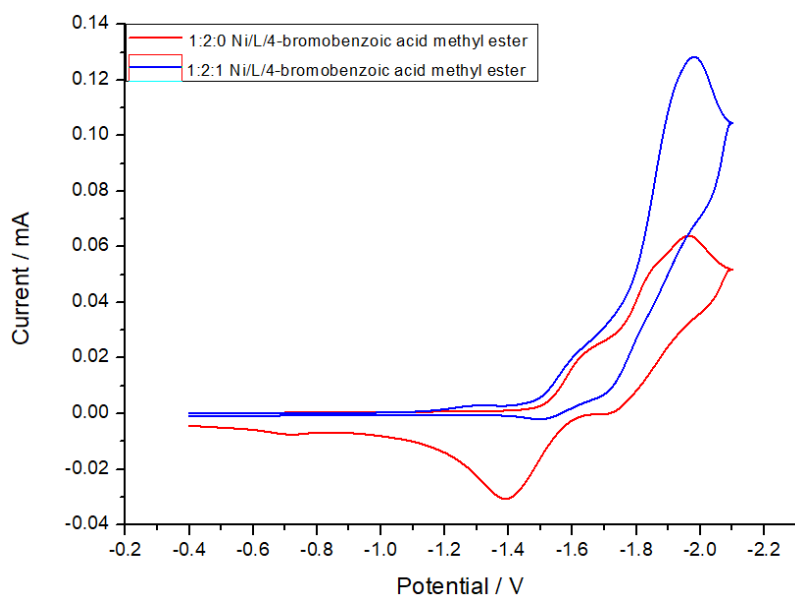

**Figure S3.** Cyclic voltammograms recorded on Glass Carbon electrode:  
**(Red line)** DMF containing 0.1 M of *n*-Bu<sub>4</sub>NPF<sub>6</sub>, 10 mM of NiBr<sub>2</sub> glyme and 20 mM d(OMe)bpy.  
**(Blue line)** Solution after addition of 10 mM **2a**.

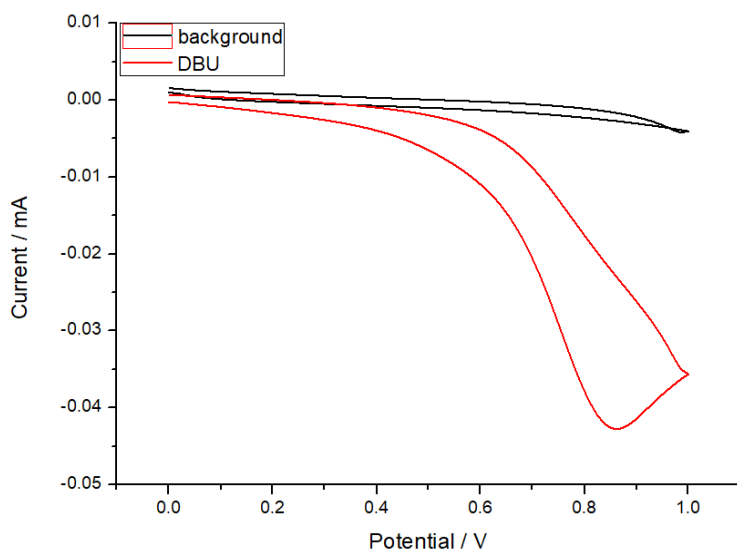

**Figure S4.** Cyclic voltammograms recorded on a platinum electrode:  
**(Black line)** DMF containing 0.1 M *n*-Bu<sub>4</sub>NPF<sub>6</sub>.  
**(Red line)** solution after addition of 10 mM DBU.

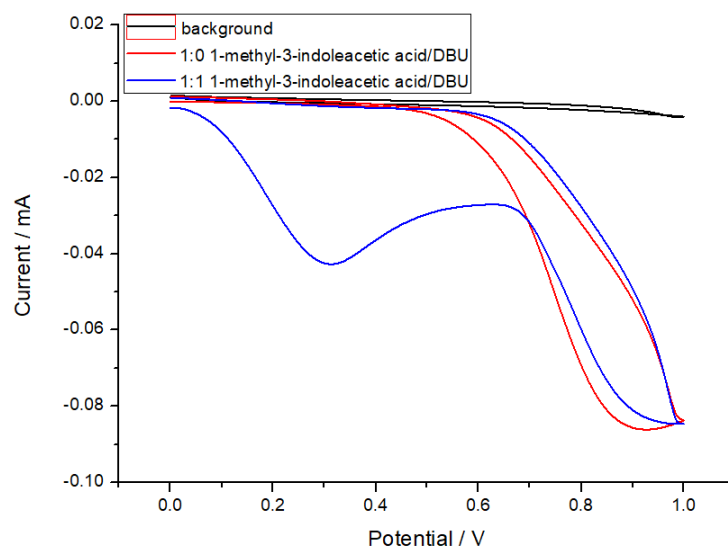

**Figure S5.** Cyclic voltammograms recorded on a platinum electrode:  
**(Black line)** DMF containing 0.1 M  $n\text{-Bu}_4\text{NPF}_6$ .  
**(Red line)** solution after addition of 10 mM **1a**.  
**(Blue line)** solution after addition of 10 mM DBU.

## 5. Potentials of Anode and Cathode During the Electrolysis

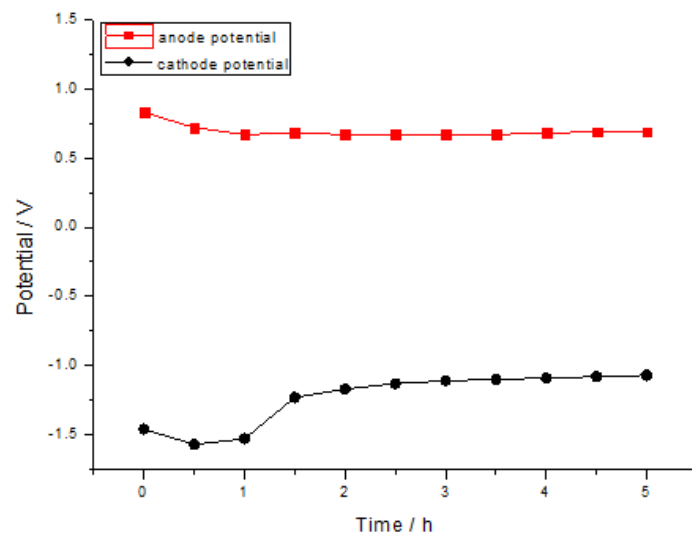

**Figure S8.** Electric potentials of anode and cathode from standard reaction conditions. All potentials are referenced against the Ag/AgNO<sub>3</sub> redox couple.

## 6. General Procedure and Characterization Data

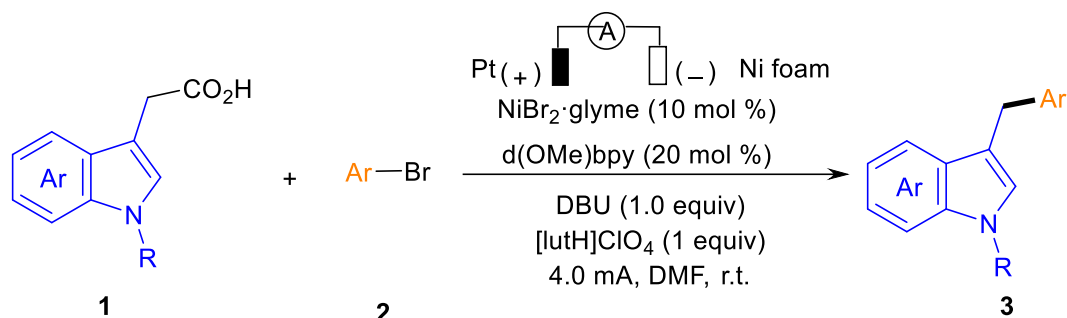

The dried nickel foam electrode ( $2.0 \times 3.0 \text{ cm}^2$ ), platinum electrode ( $1.0 \times 1.0 \text{ cm}^2$ ) and 10 mL hydrogenation tube charged with a proper stir bar are moved into the glove box. To the hydrogenation tube was added **1** (0.3 mmol, 1 equiv), **2** (0.60 mmol, 2 equiv), NiBr<sub>2</sub> glyme (10 mol %), d(OMe)bpy (20 mol %), [lutH]ClO<sub>4</sub> (0.3 mmol, 1 equiv), DBU (0.3 mmol, 1 equiv) in DMF (3 mL). The tube was sealed with a septum equipped with anode (Pt), cathode (Ni foam), and the reaction mixture was electrolyzed under a constant current of 4.0 mA for 10 h at room temperature. After the reaction was completed, the mixture was diluted with 20 mL of water and extracted with EtOAc ( $3 \times 20 \text{ mL}$ ). The organic layer was washed with saturated NH<sub>4</sub>Cl (aq.) (10 mL), dried over Na<sub>2</sub>SO<sub>4</sub>, filtered, and the solvent removed under reduced pressure. The crude product was purified by flash column chromatography (eluent: Petroleum ether), affording the desired product.

### Methyl 4-((1-methyl-1*H*-indol-3-yl)methyl)benzoate (**3a**)<sup>[1]</sup>

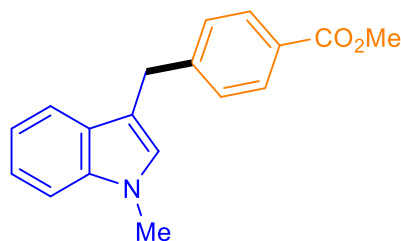

White solid (59.9 mg, 71% yield). <sup>1</sup>H NMR (400 MHz, CDCl<sub>3</sub>) δ 7.97 (d, *J* = 8.0 Hz, 2H), 7.48 (d, *J* = 8.0 Hz, 1H), 7.36 (d, *J* = 8.0 Hz, 2H), 7.31 (d, *J* = 8.0 Hz, 1H), 7.24 (t, *J* = 7.2 Hz, 1H), 7.09 (t, *J* = 7.2 Hz, 1H), 6.77 (s, 1H), 4.16 (s, 2H), 3.90 (s, 3H), 3.73 (s, 3H). <sup>13</sup>C{<sup>1</sup>H} NMR (100 MHz, CDCl<sub>3</sub>) δ 167.3, 147.1, 137.3, 129.9, 128.8, 128.0, 127.8, 127.4, 121.9, 119.2, 119.1, 113.3, 109.4, 52.1, 32.8, 31.8.

**Tert-butyl 4-((1-methyl-1H-indol-3-yl)methyl)benzoate (3b)**

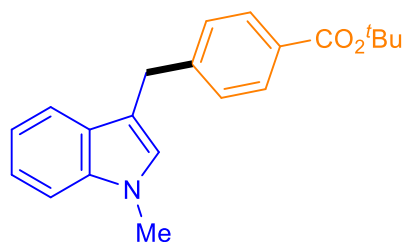

Colorless oil (67.5 mg, 70% yield). **<sup>1</sup>H NMR** (400 MHz, CDCl<sub>3</sub>) δ 7.96 (d, *J* = 8.0 Hz, 2H), 7.51 (d, *J* = 8.0 Hz, 1H), 7.37 (d, *J* = 8.0 Hz, 2H), 7.26 (t, *J* = 8.0 Hz, 1H), 7.11 (t, *J* = 7.8 Hz, 1H), 6.78 (s, 1H), 4.18 (s, 2H), 3.75 (s, 3H), 1.63 (s, 9H). **<sup>13</sup>C{<sup>1</sup>H} NMR** (100 MHz, CDCl<sub>3</sub>) δ 166.0, 146.5, 137.2, 129.8, 129.6, 128.6, 127.7, 127.3, 121.8, 119.2, 119.0, 113.5, 109.3, 80.8, 32.7, 31.7, 28.3. **HRMS** (EI) calculated for C<sub>21</sub>H<sub>23</sub>NO<sub>2</sub> [M]<sup>+</sup>: 321.1723, found: 321.1730. **IR** (neat): ν 2975, 1706, 1609, 1472, 1414, 1367, 1290, 1252, 1162, 1114, 1016, 909, 848, 799, 761, 736, 707, 565, 524, 452, 426 cm<sup>-1</sup>.

**1-(4-((1-Methyl-1H-indol-3-yl)methyl)phenyl)ethan-1-one (3c)**

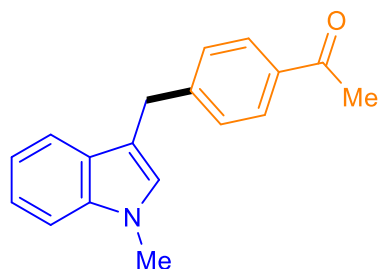

White solid (47.4 mg, 60% yield). Melting point 86.3–87.4 °C. **<sup>1</sup>H NMR** (400 MHz, CDCl<sub>3</sub>) δ 7.88 (d, *J* = 8.0 Hz, 2H), 7.48 (d, *J* = 8.4 Hz, 1H), 7.38 (d, *J* = 7.6 Hz, 2H), 7.31 (d, *J* = 8.4 Hz, 1H), 7.24 (t, *J* = 8.0 Hz, 1H), 7.09 (t, *J* = 6.8 Hz, 1H), 6.79 (s, 1H), 4.16 (s, 2H), 3.75 (s, 3H), 2.58 (s, 3H). **<sup>13</sup>C{<sup>1</sup>H} NMR** (100 MHz, CDCl<sub>3</sub>) δ 198.0, 147.4, 137.3, 135.2, 128.9, 128.6, 127.7, 127.3, 121.8, 119.1, 119.0, 113.2, 109.4, 32.7, 31.7, 26.7. **HRMS** (EI) calculated for C<sub>18</sub>H<sub>17</sub>NO [M]<sup>+</sup>: 263.1302, found: 263.1302. **IR** (neat): ν 3053, 2920, 1674, 1603, 1569, 1471, 1420, 1357, 1327, 1255, 1182, 1153, 1122, 1060, 1013, 954, 916, 852, 805, 784, 729, 687, 577, 471, 449, 425 cm<sup>-1</sup>.

***N*-methyl-4-((1-methyl-1*H*-indol-3-yl)methyl)benzamide (3d)**

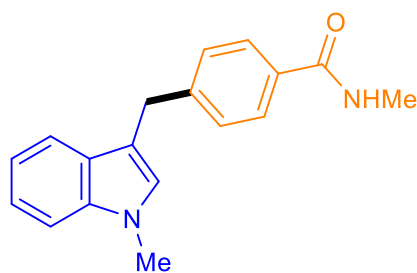

White solid (54.2 mg, 65% yield). Melting point 173.7–175.5 °C. **<sup>1</sup>H NMR** (400 MHz, CDCl<sub>3</sub>) δ 7.64 (d, *J* = 7.6 Hz, 2H), 7.45 (d, *J* = 8.0 Hz, 1H), 7.29 (d, *J* = 7.6 Hz, 3H), 7.21 (t, *J* = 7.6 Hz, 1H), 7.06 (t, *J* = 7.6 Hz, 1H), 6.74 (s, 1H), 6.24 (s, 1H), 4.11 (s, 2H), 3.71 (s, 3H), 2.95 (d, *J* = 4.8 Hz, 3H). **<sup>13</sup>C{<sup>1</sup>H} NMR** (100 MHz, CDCl<sub>3</sub>) δ 168.4, 145.2, 137.3, 132.4, 128.9, 127.7, 127.3, 127.0, 121.8, 119.2, 119.0, 113.5, 109.3, 32.7, 31.5, 26.9. **HRMS** (ESI) calculated for C<sub>18</sub>H<sub>19</sub>N<sub>2</sub>O [M+H]<sup>+</sup>: 279.1492, found: 279.1497. **IR** (neat): ν 3342, 2901, 1627, 1546, 1503, 1475, 1404, 1375, 1326, 1303, 1252, 1156, 1124, 1060, 1010, 921, 840, 791, 762, 736, 675, 645, 611, 565, 484, 423 cm<sup>-1</sup>.

**1-Methyl-3-(4-(trifluoromethyl)benzyl)-1*H*-indole (3e)<sup>[2]</sup>**

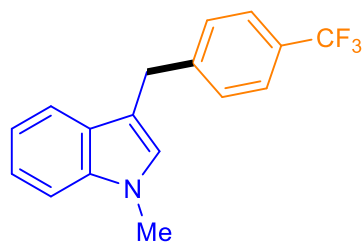

White solid (52.2 mg, 60% yield). **<sup>1</sup>H NMR** (400 MHz, CDCl<sub>3</sub>) δ 7.55 (d, *J* = 8.0 Hz, 2H), 7.50 (m, 1H), 7.41 (d, *J* = 8.0 Hz, 2H), 7.33 (m, 1H), 7.29–7.22 (m, 1H), 7.12 (m, 1H), 6.80 (s, 1H), 4.18 (s, 2H), 3.76 (s, 3H). **<sup>13</sup>C{<sup>1</sup>H} NMR** (100 MHz, CDCl<sub>3</sub>) δ 145.8, 137.4, 129.1, 128.3 (q, *J* = 32.0 Hz), 127.8, 127.4, 125.4 (q, *J* = 3.8 Hz), 124.6 (q, *J* = 272.0 Hz), 121.9, 119.2, 119.1, 113.2, 109.4, 32.8, 31.5. **<sup>19</sup>F NMR** (376 MHz, CDCl<sub>3</sub>) δ -62.2.

**3-(3,5-Bis(trifluoromethyl)benzyl)-1-methyl-1*H*-indol (3f)**

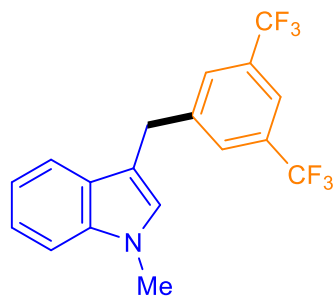

White solid (48.6 mg, 45% yield). Melting point 56–57 °C.  $^1\text{H NMR}$  (400 MHz,  $\text{CDCl}_3$ )  $\delta$  7.74–7.69 (m, 3H), 7.43 (m, 1H), 7.31–7.30 (m, 1H), 7.27–7.21 (m, 1H, contains residual solvent signal of  $\text{CDCl}_3$ ), 7.09 (m, 1H), 6.79 (s, 1H), 4.20 (s, 2H), 3.75 (s, 3H).  $^{13}\text{C}\{^1\text{H}\}$  NMR (100 MHz,  $\text{CDCl}_3$ )  $\delta$  144.1, 137.3, 131.5 (q,  $J = 33.0$  Hz), 128.80, 128.77, 127.40, 127.36, 123.50 (q,  $J = 272.0$  Hz), 122.0, 120.28–119.93 (m), 119.3, 118.7, 112.1, 109.5, 32.72, 31.4.  $^{19}\text{F NMR}$  (376 MHz,  $\text{CDCl}_3$ )  $\delta$  -62.9. HRMS (EI) calcd for  $\text{C}_{18}\text{H}_{13}\text{F}_6\text{N}$   $[\text{M}]^+$ : 357.0947, found: 357.0956. IR (neat):  $\nu$  3047, 2919, 1618, 1468, 1372, 1276, 1164, 1119, 734, 702, 679, 426  $\text{cm}^{-1}$ .

#### 4-((1-Methyl-1H-indol-3-yl)methyl)benzonitrile (3g)

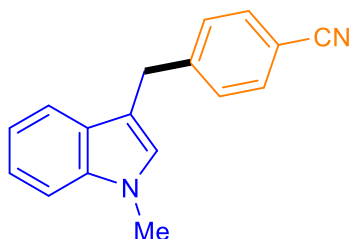

White solid (45.0 mg, 62% yield). Melting point 75–77 °C.  $^1\text{H NMR}$  (400 MHz,  $\text{CDCl}_3$ )  $\delta$  7.51 (d,  $J = 8.0$  Hz, 2H), 7.40 (m, 1H), 7.33 (d,  $J = 8.0$  Hz, 2H), 7.29 (m, 1H), 7.25–7.19 (m, 1H), 7.09–7.02 (m, 1H), 6.78 (s, 1H), 4.13 (s, 2H), 3.72 (s, 3H).  $^{13}\text{C}\{^1\text{H}\}$  NMR (100 MHz,  $\text{CDCl}_3$ )  $\delta$  147.3, 137.3, 132.2, 129.4, 127.6, 127.4, 121.9, 119.2, 119.2, 119.0, 112.4, 109.8, 109.4, 32.7, 31.7. HRMS (ESI) calcd for  $\text{C}_{17}\text{H}_{15}\text{N}_2$   $[\text{M}+\text{H}]^+$ : 247.1230, found: 247.1230. IR (neat):  $\nu$  3049, 2912, 2222, 1604, 1501, 1370, 1326, 1238, 841, 814, 737, 546, 426  $\text{cm}^{-1}$ .

#### 1-Methyl-3-(4-(methylsulfonyl)benzyl)-1H-indole (3h)

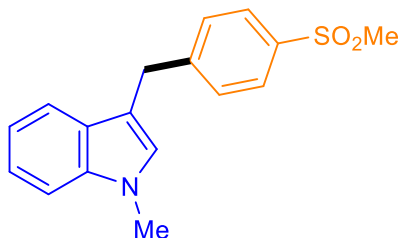

White solid (66.9 mg, 75% yield). Melting point 113–114 °C.  $^1\text{H NMR}$  (400 MHz,  $\text{CDCl}_3$ )  $\delta$  7.81 (d,  $J = 8.0$  Hz, 2H), 7.47–7.40 (m, 3H), 7.29 (m, 1H), 7.22 (m, 1H), 7.06 (m, 1H), 6.80 (s, 1H), 4.16 (s, 2H), 3.73 (s, 3H), 2.99 (s, 3H).  $^{13}\text{C}\{^1\text{H}\}$  NMR (100 MHz,  $\text{CDCl}_3$ )  $\delta$  148.3, 138.1, 137.3, 129.6, 127.6, 127.5, 127.4, 121.9, 119.1, 119.0, 112.5, 109.5, 44.6, 32.7, 31.6. HRMS (ESI) calculated for

C<sub>17</sub>H<sub>18</sub>NO<sub>2</sub>S [M+H]<sup>+</sup>: 300.1053, found: 300.1046. **IR** (neat):  $\nu$  2917, 1613, 1468, 1418, 1300, 1141, 1087, 956, 764, 750, 730, 520, 423 cm<sup>-1</sup>.

**3-(4-Fluorobenzyl)-1-methyl-1H-indole (3i)**

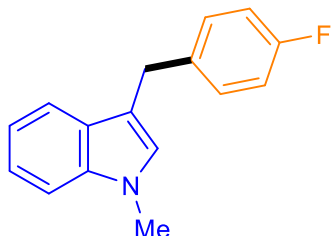

Pale-red oil (34.3 mg, 48% yield). **<sup>1</sup>H NMR** (400 MHz, CDCl<sub>3</sub>)  $\delta$  7.47 (d,  $J$  = 8.0 Hz, 1H), 7.28 (d,  $J$  = 8.0 Hz, 1H), 7.25–7.18 (m, 3H, contains residual solvent signal of CDCl<sub>3</sub>), 7.06 (m, 1H), 6.97–6.90 (m, 2H), 6.73 (s, 1H), 4.05 (s, 2H), 3.71 (s, 3H). **<sup>13</sup>C{<sup>1</sup>H} NMR** (100 MHz, CDCl<sub>3</sub>)  $\delta$  161.3 (d,  $J$  = 242.0 Hz), 137.3, 137.1 (d,  $J$  = 3.0 Hz), 130.0 (d,  $J$  = 8.0 Hz), 127.7, 127.1, 121.7, 119.2, 118.9, 115.1 (d,  $J$  = 21.0 Hz), 114.2, 109.3, 32.6, 30.8. **<sup>19</sup>F NMR** (376 MHz, CDCl<sub>3</sub>)  $\delta$  -118.0. **HRMS** (EI) calculated for C<sub>16</sub>H<sub>14</sub>FN [M]<sup>+</sup>: 239.1105, found: 239.1101. **IR** (neat):  $\nu$  3049, 2910, 1601, 1552, 1504, 1372, 1216, 1153, 1011, 806, 735, 509, 425 cm<sup>-1</sup>.

**3-(4-Chlorobenzyl)-1-methyl-1H-indole (3j)**

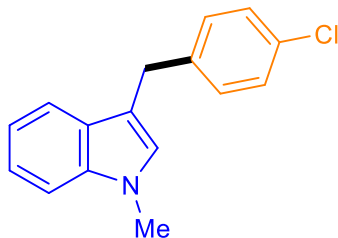

White solid (55.7 mg, 73% yield). Melting point 63–65 °C. **<sup>1</sup>H NMR** (400 MHz, CDCl<sub>3</sub>)  $\delta$  7.45 (d,  $J$  = 8.0 Hz, 1H), 7.27 (d,  $J$  = 8.0 Hz, 1H), 7.24–7.16 (m, 5H), 7.06 (m, 1H), 6.72 (s, 1H), 4.04 (s, 2H), 3.70 (s, 3H). **<sup>13</sup>C{<sup>1</sup>H} NMR** (101 MHz, CDCl<sub>3</sub>)  $\delta$  140.0, 137.3, 131.6, 130.1, 128.5, 127.7, 127.2, 121.8, 119.2, 119.0, 113.7, 109.3, 32.7, 31.0. **HRMS** (EI) calculated for C<sub>16</sub>H<sub>14</sub>ClN [M]<sup>+</sup>: 255.0809, found: 255.0818. **IR** (neat):  $\nu$  3049, 2900, 1480, 1324, 1086, 1063, 1009, 799, 777, 733, 563, 475, 424 cm<sup>-1</sup>.



### 3-([1,1'-Biphenyl]-4-ylmethyl)-1-methyl-1H-indole (3k)

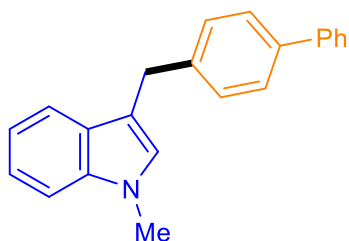

Colorless oil (67.2 mg, 76% yield).  $^1\text{H NMR}$  (400 MHz,  $\text{CDCl}_3$ )  $\delta$  7.40–7.29 (m, 7H), 7.29–7.22 (m, 4H, contains residual solvent signal of  $\text{CDCl}_3$ ), 7.20–7.18 (m, 1H), 7.02 (m, 1H), 6.50 (s, 1H), 4.03 (s, 2H), 3.65 (s, 3H).  $^{13}\text{C}\{^1\text{H}\}$  NMR (100 MHz,  $\text{CDCl}_3$ )  $\delta$  141.89, 141.85, 138.5, 137.1, 130.1, 129.4, 128.2, 127.43, 127.42, 126.9, 126.0, 121.5, 119.3, 118.7, 114.9, 109.1, 32.6, 29.0. HRMS (ESI) calculated for  $\text{C}_{22}\text{H}_{20}\text{N}$   $[\text{M}+\text{H}]^+$ : 298.1590, found: 298.1588. IR (neat):  $\nu$  3053, 2912, 1474, 1371, 1326, 1009, 907, 735, 701, 550, 426  $\text{cm}^{-1}$ .

### Methyl 2-(4-((1-methyl-1H-indol-3-yl)methyl)phenyl)acetate (3l)

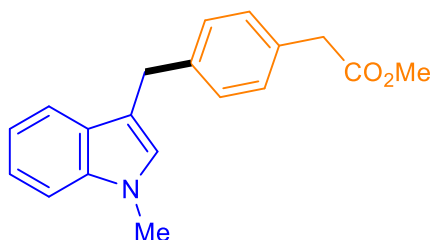

Colorless oil (62.4 mg, 71% yield).  $^1\text{H NMR}$  (400 MHz,  $\text{CDCl}_3$ )  $\delta$  7.50 (d,  $J = 8.0$  Hz, 1H), 7.31–7.12 (m, 6H, contains residual solvent signal of  $\text{CDCl}_3$ ), 7.06 (m, 1H), 6.73 (s, 1H), 4.07 (s, 2H), 3.70 (s, 3H), 3.66 (s, 3H), 3.57 (s, 2H).  $^{13}\text{C}\{^1\text{H}\}$  NMR (100 MHz,  $\text{CDCl}_3$ )  $\delta$  172.3, 140.4, 137.2, 131.5, 129.3, 128.9, 127.9, 127.2, 121.6, 119.2, 118.8, 114.2, 109.2, 52.1, 40.0, 32.6, 31.2. HRMS (ESI) calculated for  $\text{C}_{19}\text{H}_{20}\text{NO}_2$   $[\text{M}+\text{H}]^+$ : 294.1489, found: 294.1488. IR (neat):  $\nu$  2948, 1732, 1551, 1512, 1470, 1326, 1151, 1010, 737, 565, 426  $\text{cm}^{-1}$ .

### 3-(4-(*Tert*-butyl)benzyl)-1-methyl-1H-indole (3m)

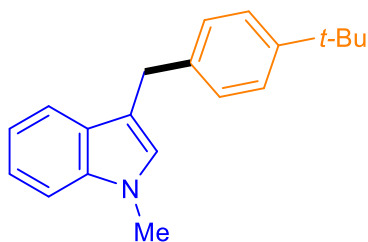

Colorless oil (41.4 mg, 50% yield).  $^1\text{H NMR}$  (400 MHz,  $\text{CDCl}_3$ )  $\delta$  7.54 (d,  $J = 8.0$  Hz, 1H), 7.30–7.18 (m, 6H, contains residual solvent signal of  $\text{CDCl}_3$ ), 7.07 (m, 1H), 6.74 (s, 1H), 4.06 (s, 2H), 3.70 (s, 3H), 1.29 (s, 9H).  $^{13}\text{C}\{^1\text{H}\}$  NMR (100 MHz,  $\text{CDCl}_3$ )  $\delta$  148.6, 138.5, 137.2, 128.3, 128.0, 127.1, 125.3, 121.6, 119.3, 118.8, 114.5, 109.2, 34.4, 32.6, 31.5, 31.0. HRMS (EI) calculated for  $\text{C}_{20}\text{H}_{23}\text{N}$   $[\text{M}]^+$ : 277.1825, found: 277.1828. IR (neat):  $\nu$  2956, 1512, 1469, 1370, 1325, 1012, 735, 567, 547, 426  $\text{cm}^{-1}$ .

### 3-(3,5-Dimethylbenzyl)-1-methyl-1H-indole (3n)

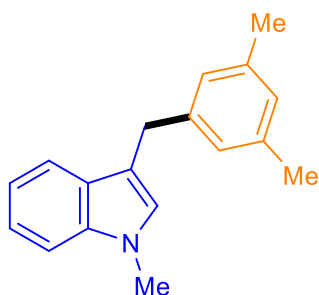

Colorless oil (38.9 mg, 52% yield).  $^1\text{H NMR}$  (400 MHz,  $\text{CDCl}_3$ )  $\delta$  7.59 (d,  $J = 7.6$  Hz, 1H), 7.31 (d,  $J = 8.0$  Hz, 1H), 7.27 – 7.22 (m, 1H), 7.12 (t,  $J = 7.6$  Hz, 1H), 6.95 (s, 2H), 6.87 (s, 1H), 6.77 (s, 1H), 4.06 (s, 2H), 3.75 (s, 3H), 2.31 (s, 6H).  $^{13}\text{C}\{^1\text{H}\}$  NMR (100 MHz,  $\text{CDCl}_3$ )  $\delta$  141.4, 137.9, 137.2, 128.0, 127.6, 127.2, 126.7, 121.6, 119.3, 118.8, 114.6, 109.2, 32.7, 31.4, 21.5. HRMS (EI) calculated for  $\text{C}_{18}\text{H}_{19}\text{N}$   $[\text{M}]^+$ : 249.1512, found: 249.1512. IR (neat):  $\nu$  3012, 2911, 1603, 1469, 1423, 1372, 1327, 1249, 1151, 1120, 1059, 1011, 848, 800, 735, 712, 626, 566, 541, 426  $\text{cm}^{-1}$ .

### 3-(4-Cyclopropylbenzyl)-1-methyl-1H-indole (3o)

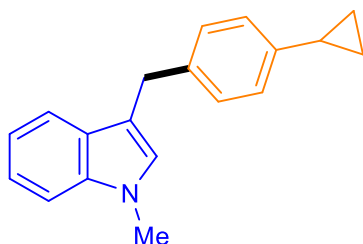

White solid (47.8 mg, 61% yield). Melting point 73.9–75.1  $^{\circ}\text{C}$ .  $^1\text{H NMR}$  (400 MHz,  $\text{CDCl}_3$ )  $\delta$  7.56 (d,  $J = 8.0$  Hz, 1H), 7.31 (d,  $J = 8.4$  Hz, 1H), 7.26–7.20 (m, 3H), 7.10 (t,  $J = 7.2$  Hz, 1H), 7.02 (d,  $J = 7.6$  Hz, 2H), 6.75 (s, 1H), 4.08 (s, 2H), 3.73 (s, 3H), 1.93–1.86 (m, 1H), 0.97–0.93 (m, 2H), 0.71–0.67 (m, 2H).  $^{13}\text{C}$  NMR (101 MHz,  $\text{CDCl}_3$ )  $\delta$  141.5, 138.5, 137.2, 128.7, 127.9, 127.2, 125.7, 121.6, 119.3, 118.8, 114.6, 109.2, 32.7, 31.2, 15.2, 9.2. HRMS (EI) calculated for  $\text{C}_{19}\text{H}_{19}\text{N}$   $[\text{M}]^+$ : 261.1512,

found: 261.1512. **IR** (neat):  $\nu$  2997, 2919, 1614, 1553, 1513, 1458, 1418, 1375, 1326, 1253, 1215, 1182, 1152, 1125, 1040, 1008, 919, 898, 804, 734, 567, 530, 429  $\text{cm}^{-1}$ .

**1-(4-((1-Methyl-1*H*-indol-3-yl)methyl)phenyl)cyclopropane-1-carbonitrile (3p)**

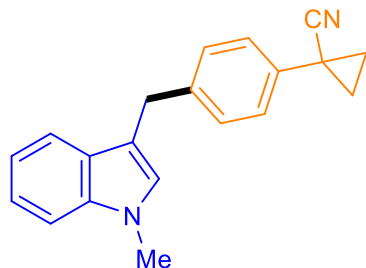

Light yellow oil (65.3 mg, 76% yield).  **$^1\text{H}$  NMR** (400 MHz,  $\text{CDCl}_3$ )  $\delta$  7.51 (d,  $J = 8.0$  Hz, 1H), 7.33-7.21 (m, 6H), 7.10 (t,  $J = 7.6$  Hz, 1H), 6.78 (s, 1H), 4.11 (s, 2H), 3.74 (s, 3H), 1.71-1.68 (m, 2H), 1.38-1.35 (m, 2H).  **$^{13}\text{C}\{^1\text{H}\}$  NMR** (100 MHz,  $\text{CDCl}_3$ )  $\delta$  141.2, 137.2, 133.5, 129.2, 127.7, 127.2, 125.9, 122.9, 121.7, 119.2, 118.9, 113.8, 109.3, 32.7, 31.1, 18.0, 13.6. **HRMS** (DART) calculated for  $\text{C}_{20}\text{H}_{19}\text{N}_2$   $[\text{M}+\text{H}]^+$ : 287.1543, found: 287.1540. **IR** (neat):  $\nu$  2909, 2233, 1613, 1512, 1470, 1425, 1373, 1326, 1250, 1152, 1120, 1062, 1014, 944, 910, 780, 736, 665, 565, 524, 505, 427  $\text{cm}^{-1}$ .

**3-(3-Methoxy-4-methylbenzyl)-1-methyl-1*H*-indole (3q)**

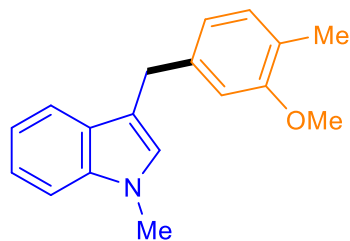

Light yellow oil (33.4 mg, 42% yield).  **$^1\text{H}$  NMR** (400 MHz,  $\text{CDCl}_3$ )  $\delta$  7.61 – 7.55 (m, 1H), 7.33 – 7.28 (m, 1H), 7.26 – 7.22 (m, 1H), 7.14 – 7.03 (m, 2H), 6.81 (d,  $J = 6.4$  Hz, 2H), 6.76 (s, 1H), 4.09 (s, 2H), 3.79 (s, 3H), 3.74 (s, 3H), 2.21 (s, 3H).  **$^{13}\text{C}\{^1\text{H}\}$  NMR** (100 MHz,  $\text{CDCl}_3$ )  $\delta$  157.8, 140.3, 137.3, 130.5, 128.0, 127.2, 124.1, 121.7, 120.6, 119.3, 118.9, 114.7, 110.7, 109.2, 55.4, 32.7, 31.7, 16.0. **HRMS** (EI) calculated for  $\text{C}_{18}\text{H}_{19}\text{NO}$   $[\text{M}]^+$ : 265.1461, found: 265.1465. **IR** (neat):  $\nu$  2914, 1723, 1612, 1583, 1506, 1464, 1411, 1373, 1327, 1252, 1150, 1129, 1039, 1011, 944, 855, 791, 736, 683, 598, 558, 448, 427  $\text{cm}^{-1}$ .

### 3-(4-Methoxybenzyl)-1-methyl-1H-indole (3r)<sup>[3]</sup>

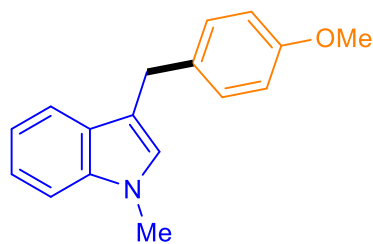

Colorless oil (48.6 mg, 65% yield). <sup>1</sup>H NMR (400 MHz, CDCl<sub>3</sub>) δ 7.50 (d, *J* = 8.0 Hz, 1H), 7.26 (m, 1H), 7.22–7.17 (m, 3H), 7.05 (m, 1H), 6.81 (d, *J* = 8.8 Hz, 2H), 6.70 (s, 1H), 4.03 (s, 2H), 3.75 (s, 3H), 3.69 (s, 3H). <sup>13</sup>C{<sup>1</sup>H} NMR (101 MHz, CDCl<sub>3</sub>) δ 157.9, 137.3, 133.6, 129.6, 127.9, 127.1, 121.6, 119.3, 118.8, 114.8, 113.8, 109.2, 55.3, 32.6, 30.7.

### 1-Methyl-3-(4-phenoxybenzyl)-1H-indole (3s)

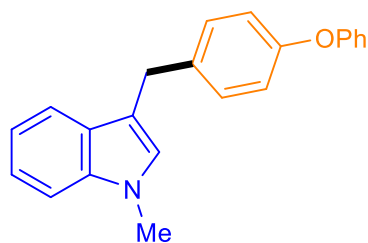

White solid (62.5 mg, 67% yield). Melting point 92–94 °C. <sup>1</sup>H NMR (400 MHz, CDCl<sub>3</sub>) δ 7.51 (d, *J* = 8.0 Hz, 1H), 7.32–7.26 (m, 3H), 7.25–7.19 (m, 3H), 7.10–7.03 (m, 2H), 6.98 (d, *J* = 7.6 Hz, 2H), 6.92 (d, *J* = 8.4 Hz, 2H), 6.76 (s, 1H), 4.07 (s, 2H), 3.71 (s, 3H). <sup>13</sup>C{<sup>1</sup>H} NMR (100 MHz, CDCl<sub>3</sub>) δ 157.7, 155.2, 137.3, 136.5, 129.9, 129.7, 127.8, 127.1, 123.0, 121.7, 119.3, 119.1, 118.9, 118.6, 114.4, 109.2, 32.7, 30.9. HRMS (EI) calculated for C<sub>22</sub>H<sub>19</sub>NO [M]<sup>+</sup>: 313.1461, found: 313.1467. IR (neat): ν 2917, 1583, 1477, 1325, 1221, 1012, 866, 757, 734, 691, 655, 561, 491, 424 cm<sup>-1</sup>.

### 1-Methyl-3-(4-(methylthio)benzyl)-1H-indole (3t)

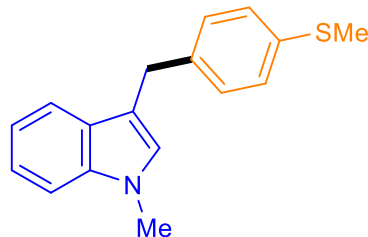

Colorless oil (36.1 mg, 45% yield). <sup>1</sup>H NMR (400 MHz, CDCl<sub>3</sub>) δ 7.53 (d, *J* = 8.0 Hz, 1H), 7.31 (d, *J* = 8.0 Hz, 1H), 7.27–7.18 (m, 5H), 7.10 (t, *J* = 7.6 Hz, 1H), 6.77 (s, 1H), 4.09 (s, 2H), 3.74 (s, 3H), 2.48 (s, 3H). <sup>13</sup>C{<sup>1</sup>H} NMR (100 MHz, CDCl<sub>3</sub>) δ 138.7, 137.3, 135.4, 129.3, 127.8, 127.2, 127.2, 121.7, 119.3, 118.9, 114.2, 109.3, 32.7, 31.1, 16.4. HRMS (EI) calculated for C<sub>17</sub>H<sub>17</sub>NS [M]<sup>+</sup>:

267.1076, found: 267.1081. **IR** (neat):  $\nu$  2915, 1613, 1470, 1423, 1372, 1325, 1250, 1200, 1152, 1093, 1058, 1012, 965, 844, 794, 736, 665, 564, 523, 488, 427  $\text{cm}^{-1}$ .

**1-Methyl-3-(4-(trifluoromethoxy)benzyl)-1H-indole (3u)**

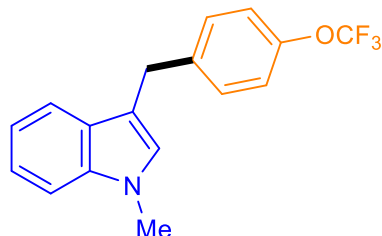

White solid (40.0 mg, 44% yield). Melting point 71–73 °C.  **$^1\text{H}$  NMR** (400 MHz,  $\text{CDCl}_3$ )  $\delta$  7.47 (d,  $J = 8.0$  Hz, 1H), 7.31–7.25 (m, 3H), 7.24–7.21 (m, 1H), 7.13–7.05 (m, 3H), 6.76 (s, 1H), 4.09 (s, 2H), 3.73 (s, 3H).  **$^{13}\text{C}\{^1\text{H}\}$  NMR** (100 MHz,  $\text{CDCl}_3$ )  $\delta$  147.5, 140.2, 137.2, 129.9, 127.7, 127.2, 121.8, 120.9, 120.6 (q,  $J = 255.0$  Hz), 119.1, 119.0, 113.6, 109.3, 32.7, 30.9.  **$^{19}\text{F}$  NMR** (376 MHz,  $\text{CDCl}_3$ )  $\delta$  -58.0. **HRMS** (EI) calculated for  $\text{C}_{17}\text{H}_{14}\text{F}_3\text{NO}$   $[\text{M}]^+$ : 305.1022, found: 305.1025. **IR** (neat):  $\nu$  2919, 1552, 1504, 1471, 1427, 1221, 1150, 1100, 1014, 915, 810, 782, 731, 681, 424  $\text{cm}^{-1}$ .

**1-Methyl-3-(4-((trifluoromethyl)thio)benzyl)-1H-indole (3v)**

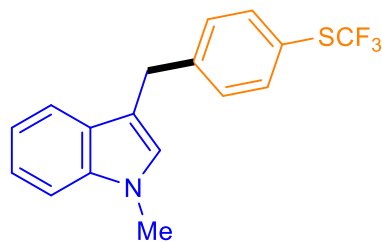

Colorless oil (56 mg, 58% yield).  **$^1\text{H}$  NMR** (400 MHz,  $\text{CDCl}_3$ )  $\delta$  7.56 (d,  $J = 8.4$  Hz, 2H), 7.49 (d,  $J = 8.0$  Hz, 1H), 7.38–7.31 (m, 3H), 7.25 (t,  $J = 7.6$  Hz, 1H), 7.10 (t,  $J = 7.6$  Hz, 1H), 6.81 (s, 1H), 4.15 (s, 2H), 3.76 (s, 3H).  **$^{13}\text{C}\{^1\text{H}\}$  NMR** (125 MHz,  $\text{CDCl}_3$ )  $\delta$  145.0, 137.3, 136.6, 129.9, 129.8 (q,  $J = 306.25$  Hz), 127.8, 127.4, 121.9, 121.47, 121.45, 119.2, 119.1, 113.2, 109.4, 32.8, 31.4.  **$^{19}\text{F}$  NMR** (376 MHz,  $\text{CDCl}_3$ )  $\delta$  -43.04. **HRMS** (EI) calculated for  $\text{C}_{17}\text{H}_{14}\text{F}_3\text{NS}$   $[\text{M}]^+$ : 321.0794, found: 321.0804. **IR** (neat):  $\nu$  2913, 1593, 1471, 1374, 1328, 1254, 1108, 1014, 921, 797, 737, 673, 565, 524, 502, 426  $\text{cm}^{-1}$ .

**1-Methyl-3-(4-(4,4,5,5-tetramethyl-1,3,2-dioxaborolan-2-yl)benzyl)-1H-indole (3w)**

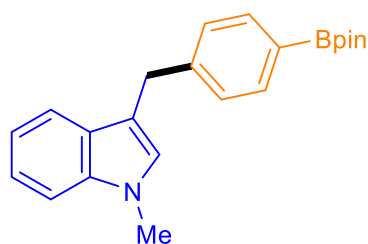

Colorless oil (62.5 mg, 60% yield).  $^1\text{H NMR}$  (400 MHz,  $\text{CDCl}_3$ )  $\delta$  7.80 – 7.72 (m, 2H), 7.51 (d,  $J = 8.0$  Hz, 1H), 7.34 – 7.27 (m, 3H), 7.25 – 7.20 (m, 1H), 7.07 (t,  $J = 7.6$  Hz, 1H), 6.73 (s, 1H), 4.12 (s, 2H), 3.72 (s, 3H), 1.35 (s, 12H).  $^{13}\text{C}\{^1\text{H}\}$  NMR (100 MHz,  $\text{CDCl}_3$ )  $\delta$  144.9, 137.3, 135.0, 128.3, 127.9, 127.3, 121.7, 119.3, 118.9, 114.1, 109.2, 83.8, 32.7, 31.9, 25.0. HRMS (ESI) calculated for  $\text{C}_{22}\text{H}_{27}\text{BNO}_2$   $[\text{M}+\text{H}]^+$ : 348.2129, found: 348.2129. IR (neat):  $\nu$  2977, 2921, 1609, 1515, 1469, 1394, 1356, 1318, 1267, 1212, 1141, 1085, 1012, 961, 857, 782, 736, 666, 561, 521, 443, 427  $\text{cm}^{-1}$ .

**N-(4-((1-methyl-1H-indol-3-yl)methyl)phenyl)acetamide (3x)**

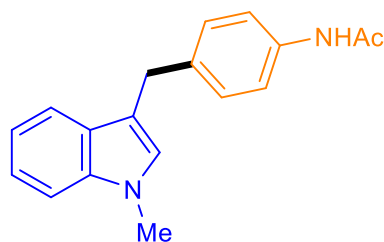

White solid (41.8 mg, 50% yield). Melting point 154.1–155.2  $^{\circ}\text{C}$ .  $^1\text{H NMR}$  (500 MHz,  $\text{CDCl}_3$ )  $\delta$  7.51 (d,  $J = 8.0$  Hz, 1H), 7.48 (s, 1H), 7.40 (d,  $J = 8.5$  Hz, 2H), 7.30 (d,  $J = 8.0$  Hz, 1H), 7.24 – 7.19 (m, 3H), 7.08 (t,  $J = 7.5$  Hz, 1H), 6.74 (s, 1H), 4.06 (s, 2H), 3.71 (s, 3H), 2.13 (s, 3H).  $^{13}\text{C}\{^1\text{H}\}$  NMR (125 MHz,  $\text{CDCl}_3$ )  $\delta$  168.5, 137.6, 137.3, 135.9, 129.2, 127.8, 127.2, 121.7, 120.2, 119.3, 118.9, 114.3, 109.3, 32.7, 31.1, 24.6. HRMS (ESI) calculated for  $\text{C}_{18}\text{H}_{18}\text{N}_2\text{ONa}$   $[\text{M}+\text{Na}]^+$ : 301.1311, found: 301.1303. IR (neat):  $\nu$  2922, 1655, 1598, 1532, 1510, 1471, 1410, 1370, 1311, 1264, 1125, 1065, 1007, 963, 924, 863, 824, 781, 734, 674, 601, 564, 523, 493, 426  $\text{cm}^{-1}$ .

**1-Methyl-3-(naphthalen-1-ylmethyl)-1H-indole (3y)**

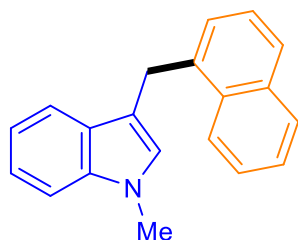

White solid (40.0 mg, 50% yield). Melting point 72–73 °C.  $^1\text{H NMR}$  (400 MHz,  $\text{CDCl}_3$ )  $\delta$  8.09 (d,  $J = 8.0$  Hz, 1H), 7.88–7.83 (m, 1H), 7.76–7.71 (m, 1H), 7.63 (d,  $J = 8.0$  Hz, 1H), 7.47–7.34 (m, 4H), 7.30–7.19 (m, 2H), 7.14–7.07 (m, 1H), 6.50 (s, 1H), 4.52 (s, 2H), 3.61 (s, 3H).  $^{13}\text{C}\{^1\text{H}\}$  NMR (100 MHz,  $\text{CDCl}_3$ )  $\delta$  137.2, 137.1, 133.9, 132.3, 128.6, 127.9, 127.6, 126.9, 126.7, 125.8, 125.7, 125.5, 124.5, 121.7, 119.2, 118.9, 113.9, 109.2, 32.6, 28.9. **HRMS** (EI) calculated for  $\text{C}_{20}\text{H}_{17}\text{N}$   $[\text{M}]^+$ : 271.1356, found: 271.1355. **IR** (neat):  $\nu$  3049, 2908, 1688, 1469, 1370, 1327, 1244, 1011, 785, 771, 734, 606, 520, 426, 410  $\text{cm}^{-1}$ .

### 1-Methyl-3-(naphthalen-2-ylmethyl)-1H-indole (3z)

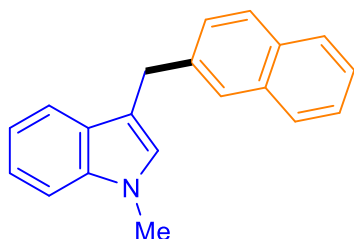

White solid (60.2 mg, 74% yield). Melting point 71–73 °C.  $^1\text{H NMR}$  (400 MHz,  $\text{CDCl}_3$ )  $\delta$  7.92–7.82 (m, 4H), 7.66 (d,  $J = 8.0$  Hz, 1H), 7.56–7.49 (m, 3H), 7.42–7.30 (m, 2H), 7.22–7.15 (m, 1H), 6.84 (s, 1H), 4.36 (s, 2H), 3.78 (s, 3H).  $^{13}\text{C}\{^1\text{H}\}$  NMR (100 MHz,  $\text{CDCl}_3$ )  $\delta$  139.1, 137.3, 133.8, 132.2, 127.98, 127.96, 127.8, 127.72, 127.66, 127.4, 126.7, 125.9, 125.3, 121.7, 119.3, 118.9, 114.3, 109.3, 32.7, 31.9. **HRMS** (EI) calculated for  $\text{C}_{20}\text{H}_{17}\text{N}$   $[\text{M}]^+$ : 271.1356, found: 271.1355. **IR** (neat):  $\nu$  3051, 2912, 1466, 1327, 1253, 824, 810, 736, 565, 471, 426  $\text{cm}^{-1}$ .

### 3-((6-Methoxynaphthalen-2-yl)methyl)-1-methyl-1H-indole (3aa)

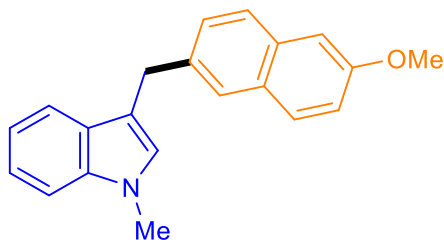

White solid (47 mg, 52% yield). Melting point 89.3–90.5 °C.  $^1\text{H NMR}$  (400 MHz,  $\text{CDCl}_3$ )  $\delta$  7.68 (d,  $J = 8.8$  Hz, 3H), 7.57 (d,  $J = 8.4$  Hz, 1H), 7.42 (d,  $J = 8.4$  Hz, 1H), 7.30 (s, 1H), 7.23 (d,  $J = 8.4$  Hz, 1H), 7.16–7.04 (m, 3H), 6.77 (s, 1H), 4.25 (s, 2H), 3.92 (s, 3H), 3.72 (s, 3H).  $^{13}\text{C}\{^1\text{H}\}$  NMR (100 MHz,  $\text{CDCl}_3$ )  $\delta$  157.3, 137.3, 136.7, 133.2, 129.21, 129.15, 128.3, 128.0, 127.4, 126.9, 126.6, 121.7, 119.4, 118.9, 118.7, 114.5, 109.3, 105.8, 55.4, 32.7, 31.7. **HRMS** (EI) calculated for  $\text{C}_{21}\text{H}_{19}\text{NO}$   $[\text{M}]^+$ : 301.1461, found: 301.1465. **IR** (neat):  $\nu$  2930, 1686, 1605, 1503, 1477, 1374, 1325,

1288, 1264, 1230, 1205, 1151, 1117, 1060, 1026, 943, 911, 886, 854, 811, 795, 738, 663, 615, 590, 485, 423 cm<sup>-1</sup>.

**3-(Bicyclo[4.2.0]octa-1,3,5-trien-3-ylmethyl)-1-methyl-1H-indole (3ab)**

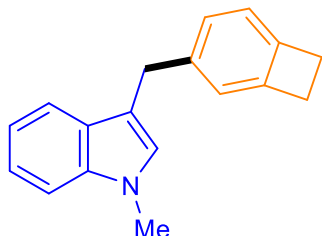

Light red oil (56.7 mg, 77% yield). <sup>1</sup>H NMR (400 MHz, CDCl<sub>3</sub>) δ 7.53 (d, *J* = 8.0 Hz, 1H), 7.27–7.23 (m, 1H), 7.22–7.17 (m, 1H), 7.12 (d, *J* = 7.6 Hz, 1H), 7.06 (m, 1H), 6.98–6.90 (m, 2H), 6.72 (s, 1H), 4.05 (s, 2H), 3.68 (s, 3H), 3.10 (s, 4H). <sup>13</sup>C{<sup>1</sup>H} NMR (100 MHz, CDCl<sub>3</sub>) δ 145.8, 143.2, 140.1, 137.2, 127.9, 127.2, 127.1, 123.0, 122.4, 121.6, 119.3, 118.8, 115.0, 109.2, 32.6, 32.1, 29.5, 29.3. HRMS (DART) calculated for C<sub>18</sub>H<sub>18</sub>N [M+H]<sup>+</sup>: 248.1434, found: 248.1431. IR (neat): ν 2921, 1470, 1422, 1372, 1324, 1249, 1201, 1120, 1057, 1010, 800, 735, 426 cm<sup>-1</sup>.

**3-((9H-Fluoren-3-yl)methyl)-1-methyl-1H-indole (3ac)**

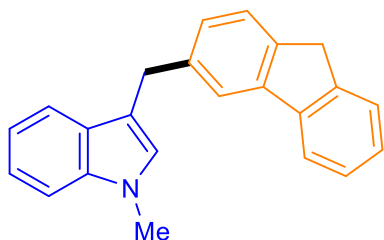

White solid (63.1 mg, 68% yield). Melting point 101.1–102.2 °C. <sup>1</sup>H NMR (400 MHz, CDCl<sub>3</sub>) δ 7.80 (d, *J* = 7.6 Hz, 1H), 7.76 (d, *J* = 8.0 Hz, 1H), 7.63 (d, *J* = 8.0 Hz, 1H), 7.56 (d, *J* = 7.6 Hz, 1H), 7.51 (s, 1H), 7.43 – 7.23 (m, 5H), 7.18 – 7.12 (m, 1H), 6.82 (s, 1H), 4.23 (s, 2H), 3.88 (s, 2H), 3.75 (d, *J* = 1.2 Hz, 3H). <sup>13</sup>C{<sup>1</sup>H} NMR (100 MHz, CDCl<sub>3</sub>) δ 143.6, 143.3, 141.9, 140.3, 139.7, 137.3, 128.0, 127.4, 127.3, 126.8, 126.4, 125.5, 125.1, 121.7, 119.8, 119.7, 119.4, 118.9, 114.6, 109.3, 36.9, 32.7, 31.8. HRMS (DART) calculated for C<sub>23</sub>H<sub>20</sub>N [M+H]<sup>+</sup>: 310.1590, found: 310.1587. IR (neat): ν 3049, 2889, 1613, 1469, 1424, 1372, 1327, 1250, 1195, 1152, 1129, 1059, 1009, 951, 906, 837, 763, 730, 646, 612, 575, 520, 423 cm<sup>-1</sup>.



#### 4-(4-((1-Methyl-1*H*-indol-3-yl)methyl)phenyl)morpholine (3ad)

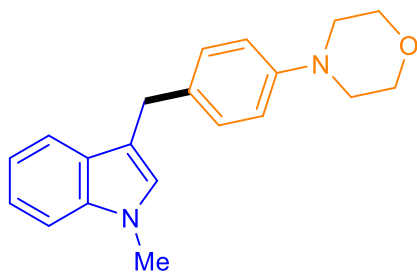

Yellow solid (50.6 mg, 55% yield). Melting point 172.9–174.1 °C. **<sup>1</sup>H NMR** (400 MHz, CDCl<sub>3</sub>) δ 7.55 (d, *J* = 8.0 Hz, 1H), 7.30 (d, *J* = 8.2 Hz, 1H), 7.23 (t, *J* = 8.1 Hz, 3H), 7.09 (t, *J* = 7.4 Hz, 1H), 6.86 (d, *J* = 8.1 Hz, 2H), 6.75 (s, 1H), 4.06 (s, 2H), 3.87 (t, *J* = 4.7 Hz, 4H), 3.73 (s, 3H), 3.13 (t, *J* = 4.8 Hz, 4H). **<sup>13</sup>C{<sup>1</sup>H} NMR** (100 MHz, CDCl<sub>3</sub>) δ 149.51, 137.25, 133.22, 129.46, 127.91, 127.11, 121.60, 119.33, 118.78, 115.99, 114.84, 109.20, 67.07, 49.83, 32.67, 30.69. **HRMS** (ESI) calculated for C<sub>20</sub>H<sub>23</sub>N<sub>2</sub>O [M+H]<sup>+</sup>: 307.1805, found: 307.1809. **IR** (neat): ν 2961, 2823, 1611, 1514, 1477, 1447, 1369, 1326, 1304, 1266, 1227, 1146, 1119, 1052, 1009, 926, 840, 813, 792, 739, 623, 579, 543, 521, 424 cm<sup>-1</sup>.

#### 5-(4-((1-Methyl-1*H*-indol-3-yl)methyl)phenyl)oxazole (3ae)

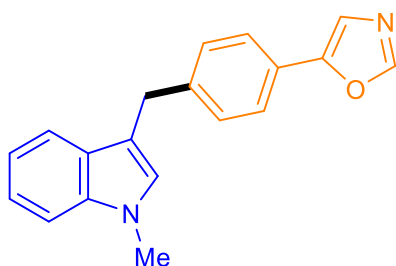

White solid (74.4 mg, 86% yield). Melting point 146.6–148.3 °C. **<sup>1</sup>H NMR** (400 MHz, CDCl<sub>3</sub>) δ 7.90 (s, 1H), 7.59 (d, *J* = 7.6 Hz, 2H), 7.53 (d, *J* = 8.0 Hz, 1H), 7.43–7.29 (m, 4H), 7.26 (t, *J* = 7.6 Hz, 1H), 7.11 (t, *J* = 7.6 Hz, 1H), 6.80 (s, 1H), 4.15 (s, 2H), 3.75 (s, 3H). **<sup>13</sup>C{<sup>1</sup>H} NMR** (100 MHz, CDCl<sub>3</sub>) δ 151.8, 150.3, 142.3, 137.3, 129.3, 127.8, 127.2, 125.5, 124.5, 121.8, 121.0, 119.2, 119.0, 113.7, 109.3, 32.7, 31.5. **HRMS** (ESI) calculated for C<sub>19</sub>H<sub>17</sub>N<sub>2</sub>O [M+H]<sup>+</sup>: 289.1335, found: 289.1344. **IR** (neat): ν 3097, 2910, 1614, 1509, 1480, 1423, 1376, 1325, 1252, 1152, 1101, 1063, 1041, 1012, 940, 918, 871, 819, 781, 731, 681, 648, 567, 524, 496, 448, 423 cm<sup>-1</sup>.

**3-((2,3-Dihydrobenzo[b][1,4]dioxin-6-yl)methyl)-1-methyl-1H-indole (3af)**

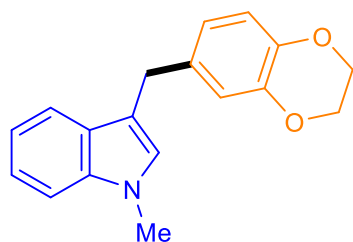

Light yellow oil (48.6 mg, 58% yield).  $^1\text{H NMR}$  (400 MHz,  $\text{CDCl}_3$ )  $\delta$  7.57 (d,  $J = 8.0$  Hz, 1H), 7.32 (d,  $J = 8.0$  Hz, 1H), 7.25 (d,  $J = 8.4$  Hz, 1H), 7.12 (t,  $J = 7.2$  Hz, 1H), 6.84 (s, 1H), 6.82 (s, 3H), 4.25 (s, 4H), 4.04 (s, 2H), 3.76 (s, 3H).  $^{13}\text{C}\{^1\text{H}\}$  NMR (100 MHz,  $\text{CDCl}_3$ )  $\delta$  143.4, 141.7, 137.2, 135.0, 127.9, 127.1, 121.64, 121.62, 119.3, 118.8, 117.4, 117.1, 114.5, 109.2, 64.5, 64.4, 32.7, 30.8. **HRMS** (EI) calculated for  $\text{C}_{18}\text{H}_{17}\text{NO}_2$   $[\text{M}]^+$ : 279.1254, found: 279.1254. **IR** (neat):  $\nu$  2927, 2874, 1684, 1588, 1503, 1469, 1428, 1373, 1281, 1255, 1200, 1122, 1066, 1011, 915, 885, 803, 735, 682, 644, 593, 552, 462, 427  $\text{cm}^{-1}$ .

**3-((2,2-Difluorobenzo[d][1,3]dioxol-5-yl)methyl)-1-methyl-1H-indole (3ag)**

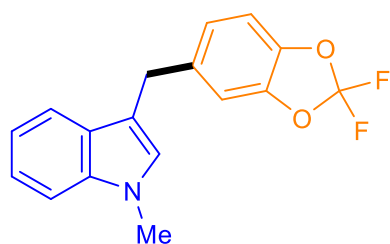

Colorless oil (59.1 mg, 66% yield).  $^1\text{H NMR}$  (400 MHz,  $\text{CDCl}_3$ )  $\delta$  7.44 (d,  $J = 8.0$  Hz, 1H), 7.29–7.27 (m, 1H), 7.23–7.19 (m, 1H), 7.07 (t,  $J = 6.8$  Hz, 1H), 6.98–6.89 (m, 3H), 6.77 (s, 1H), 4.06 (s, 2H), 3.72 (s, 3H).  $^{13}\text{C}\{^1\text{H}\}$  NMR (100 MHz,  $\text{CDCl}_3$ )  $\delta$  143.9, 142.0, 137.8, 137.3, 131.7 (t,  $J = 252$  Hz), 127.6, 127.2, 123.4, 121.9, 119.06, 119.05, 113.5, 109.9, 109.4, 109.0, 32.7, 31.4.  $^{19}\text{F NMR}$  (376 MHz,  $\text{CDCl}_3$ )  $\delta$  -50.1. **HRMS** (EI) calculated for  $\text{C}_{17}\text{H}_{13}\text{F}_2\text{NO}_2$   $[\text{M}]^+$ : 301.0909, found: 301.0911. **IR** (neat):  $\nu$  2913, 1494, 1445, 1229, 1136, 1034, 949, 736, 702, 425  $\text{cm}^{-1}$ .

**9-(4-((1-Methyl-1H-indol-3-yl)methyl)phenyl)-9H-carbazole (3ah)**

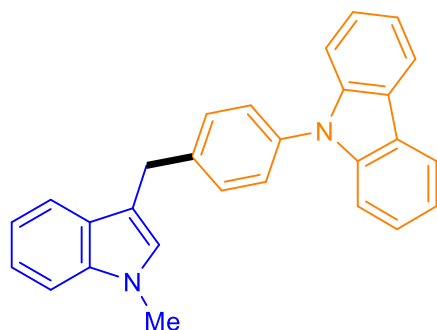

White solid (98.5 mg, 85% yield). Melting point 145–146 °C.  $^1\text{H NMR}$  (400 MHz,  $\text{CDCl}_3$ )  $\delta$  8.12 (d,  $J = 8.0$  Hz, 2H), 7.59 (d,  $J = 8.0$  Hz, 1H), 7.51–7.42 (m, 4H), 7.40–7.37 (m, 4H), 7.34–7.30 (m, 1H), 7.29–7.22 (m, 3H), 7.12 (m, 1H), 6.88 (s, 1H), 4.21 (s, 2H), 3.77 (s, 3H).  $^{13}\text{C}\{^1\text{H}\}$  NMR (100 MHz,  $\text{CDCl}_3$ )  $\delta$  141.03, 140.98, 137.3, 135.4, 130.0, 127.9, 127.3, 127.0, 125.9, 123.3, 121.8, 120.3, 119.8, 119.2, 119.0, 113.8, 109.9, 109.3, 32.7, 31.3. HRMS (ESI) calculated for  $\text{C}_{28}\text{H}_{23}\text{N}_2$   $[\text{M}+\text{H}]^+$ : 387.1856, found: 387.1853. IR (neat):  $\nu$  3047, 2915, 1593, 1512, 1450, 1331, 1313, 1231, 752, 723, 655, 430  $\text{cm}^{-1}$ .

### 3-(Benzofuran-5-ylmethyl)-1-methyl-1H-indole (3ai)

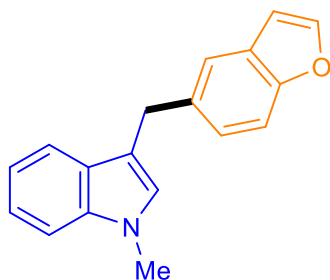

Colorless oil (61.5 mg, 79% yield).  $^1\text{H NMR}$  (400 MHz,  $\text{CDCl}_3$ )  $\delta$  7.54 (d,  $J = 2.4$  Hz, 1H), 7.52 (d,  $J = 8.0$  Hz, 1H), 7.46 (s, 1H), 7.39 (m, 1H), 7.30–7.15 (m, 3H, contains residual solvent signal of  $\text{CDCl}_3$ ), 7.09–7.02 (m, 1H), 6.72 (s, 1H), 6.65 (m, 1H), 4.17 (s, 2H), 3.67 (s, 3H).  $^{13}\text{C}\{^1\text{H}\}$  NMR (100 MHz,  $\text{CDCl}_3$ )  $\delta$  153.7, 145.1, 137.3, 136.0, 127.9, 127.6, 127.2, 125.3, 121.7, 120.8, 119.3, 118.9, 114.9, 111.1, 109.2, 106.6, 32.6, 31.5. HRMS (EI) calculated for  $\text{C}_{18}\text{H}_{15}\text{ON}$   $[\text{M}]^+$ : 261.1148, found: 261.1149. IR (neat):  $\nu$  3049, 2910, 1465, 1372, 1325, 1258, 1192, 1107, 1029, 881, 764, 732, 423  $\text{cm}^{-1}$ .

### 3-(Benzo[b]thiophen-6-ylmethyl)-1-methyl-1H-indole (3aj)

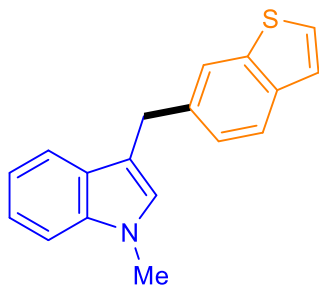

Colorless oil (45.4 mg, 55% yield).  $^1\text{H NMR}$  (400 MHz,  $\text{CDCl}_3$ )  $\delta$  7.73 (s, 1H), 7.69 (d,  $J = 8.0$  Hz, 1H), 7.51 (d,  $J = 8.0$  Hz, 1H), 7.33–7.15 (m, 5H), 7.05 (t,  $J = 7.2$  Hz, 1H), 6.72 (s, 1H), 4.20 (s, 2H), 3.66 (s, 3H).  $^{13}\text{C}\{^1\text{H}\}$  NMR (100 MHz,  $\text{CDCl}_3$ )  $\delta$  140.2, 137.94, 137.90, 137.3, 127.9, 127.4, 125.7, 125.5, 123.7, 123.4, 122.1, 121.7, 119.3, 118.9, 114.3, 109.3, 32.7, 31.6. HRMS (EI) calculated for

C<sub>18</sub>H<sub>15</sub>NS [M]<sup>+</sup>: 277.0920, found: 277.0931. **IR** (neat):  $\nu$  3048, 2905, 1468, 1371, 1323, 1249, 1010, 902, 784, 735, 691, 584, 423 cm<sup>-1</sup>.

**3-(Dibenzo[b,d]thiophen-4-ylmethyl)-1-methyl-1H-indole (3ak)**

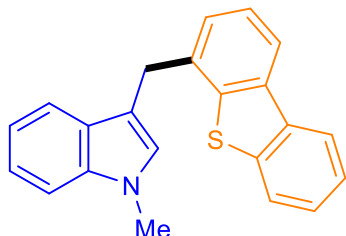

White solid (65.2 mg, 67% yield). Melting point 88–90 °C. **<sup>1</sup>H NMR** (400 MHz, CDCl<sub>3</sub>)  $\delta$  8.22–8.17 (m, 1H), 8.09 (d,  $J$  = 7.6 Hz, 1H), 7.93–7.88 (m, 1H), 7.63 (d,  $J$  = 8.0 Hz, 1H), 7.54–7.47 (m, 2H), 7.47–7.33 (m, 3H), 7.31–7.26 (m, 1H), 7.14 (t,  $J$  = 8.0 Hz, 1H), 6.91 (s, 1H), 4.43 (s, 2H), 3.76 (s, 3H). **<sup>13</sup>C{<sup>1</sup>H} NMR** (100 MHz, CDCl<sub>3</sub>)  $\delta$  139.4, 139.2, 137.2, 136.1, 135.8, 135.7, 128.0, 127.8, 126.8, 126.6, 124.9, 124.4, 122.9, 121.8, 121.7, 119.5, 119.3, 119.0, 111.8, 109.3, 32.7, 30.9. **HRMS** (EI) calculated for C<sub>22</sub>H<sub>17</sub>NS [M]<sup>+</sup>: 327.1076, found: 327.1083. **IR** (neat):  $\nu$  3051, 2921, 1471, 1440, 1323, 1250, 1042, 1011, 748, 728, 565, 425 cm<sup>-1</sup>.

**Methyl 4-((1H-indol-3-yl)methyl)benzoate (3al)**<sup>[1]</sup>

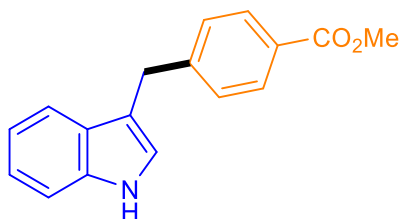

White solid (38.6 mg, 49% yield). **<sup>1</sup>H NMR** (400 MHz, CDCl<sub>3</sub>)  $\delta$  8.05 (br, 1H), 7.94 (d,  $J$  = 8.4 Hz, 2H), 7.45 (d,  $J$  = 8.0 Hz, 1H), 7.37–7.31 (m, 3H), 7.18 (t,  $J$  = 7.6 Hz, 1H), 7.06 (t,  $J$  = 7.6 Hz, 1H), 6.91 (s, 1H), 4.15 (s, 2H), 3.88 (s, 3H). **<sup>13</sup>C{<sup>1</sup>H} NMR** (100 MHz, CDCl<sub>3</sub>)  $\delta$  167.3, 146.9, 136.5, 129.8, 128.7, 127.9, 127.3, 122.5, 122.2, 119.5, 119.0, 114.7, 111.2, 52.0, 31.7.

**Methyl 4-((1-benzyl-1H-indol-3-yl)methyl)benzoate (3am)**

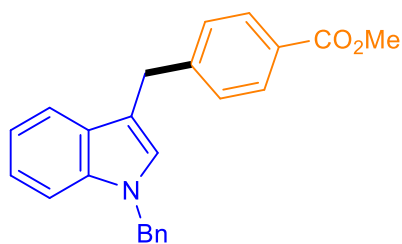

White solid (74.5 mg, 71% yield). Melting point 108–110 °C.  $^1\text{H NMR}$  (400 MHz,  $\text{CDCl}_3$ )  $\delta$  7.94 (d,  $J = 8.0$  Hz, 2H), 7.46 (d,  $J = 8.0$  Hz, 1H), 7.34 (d,  $J = 8.0$  Hz, 2H), 7.29–7.22 (m, 4H, contains residual solvent signal of  $\text{CDCl}_3$ ), 7.16 (t,  $J = 7.6$  Hz, 1H), 7.10–7.02 (m, 3H), 6.86 (s, 1H), 5.25 (s, 2H), 4.15 (s, 2H), 3.88 (s, 3H).  $^{13}\text{C}\{^1\text{H}\}$  NMR (100 MHz,  $\text{CDCl}_3$ )  $\delta$  167.2, 146.9, 137.6, 136.9, 129.8, 128.8, 128.7, 128.0, 127.9, 127.6, 126.8, 126.7, 122.0, 119.3, 113.9, 109.8, 52.0, 50.0, 31.7. HRMS (ESI) calculated for  $\text{C}_{24}\text{H}_{22}\text{NO}_2$   $[\text{M}+\text{H}]^+$ : 356.1645, found: 356.1641. IR (neat):  $\nu$  3026, 2804, 1709, 1608, 1466, 1279, 1175, 1104, 713, 697, 518, 453, 430  $\text{cm}^{-1}$ .

**Methyl 4-((1,2-dimethyl-1H-indol-3-yl)methyl)benzoate (3an)**

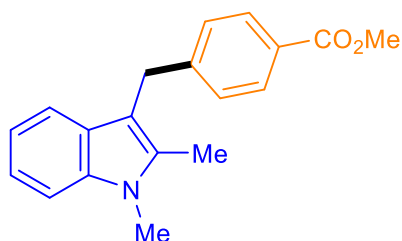

White solid (55.4 mg, 63% yield). Melting point 93–95 °C.  $^1\text{H NMR}$  (400 MHz,  $\text{CDCl}_3$ )  $\delta$  7.89 (d,  $J = 8.4$  Hz, 2H), 7.36 (d,  $J = 8.0$  Hz, 1H), 7.27–7.20 (m, 3H), 7.14 (t,  $J = 8.0$  Hz, 1H), 7.01 (t,  $J = 8.0$  Hz, 1H), 4.12 (s, 2H), 3.85 (s, 3H), 3.65 (s, 3H), 2.33 (s, 3H).  $^{13}\text{C}\{^1\text{H}\}$  NMR (100 MHz,  $\text{CDCl}_3$ )  $\delta$  167.2, 147.6, 136.7, 133.8, 129.7, 128.3, 127.8, 127.7, 120.8, 119.0, 118.1, 108.9, 108.7, 52.0, 30.6, 29.6, 10.4. HRMS (ESI) calculated for  $\text{C}_{19}\text{H}_{20}\text{NO}_2$   $[\text{M}+\text{H}]^+$ : 294.1489, found: 294.1490. IR (neat):  $\nu$  2911, 1709, 1605, 1469, 1427, 1368, 1275, 1175, 1103, 1015, 759, 733, 714  $\text{cm}^{-1}$ .

**Methyl 4-((1-benzyl-2-methyl-1H-indol-3-yl)methyl)benzoate (3ao)<sup>[4]</sup>**

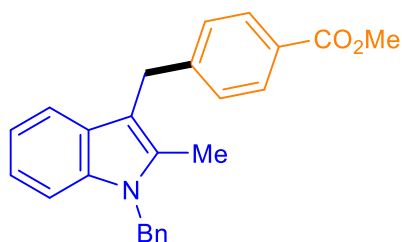

White solid (61.1 mg, 56% yield).  $^1\text{H NMR}$  (400 MHz,  $\text{CDCl}_3$ )  $\delta$  7.91 (d,  $J = 8.0$  Hz, 2H), 7.40 (d,  $J = 7.6$  Hz, 1H), 7.32–7.19 (m, 7H), 7.15–7.08 (m, 1H), 7.04 (m, 1H), 6.96 (d,  $J = 6.8$  Hz, 1H), 5.32 (s, 2H), 4.16 (s, 2H), 3.87 (s, 3H), 2.29 (s, 3H).  $^{13}\text{C}\{^1\text{H}\}$  NMR (100 MHz,  $\text{CDCl}_3$ )  $\delta$  167.2, 147.4, 138.0, 136.6, 133.7, 129.7, 128.8, 128.3, 128.0, 127.8, 127.3, 126.0, 121.1, 119.3, 118.3, 109.7, 109.1, 52.0, 46.6, 30.6, 10.4.

**Methyl 4-((4-chloro-1-methyl-1H-indol-3-yl)methyl)benzoate (3ap)**

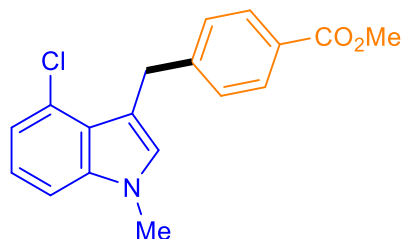

White solid (69.7 mg, 74% yield). Melting point 76–77 °C.  $^1\text{H NMR}$  (400 MHz,  $\text{CDCl}_3$ )  $\delta$  7.94 (d,  $J = 8.4$  Hz, 2H), 7.29 (d,  $J = 8.4$  Hz, 2H), 7.16–7.14 (m, 1H), 7.08–7.01 (m, 2H), 6.62 (s, 1H), 4.40 (s, 2H), 3.88 (s, 3H), 3.66 (s, 3H).  $^{13}\text{C}\{^1\text{H}\}$  NMR (100 MHz,  $\text{CDCl}_3$ )  $\delta$  167.3, 147.6, 138.6, 129.7, 129.0, 128.8, 127.8, 126.5, 124.4, 122.3, 120.1, 113.6, 108.1, 52.0, 32.9, 32.5. HRMS (ESI) calculated for  $\text{C}_{18}\text{H}_{17}\text{NO}_2\text{Cl}$   $[\text{M}+\text{H}]^+$ : 314.0942, found: 314.0939. IR (neat):  $\nu$  2943, 1719, 1608, 1419, 1280, 1174, 1101, 1020, 863, 769, 734, 700  $\text{cm}^{-1}$ .

#### Methyl 4-((1,5-dimethyl-1H-indol-3-yl)methyl)benzoate (3aq)

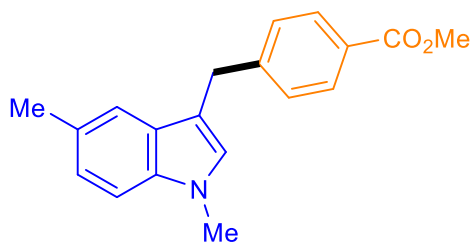

Colorless oil (68.3 mg, 78% yield).  $^1\text{H NMR}$  (400 MHz,  $\text{CDCl}_3$ )  $\delta$  7.94 (d,  $J = 8.0$  Hz, 2H), 7.32 (d,  $J = 8.0$  Hz, 2H), 7.23 (s, 1H), 7.16 (d,  $J = 8.4$  Hz, 1H), 7.03 (d,  $J = 8.4$  Hz, 1H), 6.69 (s, 1H), 4.09 (s, 2H), 3.87 (s, 3H), 3.67 (s, 3H), 2.41 (s, 3H).  $^{13}\text{C}\{^1\text{H}\}$  NMR (100 MHz,  $\text{CDCl}_3$ )  $\delta$  167.3, 147.2, 135.7, 129.8, 128.7, 128.2, 128.0, 127.9, 127.4, 123.4, 118.7, 112.6, 109.0, 52.0, 32.7, 31.6, 21.5. HRMS (ESI) calculated for  $\text{C}_{19}\text{H}_{20}\text{NO}_2$   $[\text{M}+\text{H}]^+$ : 294.1489, found: 294.1489. IR (neat):  $\nu$  2913, 1714, 1608, 1491, 1432, 1377, 1274, 1175, 1103, 1018, 784, 714, 605, 426  $\text{cm}^{-1}$ .

#### Methyl 4-((5-fluoro-1-methyl-1H-indol-3-yl)methyl)benzoate (3ar)

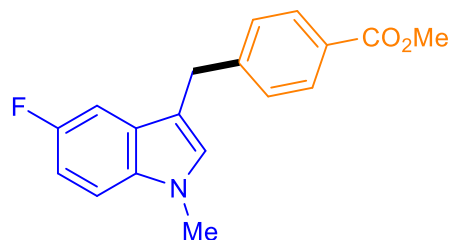

White solid (21.6 mg, 24% yield). Melting point 98–99 °C.  $^1\text{H NMR}$  (400 MHz,  $\text{CDCl}_3$ )  $\delta$  7.95 (d,  $J = 8.4$  Hz, 2H), 7.32 (d,  $J = 8.4$  Hz, 2H), 7.19 (m, 1H), 7.07 (dd,  $J = 9.6, 2.4$  Hz, 1H), 6.95 (td,  $J = 9.2, 2.4$  Hz, 1H), 6.81 (s, 1H), 4.08 (s, 2H), 3.89 (s, 3H), 3.72 (s, 3H).  $^{13}\text{C}\{^1\text{H}\}$  NMR (100 MHz,

CDCl<sub>3</sub>)  $\delta$  167.1, 157.6 (d,  $J = 233.0$  Hz), 146.6, 133.9, 129.8, 128.9, 128.6, 128.0, 127.9 (d,  $J = 9.0$  Hz), 113.2 (d,  $J = 5.0$  Hz), 110.1 (d,  $J = 35.0$  Hz), 110.0, 103.9 (d,  $J = 23.0$  Hz), 52.0, 32.9, 31.6. **<sup>19</sup>F NMR** (376 MHz, CDCl<sub>3</sub>)  $\delta$  -125.5. **HRMS** (ESI) calculated for C<sub>18</sub>H<sub>17</sub>NO<sub>2</sub>F [M+H]<sup>+</sup>: 298.1238, found: 298.1240. **IR** (neat):  $\nu$  2921, 1713, 1610, 1573, 1486, 1425, 1278, 1246, 1108, 900, 744, 429 cm<sup>-1</sup>.

**Methyl 4-((5-methoxy-1-methyl-1*H*-indol-3-yl)methyl)benzoate (3as)**

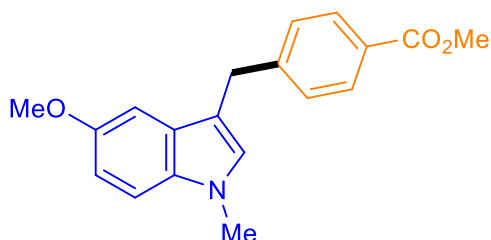

White solid (65.0 mg, 71% yield). Melting point 96–98 °C. **<sup>1</sup>H NMR** (400 MHz, CDCl<sub>3</sub>)  $\delta$  7.94 (d,  $J = 8.4$  Hz, 2H), 7.34 (d,  $J = 8.4$  Hz, 2H), 7.22–7.15 (m, 1H), 6.91–6.85 (m, 2H), 6.72 (s, 1H), 4.10 (s, 2H), 3.89 (s, 3H), 3.79 (s, 3H), 3.70 (s, 3H). **<sup>13</sup>C{<sup>1</sup>H} NMR** (100 MHz, CDCl<sub>3</sub>)  $\delta$  167.2, 153.8, 147.0, 132.6, 129.7, 128.7, 128.0, 127.9, 112.6, 111.8, 110.04, 110.00, 101.0, 56.0, 52.0, 32.8, 31.7. **HRMS** (ESI) calculated for C<sub>19</sub>H<sub>20</sub>NO<sub>3</sub> [M+H]<sup>+</sup>: 310.1438, found: 310.1432. **IR** (neat):  $\nu$  2915, 1708, 1610, 1460, 1423, 1282, 1256, 1225, 1107, 1054, 1027, 891, 827, 744 cm<sup>-1</sup>.

**Methyl 4-((1-(4-chlorobenzoyl)-5-methoxy-2-methyl-1*H*-indol-3-yl)methyl)benzoate (3at)**

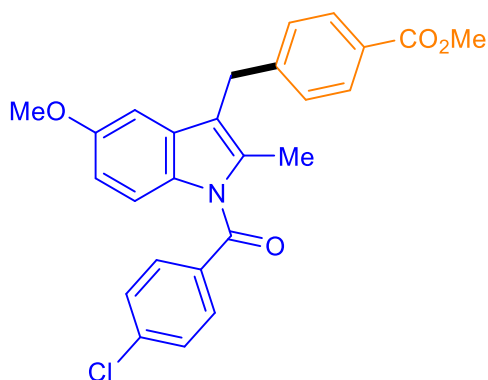

White solid (67.2 mg, 50% yield). Melting point 143–144 °C. **<sup>1</sup>H NMR** (400 MHz, CDCl<sub>3</sub>)  $\delta$  7.94 (d,  $J = 8.4$  Hz, 2H), 7.67 (d,  $J = 8.4$  Hz, 2H), 7.48 (d,  $J = 8.0$  Hz, 2H), 7.28 (d,  $J = 8.0$  Hz, 2H), 6.88 (d,  $J = 8.8$  Hz, 1H), 6.74 (s, 1H), 6.65 (m, 1H), 4.08 (s, 2H), 3.89 (s, 3H), 3.73 (s, 3H), 2.38 (s, 3H). **<sup>13</sup>C{<sup>1</sup>H} NMR** (100 MHz, CDCl<sub>3</sub>)  $\delta$  168.4, 167.0, 155.9, 145.3, 139.2, 135.3, 134.1, 131.2, 131.1, 131.0, 129.9, 129.2, 128.26, 128.23, 117.4, 115.0, 111.3, 101.7, 55.7, 52.1, 30.1, 13.4. **HRMS** (ESI)

calculated for  $C_{26}H_{23}NO_4Cl$   $[M+H]^+$ : 448.1310, found: 448.1302. **IR** (neat):  $\nu$  3392, 2954, 2848, 1722, 1669, 1474, 1397, 1314, 1270, 1225, 1174, 1103, 1082, 1064, 804, 703, 651, 475  $cm^{-1}$ .

## 7. Unsuccessful substrates

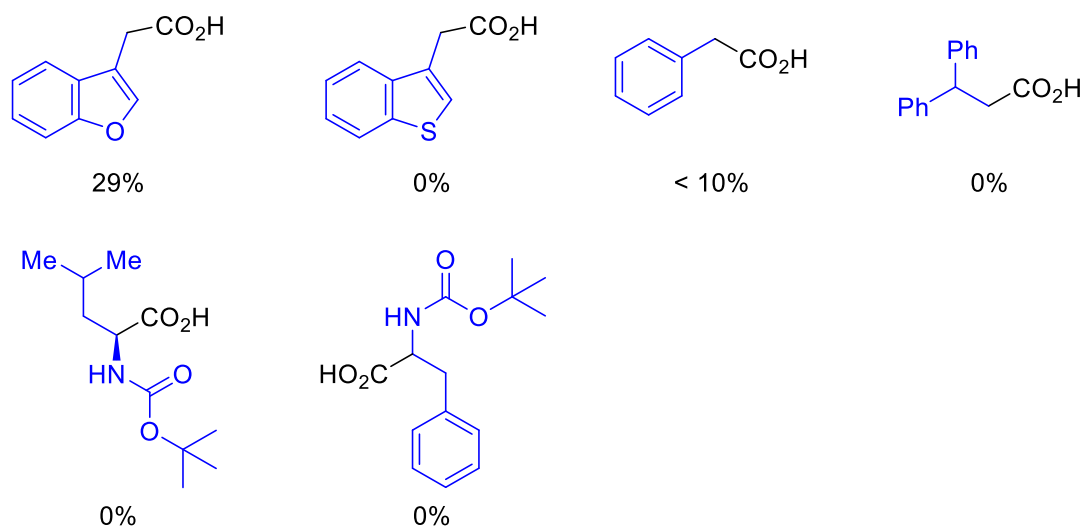

**Scheme S1.** Unsuccessful aliphatic carboxylic acids.



## 8. Crystallographic Data of Compound 3o

**Table 1.** Crystal data and structure refinement for **3o**.

|                                   |                                                                         |
|-----------------------------------|-------------------------------------------------------------------------|
| Identification code               | d8v211031                                                               |
| Empirical formula                 | C <sub>19</sub> H <sub>19</sub> N                                       |
| Formula weight                    | 261.35                                                                  |
| Temperature                       | 213(2) K                                                                |
| Wavelength                        | 0.71073 Å                                                               |
| Crystal system                    | Orthorhombic                                                            |
| Space group                       | P b c a                                                                 |
| Unit cell dimensions              | a = 8.3081(5) Å = 90°<br>b = 7.9162(5) Å = 90°<br>c = 44.227(2) Å = 90° |
| Volume                            | 2908.7(3) Å <sup>3</sup>                                                |
| Z                                 | 8                                                                       |
| Density (calculated)              | 1.194 Mg/m <sup>3</sup>                                                 |
| Absorption coefficient            | 0.069 mm <sup>-1</sup>                                                  |
| F(000)                            | 1120                                                                    |
| Crystal size                      | 0.200 x 0.150 x 0.120 mm <sup>3</sup>                                   |
| Theta range for data collection   | 2.619 to 25.999 °                                                       |
| Index ranges                      | -10<=h<=9, -9<=k<=7, -54<=l<=54                                         |
| Reflections collected             | 13191                                                                   |
| Independent reflections           | 2834 [R(int) = 0.0368]                                                  |
| Completeness to theta = 25.242 °  | 99.4 %                                                                  |
| Absorption correction             | Semi-empirical from equivalents                                         |
| Max. and min. transmission        | 0.7456 and 0.6362                                                       |
| Refinement method                 | Full-matrix least-squares on F <sup>2</sup>                             |
| Data / restraints / parameters    | 2834 / 0 / 183                                                          |
| Goodness-of-fit on F <sup>2</sup> | 1.042                                                                   |
| Final R indices [I>2sigma(I)]     | R1 = 0.0439, wR2 = 0.1058                                               |
| R indices (all data)              | R1 = 0.0566, wR2 = 0.1159                                               |
| Extinction coefficient            | 0.018(3)                                                                |
| Largest diff. peak and hole       | 0.191 and -0.156 e.Å <sup>-3</sup>                                      |

**Table 2.** Atomic coordinates ( $\times 10^4$ ) and equivalent isotropic displacement parameters ( $\text{\AA}^2 \times 10^3$ )

for d8v211031.  $U(\text{eq})$  is defined as one third of the trace of the orthogonalized  $U^{ij}$  tensor.

|       | x       | y        | z       | $U(\text{eq})$ |
|-------|---------|----------|---------|----------------|
| N(1)  | 4347(2) | -35(2)   | 4190(1) | 43(1)          |
| C(1)  | 4925(2) | 1248(2)  | 4370(1) | 36(1)          |
| C(2)  | 4756(2) | 1510(2)  | 4678(1) | 50(1)          |
| C(3)  | 5480(2) | 2928(3)  | 4798(1) | 58(1)          |
| C(4)  | 6345(2) | 4054(2)  | 4618(1) | 56(1)          |
| C(5)  | 6497(2) | 3793(2)  | 4311(1) | 43(1)          |
| C(6)  | 5778(2) | 2370(2)  | 4182(1) | 34(1)          |
| C(7)  | 5696(2) | 1716(2)  | 3880(1) | 34(1)          |
| C(8)  | 4828(2) | 261(2)   | 3898(1) | 40(1)          |
| C(9)  | 3503(3) | -1525(2) | 4295(1) | 72(1)          |
| C(10) | 6462(2) | 2418(2)  | 3601(1) | 40(1)          |
| C(11) | 5644(2) | 3919(2)  | 3454(1) | 30(1)          |
| C(12) | 4514(2) | 4923(2)  | 3599(1) | 32(1)          |
| C(13) | 3825(2) | 6296(2)  | 3455(1) | 31(1)          |
| C(14) | 4249(2) | 6740(2)  | 3161(1) | 30(1)          |
| C(15) | 5374(2) | 5730(2)  | 3015(1) | 35(1)          |
| C(16) | 6042(2) | 4344(2)  | 3158(1) | 34(1)          |
| C(17) | 3476(2) | 8236(2)  | 3019(1) | 36(1)          |
| C(18) | 4441(2) | 9562(2)  | 2858(1) | 54(1)          |
| C(19) | 3353(2) | 8455(2)  | 2684(1) | 56(1)          |

**Table 3.** Bond lengths [Å] and angles [°] for d8v211031.

---

|              |            |
|--------------|------------|
| N(1)-C(8)    | 1.3688(19) |
| N(1)-C(1)    | 1.3779(19) |
| N(1)-C(9)    | 1.449(2)   |
| C(1)-C(2)    | 1.385(2)   |
| C(1)-C(6)    | 1.4069(19) |
| C(2)-C(3)    | 1.379(3)   |
| C(2)-H(2)    | 0.9400     |
| C(3)-C(4)    | 1.395(3)   |
| C(3)-H(3)    | 0.9400     |
| C(4)-C(5)    | 1.380(2)   |
| C(4)-H(4)    | 0.9400     |
| C(5)-C(6)    | 1.395(2)   |
| C(5)-H(5)    | 0.9400     |
| C(6)-C(7)    | 1.4342(19) |
| C(7)-C(8)    | 1.361(2)   |
| C(7)-C(10)   | 1.4970(19) |
| C(8)-H(8)    | 0.9400     |
| C(9)-H(9A)   | 0.9700     |
| C(9)-H(9B)   | 0.9700     |
| C(9)-H(9C)   | 0.9700     |
| C(10)-C(11)  | 1.5151(19) |
| C(10)-H(10A) | 0.9800     |
| C(10)-H(10B) | 0.9800     |
| C(11)-C(12)  | 1.3874(18) |
| C(11)-C(16)  | 1.3905(19) |
| C(12)-C(13)  | 1.3840(19) |
| C(12)-H(12)  | 0.9400     |
| C(13)-C(14)  | 1.3907(18) |
| C(13)-H(13)  | 0.9400     |
| C(14)-C(15)  | 1.3895(19) |
| C(14)-C(17)  | 1.4870(19) |
| C(15)-C(16)  | 1.383(2)   |
| C(15)-H(15)  | 0.9400     |
| C(16)-H(16)  | 0.9400     |
| C(17)-C(19)  | 1.495(2)   |
| C(17)-C(18)  | 1.500(2)   |

|                  |            |
|------------------|------------|
| C(17)-H(17)      | 0.9900     |
| C(18)-C(19)      | 1.477(3)   |
| C(18)-H(18A)     | 0.9800     |
| C(18)-H(18B)     | 0.9800     |
| C(19)-H(19A)     | 0.9800     |
| C(19)-H(19B)     | 0.9800     |
|                  |            |
| C(8)-N(1)-C(1)   | 108.45(12) |
| C(8)-N(1)-C(9)   | 125.67(15) |
| C(1)-N(1)-C(9)   | 125.66(14) |
| N(1)-C(1)-C(2)   | 130.08(14) |
| N(1)-C(1)-C(6)   | 107.42(13) |
| C(2)-C(1)-C(6)   | 122.49(15) |
| C(3)-C(2)-C(1)   | 117.03(15) |
| C(3)-C(2)-H(2)   | 121.5      |
| C(1)-C(2)-H(2)   | 121.5      |
| C(2)-C(3)-C(4)   | 121.75(15) |
| C(2)-C(3)-H(3)   | 119.1      |
| C(4)-C(3)-H(3)   | 119.1      |
| C(5)-C(4)-C(3)   | 120.88(16) |
| C(5)-C(4)-H(4)   | 119.6      |
| C(3)-C(4)-H(4)   | 119.6      |
| C(4)-C(5)-C(6)   | 118.82(15) |
| C(4)-C(5)-H(5)   | 120.6      |
| C(6)-C(5)-H(5)   | 120.6      |
| C(5)-C(6)-C(1)   | 119.03(13) |
| C(5)-C(6)-C(7)   | 133.65(13) |
| C(1)-C(6)-C(7)   | 107.32(13) |
| C(8)-C(7)-C(6)   | 106.00(12) |
| C(8)-C(7)-C(10)  | 126.02(14) |
| C(6)-C(7)-C(10)  | 127.92(13) |
| C(7)-C(8)-N(1)   | 110.81(13) |
| C(7)-C(8)-H(8)   | 124.6      |
| N(1)-C(8)-H(8)   | 124.6      |
| N(1)-C(9)-H(9A)  | 109.5      |
| N(1)-C(9)-H(9B)  | 109.5      |
| H(9A)-C(9)-H(9B) | 109.5      |
| N(1)-C(9)-H(9C)  | 109.5      |

|                     |            |
|---------------------|------------|
| H(9A)-C(9)-H(9C)    | 109.5      |
| H(9B)-C(9)-H(9C)    | 109.5      |
| C(7)-C(10)-C(11)    | 117.04(12) |
| C(7)-C(10)-H(10A)   | 108.0      |
| C(11)-C(10)-H(10A)  | 108.0      |
| C(7)-C(10)-H(10B)   | 108.0      |
| C(11)-C(10)-H(10B)  | 108.0      |
| H(10A)-C(10)-H(10B) | 107.3      |
| C(12)-C(11)-C(16)   | 117.24(12) |
| C(12)-C(11)-C(10)   | 123.67(12) |
| C(16)-C(11)-C(10)   | 119.09(12) |
| C(13)-C(12)-C(11)   | 121.08(12) |
| C(13)-C(12)-H(12)   | 119.5      |
| C(11)-C(12)-H(12)   | 119.5      |
| C(12)-C(13)-C(14)   | 121.60(12) |
| C(12)-C(13)-H(13)   | 119.2      |
| C(14)-C(13)-H(13)   | 119.2      |
| C(15)-C(14)-C(13)   | 117.38(12) |
| C(15)-C(14)-C(17)   | 123.48(12) |
| C(13)-C(14)-C(17)   | 119.13(12) |
| C(16)-C(15)-C(14)   | 120.86(12) |
| C(16)-C(15)-H(15)   | 119.6      |
| C(14)-C(15)-H(15)   | 119.6      |
| C(15)-C(16)-C(11)   | 121.82(13) |
| C(15)-C(16)-H(16)   | 119.1      |
| C(11)-C(16)-H(16)   | 119.1      |
| C(14)-C(17)-C(19)   | 122.76(13) |
| C(14)-C(17)-C(18)   | 121.83(13) |
| C(19)-C(17)-C(18)   | 59.08(11)  |
| C(14)-C(17)-H(17)   | 114.1      |
| C(19)-C(17)-H(17)   | 114.1      |
| C(18)-C(17)-H(17)   | 114.1      |
| C(19)-C(18)-C(17)   | 60.30(11)  |
| C(19)-C(18)-H(18A)  | 117.7      |
| C(17)-C(18)-H(18A)  | 117.7      |
| C(19)-C(18)-H(18B)  | 117.7      |
| C(17)-C(18)-H(18B)  | 117.7      |
| H(18A)-C(18)-H(18B) | 114.9      |

|                     |           |
|---------------------|-----------|
| C(18)-C(19)-C(17)   | 60.62(10) |
| C(18)-C(19)-H(19A)  | 117.7     |
| C(17)-C(19)-H(19A)  | 117.7     |
| C(18)-C(19)-H(19B)  | 117.7     |
| C(17)-C(19)-H(19B)  | 117.7     |
| H(19A)-C(19)-H(19B) | 114.8     |

---

Symmetry transformations used to generate equivalent atoms:

**Table 4.** Anisotropic displacement parameters ( $\text{\AA}^2 \times 10^3$ ) for d8v211031. The anisotropic displacement factor exponent takes the form:  $-2 \left[ h^2 a^{*2} U^{11} + \dots + 2 h k a^* b^* U^{12} \right]$

|       | U <sup>11</sup> | U <sup>22</sup> | U <sup>33</sup> | U <sup>23</sup> | U <sup>13</sup> | U <sup>12</sup> |
|-------|-----------------|-----------------|-----------------|-----------------|-----------------|-----------------|
| N(1)  | 40(1)           | 35(1)           | 52(1)           | 12(1)           | -5(1)           | -7(1)           |
| C(1)  | 31(1)           | 38(1)           | 40(1)           | 10(1)           | -2(1)           | 5(1)            |
| C(2)  | 46(1)           | 60(1)           | 43(1)           | 17(1)           | 5(1)            | 12(1)           |
| C(3)  | 65(1)           | 74(1)           | 34(1)           | -4(1)           | 0(1)            | 19(1)           |
| C(4)  | 59(1)           | 55(1)           | 54(1)           | -15(1)          | -6(1)           | 1(1)            |
| C(5)  | 41(1)           | 41(1)           | 48(1)           | -3(1)           | 0(1)            | -3(1)           |
| C(6)  | 29(1)           | 32(1)           | 39(1)           | 4(1)            | -1(1)           | 3(1)            |
| C(7)  | 33(1)           | 31(1)           | 37(1)           | 5(1)            | -2(1)           | 4(1)            |
| C(8)  | 42(1)           | 36(1)           | 43(1)           | 2(1)            | -11(1)          | 0(1)            |
| C(9)  | 75(1)           | 57(1)           | 84(1)           | 25(1)           | -8(1)           | -29(1)          |
| C(10) | 41(1)           | 40(1)           | 39(1)           | 5(1)            | 6(1)            | 10(1)           |
| C(11) | 29(1)           | 30(1)           | 31(1)           | 0(1)            | 0(1)            | -1(1)           |
| C(12) | 35(1)           | 34(1)           | 27(1)           | 1(1)            | 4(1)            | 0(1)            |
| C(13) | 33(1)           | 31(1)           | 30(1)           | -3(1)           | 5(1)            | 1(1)            |
| C(14) | 30(1)           | 29(1)           | 31(1)           | 0(1)            | 1(1)            | -2(1)           |
| C(15) | 37(1)           | 38(1)           | 29(1)           | 2(1)            | 6(1)            | 0(1)            |
| C(16) | 33(1)           | 36(1)           | 34(1)           | -2(1)           | 7(1)            | 4(1)            |
| C(17) | 38(1)           | 36(1)           | 35(1)           | 6(1)            | 4(1)            | 4(1)            |
| C(18) | 48(1)           | 47(1)           | 69(1)           | 25(1)           | 8(1)            | 5(1)            |
| C(19) | 67(1)           | 61(1)           | 40(1)           | 10(1)           | -5(1)           | 18(1)           |

**Table 5.** Hydrogen coordinates ( $\times 10^4$ ) and isotropic displacement parameters ( $\text{\AA}^2 \times 10^3$ ) for d8v211031.

|        | x    | y     | z    | U(eq) |
|--------|------|-------|------|-------|
| H(2)   | 4172 | 755   | 4800 | 59    |
| H(3)   | 5389 | 3141  | 5006 | 69    |
| H(4)   | 6832 | 5004  | 4707 | 67    |
| H(5)   | 7074 | 4559  | 4190 | 52    |
| H(8)   | 4591 | -445  | 3733 | 48    |
| H(9A)  | 3015 | -2099 | 4124 | 108   |
| H(9B)  | 2672 | -1195 | 4437 | 108   |
| H(9C)  | 4258 | -2279 | 4394 | 108   |
| H(10A) | 6525 | 1509  | 3451 | 48    |
| H(10B) | 7567 | 2746  | 3651 | 48    |
| H(12)  | 4212 | 4667  | 3799 | 39    |
| H(13)  | 3050 | 6943  | 3558 | 37    |
| H(15)  | 5685 | 5992  | 2816 | 42    |
| H(16)  | 6787 | 3671  | 3053 | 41    |
| H(17)  | 2543 | 8684  | 3133 | 44    |
| H(18A) | 4122 | 10744 | 2886 | 65    |
| H(18B) | 5602 | 9377  | 2838 | 65    |
| H(19A) | 3842 | 7587  | 2556 | 68    |
| H(19B) | 2362 | 8953  | 2604 | 68    |



**Table 6.** Torsion angles [°] for d8v211031.

---

|                         |             |
|-------------------------|-------------|
| C(8)-N(1)-C(1)-C(2)     | 179.85(15)  |
| C(9)-N(1)-C(1)-C(2)     | -5.4(3)     |
| C(8)-N(1)-C(1)-C(6)     | 0.40(15)    |
| C(9)-N(1)-C(1)-C(6)     | 175.14(15)  |
| N(1)-C(1)-C(2)-C(3)     | 179.94(15)  |
| C(6)-C(1)-C(2)-C(3)     | -0.7(2)     |
| C(1)-C(2)-C(3)-C(4)     | 0.1(2)      |
| C(2)-C(3)-C(4)-C(5)     | 0.5(3)      |
| C(3)-C(4)-C(5)-C(6)     | -0.5(2)     |
| C(4)-C(5)-C(6)-C(1)     | -0.1(2)     |
| C(4)-C(5)-C(6)-C(7)     | -179.75(15) |
| N(1)-C(1)-C(6)-C(5)     | -179.79(13) |
| C(2)-C(1)-C(6)-C(5)     | 0.7(2)      |
| N(1)-C(1)-C(6)-C(7)     | -0.06(15)   |
| C(2)-C(1)-C(6)-C(7)     | -179.56(13) |
| C(5)-C(6)-C(7)-C(8)     | 179.37(15)  |
| C(1)-C(6)-C(7)-C(8)     | -0.30(15)   |
| C(5)-C(6)-C(7)-C(10)    | 2.0(3)      |
| C(1)-C(6)-C(7)-C(10)    | -177.70(13) |
| C(6)-C(7)-C(8)-N(1)     | 0.56(16)    |
| C(10)-C(7)-C(8)-N(1)    | 178.02(13)  |
| C(1)-N(1)-C(8)-C(7)     | -0.62(17)   |
| C(9)-N(1)-C(8)-C(7)     | -175.35(15) |
| C(8)-C(7)-C(10)-C(11)   | 104.81(17)  |
| C(6)-C(7)-C(10)-C(11)   | -78.29(19)  |
| C(7)-C(10)-C(11)-C(12)  | 17.0(2)     |
| C(7)-C(10)-C(11)-C(16)  | -163.58(13) |
| C(16)-C(11)-C(12)-C(13) | -0.4(2)     |
| C(10)-C(11)-C(12)-C(13) | 179.01(13)  |
| C(11)-C(12)-C(13)-C(14) | -1.0(2)     |
| C(12)-C(13)-C(14)-C(15) | 1.3(2)      |
| C(12)-C(13)-C(14)-C(17) | -179.50(12) |
| C(13)-C(14)-C(15)-C(16) | -0.2(2)     |
| C(17)-C(14)-C(15)-C(16) | -179.45(13) |
| C(14)-C(15)-C(16)-C(11) | -1.1(2)     |
| C(12)-C(11)-C(16)-C(15) | 1.4(2)      |

|                         |             |
|-------------------------|-------------|
| C(10)-C(11)-C(16)-C(15) | -178.02(13) |
| C(15)-C(14)-C(17)-C(19) | 22.7(2)     |
| C(13)-C(14)-C(17)-C(19) | -156.48(15) |
| C(15)-C(14)-C(17)-C(18) | -48.6(2)    |
| C(13)-C(14)-C(17)-C(18) | 132.16(15)  |
| C(14)-C(17)-C(18)-C(19) | 111.75(16)  |
| C(14)-C(17)-C(19)-C(18) | -110.23(16) |

---

Symmetry transformations used to generate equivalent atoms:

**Table 7.** Hydrogen bonds for d8v211031 [ $\text{\AA}$  and  $^\circ$ ].

---

| D-H...A | d(D-H) | d(H...A) | d(D...A) | $\angle(\text{DHA})$ |
|---------|--------|----------|----------|----------------------|
|---------|--------|----------|----------|----------------------|

---

## 9. Crystallographic Data of Compound 3ae

**Table 1.** Crystal data and structure refinement for **3ae**.

|                                   |                                                                                    |
|-----------------------------------|------------------------------------------------------------------------------------|
| Identification code               | mo_d8v211027_0m                                                                    |
| Empirical formula                 | C <sub>19</sub> H <sub>16</sub> N <sub>2</sub> O                                   |
| Formula weight                    | 288.34                                                                             |
| Temperature                       | 213(2) K                                                                           |
| Wavelength                        | 0.71073 Å                                                                          |
| Crystal system                    | Monoclinic                                                                         |
| Space group                       | P 21                                                                               |
| Unit cell dimensions              | a = 25.192(2) Å = 90°.<br>b = 5.6061(5) Å = 110.115(3)°.<br>c = 33.579(3) Å = 90°. |
| Volume                            | 4453.1(7) Å <sup>3</sup>                                                           |
| Z                                 | 12                                                                                 |
| Density (calculated)              | 1.290 Mg/m <sup>3</sup>                                                            |
| Absorption coefficient            | 0.081 mm <sup>-1</sup>                                                             |
| F(000)                            | 1824                                                                               |
| Crystal size                      | 0.200 x 0.150 x 0.120 mm <sup>3</sup>                                              |
| Theta range for data collection   | 1.830 to 26.000 °                                                                  |
| Index ranges                      | -31<=h<=30, -6<=k<=6, -41<=l<=41                                                   |
| Reflections collected             | 75235                                                                              |
| Independent reflections           | 17400 [R(int) = 0.0491]                                                            |
| Completeness to theta = 25.242 °  | 99.6 %                                                                             |
| Absorption correction             | Semi-empirical from equivalents                                                    |
| Max. and min. transmission        | 0.7456 and 0.6865                                                                  |
| Refinement method                 | Full-matrix least-squares on F <sup>2</sup>                                        |
| Data / restraints / parameters    | 17400 / 1 / 1195                                                                   |
| Goodness-of-fit on F <sup>2</sup> | 1.043                                                                              |
| Final R indices [I>2sigma(I)]     | R1 = 0.0446, wR2 = 0.0950                                                          |
| R indices (all data)              | R1 = 0.0673, wR2 = 0.1086                                                          |
| Absolute structure parameter      | -0.6(8)                                                                            |
| Extinction coefficient            | n/a                                                                                |
| Largest diff. peak and hole       | 0.155 and -0.180 e.Å <sup>-3</sup>                                                 |

**Table 2.** Atomic coordinates ( $\times 10^4$ ) and equivalent isotropic displacement parameters ( $\text{\AA}^2 \times 10^3$ )

for mo\_d8v211027\_0m.  $U(\text{eq})$  is defined as one third of the trace of the orthogonalized  $U^{ij}$  tensor.

|       | x       | y        | z        | U(eq) |
|-------|---------|----------|----------|-------|
| O(1)  | 6957(1) | 640(6)   | 2472(1)  | 46(1) |
| O(1A) | 9621(1) | 10931(6) | 9120(1)  | 49(1) |
| O(1B) | 482(1)  | 768(6)   | 5851(1)  | 50(1) |
| O(1C) | 6318(1) | 10874(6) | 5871(1)  | 44(1) |
| O(1D) | 6156(1) | 5687(6)  | 10726(1) | 47(1) |
| O(1E) | 7233(1) | 5821(6)  | 7593(1)  | 48(1) |
| N(1)  | 6929(1) | 3679(9)  | 2046(1)  | 52(1) |
| N(2)  | 8705(1) | 6030(7)  | 5306(1)  | 43(1) |
| N(1A) | 9608(1) | 8003(9)  | 9558(1)  | 60(1) |
| N(2A) | 8050(1) | 5287(8)  | 6302(1)  | 48(1) |
| N(1B) | 436(1)  | 3883(9)  | 5436(1)  | 55(1) |
| N(2B) | 2128(1) | 6076(8)  | 8693(1)  | 48(1) |
| N(1C) | 6386(1) | 7739(9)  | 6290(1)  | 53(1) |
| N(2C) | 4531(1) | 5749(7)  | 3034(1)  | 40(1) |
| N(1D) | 6132(1) | 8640(9)  | 11160(1) | 54(1) |
| N(2D) | 4720(1) | 11506(7) | 7908(1)  | 39(1) |
| N(1E) | 7236(1) | 2821(10) | 7167(1)  | 56(1) |
| N(2E) | 8699(1) | 207(8)   | 10418(1) | 49(1) |
| C(1)  | 6805(2) | 1501(11) | 2073(1)  | 51(1) |
| C(2)  | 7186(1) | 4366(9)  | 2465(1)  | 45(1) |
| C(3)  | 7209(1) | 2544(8)  | 2725(1)  | 32(1) |
| C(4)  | 7426(1) | 2198(7)  | 3179(1)  | 32(1) |
| C(5)  | 7780(1) | 3893(8)  | 3444(1)  | 36(1) |
| C(6)  | 7993(1) | 3586(8)  | 3876(1)  | 37(1) |
| C(7)  | 7862(1) | 1572(8)  | 4064(1)  | 37(1) |
| C(8)  | 7504(1) | -114(8)  | 3801(1)  | 41(1) |
| C(9)  | 7290(1) | 180(8)   | 3368(1)  | 38(1) |
| C(10) | 8114(2) | 1117(9)  | 4535(1)  | 48(1) |
| C(11) | 8239(1) | 3256(9)  | 4820(1)  | 43(1) |
| C(12) | 8756(1) | 4060(9)  | 5068(1)  | 46(1) |

|        |         |           |         |       |
|--------|---------|-----------|---------|-------|
| C(13)  | 8135(1) | 6437(8)   | 5210(1) | 37(1) |
| C(14)  | 7869(1) | 8242(9)   | 5365(1) | 45(1) |
| C(15)  | 7287(2) | 8337(10)  | 5200(1) | 51(1) |
| C(16)  | 6977(1) | 6714(10)  | 4894(1) | 52(1) |
| C(17)  | 7244(1) | 4922(10)  | 4749(1) | 45(1) |
| C(18)  | 7833(1) | 4786(8)   | 4904(1) | 37(1) |
| C(19)  | 9162(1) | 7449(11)  | 5586(1) | 61(1) |
| C(1A)  | 9746(2) | 10145(10) | 9524(1) | 54(1) |
| C(2A)  | 9368(2) | 7234(10)  | 9137(1) | 54(1) |
| C(3A)  | 9374(1) | 8992(8)   | 8867(1) | 38(1) |
| C(4A)  | 9189(1) | 9306(8)   | 8413(1) | 35(1) |
| C(5A)  | 8857(1) | 7534(8)   | 8151(1) | 38(1) |
| C(6A)  | 8668(1) | 7801(8)   | 7715(1) | 41(1) |
| C(7A)  | 8802(1) | 9837(8)   | 7529(1) | 40(1) |
| C(8A)  | 9138(1) | 11540(9)  | 7792(1) | 45(1) |
| C(9A)  | 9327(1) | 11296(8)  | 8226(1) | 42(1) |
| C(10A) | 8568(2) | 10290(10) | 7057(1) | 52(1) |
| C(11A) | 8472(1) | 8149(9)   | 6777(1) | 41(1) |
| C(12A) | 7969(2) | 7190(9)   | 6526(1) | 48(1) |
| C(13A) | 8619(1) | 4888(8)   | 6406(1) | 37(1) |
| C(14A) | 8914(2) | 3183(9)   | 6271(1) | 47(1) |
| C(15A) | 9489(2) | 3204(9)   | 6444(1) | 51(1) |
| C(16A) | 9780(1) | 4892(10)  | 6747(1) | 50(1) |
| C(17A) | 9492(1) | 6632(10)  | 6878(1) | 43(1) |
| C(18A) | 8898(1) | 6668(8)   | 6706(1) | 36(1) |
| C(19A) | 7609(1) | 3793(10)  | 6016(1) | 64(1) |
| C(1B)  | 304(2)  | 1706(11)  | 5455(1) | 56(1) |
| C(2B)  | 726(2)  | 4508(9)   | 5855(1) | 48(1) |
| C(3B)  | 756(1)  | 2627(8)   | 6109(1) | 37(1) |
| C(4B)  | 988(1)  | 2213(8)   | 6562(1) | 34(1) |
| C(5B)  | 1345(1) | 3896(8)   | 6829(1) | 38(1) |
| C(6B)  | 1549(1) | 3563(8)   | 7260(1) | 39(1) |
| C(7B)  | 1418(1) | 1526(8)   | 7446(1) | 41(1) |
| C(8B)  | 1064(2) | -142(9)   | 7178(1) | 45(1) |
| C(9B)  | 854(1)  | 168(8)    | 6745(1) | 42(1) |
| C(10B) | 1656(2) | 1108(9)   | 7918(1) | 52(1) |
| C(11B) | 1736(2) | 3238(9)   | 8201(1) | 44(1) |
| C(12B) | 2224(2) | 4121(9)   | 8470(1) | 51(1) |

|        |         |          |          |       |
|--------|---------|----------|----------|-------|
| C(13B) | 1554(1) | 6404(8)  | 8557(1)  | 39(1) |
| C(14B) | 1250(2) | 8181(9)  | 8681(1)  | 47(1) |
| C(15B) | 675(2)  | 8198(10) | 8482(1)  | 52(1) |
| C(16B) | 407(2)  | 6536(11) | 8169(1)  | 52(1) |
| C(17B) | 710(1)  | 4777(10) | 8051(1)  | 47(1) |
| C(18B) | 1296(1) | 4715(8)  | 8245(1)  | 38(1) |
| C(19B) | 2551(2) | 7555(11) | 8995(1)  | 70(1) |
| C(1C)  | 6500(2) | 9962(10) | 6267(1)  | 47(1) |
| C(2C)  | 6092(2) | 7111(9)  | 5871(1)  | 47(1) |
| C(3C)  | 6049(1) | 8990(8)  | 5613(1)  | 36(1) |
| C(4C)  | 5812(1) | 9426(7)  | 5160(1)  | 33(1) |
| C(5C)  | 5448(1) | 7742(8)  | 4898(1)  | 35(1) |
| C(6C)  | 5224(1) | 8085(8)  | 4466(1)  | 38(1) |
| C(7C)  | 5356(1) | 10120(8) | 4280(1)  | 36(1) |
| C(8C)  | 5720(1) | 11779(8) | 4544(1)  | 41(1) |
| C(9C)  | 5943(1) | 11461(8) | 4975(1)  | 39(1) |
| C(10C) | 5108(2) | 10634(9) | 3809(1)  | 43(1) |
| C(11C) | 4990(1) | 8493(8)  | 3523(1)  | 37(1) |
| C(12C) | 4474(1) | 7654(9)  | 3265(1)  | 43(1) |
| C(13C) | 5097(1) | 5238(8)  | 3141(1)  | 34(1) |
| C(14C) | 5371(1) | 3514(9)  | 2994(1)  | 41(1) |
| C(15C) | 5952(1) | 3396(10) | 3165(1)  | 46(1) |
| C(16C) | 6259(2) | 5021(10) | 3477(1)  | 48(1) |
| C(17C) | 5992(1) | 6790(9)  | 3621(1)  | 41(1) |
| C(18C) | 5401(1) | 6940(8)  | 3449(1)  | 33(1) |
| C(19C) | 4080(1) | 4322(9)  | 2742(1)  | 50(1) |
| C(1D)  | 6277(2) | 6466(11) | 11129(1) | 52(1) |
| C(2D)  | 5895(2) | 9395(9)  | 10744(1) | 49(1) |
| C(3D)  | 5905(1) | 7610(8)  | 10478(1) | 36(1) |
| C(4D)  | 5722(1) | 7317(7)  | 10018(1) | 33(1) |
| C(5D)  | 5400(1) | 9084(8)  | 9754(1)  | 38(1) |
| C(6D)  | 5222(1) | 8833(8)  | 9320(1)  | 40(1) |
| C(7D)  | 5356(1) | 6816(8)  | 9134(1)  | 41(1) |
| C(8D)  | 5686(2) | 5085(8)  | 9401(1)  | 45(1) |
| C(9D)  | 5865(2) | 5301(8)  | 9836(1)  | 43(1) |
| C(10D) | 5127(2) | 6426(9)  | 8660(1)  | 51(1) |
| C(11D) | 5084(2) | 8604(9)  | 8387(1)  | 43(1) |
| C(12D) | 4607(2) | 9572(10) | 8122(1)  | 46(1) |

|        |         |           |          |       |
|--------|---------|-----------|----------|-------|
| C(13D) | 5301(1) | 11743(8)  | 8046(1)  | 36(1) |
| C(14D) | 5623(1) | 13469(9)  | 7934(1)  | 43(1) |
| C(15D) | 6199(2) | 13390(10) | 8139(1)  | 52(1) |
| C(16D) | 6444(2) | 11655(11) | 8442(1)  | 59(1) |
| C(17D) | 6123(2) | 9938(10)  | 8546(1)  | 49(1) |
| C(18D) | 5541(1) | 9982(8)   | 8349(1)  | 38(1) |
| C(19D) | 4314(1) | 13023(10) | 7613(1)  | 52(1) |
| C(1E)  | 7092(2) | 4966(10)  | 7193(1)  | 48(1) |
| C(2E)  | 7499(1) | 2147(9)   | 7589(1)  | 47(1) |
| C(3E)  | 7502(1) | 3930(8)   | 7850(1)  | 35(1) |
| C(4E)  | 7701(1) | 4285(8)   | 8305(1)  | 34(1) |
| C(5E)  | 8033(1) | 2539(8)   | 8573(1)  | 35(1) |
| C(6E)  | 8219(1) | 2806(8)   | 9007(1)  | 40(1) |
| C(7E)  | 8086(1) | 4841(8)   | 9192(1)  | 42(1) |
| C(8E)  | 7751(1) | 6561(9)   | 8925(1)  | 45(1) |
| C(9E)  | 7559(1) | 6299(9)   | 8490(1)  | 42(1) |
| C(10E) | 8310(2) | 5277(10)  | 9664(1)  | 60(1) |
| C(11E) | 8347(2) | 3102(9)   | 9933(1)  | 45(1) |
| C(12E) | 8826(2) | 2079(9)   | 10214(1) | 48(1) |
| C(13E) | 8125(1) | -99(8)    | 10274(1) | 39(1) |
| C(14E) | 7797(2) | -1762(9)  | 10379(1) | 51(1) |
| C(15E) | 7227(2) | -1682(10) | 10169(1) | 56(1) |
| C(16E) | 6979(2) | 47(11)    | 9859(1)  | 56(1) |
| C(17E) | 7303(1) | 1761(10)  | 9757(1)  | 47(1) |
| C(18E) | 7890(1) | 1720(8)   | 9967(1)  | 39(1) |
| C(19E) | 9102(2) | -1343(11) | 10726(1) | 65(1) |

---

-



**Table 3.** Bond lengths [ $\text{\AA}$ ] and angles [ $^\circ$ ] for mo\_d8v211027\_0m.

---

|              |          |
|--------------|----------|
| O(1)-C(1)    | 1.350(5) |
| O(1)-C(3)    | 1.375(5) |
| O(1A)-C(1A)  | 1.356(5) |
| O(1A)-C(3A)  | 1.388(5) |
| O(1B)-C(1B)  | 1.355(5) |
| O(1B)-C(3B)  | 1.378(5) |
| O(1C)-C(1C)  | 1.350(5) |
| O(1C)-C(3C)  | 1.386(5) |
| O(1D)-C(1D)  | 1.354(5) |
| O(1D)-C(3D)  | 1.376(5) |
| O(1E)-C(1E)  | 1.354(5) |
| O(1E)-C(3E)  | 1.387(5) |
| N(1)-C(1)    | 1.271(7) |
| N(1)-C(2)    | 1.385(5) |
| N(2)-C(13)   | 1.378(4) |
| N(2)-C(12)   | 1.395(6) |
| N(2)-C(19)   | 1.448(5) |
| N(1A)-C(1A)  | 1.266(7) |
| N(1A)-C(2A)  | 1.400(5) |
| N(2A)-C(12A) | 1.360(6) |
| N(2A)-C(13A) | 1.373(4) |
| N(2A)-C(19A) | 1.458(5) |
| N(1B)-C(1B)  | 1.273(7) |
| N(1B)-C(2B)  | 1.388(5) |
| N(2B)-C(13B) | 1.372(4) |
| N(2B)-C(12B) | 1.393(6) |
| N(2B)-C(19B) | 1.452(6) |
| N(1C)-C(1C)  | 1.287(7) |
| N(1C)-C(2C)  | 1.391(5) |
| N(2C)-C(12C) | 1.357(6) |
| N(2C)-C(13C) | 1.374(4) |
| N(2C)-C(19C) | 1.456(5) |
| N(1D)-C(1D)  | 1.286(7) |
| N(1D)-C(2D)  | 1.381(5) |
| N(2D)-C(13D) | 1.380(4) |
| N(2D)-C(12D) | 1.383(6) |

|              |          |
|--------------|----------|
| N(2D)-C(19D) | 1.434(5) |
| N(1E)-C(1E)  | 1.268(7) |
| N(1E)-C(2E)  | 1.393(5) |
| N(2E)-C(12E) | 1.352(6) |
| N(2E)-C(13E) | 1.368(4) |
| N(2E)-C(19E) | 1.462(6) |
| C(1)-H(1)    | 0.9400   |
| C(2)-C(3)    | 1.332(6) |
| C(2)-H(2)    | 0.9400   |
| C(3)-C(4)    | 1.447(5) |
| C(4)-C(5)    | 1.394(5) |
| C(4)-C(9)    | 1.396(6) |
| C(5)-C(6)    | 1.375(5) |
| C(5)-H(5)    | 0.9400   |
| C(6)-C(7)    | 1.388(6) |
| C(6)-H(6)    | 0.9400   |
| C(7)-C(8)    | 1.392(6) |
| C(7)-C(10)   | 1.509(5) |
| C(8)-C(9)    | 1.375(5) |
| C(8)-H(8)    | 0.9400   |
| C(9)-H(9)    | 0.9400   |
| C(10)-C(11)  | 1.499(6) |
| C(10)-H(10A) | 0.9800   |
| C(10)-H(10B) | 0.9800   |
| C(11)-C(12)  | 1.359(5) |
| C(11)-C(18)  | 1.434(5) |
| C(12)-H(12)  | 0.9400   |
| C(13)-C(18)  | 1.398(6) |
| C(13)-C(14)  | 1.410(6) |
| C(14)-C(15)  | 1.378(5) |
| C(14)-H(14)  | 0.9400   |
| C(15)-C(16)  | 1.394(6) |
| C(15)-H(15)  | 0.9400   |
| C(16)-C(17)  | 1.386(7) |
| C(16)-H(16)  | 0.9400   |
| C(17)-C(18)  | 1.397(4) |
| C(17)-H(17)  | 0.9400   |
| C(19)-H(19A) | 0.9700   |

|               |          |
|---------------|----------|
| C(19)-H(19B)  | 0.9700   |
| C(19)-H(19C)  | 0.9700   |
| C(1A)-H(1A)   | 0.9400   |
| C(2A)-C(3A)   | 1.343(6) |
| C(2A)-H(2A)   | 0.9400   |
| C(3A)-C(4A)   | 1.444(5) |
| C(4A)-C(9A)   | 1.383(6) |
| C(4A)-C(5A)   | 1.397(6) |
| C(5A)-C(6A)   | 1.383(5) |
| C(5A)-H(5A)   | 0.9400   |
| C(6A)-C(7A)   | 1.398(6) |
| C(6A)-H(6A)   | 0.9400   |
| C(7A)-C(8A)   | 1.377(6) |
| C(7A)-C(10A)  | 1.510(5) |
| C(8A)-C(9A)   | 1.374(5) |
| C(8A)-H(8A)   | 0.9400   |
| C(9A)-H(9A)   | 0.9400   |
| C(10A)-C(11A) | 1.493(7) |
| C(10A)-H(10C) | 0.9800   |
| C(10A)-H(10D) | 0.9800   |
| C(11A)-C(12A) | 1.365(6) |
| C(11A)-C(18A) | 1.441(5) |
| C(12A)-H(12A) | 0.9400   |
| C(13A)-C(14A) | 1.377(6) |
| C(13A)-C(18A) | 1.422(6) |
| C(14A)-C(15A) | 1.364(5) |
| C(14A)-H(14A) | 0.9400   |
| C(15A)-C(16A) | 1.397(6) |
| C(15A)-H(15A) | 0.9400   |
| C(16A)-C(17A) | 1.375(6) |
| C(16A)-H(16A) | 0.9400   |
| C(17A)-C(18A) | 1.405(4) |
| C(17A)-H(17A) | 0.9400   |
| C(19A)-H(19D) | 0.9700   |
| C(19A)-H(19E) | 0.9700   |
| C(19A)-H(19F) | 0.9700   |
| C(1B)-H(1B)   | 0.9400   |
| C(2B)-C(3B)   | 1.343(6) |

|               |          |
|---------------|----------|
| C(2B)-H(2B)   | 0.9400   |
| C(3B)-C(4B)   | 1.449(5) |
| C(4B)-C(9B)   | 1.395(6) |
| C(4B)-C(5B)   | 1.396(5) |
| C(5B)-C(6B)   | 1.372(5) |
| C(5B)-H(5B)   | 0.9400   |
| C(6B)-C(7B)   | 1.394(6) |
| C(6B)-H(6B)   | 0.9400   |
| C(7B)-C(8B)   | 1.388(6) |
| C(7B)-C(10B)  | 1.509(5) |
| C(8B)-C(9B)   | 1.375(5) |
| C(8B)-H(8B)   | 0.9400   |
| C(9B)-H(9B)   | 0.9400   |
| C(10B)-C(11B) | 1.496(6) |
| C(10B)-H(10E) | 0.9800   |
| C(10B)-H(10F) | 0.9800   |
| C(11B)-C(12B) | 1.344(5) |
| C(11B)-C(18B) | 1.433(5) |
| C(12B)-H(12B) | 0.9400   |
| C(13B)-C(18B) | 1.396(6) |
| C(13B)-C(14B) | 1.403(6) |
| C(14B)-C(15B) | 1.370(5) |
| C(14B)-H(14B) | 0.9400   |
| C(15B)-C(16B) | 1.392(7) |
| C(15B)-H(15B) | 0.9400   |
| C(16B)-C(17B) | 1.385(7) |
| C(16B)-H(16B) | 0.9400   |
| C(17B)-C(18B) | 1.394(5) |
| C(17B)-H(17B) | 0.9400   |
| C(19B)-H(19G) | 0.9700   |
| C(19B)-H(19H) | 0.9700   |
| C(19B)-H(19I) | 0.9700   |
| C(1C)-H(1C)   | 0.9400   |
| C(2C)-C(3C)   | 1.343(6) |
| C(2C)-H(2C)   | 0.9400   |
| C(3C)-C(4C)   | 1.452(5) |
| C(4C)-C(9C)   | 1.392(6) |
| C(4C)-C(5C)   | 1.397(5) |

|               |          |
|---------------|----------|
| C(5C)-C(6C)   | 1.380(5) |
| C(5C)-H(5C)   | 0.9400   |
| C(6C)-C(7C)   | 1.393(6) |
| C(6C)-H(6C)   | 0.9400   |
| C(7C)-C(8C)   | 1.389(6) |
| C(7C)-C(10C)  | 1.517(5) |
| C(8C)-C(9C)   | 1.373(5) |
| C(8C)-H(8C)   | 0.9400   |
| C(9C)-H(9C)   | 0.9400   |
| C(10C)-C(11C) | 1.501(6) |
| C(10C)-H(10G) | 0.9800   |
| C(10C)-H(10H) | 0.9800   |
| C(11C)-C(12C) | 1.374(5) |
| C(11C)-C(18C) | 1.437(5) |
| C(12C)-H(12C) | 0.9400   |
| C(13C)-C(14C) | 1.375(5) |
| C(13C)-C(18C) | 1.422(5) |
| C(14C)-C(15C) | 1.379(5) |
| C(14C)-H(14C) | 0.9400   |
| C(15C)-C(16C) | 1.402(6) |
| C(15C)-H(15C) | 0.9400   |
| C(16C)-C(17C) | 1.375(6) |
| C(16C)-H(16C) | 0.9400   |
| C(17C)-C(18C) | 1.404(4) |
| C(17C)-H(17C) | 0.9400   |
| C(19C)-H(19J) | 0.9700   |
| C(19C)-H(19K) | 0.9700   |
| C(19C)-H(19L) | 0.9700   |
| C(1D)-H(1D)   | 0.9400   |
| C(2D)-C(3D)   | 1.348(6) |
| C(2D)-H(2D)   | 0.9400   |
| C(3D)-C(4D)   | 1.462(5) |
| C(4D)-C(9D)   | 1.389(6) |
| C(4D)-C(5D)   | 1.389(5) |
| C(5D)-C(6D)   | 1.377(5) |
| C(5D)-H(5D)   | 0.9400   |
| C(6D)-C(7D)   | 1.389(6) |
| C(6D)-H(6D)   | 0.9400   |

|               |          |
|---------------|----------|
| C(7D)-C(8D)   | 1.387(6) |
| C(7D)-C(10D)  | 1.511(5) |
| C(8D)-C(9D)   | 1.379(5) |
| C(8D)-H(8D)   | 0.9400   |
| C(9D)-H(9D)   | 0.9400   |
| C(10D)-C(11D) | 1.508(6) |
| C(10D)-H(10I) | 0.9800   |
| C(10D)-H(10J) | 0.9800   |
| C(11D)-C(12D) | 1.341(6) |
| C(11D)-C(18D) | 1.426(5) |
| C(12D)-H(12D) | 0.9400   |
| C(13D)-C(14D) | 1.396(6) |
| C(13D)-C(18D) | 1.397(6) |
| C(14D)-C(15D) | 1.376(5) |
| C(14D)-H(14D) | 0.9400   |
| C(15D)-C(16D) | 1.389(7) |
| C(15D)-H(15D) | 0.9400   |
| C(16D)-C(17D) | 1.377(7) |
| C(16D)-H(16D) | 0.9400   |
| C(17D)-C(18D) | 1.386(5) |
| C(17D)-H(17D) | 0.9400   |
| C(19D)-H(19M) | 0.9700   |
| C(19D)-H(19N) | 0.9700   |
| C(19D)-H(19O) | 0.9700   |
| C(1E)-H(1E)   | 0.9400   |
| C(2E)-C(3E)   | 1.329(6) |
| C(2E)-H(2E)   | 0.9400   |
| C(3E)-C(4E)   | 1.448(5) |
| C(4E)-C(9E)   | 1.393(6) |
| C(4E)-C(5E)   | 1.397(5) |
| C(5E)-C(6E)   | 1.380(5) |
| C(5E)-H(5E)   | 0.9400   |
| C(6E)-C(7E)   | 1.392(6) |
| C(6E)-H(6E)   | 0.9400   |
| C(7E)-C(8E)   | 1.387(6) |
| C(7E)-C(10E)  | 1.511(5) |
| C(8E)-C(9E)   | 1.380(5) |
| C(8E)-H(8E)   | 0.9400   |

|                     |          |
|---------------------|----------|
| C(9E)-H(9E)         | 0.9400   |
| C(10E)-C(11E)       | 1.500(7) |
| C(10E)-H(10K)       | 0.9800   |
| C(10E)-H(10L)       | 0.9800   |
| C(11E)-C(12E)       | 1.377(6) |
| C(11E)-C(18E)       | 1.425(5) |
| C(12E)-H(12E)       | 0.9400   |
| C(13E)-C(14E)       | 1.370(6) |
| C(13E)-C(18E)       | 1.427(6) |
| C(14E)-C(15E)       | 1.365(5) |
| C(14E)-H(14E)       | 0.9400   |
| C(15E)-C(16E)       | 1.402(7) |
| C(15E)-H(15E)       | 0.9400   |
| C(16E)-C(17E)       | 1.377(7) |
| C(16E)-H(16E)       | 0.9400   |
| C(17E)-C(18E)       | 1.402(4) |
| C(17E)-H(17E)       | 0.9400   |
| C(19E)-H(19P)       | 0.9700   |
| C(19E)-H(19Q)       | 0.9700   |
| C(19E)-H(19R)       | 0.9700   |
|                     |          |
| C(1)-O(1)-C(3)      | 104.3(4) |
| C(1A)-O(1A)-C(3A)   | 105.0(4) |
| C(1B)-O(1B)-C(3B)   | 104.4(4) |
| C(1C)-O(1C)-C(3C)   | 104.7(4) |
| C(1D)-O(1D)-C(3D)   | 104.5(4) |
| C(1E)-O(1E)-C(3E)   | 104.6(4) |
| C(1)-N(1)-C(2)      | 103.6(4) |
| C(13)-N(2)-C(12)    | 106.9(3) |
| C(13)-N(2)-C(19)    | 126.3(4) |
| C(12)-N(2)-C(19)    | 126.7(3) |
| C(1A)-N(1A)-C(2A)   | 103.8(4) |
| C(12A)-N(2A)-C(13A) | 109.3(4) |
| C(12A)-N(2A)-C(19A) | 126.2(3) |
| C(13A)-N(2A)-C(19A) | 124.4(4) |
| C(1B)-N(1B)-C(2B)   | 104.3(4) |
| C(13B)-N(2B)-C(12B) | 106.5(3) |
| C(13B)-N(2B)-C(19B) | 126.3(4) |

|                     |          |
|---------------------|----------|
| C(12B)-N(2B)-C(19B) | 127.2(3) |
| C(1C)-N(1C)-C(2C)   | 103.7(4) |
| C(12C)-N(2C)-C(13C) | 108.5(3) |
| C(12C)-N(2C)-C(19C) | 127.2(3) |
| C(13C)-N(2C)-C(19C) | 124.1(4) |
| C(1D)-N(1D)-C(2D)   | 104.2(4) |
| C(13D)-N(2D)-C(12D) | 106.6(3) |
| C(13D)-N(2D)-C(19D) | 126.7(4) |
| C(12D)-N(2D)-C(19D) | 126.7(3) |
| C(1E)-N(1E)-C(2E)   | 103.5(4) |
| C(12E)-N(2E)-C(13E) | 108.9(4) |
| C(12E)-N(2E)-C(19E) | 126.3(3) |
| C(13E)-N(2E)-C(19E) | 124.7(4) |
| N(1)-C(1)-O(1)      | 115.0(4) |
| N(1)-C(1)-H(1)      | 122.5    |
| O(1)-C(1)-H(1)      | 122.5    |
| C(3)-C(2)-N(1)      | 110.6(4) |
| C(3)-C(2)-H(2)      | 124.7    |
| N(1)-C(2)-H(2)      | 124.7    |
| C(2)-C(3)-O(1)      | 106.6(3) |
| C(2)-C(3)-C(4)      | 135.3(4) |
| O(1)-C(3)-C(4)      | 118.2(4) |
| C(5)-C(4)-C(9)      | 117.8(3) |
| C(5)-C(4)-C(3)      | 120.4(4) |
| C(9)-C(4)-C(3)      | 121.7(4) |
| C(6)-C(5)-C(4)      | 121.2(4) |
| C(6)-C(5)-H(5)      | 119.4    |
| C(4)-C(5)-H(5)      | 119.4    |
| C(5)-C(6)-C(7)      | 121.0(4) |
| C(5)-C(6)-H(6)      | 119.5    |
| C(7)-C(6)-H(6)      | 119.5    |
| C(6)-C(7)-C(8)      | 117.9(3) |
| C(6)-C(7)-C(10)     | 122.2(4) |
| C(8)-C(7)-C(10)     | 119.9(4) |
| C(9)-C(8)-C(7)      | 121.5(4) |
| C(9)-C(8)-H(8)      | 119.2    |
| C(7)-C(8)-H(8)      | 119.2    |
| C(8)-C(9)-C(4)      | 120.6(4) |



|                     |          |
|---------------------|----------|
| C(8)-C(9)-H(9)      | 119.7    |
| C(4)-C(9)-H(9)      | 119.7    |
| C(11)-C(10)-C(7)    | 117.0(4) |
| C(11)-C(10)-H(10A)  | 108.0    |
| C(7)-C(10)-H(10A)   | 108.0    |
| C(11)-C(10)-H(10B)  | 108.0    |
| C(7)-C(10)-H(10B)   | 108.0    |
| H(10A)-C(10)-H(10B) | 107.3    |
| C(12)-C(11)-C(18)   | 106.2(4) |
| C(12)-C(11)-C(10)   | 127.0(4) |
| C(18)-C(11)-C(10)   | 126.6(3) |
| C(11)-C(12)-N(2)    | 110.8(3) |
| C(11)-C(12)-H(12)   | 124.6    |
| N(2)-C(12)-H(12)    | 124.6    |
| N(2)-C(13)-C(18)    | 108.8(4) |
| N(2)-C(13)-C(14)    | 128.5(4) |
| C(18)-C(13)-C(14)   | 122.6(3) |
| C(15)-C(14)-C(13)   | 117.1(4) |
| C(15)-C(14)-H(14)   | 121.4    |
| C(13)-C(14)-H(14)   | 121.4    |
| C(14)-C(15)-C(16)   | 121.2(4) |
| C(14)-C(15)-H(15)   | 119.4    |
| C(16)-C(15)-H(15)   | 119.4    |
| C(17)-C(16)-C(15)   | 121.1(3) |
| C(17)-C(16)-H(16)   | 119.4    |
| C(15)-C(16)-H(16)   | 119.4    |
| C(16)-C(17)-C(18)   | 119.4(4) |
| C(16)-C(17)-H(17)   | 120.3    |
| C(18)-C(17)-H(17)   | 120.3    |
| C(17)-C(18)-C(13)   | 118.5(4) |
| C(17)-C(18)-C(11)   | 134.3(4) |
| C(13)-C(18)-C(11)   | 107.2(3) |
| N(2)-C(19)-H(19A)   | 109.5    |
| N(2)-C(19)-H(19B)   | 109.5    |
| H(19A)-C(19)-H(19B) | 109.5    |
| N(2)-C(19)-H(19C)   | 109.5    |
| H(19A)-C(19)-H(19C) | 109.5    |
| H(19B)-C(19)-H(19C) | 109.5    |

|                      |          |
|----------------------|----------|
| N(1A)-C(1A)-O(1A)    | 115.0(5) |
| N(1A)-C(1A)-H(1A)    | 122.5    |
| O(1A)-C(1A)-H(1A)    | 122.5    |
| C(3A)-C(2A)-N(1A)    | 110.7(5) |
| C(3A)-C(2A)-H(2A)    | 124.6    |
| N(1A)-C(2A)-H(2A)    | 124.6    |
| C(2A)-C(3A)-O(1A)    | 105.6(3) |
| C(2A)-C(3A)-C(4A)    | 136.7(4) |
| O(1A)-C(3A)-C(4A)    | 117.7(4) |
| C(9A)-C(4A)-C(5A)    | 118.5(3) |
| C(9A)-C(4A)-C(3A)    | 122.5(4) |
| C(5A)-C(4A)-C(3A)    | 119.0(4) |
| C(6A)-C(5A)-C(4A)    | 120.2(4) |
| C(6A)-C(5A)-H(5A)    | 119.9    |
| C(4A)-C(5A)-H(5A)    | 119.9    |
| C(5A)-C(6A)-C(7A)    | 120.8(4) |
| C(5A)-C(6A)-H(6A)    | 119.6    |
| C(7A)-C(6A)-H(6A)    | 119.6    |
| C(8A)-C(7A)-C(6A)    | 118.0(4) |
| C(8A)-C(7A)-C(10A)   | 119.3(4) |
| C(6A)-C(7A)-C(10A)   | 122.6(4) |
| C(9A)-C(8A)-C(7A)    | 121.6(4) |
| C(9A)-C(8A)-H(8A)    | 119.2    |
| C(7A)-C(8A)-H(8A)    | 119.2    |
| C(8A)-C(9A)-C(4A)    | 120.8(4) |
| C(8A)-C(9A)-H(9A)    | 119.6    |
| C(4A)-C(9A)-H(9A)    | 119.6    |
| C(11A)-C(10A)-C(7A)  | 116.5(4) |
| C(11A)-C(10A)-H(10C) | 108.2    |
| C(7A)-C(10A)-H(10C)  | 108.2    |
| C(11A)-C(10A)-H(10D) | 108.2    |
| C(7A)-C(10A)-H(10D)  | 108.2    |
| H(10C)-C(10A)-H(10D) | 107.3    |
| C(12A)-C(11A)-C(18A) | 104.9(4) |
| C(12A)-C(11A)-C(10A) | 128.3(4) |
| C(18A)-C(11A)-C(10A) | 126.8(3) |
| N(2A)-C(12A)-C(11A)  | 111.5(3) |
| N(2A)-C(12A)-H(12A)  | 124.2    |

|                      |          |
|----------------------|----------|
| C(11A)-C(12A)-H(12A) | 124.2    |
| N(2A)-C(13A)-C(14A)  | 131.6(4) |
| N(2A)-C(13A)-C(18A)  | 106.5(4) |
| C(14A)-C(13A)-C(18A) | 121.9(3) |
| C(15A)-C(14A)-C(13A) | 117.9(4) |
| C(15A)-C(14A)-H(14A) | 121.0    |
| C(13A)-C(14A)-H(14A) | 121.0    |
| C(14A)-C(15A)-C(16A) | 122.0(4) |
| C(14A)-C(15A)-H(15A) | 119.0    |
| C(16A)-C(15A)-H(15A) | 119.0    |
| C(17A)-C(16A)-C(15A) | 120.7(3) |
| C(17A)-C(16A)-H(16A) | 119.6    |
| C(15A)-C(16A)-H(16A) | 119.6    |
| C(16A)-C(17A)-C(18A) | 118.9(4) |
| C(16A)-C(17A)-H(17A) | 120.6    |
| C(18A)-C(17A)-H(17A) | 120.6    |
| C(17A)-C(18A)-C(13A) | 118.6(4) |
| C(17A)-C(18A)-C(11A) | 133.6(4) |
| C(13A)-C(18A)-C(11A) | 107.8(3) |
| N(2A)-C(19A)-H(19D)  | 109.5    |
| N(2A)-C(19A)-H(19E)  | 109.5    |
| H(19D)-C(19A)-H(19E) | 109.5    |
| N(2A)-C(19A)-H(19F)  | 109.5    |
| H(19D)-C(19A)-H(19F) | 109.5    |
| H(19E)-C(19A)-H(19F) | 109.5    |
| N(1B)-C(1B)-O(1B)    | 114.6(4) |
| N(1B)-C(1B)-H(1B)    | 122.7    |
| O(1B)-C(1B)-H(1B)    | 122.7    |
| C(3B)-C(2B)-N(1B)    | 110.0(4) |
| C(3B)-C(2B)-H(2B)    | 125.0    |
| N(1B)-C(2B)-H(2B)    | 125.0    |
| C(2B)-C(3B)-O(1B)    | 106.7(3) |
| C(2B)-C(3B)-C(4B)    | 135.1(4) |
| O(1B)-C(3B)-C(4B)    | 118.2(4) |
| C(9B)-C(4B)-C(5B)    | 118.2(3) |
| C(9B)-C(4B)-C(3B)    | 121.5(4) |
| C(5B)-C(4B)-C(3B)    | 120.3(4) |
| C(6B)-C(5B)-C(4B)    | 120.7(4) |

|                      |          |
|----------------------|----------|
| C(6B)-C(5B)-H(5B)    | 119.6    |
| C(4B)-C(5B)-H(5B)    | 119.6    |
| C(5B)-C(6B)-C(7B)    | 121.4(4) |
| C(5B)-C(6B)-H(6B)    | 119.3    |
| C(7B)-C(6B)-H(6B)    | 119.3    |
| C(8B)-C(7B)-C(6B)    | 117.4(4) |
| C(8B)-C(7B)-C(10B)   | 120.8(4) |
| C(6B)-C(7B)-C(10B)   | 121.7(4) |
| C(9B)-C(8B)-C(7B)    | 121.9(4) |
| C(9B)-C(8B)-H(8B)    | 119.1    |
| C(7B)-C(8B)-H(8B)    | 119.1    |
| C(8B)-C(9B)-C(4B)    | 120.3(4) |
| C(8B)-C(9B)-H(9B)    | 119.8    |
| C(4B)-C(9B)-H(9B)    | 119.8    |
| C(11B)-C(10B)-C(7B)  | 117.5(4) |
| C(11B)-C(10B)-H(10E) | 107.9    |
| C(7B)-C(10B)-H(10E)  | 107.9    |
| C(11B)-C(10B)-H(10F) | 107.9    |
| C(7B)-C(10B)-H(10F)  | 107.9    |
| H(10E)-C(10B)-H(10F) | 107.2    |
| C(12B)-C(11B)-C(18B) | 106.1(4) |
| C(12B)-C(11B)-C(10B) | 127.9(4) |
| C(18B)-C(11B)-C(10B) | 125.9(4) |
| C(11B)-C(12B)-N(2B)  | 111.4(3) |
| C(11B)-C(12B)-H(12B) | 124.3    |
| N(2B)-C(12B)-H(12B)  | 124.3    |
| N(2B)-C(13B)-C(18B)  | 108.9(4) |
| N(2B)-C(13B)-C(14B)  | 128.2(4) |
| C(18B)-C(13B)-C(14B) | 122.8(3) |
| C(15B)-C(14B)-C(13B) | 117.0(4) |
| C(15B)-C(14B)-H(14B) | 121.5    |
| C(13B)-C(14B)-H(14B) | 121.5    |
| C(14B)-C(15B)-C(16B) | 121.3(4) |
| C(14B)-C(15B)-H(15B) | 119.4    |
| C(16B)-C(15B)-H(15B) | 119.4    |
| C(17B)-C(16B)-C(15B) | 121.4(3) |
| C(17B)-C(16B)-H(16B) | 119.3    |
| C(15B)-C(16B)-H(16B) | 119.3    |

|                      |          |
|----------------------|----------|
| C(16B)-C(17B)-C(18B) | 118.8(4) |
| C(16B)-C(17B)-H(17B) | 120.6    |
| C(18B)-C(17B)-H(17B) | 120.6    |
| C(17B)-C(18B)-C(13B) | 118.6(4) |
| C(17B)-C(18B)-C(11B) | 134.4(4) |
| C(13B)-C(18B)-C(11B) | 107.0(3) |
| N(2B)-C(19B)-H(19G)  | 109.5    |
| N(2B)-C(19B)-H(19H)  | 109.5    |
| H(19G)-C(19B)-H(19H) | 109.5    |
| N(2B)-C(19B)-H(19I)  | 109.5    |
| H(19G)-C(19B)-H(19I) | 109.5    |
| H(19H)-C(19B)-H(19I) | 109.5    |
| N(1C)-C(1C)-O(1C)    | 114.8(4) |
| N(1C)-C(1C)-H(1C)    | 122.6    |
| O(1C)-C(1C)-H(1C)    | 122.6    |
| C(3C)-C(2C)-N(1C)    | 110.5(4) |
| C(3C)-C(2C)-H(2C)    | 124.7    |
| N(1C)-C(2C)-H(2C)    | 124.7    |
| C(2C)-C(3C)-O(1C)    | 106.3(3) |
| C(2C)-C(3C)-C(4C)    | 136.1(4) |
| O(1C)-C(3C)-C(4C)    | 117.6(4) |
| C(9C)-C(4C)-C(5C)    | 118.6(3) |
| C(9C)-C(4C)-C(3C)    | 122.1(4) |
| C(5C)-C(4C)-C(3C)    | 119.3(4) |
| C(6C)-C(5C)-C(4C)    | 120.7(4) |
| C(6C)-C(5C)-H(5C)    | 119.7    |
| C(4C)-C(5C)-H(5C)    | 119.7    |
| C(5C)-C(6C)-C(7C)    | 120.7(4) |
| C(5C)-C(6C)-H(6C)    | 119.6    |
| C(7C)-C(6C)-H(6C)    | 119.6    |
| C(8C)-C(7C)-C(6C)    | 118.1(3) |
| C(8C)-C(7C)-C(10C)   | 118.8(4) |
| C(6C)-C(7C)-C(10C)   | 123.1(4) |
| C(9C)-C(8C)-C(7C)    | 121.7(4) |
| C(9C)-C(8C)-H(8C)    | 119.1    |
| C(7C)-C(8C)-H(8C)    | 119.1    |
| C(8C)-C(9C)-C(4C)    | 120.2(4) |
| C(8C)-C(9C)-H(9C)    | 119.9    |

|                      |          |
|----------------------|----------|
| C(4C)-C(9C)-H(9C)    | 119.9    |
| C(11C)-C(10C)-C(7C)  | 115.8(4) |
| C(11C)-C(10C)-H(10G) | 108.3    |
| C(7C)-C(10C)-H(10G)  | 108.3    |
| C(11C)-C(10C)-H(10H) | 108.3    |
| C(7C)-C(10C)-H(10H)  | 108.3    |
| H(10G)-C(10C)-H(10H) | 107.4    |
| C(12C)-C(11C)-C(18C) | 105.4(4) |
| C(12C)-C(11C)-C(10C) | 127.8(3) |
| C(18C)-C(11C)-C(10C) | 126.7(3) |
| N(2C)-C(12C)-C(11C)  | 111.5(3) |
| N(2C)-C(12C)-H(12C)  | 124.3    |
| C(11C)-C(12C)-H(12C) | 124.3    |
| N(2C)-C(13C)-C(14C)  | 130.9(4) |
| N(2C)-C(13C)-C(18C)  | 107.6(3) |
| C(14C)-C(13C)-C(18C) | 121.5(3) |
| C(13C)-C(14C)-C(15C) | 118.4(4) |
| C(13C)-C(14C)-H(14C) | 120.8    |
| C(15C)-C(14C)-H(14C) | 120.8    |
| C(14C)-C(15C)-C(16C) | 120.9(4) |
| C(14C)-C(15C)-H(15C) | 119.6    |
| C(16C)-C(15C)-H(15C) | 119.5    |
| C(17C)-C(16C)-C(15C) | 121.4(3) |
| C(17C)-C(16C)-H(16C) | 119.3    |
| C(15C)-C(16C)-H(16C) | 119.3    |
| C(16C)-C(17C)-C(18C) | 118.4(4) |
| C(16C)-C(17C)-H(17C) | 120.8    |
| C(18C)-C(17C)-H(17C) | 120.8    |
| C(17C)-C(18C)-C(13C) | 119.2(4) |
| C(17C)-C(18C)-C(11C) | 133.7(4) |
| C(13C)-C(18C)-C(11C) | 107.0(3) |
| N(2C)-C(19C)-H(19J)  | 109.5    |
| N(2C)-C(19C)-H(19K)  | 109.5    |
| H(19J)-C(19C)-H(19K) | 109.5    |
| N(2C)-C(19C)-H(19L)  | 109.5    |
| H(19J)-C(19C)-H(19L) | 109.5    |
| H(19K)-C(19C)-H(19L) | 109.5    |
| N(1D)-C(1D)-O(1D)    | 114.4(5) |

|                      |          |
|----------------------|----------|
| N(1D)-C(1D)-H(1D)    | 122.8    |
| O(1D)-C(1D)-H(1D)    | 122.8    |
| C(3D)-C(2D)-N(1D)    | 110.0(4) |
| C(3D)-C(2D)-H(2D)    | 125.0    |
| N(1D)-C(2D)-H(2D)    | 125.0    |
| C(2D)-C(3D)-O(1D)    | 106.8(3) |
| C(2D)-C(3D)-C(4D)    | 135.5(4) |
| O(1D)-C(3D)-C(4D)    | 117.6(3) |
| C(9D)-C(4D)-C(5D)    | 118.8(3) |
| C(9D)-C(4D)-C(3D)    | 121.4(4) |
| C(5D)-C(4D)-C(3D)    | 119.8(3) |
| C(6D)-C(5D)-C(4D)    | 120.6(4) |
| C(6D)-C(5D)-H(5D)    | 119.7    |
| C(4D)-C(5D)-H(5D)    | 119.7    |
| C(5D)-C(6D)-C(7D)    | 121.2(4) |
| C(5D)-C(6D)-H(6D)    | 119.4    |
| C(7D)-C(6D)-H(6D)    | 119.4    |
| C(8D)-C(7D)-C(6D)    | 117.6(4) |
| C(8D)-C(7D)-C(10D)   | 120.4(4) |
| C(6D)-C(7D)-C(10D)   | 121.9(4) |
| C(9D)-C(8D)-C(7D)    | 121.9(4) |
| C(9D)-C(8D)-H(8D)    | 119.1    |
| C(7D)-C(8D)-H(8D)    | 119.1    |
| C(8D)-C(9D)-C(4D)    | 119.9(4) |
| C(8D)-C(9D)-H(9D)    | 120.1    |
| C(4D)-C(9D)-H(9D)    | 120.1    |
| C(11D)-C(10D)-C(7D)  | 116.4(4) |
| C(11D)-C(10D)-H(10I) | 108.2    |
| C(7D)-C(10D)-H(10I)  | 108.2    |
| C(11D)-C(10D)-H(10J) | 108.2    |
| C(7D)-C(10D)-H(10J)  | 108.2    |
| H(10I)-C(10D)-H(10J) | 107.3    |
| C(12D)-C(11D)-C(18D) | 106.8(4) |
| C(12D)-C(11D)-C(10D) | 126.2(4) |
| C(18D)-C(11D)-C(10D) | 126.9(4) |
| C(11D)-C(12D)-N(2D)  | 111.2(3) |
| C(11D)-C(12D)-H(12D) | 124.4    |
| N(2D)-C(12D)-H(12D)  | 124.4    |

|                      |          |
|----------------------|----------|
| N(2D)-C(13D)-C(14D)  | 128.5(4) |
| N(2D)-C(13D)-C(18D)  | 108.7(4) |
| C(14D)-C(13D)-C(18D) | 122.7(3) |
| C(15D)-C(14D)-C(13D) | 116.9(4) |
| C(15D)-C(14D)-H(14D) | 121.5    |
| C(13D)-C(14D)-H(14D) | 121.5    |
| C(14D)-C(15D)-C(16D) | 121.1(4) |
| C(14D)-C(15D)-H(15D) | 119.5    |
| C(16D)-C(15D)-H(15D) | 119.5    |
| C(17D)-C(16D)-C(15D) | 121.5(4) |
| C(17D)-C(16D)-H(16D) | 119.2    |
| C(15D)-C(16D)-H(16D) | 119.2    |
| C(16D)-C(17D)-C(18D) | 119.0(4) |
| C(16D)-C(17D)-H(17D) | 120.5    |
| C(18D)-C(17D)-H(17D) | 120.5    |
| C(17D)-C(18D)-C(13D) | 118.8(4) |
| C(17D)-C(18D)-C(11D) | 134.5(4) |
| C(13D)-C(18D)-C(11D) | 106.7(3) |
| N(2D)-C(19D)-H(19M)  | 109.5    |
| N(2D)-C(19D)-H(19N)  | 109.5    |
| H(19M)-C(19D)-H(19N) | 109.5    |
| N(2D)-C(19D)-H(19O)  | 109.5    |
| H(19M)-C(19D)-H(19O) | 109.5    |
| H(19N)-C(19D)-H(19O) | 109.5    |
| N(1E)-C(1E)-O(1E)    | 114.9(4) |
| N(1E)-C(1E)-H(1E)    | 122.5    |
| O(1E)-C(1E)-H(1E)    | 122.5    |
| C(3E)-C(2E)-N(1E)    | 111.1(4) |
| C(3E)-C(2E)-H(2E)    | 124.4    |
| N(1E)-C(2E)-H(2E)    | 124.4    |
| C(2E)-C(3E)-O(1E)    | 105.9(3) |
| C(2E)-C(3E)-C(4E)    | 136.2(4) |
| O(1E)-C(3E)-C(4E)    | 117.9(4) |
| C(9E)-C(4E)-C(5E)    | 118.0(3) |
| C(9E)-C(4E)-C(3E)    | 122.2(4) |
| C(5E)-C(4E)-C(3E)    | 119.7(4) |
| C(6E)-C(5E)-C(4E)    | 121.0(4) |
| C(6E)-C(5E)-H(5E)    | 119.5    |



|                      |          |
|----------------------|----------|
| C(4E)-C(5E)-H(5E)    | 119.5    |
| C(5E)-C(6E)-C(7E)    | 120.9(4) |
| C(5E)-C(6E)-H(6E)    | 119.5    |
| C(7E)-C(6E)-H(6E)    | 119.6    |
| C(8E)-C(7E)-C(6E)    | 118.0(4) |
| C(8E)-C(7E)-C(10E)   | 119.4(4) |
| C(6E)-C(7E)-C(10E)   | 122.6(4) |
| C(9E)-C(8E)-C(7E)    | 121.6(4) |
| C(9E)-C(8E)-H(8E)    | 119.2    |
| C(7E)-C(8E)-H(8E)    | 119.2    |
| C(8E)-C(9E)-C(4E)    | 120.5(4) |
| C(8E)-C(9E)-H(9E)    | 119.7    |
| C(4E)-C(9E)-H(9E)    | 119.7    |
| C(11E)-C(10E)-C(7E)  | 115.1(4) |
| C(11E)-C(10E)-H(10K) | 108.5    |
| C(7E)-C(10E)-H(10K)  | 108.5    |
| C(11E)-C(10E)-H(10L) | 108.5    |
| C(7E)-C(10E)-H(10L)  | 108.5    |
| H(10K)-C(10E)-H(10L) | 107.5    |
| C(12E)-C(11E)-C(18E) | 105.2(4) |
| C(12E)-C(11E)-C(10E) | 127.4(4) |
| C(18E)-C(11E)-C(10E) | 127.3(4) |
| N(2E)-C(12E)-C(11E)  | 111.4(3) |
| N(2E)-C(12E)-H(12E)  | 124.3    |
| C(11E)-C(12E)-H(12E) | 124.3    |
| N(2E)-C(13E)-C(14E)  | 130.7(4) |
| N(2E)-C(13E)-C(18E)  | 107.0(4) |
| C(14E)-C(13E)-C(18E) | 122.2(3) |
| C(15E)-C(14E)-C(13E) | 117.8(4) |
| C(15E)-C(14E)-H(14E) | 121.1    |
| C(13E)-C(14E)-H(14E) | 121.1    |
| C(14E)-C(15E)-C(16E) | 121.8(4) |
| C(14E)-C(15E)-H(15E) | 119.1    |
| C(16E)-C(15E)-H(15E) | 119.1    |
| C(17E)-C(16E)-C(15E) | 121.0(4) |
| C(17E)-C(16E)-H(16E) | 119.5    |
| C(15E)-C(16E)-H(16E) | 119.5    |
| C(16E)-C(17E)-C(18E) | 118.5(4) |

|                      |          |
|----------------------|----------|
| C(16E)-C(17E)-H(17E) | 120.8    |
| C(18E)-C(17E)-H(17E) | 120.8    |
| C(17E)-C(18E)-C(11E) | 133.8(4) |
| C(17E)-C(18E)-C(13E) | 118.7(4) |
| C(11E)-C(18E)-C(13E) | 107.4(3) |
| N(2E)-C(19E)-H(19P)  | 109.5    |
| N(2E)-C(19E)-H(19Q)  | 109.5    |
| H(19P)-C(19E)-H(19Q) | 109.5    |
| N(2E)-C(19E)-H(19R)  | 109.5    |
| H(19P)-C(19E)-H(19R) | 109.5    |
| H(19Q)-C(19E)-H(19R) | 109.5    |

---

Symmetry transformations used to generate equivalent atoms:

**Table 4.** Anisotropic displacement parameters ( $\text{\AA}^2 \times 10^3$ ) for mo\_d8v211027\_0m. The anisotropic

displacement factor exponent takes the form:  $-2 \left[ h^2 a^{*2} U^{11} + \dots + 2 h k a^* b^* U^{12} \right]$

|       | U <sup>11</sup> | U <sup>22</sup> | U <sup>33</sup> | U <sup>23</sup> | U <sup>13</sup> | U <sup>12</sup> |
|-------|-----------------|-----------------|-----------------|-----------------|-----------------|-----------------|
| O(1)  | 50(1)           | 40(2)           | 43(2)           | -9(1)           | 8(1)            | -6(1)           |
| O(1A) | 56(1)           | 48(2)           | 43(2)           | -5(1)           | 17(1)           | -4(1)           |
| O(1B) | 60(2)           | 40(2)           | 50(2)           | -9(2)           | 18(1)           | -4(1)           |
| O(1C) | 50(1)           | 44(2)           | 36(2)           | -3(1)           | 11(1)           | -2(1)           |
| O(1D) | 59(2)           | 39(2)           | 40(2)           | 4(1)            | 12(1)           | 2(1)            |
| O(1E) | 54(1)           | 43(2)           | 44(2)           | 8(2)            | 13(1)           | 8(1)            |
| N(1)  | 50(2)           | 60(3)           | 42(2)           | 6(2)            | 10(1)           | 0(2)            |
| N(2)  | 35(1)           | 47(2)           | 44(2)           | 5(2)            | 8(1)            | -3(1)           |
| N(1A) | 66(2)           | 67(3)           | 45(2)           | 4(2)            | 19(2)           | 1(2)            |
| N(2A) | 35(2)           | 59(2)           | 46(2)           | 8(2)            | 9(1)            | -5(2)           |
| N(1B) | 63(2)           | 57(3)           | 43(2)           | 2(2)            | 16(2)           | 2(2)            |
| N(2B) | 36(2)           | 53(2)           | 47(2)           | 11(2)           | 7(1)            | -2(2)           |
| N(1C) | 57(2)           | 62(3)           | 36(2)           | 3(2)            | 10(1)           | 5(2)            |
| N(2C) | 35(1)           | 51(2)           | 35(2)           | -1(2)           | 12(1)           | -4(1)           |
| N(1D) | 62(2)           | 60(3)           | 36(2)           | -6(2)           | 10(2)           | 1(2)            |
| N(2D) | 40(2)           | 42(2)           | 35(2)           | -2(2)           | 13(1)           | -1(1)           |
| N(1E) | 52(2)           | 69(3)           | 40(2)           | -1(2)           | 10(2)           | 2(2)            |
| N(2E) | 41(2)           | 57(2)           | 46(2)           | -5(2)           | 9(1)            | 6(2)            |
| C(1)  | 42(2)           | 73(4)           | 35(2)           | -9(2)           | 8(2)            | -4(2)           |
| C(2)  | 47(2)           | 40(3)           | 42(2)           | 2(2)            | 9(2)            | -2(2)           |
| C(3)  | 28(1)           | 30(2)           | 37(2)           | -6(2)           | 9(1)            | -3(1)           |
| C(4)  | 29(1)           | 29(2)           | 39(2)           | 0(2)            | 13(1)           | 3(1)            |
| C(5)  | 35(2)           | 32(2)           | 39(2)           | 4(2)            | 12(1)           | -2(2)           |
| C(6)  | 36(2)           | 34(2)           | 39(2)           | -1(2)           | 9(1)            | -2(2)           |
| C(7)  | 38(2)           | 35(2)           | 39(2)           | 2(2)            | 16(1)           | 6(2)            |
| C(8)  | 48(2)           | 29(2)           | 47(2)           | 7(2)            | 19(2)           | 0(2)            |
| C(9)  | 38(2)           | 32(2)           | 43(2)           | -4(2)           | 11(1)           | -6(2)           |
| C(10) | 66(2)           | 40(3)           | 41(2)           | 10(2)           | 23(2)           | 13(2)           |
| C(11) | 47(2)           | 45(3)           | 35(2)           | 10(2)           | 14(2)           | 2(2)            |
| C(12) | 40(2)           | 53(3)           | 44(2)           | 14(2)           | 13(2)           | 6(2)            |
| C(13) | 36(2)           | 41(2)           | 34(2)           | 5(2)            | 11(1)           | -4(2)           |
| C(14) | 50(2)           | 46(3)           | 40(2)           | -3(2)           | 14(2)           | -4(2)           |

|        |       |       |       |       |       |        |
|--------|-------|-------|-------|-------|-------|--------|
| C(15)  | 48(2) | 50(3) | 57(2) | -7(2) | 20(2) | 0(2)   |
| C(16)  | 35(2) | 61(3) | 56(2) | 0(2)  | 10(2) | 2(2)   |
| C(17)  | 42(2) | 46(3) | 43(2) | -5(2) | 8(2)  | -5(2)  |
| C(18)  | 40(2) | 40(2) | 30(2) | 7(2)  | 9(1)  | 0(2)   |
| C(19)  | 44(2) | 69(3) | 58(3) | 12(2) | 3(2)  | -12(2) |
| C(1A)  | 57(2) | 61(3) | 42(2) | -4(2) | 14(2) | 7(2)   |
| C(2A)  | 64(2) | 53(3) | 46(2) | 0(2)  | 21(2) | -10(2) |
| C(3A)  | 37(2) | 36(2) | 44(2) | -4(2) | 19(1) | -1(2)  |
| C(4A)  | 35(2) | 34(2) | 42(2) | 0(2)  | 19(1) | 4(2)   |
| C(5A)  | 39(2) | 32(2) | 46(2) | 3(2)  | 20(2) | 2(2)   |
| C(6A)  | 45(2) | 34(2) | 46(2) | 0(2)  | 19(2) | 5(2)   |
| C(7A)  | 49(2) | 32(2) | 44(2) | 6(2)  | 25(2) | 12(2)  |
| C(8A)  | 59(2) | 32(2) | 53(2) | 5(2)  | 31(2) | 0(2)   |
| C(9A)  | 49(2) | 32(2) | 49(2) | -2(2) | 22(2) | -2(2)  |
| C(10A) | 68(2) | 46(3) | 47(2) | 7(2)  | 26(2) | 13(2)  |
| C(11A) | 48(2) | 43(3) | 35(2) | 10(2) | 18(2) | 11(2)  |
| C(12A) | 44(2) | 52(3) | 54(2) | 13(2) | 25(2) | 14(2)  |
| C(13A) | 37(2) | 38(2) | 35(2) | 6(2)  | 12(1) | 1(2)   |
| C(14A) | 53(2) | 42(3) | 47(2) | -9(2) | 20(2) | -10(2) |
| C(15A) | 54(2) | 47(3) | 58(3) | -1(2) | 28(2) | 6(2)   |
| C(16A) | 37(2) | 56(3) | 56(3) | -3(2) | 17(2) | 1(2)   |
| C(17A) | 41(2) | 43(3) | 43(2) | -3(2) | 11(2) | -5(2)  |
| C(18A) | 41(2) | 36(2) | 32(2) | 4(2)  | 14(1) | 0(2)   |
| C(19A) | 44(2) | 68(3) | 67(3) | 12(3) | 2(2)  | -20(2) |
| C(1B)  | 53(2) | 70(4) | 44(2) | -9(2) | 16(2) | 1(2)   |
| C(2B)  | 59(2) | 44(3) | 41(2) | 2(2)  | 17(2) | -2(2)  |
| C(3B)  | 36(2) | 35(2) | 42(2) | -3(2) | 18(1) | 0(2)   |
| C(4B)  | 34(2) | 29(2) | 42(2) | 2(2)  | 19(1) | 8(1)   |
| C(5B)  | 38(2) | 35(2) | 44(2) | 6(2)  | 18(1) | 2(2)   |
| C(6B)  | 42(2) | 33(2) | 43(2) | 4(2)  | 16(1) | 8(2)   |
| C(7B)  | 52(2) | 37(2) | 41(2) | 8(2)  | 24(2) | 15(2)  |
| C(8B)  | 60(2) | 30(2) | 53(2) | 10(2) | 29(2) | 6(2)   |
| C(9B)  | 50(2) | 31(2) | 51(2) | -2(2) | 25(2) | 1(2)   |
| C(10B) | 74(2) | 45(3) | 44(2) | 14(2) | 29(2) | 20(2)  |
| C(11B) | 50(2) | 45(3) | 42(2) | 10(2) | 21(2) | 8(2)   |
| C(12B) | 42(2) | 60(3) | 53(2) | 23(2) | 20(2) | 13(2)  |
| C(13B) | 38(2) | 42(2) | 36(2) | 9(2)  | 12(1) | -2(2)  |
| C(14B) | 57(2) | 42(3) | 44(2) | -1(2) | 19(2) | -2(2)  |

|        |       |       |       |        |       |        |
|--------|-------|-------|-------|--------|-------|--------|
| C(15B) | 52(2) | 48(3) | 60(3) | -7(2)  | 22(2) | 2(2)   |
| C(16B) | 36(2) | 64(3) | 54(3) | 2(3)   | 12(2) | 5(2)   |
| C(17B) | 42(2) | 52(3) | 44(2) | -4(2)  | 11(2) | -7(2)  |
| C(18B) | 42(2) | 40(2) | 32(2) | 7(2)   | 13(1) | 2(2)   |
| C(19B) | 53(2) | 76(3) | 63(3) | 18(3)  | -4(2) | -19(2) |
| C(1C)  | 50(2) | 52(3) | 35(2) | -3(2)  | 10(2) | 7(2)   |
| C(2C)  | 56(2) | 43(3) | 38(2) | 1(2)   | 12(2) | -2(2)  |
| C(3C)  | 36(2) | 35(2) | 37(2) | -4(2)  | 14(1) | 3(2)   |
| C(4C)  | 35(2) | 31(2) | 36(2) | -1(2)  | 14(1) | 4(1)   |
| C(5C)  | 40(2) | 27(2) | 40(2) | 4(2)   | 18(1) | 0(1)   |
| C(6C)  | 46(2) | 36(2) | 35(2) | 0(2)   | 16(1) | 0(2)   |
| C(7C)  | 47(2) | 31(2) | 36(2) | 2(2)   | 20(1) | 7(2)   |
| C(8C)  | 53(2) | 30(2) | 48(2) | 2(2)   | 27(2) | -1(2)  |
| C(9C)  | 44(2) | 30(2) | 44(2) | -2(2)  | 16(2) | -3(2)  |
| C(10C) | 58(2) | 37(2) | 37(2) | 2(2)   | 19(2) | 7(2)   |
| C(11C) | 45(2) | 40(2) | 27(2) | 6(2)   | 13(1) | 8(2)   |
| C(12C) | 43(2) | 52(3) | 39(2) | 7(2)   | 21(2) | 8(2)   |
| C(13C) | 36(2) | 39(2) | 26(2) | 6(2)   | 11(1) | -4(2)  |
| C(14C) | 50(2) | 37(2) | 38(2) | -8(2)  | 18(2) | -8(2)  |
| C(15C) | 45(2) | 47(3) | 51(2) | -3(2)  | 22(2) | 6(2)   |
| C(16C) | 38(2) | 53(3) | 54(2) | -1(2)  | 15(2) | 5(2)   |
| C(17C) | 39(2) | 46(3) | 35(2) | -2(2)  | 8(2)  | -2(2)  |
| C(18C) | 36(2) | 36(2) | 28(2) | 4(2)   | 12(1) | 0(2)   |
| C(19C) | 41(2) | 60(3) | 48(2) | -1(2)  | 12(2) | -15(2) |
| C(1D)  | 52(2) | 65(3) | 35(2) | 1(2)   | 10(2) | -5(2)  |
| C(2D)  | 62(2) | 43(3) | 41(2) | -4(2)  | 14(2) | 2(2)   |
| C(3D)  | 35(2) | 33(2) | 43(2) | 1(2)   | 15(1) | -2(2)  |
| C(4D)  | 37(2) | 26(2) | 38(2) | 2(2)   | 16(1) | -5(1)  |
| C(5D)  | 42(2) | 36(2) | 40(2) | -2(2)  | 21(1) | -1(2)  |
| C(6D)  | 45(2) | 37(2) | 40(2) | 2(2)   | 17(1) | -2(2)  |
| C(7D)  | 52(2) | 37(2) | 40(2) | -2(2)  | 24(2) | -13(2) |
| C(8D)  | 66(2) | 28(2) | 52(2) | -7(2)  | 32(2) | -5(2)  |
| C(9D)  | 54(2) | 30(2) | 49(2) | 0(2)   | 22(2) | 0(2)   |
| C(10D) | 86(3) | 35(2) | 36(2) | -6(2)  | 27(2) | -21(2) |
| C(11D) | 57(2) | 42(3) | 33(2) | -4(2)  | 21(2) | -6(2)  |
| C(12D) | 44(2) | 58(3) | 40(2) | -13(2) | 21(2) | -13(2) |
| C(13D) | 37(2) | 39(2) | 34(2) | -5(2)  | 16(1) | 3(2)   |
| C(14D) | 45(2) | 43(3) | 44(2) | 3(2)   | 21(2) | -1(2)  |

|        |       |       |       |        |       |        |
|--------|-------|-------|-------|--------|-------|--------|
| C(15D) | 45(2) | 51(3) | 66(3) | 7(2)   | 26(2) | -4(2)  |
| C(16D) | 37(2) | 69(4) | 67(3) | -1(3)  | 14(2) | -3(2)  |
| C(17D) | 47(2) | 54(3) | 42(2) | 6(2)   | 10(2) | 4(2)   |
| C(18D) | 45(2) | 38(2) | 32(2) | -4(2)  | 16(2) | -2(2)  |
| C(19D) | 44(2) | 58(3) | 50(2) | -6(2)  | 10(2) | 9(2)   |
| C(1E)  | 49(2) | 53(3) | 37(2) | 8(2)   | 9(2)  | 1(2)   |
| C(2E)  | 48(2) | 49(3) | 41(2) | 0(2)   | 9(2)  | 7(2)   |
| C(3E)  | 29(2) | 35(2) | 38(2) | 4(2)   | 8(1)  | 0(2)   |
| C(4E)  | 28(1) | 35(2) | 39(2) | -2(2)  | 13(1) | -4(2)  |
| C(5E)  | 35(2) | 30(2) | 41(2) | -5(2)  | 14(1) | 1(2)   |
| C(6E)  | 41(2) | 37(2) | 39(2) | 2(2)   | 11(1) | 1(2)   |
| C(7E)  | 50(2) | 36(2) | 42(2) | -3(2)  | 20(2) | -9(2)  |
| C(8E)  | 55(2) | 34(2) | 52(2) | -6(2)  | 27(2) | -1(2)  |
| C(9E)  | 44(2) | 34(2) | 47(2) | 4(2)   | 17(2) | 5(2)   |
| C(10E) | 81(3) | 57(3) | 44(2) | -11(2) | 25(2) | -19(2) |
| C(11E) | 53(2) | 50(3) | 32(2) | -13(2) | 14(2) | -14(2) |
| C(12E) | 46(2) | 53(3) | 47(2) | -14(2) | 18(2) | -12(2) |
| C(13E) | 38(2) | 43(2) | 35(2) | -5(2)  | 11(1) | 2(2)   |
| C(14E) | 59(2) | 47(3) | 50(2) | 9(2)   | 24(2) | 10(2)  |
| C(15E) | 48(2) | 58(3) | 67(3) | -4(2)  | 24(2) | -8(2)  |
| C(16E) | 40(2) | 60(3) | 64(3) | 0(3)   | 12(2) | -1(2)  |
| C(17E) | 46(2) | 45(3) | 45(2) | 0(2)   | 8(2)  | 2(2)   |
| C(18E) | 41(2) | 40(2) | 34(2) | -7(2)  | 12(1) | -2(2)  |
| C(19E) | 54(2) | 65(3) | 64(3) | -3(3)  | 6(2)  | 23(2)  |

---

**Table 5.** Hydrogen coordinates ( $\times 10^4$ ) and isotropic displacement parameters ( $\text{\AA}^2 \times 10^3$ ) for mo\_d8v211027\_0m.

|        | x     | y     | z    | U(eq) |
|--------|-------|-------|------|-------|
| H(1)   | 6621  | 561   | 1833 | 62    |
| H(2)   | 7326  | 5904  | 2553 | 53    |
| H(5)   | 7876  | 5272  | 3324 | 43    |
| H(6)   | 8232  | 4756  | 4047 | 44    |
| H(8)   | 7407  | -1485 | 3922 | 49    |
| H(9)   | 7050  | -989  | 3198 | 46    |
| H(10A) | 7855  | 82    | 4616 | 57    |
| H(10B) | 8467  | 229   | 4589 | 57    |
| H(12)  | 9101  | 3380  | 5077 | 55    |
| H(14)  | 8079  | 9334  | 5571 | 54    |
| H(15)  | 7095  | 9518  | 5297 | 61    |
| H(16)  | 6581  | 6837  | 4783 | 63    |
| H(17)  | 7029  | 3810  | 4548 | 54    |
| H(19A) | 9117  | 9096  | 5491 | 91    |
| H(19B) | 9520  | 6841  | 5581 | 91    |
| H(19C) | 9154  | 7360  | 5872 | 91    |
| H(1A)  | 9921  | 11118 | 9761 | 65    |
| H(2A)  | 9222  | 5697  | 9055 | 65    |
| H(5A)  | 8762  | 6157  | 8271 | 45    |
| H(6A)  | 8446  | 6596  | 7541 | 49    |
| H(8A)  | 9241  | 12902 | 7673 | 54    |
| H(9A)  | 9553  | 12497 | 8397 | 50    |
| H(10C) | 8208  | 11135 | 6993 | 62    |
| H(10D) | 8828  | 11360 | 6984 | 62    |
| H(12A) | 7613  | 7771  | 6511 | 58    |
| H(14A) | 8724  | 2042  | 6067 | 56    |
| H(15A) | 9697  | 2048  | 6357 | 61    |
| H(16A) | 10176 | 4839  | 6862 | 59    |
| H(17A) | 9688  | 7777  | 7079 | 52    |
| H(19D) | 7242  | 4498  | 5974 | 96    |

|        |      |       |       |     |
|--------|------|-------|-------|-----|
| H(19E) | 7625 | 2214  | 6138  | 96  |
| H(19F) | 7666 | 3673  | 5745  | 96  |
| H(1B)  | 98   | 819   | 5214  | 67  |
| H(2B)  | 878  | 6024  | 5947  | 58  |
| H(5B)  | 1446 | 5272  | 6713  | 46  |
| H(6B)  | 1783 | 4734  | 7435  | 47  |
| H(8B)  | 965  | -1522 | 7295  | 54  |
| H(9B)  | 619  | -1004 | 6571  | 51  |
| H(10E) | 1406 | -11   | 7992  | 63  |
| H(10F) | 2024 | 321   | 7983  | 63  |
| H(12B) | 2583 | 3497  | 8505  | 61  |
| H(14B) | 1432 | 9309  | 8890  | 57  |
| H(15B) | 457  | 9355  | 8558  | 63  |
| H(16B) | 13   | 6609  | 8035  | 63  |
| H(17B) | 523  | 3645  | 7844  | 57  |
| H(19G) | 2520 | 9179  | 8890  | 105 |
| H(19H) | 2925 | 6941  | 9032  | 105 |
| H(19I) | 2491 | 7533  | 9265  | 105 |
| H(1C)  | 6695 | 10878 | 6507  | 56  |
| H(2C)  | 5945 | 5585  | 5781  | 56  |
| H(5C)  | 5353 | 6362  | 5018  | 42  |
| H(6C)  | 4981 | 6932  | 4294  | 46  |
| H(8C)  | 5816 | 13156 | 4423  | 49  |
| H(9C)  | 6186 | 12620 | 5146  | 47  |
| H(10G) | 4754 | 11516 | 3753  | 52  |
| H(10H) | 5370 | 11678 | 3732  | 52  |
| H(12C) | 4125 | 8315  | 3251  | 52  |
| H(14C) | 5166 | 2441  | 2781  | 49  |
| H(15C) | 6146 | 2209  | 3072  | 56  |
| H(16C) | 6655 | 4900  | 3589  | 58  |
| H(17C) | 6202 | 7873  | 3830  | 50  |
| H(19J) | 4152 | 4114  | 2478  | 76  |
| H(19K) | 3721 | 5127  | 2687  | 76  |
| H(19L) | 4068 | 2774  | 2868  | 76  |
| H(1D)  | 6451 | 5499  | 11367 | 63  |
| H(2D)  | 5749 | 10929 | 10660 | 59  |
| H(5D)  | 5303 | 10462 | 9873  | 45  |
| H(6D)  | 5005 | 10049 | 9146  | 48  |



|        |      |       |       |    |
|--------|------|-------|-------|----|
| H(8D)  | 5791 | 3726  | 9282  | 55 |
| H(9D)  | 6083 | 4087  | 10010 | 52 |
| H(10I) | 5369 | 5257  | 8588  | 61 |
| H(10J) | 4750 | 5719  | 8585  | 61 |
| H(12D) | 4242 | 9009  | 8086  | 55 |
| H(14D) | 5454 | 14631 | 7727  | 51 |
| H(15D) | 6430 | 14529 | 8073  | 62 |
| H(16D) | 6838 | 11654 | 8579  | 70 |
| H(17D) | 6296 | 8755  | 8747  | 59 |
| H(19M) | 4373 | 14658 | 7713  | 78 |
| H(19N) | 3935 | 12521 | 7589  | 78 |
| H(19O) | 4358 | 12915 | 7338  | 78 |
| H(1E)  | 6902 | 5893  | 6953  | 58 |
| H(2E)  | 7654 | 630   | 7677  | 57 |
| H(5E)  | 8132 | 1160  | 8455  | 42 |
| H(6E)  | 8438 | 1598  | 9182  | 48 |
| H(8E)  | 7652 | 7937  | 9044  | 54 |
| H(9E)  | 7330 | 7489  | 8317  | 50 |
| H(10K) | 8688 | 5980  | 9740  | 72 |
| H(10L) | 8066 | 6450  | 9733  | 72 |
| H(12E) | 9196 | 2614  | 10258 | 58 |
| H(14E) | 7958 | -2920 | 10588 | 61 |
| H(15E) | 6994 | -2817 | 10234 | 68 |
| H(16E) | 6586 | 35    | 9718  | 68 |
| H(17E) | 7134 | 2931  | 9552  | 57 |
| H(19P) | 9481 | -705  | 10793 | 97 |
| H(19Q) | 9086 | -2931 | 10608 | 97 |
| H(19R) | 9008 | -1422 | 10983 | 97 |

---

—

**Table 6.** Torsion angles [°] for mo\_d8v211027\_0m.

---

|                         |           |
|-------------------------|-----------|
| C(2)-N(1)-C(1)-O(1)     | -0.2(5)   |
| C(3)-O(1)-C(1)-N(1)     | -0.2(4)   |
| C(1)-N(1)-C(2)-C(3)     | 0.6(4)    |
| N(1)-C(2)-C(3)-O(1)     | -0.7(4)   |
| N(1)-C(2)-C(3)-C(4)     | 179.6(3)  |
| C(1)-O(1)-C(3)-C(2)     | 0.5(4)    |
| C(1)-O(1)-C(3)-C(4)     | -179.7(3) |
| C(2)-C(3)-C(4)-C(5)     | -13.0(6)  |
| O(1)-C(3)-C(4)-C(5)     | 167.3(3)  |
| C(2)-C(3)-C(4)-C(9)     | 167.1(4)  |
| O(1)-C(3)-C(4)-C(9)     | -12.6(5)  |
| C(9)-C(4)-C(5)-C(6)     | 0.4(5)    |
| C(3)-C(4)-C(5)-C(6)     | -179.5(3) |
| C(4)-C(5)-C(6)-C(7)     | 0.0(5)    |
| C(5)-C(6)-C(7)-C(8)     | -0.5(5)   |
| C(5)-C(6)-C(7)-C(10)    | 176.5(3)  |
| C(6)-C(7)-C(8)-C(9)     | 0.5(5)    |
| C(10)-C(7)-C(8)-C(9)    | -176.5(3) |
| C(7)-C(8)-C(9)-C(4)     | -0.1(5)   |
| C(5)-C(4)-C(9)-C(8)     | -0.4(5)   |
| C(3)-C(4)-C(9)-C(8)     | 179.5(3)  |
| C(6)-C(7)-C(10)-C(11)   | 32.9(5)   |
| C(8)-C(7)-C(10)-C(11)   | -150.2(3) |
| C(7)-C(10)-C(11)-C(12)  | -113.3(4) |
| C(7)-C(10)-C(11)-C(18)  | 70.5(5)   |
| C(18)-C(11)-C(12)-N(2)  | -0.2(5)   |
| C(10)-C(11)-C(12)-N(2)  | -177.0(4) |
| C(13)-N(2)-C(12)-C(11)  | 1.4(4)    |
| C(19)-N(2)-C(12)-C(11)  | -176.1(4) |
| C(12)-N(2)-C(13)-C(18)  | -2.0(4)   |
| C(19)-N(2)-C(13)-C(18)  | 175.5(4)  |
| C(12)-N(2)-C(13)-C(14)  | -179.2(4) |
| C(19)-N(2)-C(13)-C(14)  | -1.7(7)   |
| N(2)-C(13)-C(14)-C(15)  | 176.6(4)  |
| C(18)-C(13)-C(14)-C(15) | -0.2(6)   |
| C(13)-C(14)-C(15)-C(16) | 0.0(6)    |

|                            |           |
|----------------------------|-----------|
| C(14)-C(15)-C(16)-C(17)    | 1.1(7)    |
| C(15)-C(16)-C(17)-C(18)    | -1.9(7)   |
| C(16)-C(17)-C(18)-C(13)    | 1.6(6)    |
| C(16)-C(17)-C(18)-C(11)    | -178.2(5) |
| N(2)-C(13)-C(18)-C(17)     | -178.0(4) |
| C(14)-C(13)-C(18)-C(17)    | -0.6(6)   |
| N(2)-C(13)-C(18)-C(11)     | 1.9(4)    |
| C(14)-C(13)-C(18)-C(11)    | 179.3(4)  |
| C(12)-C(11)-C(18)-C(17)    | 178.8(5)  |
| C(10)-C(11)-C(18)-C(17)    | -4.4(8)   |
| C(12)-C(11)-C(18)-C(13)    | -1.1(5)   |
| C(10)-C(11)-C(18)-C(13)    | 175.8(4)  |
| C(2A)-N(1A)-C(1A)-O(1A)    | 0.3(5)    |
| C(3A)-O(1A)-C(1A)-N(1A)    | -0.5(5)   |
| C(1A)-N(1A)-C(2A)-C(3A)    | 0.0(5)    |
| N(1A)-C(2A)-C(3A)-O(1A)    | -0.3(4)   |
| N(1A)-C(2A)-C(3A)-C(4A)    | -178.9(4) |
| C(1A)-O(1A)-C(3A)-C(2A)    | 0.4(4)    |
| C(1A)-O(1A)-C(3A)-C(4A)    | 179.4(3)  |
| C(2A)-C(3A)-C(4A)-C(9A)    | -171.0(4) |
| O(1A)-C(3A)-C(4A)-C(9A)    | 10.6(5)   |
| C(2A)-C(3A)-C(4A)-C(5A)    | 9.0(6)    |
| O(1A)-C(3A)-C(4A)-C(5A)    | -169.5(3) |
| C(9A)-C(4A)-C(5A)-C(6A)    | -0.8(5)   |
| C(3A)-C(4A)-C(5A)-C(6A)    | 179.2(3)  |
| C(4A)-C(5A)-C(6A)-C(7A)    | -0.2(5)   |
| C(5A)-C(6A)-C(7A)-C(8A)    | 1.5(5)    |
| C(5A)-C(6A)-C(7A)-C(10A)   | -175.2(3) |
| C(6A)-C(7A)-C(8A)-C(9A)    | -1.7(5)   |
| C(10A)-C(7A)-C(8A)-C(9A)   | 175.1(3)  |
| C(7A)-C(8A)-C(9A)-C(4A)    | 0.6(6)    |
| C(5A)-C(4A)-C(9A)-C(8A)    | 0.7(5)    |
| C(3A)-C(4A)-C(9A)-C(8A)    | -179.4(3) |
| C(8A)-C(7A)-C(10A)-C(11A)  | 149.8(4)  |
| C(6A)-C(7A)-C(10A)-C(11A)  | -33.6(5)  |
| C(7A)-C(10A)-C(11A)-C(12A) | 110.6(5)  |
| C(7A)-C(10A)-C(11A)-C(18A) | -70.8(5)  |
| C(13A)-N(2A)-C(12A)-C(11A) | 1.2(5)    |

|                             |           |
|-----------------------------|-----------|
| C(19A)-N(2A)-C(12A)-C(11A)  | 177.8(4)  |
| C(18A)-C(11A)-C(12A)-N(2A)  | -1.3(5)   |
| C(10A)-C(11A)-C(12A)-N(2A)  | 177.6(4)  |
| C(12A)-N(2A)-C(13A)-C(14A)  | 179.1(4)  |
| C(19A)-N(2A)-C(13A)-C(14A)  | 2.5(7)    |
| C(12A)-N(2A)-C(13A)-C(18A)  | -0.6(4)   |
| C(19A)-N(2A)-C(13A)-C(18A)  | -177.3(4) |
| N(2A)-C(13A)-C(14A)-C(15A)  | -178.0(4) |
| C(18A)-C(13A)-C(14A)-C(15A) | 1.7(6)    |
| C(13A)-C(14A)-C(15A)-C(16A) | -0.4(7)   |
| C(14A)-C(15A)-C(16A)-C(17A) | -0.9(7)   |
| C(15A)-C(16A)-C(17A)-C(18A) | 0.8(7)    |
| C(16A)-C(17A)-C(18A)-C(13A) | 0.5(6)    |
| C(16A)-C(17A)-C(18A)-C(11A) | 178.1(4)  |
| N(2A)-C(13A)-C(18A)-C(17A)  | 178.0(4)  |
| C(14A)-C(13A)-C(18A)-C(17A) | -1.8(6)   |
| N(2A)-C(13A)-C(18A)-C(11A)  | -0.2(4)   |
| C(14A)-C(13A)-C(18A)-C(11A) | -180.0(4) |
| C(12A)-C(11A)-C(18A)-C(17A) | -176.9(4) |
| C(10A)-C(11A)-C(18A)-C(17A) | 4.2(7)    |
| C(12A)-C(11A)-C(18A)-C(13A) | 0.9(4)    |
| C(10A)-C(11A)-C(18A)-C(13A) | -178.0(4) |
| C(2B)-N(1B)-C(1B)-O(1B)     | -0.7(5)   |
| C(3B)-O(1B)-C(1B)-N(1B)     | 0.7(5)    |
| C(1B)-N(1B)-C(2B)-C(3B)     | 0.5(4)    |
| N(1B)-C(2B)-C(3B)-O(1B)     | 0.0(4)    |
| N(1B)-C(2B)-C(3B)-C(4B)     | -178.5(3) |
| C(1B)-O(1B)-C(3B)-C(2B)     | -0.4(4)   |
| C(1B)-O(1B)-C(3B)-C(4B)     | 178.4(3)  |
| C(2B)-C(3B)-C(4B)-C(9B)     | 166.7(4)  |
| O(1B)-C(3B)-C(4B)-C(9B)     | -11.7(5)  |
| C(2B)-C(3B)-C(4B)-C(5B)     | -12.0(6)  |
| O(1B)-C(3B)-C(4B)-C(5B)     | 169.6(3)  |
| C(9B)-C(4B)-C(5B)-C(6B)     | -1.2(5)   |
| C(3B)-C(4B)-C(5B)-C(6B)     | 177.5(3)  |
| C(4B)-C(5B)-C(6B)-C(7B)     | 1.2(5)    |
| C(5B)-C(6B)-C(7B)-C(8B)     | -1.0(5)   |
| C(5B)-C(6B)-C(7B)-C(10B)    | 177.9(3)  |

|                             |           |
|-----------------------------|-----------|
| C(6B)-C(7B)-C(8B)-C(9B)     | 0.8(5)    |
| C(10B)-C(7B)-C(8B)-C(9B)    | -178.1(3) |
| C(7B)-C(8B)-C(9B)-C(4B)     | -0.8(5)   |
| C(5B)-C(4B)-C(9B)-C(8B)     | 1.0(5)    |
| C(3B)-C(4B)-C(9B)-C(8B)     | -177.7(3) |
| C(8B)-C(7B)-C(10B)-C(11B)   | -145.7(4) |
| C(6B)-C(7B)-C(10B)-C(11B)   | 35.4(5)   |
| C(7B)-C(10B)-C(11B)-C(12B)  | -116.1(5) |
| C(7B)-C(10B)-C(11B)-C(18B)  | 65.8(5)   |
| C(18B)-C(11B)-C(12B)-N(2B)  | 0.6(5)    |
| C(10B)-C(11B)-C(12B)-N(2B)  | -177.8(4) |
| C(13B)-N(2B)-C(12B)-C(11B)  | 0.7(5)    |
| C(19B)-N(2B)-C(12B)-C(11B)  | -176.9(4) |
| C(12B)-N(2B)-C(13B)-C(18B)  | -1.7(4)   |
| C(19B)-N(2B)-C(13B)-C(18B)  | 175.9(4)  |
| C(12B)-N(2B)-C(13B)-C(14B)  | -178.5(4) |
| C(19B)-N(2B)-C(13B)-C(14B)  | -0.9(7)   |
| N(2B)-C(13B)-C(14B)-C(15B)  | 176.7(4)  |
| C(18B)-C(13B)-C(14B)-C(15B) | 0.4(6)    |
| C(13B)-C(14B)-C(15B)-C(16B) | -0.5(7)   |
| C(14B)-C(15B)-C(16B)-C(17B) | 1.0(7)    |
| C(15B)-C(16B)-C(17B)-C(18B) | -1.3(7)   |
| C(16B)-C(17B)-C(18B)-C(13B) | 1.2(6)    |
| C(16B)-C(17B)-C(18B)-C(11B) | -178.6(5) |
| N(2B)-C(13B)-C(18B)-C(17B)  | -177.7(4) |
| C(14B)-C(13B)-C(18B)-C(17B) | -0.7(6)   |
| N(2B)-C(13B)-C(18B)-C(11B)  | 2.1(5)    |
| C(14B)-C(13B)-C(18B)-C(11B) | 179.1(4)  |
| C(12B)-C(11B)-C(18B)-C(17B) | 178.1(5)  |
| C(10B)-C(11B)-C(18B)-C(17B) | -3.5(8)   |
| C(12B)-C(11B)-C(18B)-C(13B) | -1.7(5)   |
| C(10B)-C(11B)-C(18B)-C(13B) | 176.8(4)  |
| C(2C)-N(1C)-C(1C)-O(1C)     | -0.9(5)   |
| C(3C)-O(1C)-C(1C)-N(1C)     | 0.8(4)    |
| C(1C)-N(1C)-C(2C)-C(3C)     | 0.6(4)    |
| N(1C)-C(2C)-C(3C)-O(1C)     | -0.1(4)   |
| N(1C)-C(2C)-C(3C)-C(4C)     | 178.2(3)  |
| C(1C)-O(1C)-C(3C)-C(2C)     | -0.4(4)   |

|                             |           |
|-----------------------------|-----------|
| C(1C)-O(1C)-C(3C)-C(4C)     | -179.0(3) |
| C(2C)-C(3C)-C(4C)-C(9C)     | -165.1(4) |
| O(1C)-C(3C)-C(4C)-C(9C)     | 13.0(5)   |
| C(2C)-C(3C)-C(4C)-C(5C)     | 13.9(6)   |
| O(1C)-C(3C)-C(4C)-C(5C)     | -167.9(3) |
| C(9C)-C(4C)-C(5C)-C(6C)     | 0.3(5)    |
| C(3C)-C(4C)-C(5C)-C(6C)     | -178.8(3) |
| C(4C)-C(5C)-C(6C)-C(7C)     | -0.2(5)   |
| C(5C)-C(6C)-C(7C)-C(8C)     | 0.4(5)    |
| C(5C)-C(6C)-C(7C)-C(10C)    | -177.9(3) |
| C(6C)-C(7C)-C(8C)-C(9C)     | -0.5(5)   |
| C(10C)-C(7C)-C(8C)-C(9C)    | 177.8(3)  |
| C(7C)-C(8C)-C(9C)-C(4C)     | 0.6(6)    |
| C(5C)-C(4C)-C(9C)-C(8C)     | -0.5(5)   |
| C(3C)-C(4C)-C(9C)-C(8C)     | 178.6(3)  |
| C(8C)-C(7C)-C(10C)-C(11C)   | 148.8(3)  |
| C(6C)-C(7C)-C(10C)-C(11C)   | -32.9(5)  |
| C(7C)-C(10C)-C(11C)-C(12C)  | 113.7(4)  |
| C(7C)-C(10C)-C(11C)-C(18C)  | -69.1(5)  |
| C(13C)-N(2C)-C(12C)-C(11C)  | 1.3(4)    |
| C(19C)-N(2C)-C(12C)-C(11C)  | 176.8(4)  |
| C(18C)-C(11C)-C(12C)-N(2C)  | -1.1(4)   |
| C(10C)-C(11C)-C(12C)-N(2C)  | 176.5(4)  |
| C(12C)-N(2C)-C(13C)-C(14C)  | -179.1(4) |
| C(19C)-N(2C)-C(13C)-C(14C)  | 5.3(6)    |
| C(12C)-N(2C)-C(13C)-C(18C)  | -1.0(4)   |
| C(19C)-N(2C)-C(13C)-C(18C)  | -176.6(3) |
| N(2C)-C(13C)-C(14C)-C(15C)  | -179.3(4) |
| C(18C)-C(13C)-C(14C)-C(15C) | 2.8(6)    |
| C(13C)-C(14C)-C(15C)-C(16C) | -1.2(6)   |
| C(14C)-C(15C)-C(16C)-C(17C) | -0.2(7)   |
| C(15C)-C(16C)-C(17C)-C(18C) | 0.1(6)    |
| C(16C)-C(17C)-C(18C)-C(13C) | 1.5(6)    |
| C(16C)-C(17C)-C(18C)-C(11C) | 179.4(4)  |
| N(2C)-C(13C)-C(18C)-C(17C)  | 178.7(3)  |
| C(14C)-C(13C)-C(18C)-C(17C) | -3.0(6)   |
| N(2C)-C(13C)-C(18C)-C(11C)  | 0.3(4)    |
| C(14C)-C(13C)-C(18C)-C(11C) | 178.6(3)  |

|                             |           |
|-----------------------------|-----------|
| C(12C)-C(11C)-C(18C)-C(17C) | -177.6(4) |
| C(10C)-C(11C)-C(18C)-C(17C) | 4.7(7)    |
| C(12C)-C(11C)-C(18C)-C(13C) | 0.5(4)    |
| C(10C)-C(11C)-C(18C)-C(13C) | -177.2(3) |
| C(2D)-N(1D)-C(1D)-O(1D)     | -0.1(5)   |
| C(3D)-O(1D)-C(1D)-N(1D)     | -0.2(4)   |
| C(1D)-N(1D)-C(2D)-C(3D)     | 0.4(5)    |
| N(1D)-C(2D)-C(3D)-O(1D)     | -0.6(4)   |
| N(1D)-C(2D)-C(3D)-C(4D)     | 179.8(4)  |
| C(1D)-O(1D)-C(3D)-C(2D)     | 0.5(4)    |
| C(1D)-O(1D)-C(3D)-C(4D)     | -179.8(3) |
| C(2D)-C(3D)-C(4D)-C(9D)     | 170.8(4)  |
| O(1D)-C(3D)-C(4D)-C(9D)     | -8.8(5)   |
| C(2D)-C(3D)-C(4D)-C(5D)     | -9.0(6)   |
| O(1D)-C(3D)-C(4D)-C(5D)     | 171.4(3)  |
| C(9D)-C(4D)-C(5D)-C(6D)     | 0.5(5)    |
| C(3D)-C(4D)-C(5D)-C(6D)     | -179.7(3) |
| C(4D)-C(5D)-C(6D)-C(7D)     | 0.2(5)    |
| C(5D)-C(6D)-C(7D)-C(8D)     | -1.3(5)   |
| C(5D)-C(6D)-C(7D)-C(10D)    | 175.3(3)  |
| C(6D)-C(7D)-C(8D)-C(9D)     | 1.8(6)    |
| C(10D)-C(7D)-C(8D)-C(9D)    | -174.8(3) |
| C(7D)-C(8D)-C(9D)-C(4D)     | -1.1(6)   |
| C(5D)-C(4D)-C(9D)-C(8D)     | 0.0(5)    |
| C(3D)-C(4D)-C(9D)-C(8D)     | -179.8(3) |
| C(8D)-C(7D)-C(10D)-C(11D)   | -145.4(4) |
| C(6D)-C(7D)-C(10D)-C(11D)   | 38.1(5)   |
| C(7D)-C(10D)-C(11D)-C(12D)  | -115.2(5) |
| C(7D)-C(10D)-C(11D)-C(18D)  | 67.0(5)   |
| C(18D)-C(11D)-C(12D)-N(2D)  | 0.4(5)    |
| C(10D)-C(11D)-C(12D)-N(2D)  | -177.7(4) |
| C(13D)-N(2D)-C(12D)-C(11D)  | 0.3(5)    |
| C(19D)-N(2D)-C(12D)-C(11D)  | -177.5(4) |
| C(12D)-N(2D)-C(13D)-C(14D)  | -178.1(4) |
| C(19D)-N(2D)-C(13D)-C(14D)  | -0.3(6)   |
| C(12D)-N(2D)-C(13D)-C(18D)  | -0.9(4)   |
| C(19D)-N(2D)-C(13D)-C(18D)  | 176.9(4)  |
| N(2D)-C(13D)-C(14D)-C(15D)  | 176.1(4)  |

|                             |           |
|-----------------------------|-----------|
| C(18D)-C(13D)-C(14D)-C(15D) | -0.7(6)   |
| C(13D)-C(14D)-C(15D)-C(16D) | 0.4(7)    |
| C(14D)-C(15D)-C(16D)-C(17D) | 0.6(7)    |
| C(15D)-C(16D)-C(17D)-C(18D) | -1.4(7)   |
| C(16D)-C(17D)-C(18D)-C(13D) | 1.2(6)    |
| C(16D)-C(17D)-C(18D)-C(11D) | -177.0(5) |
| N(2D)-C(13D)-C(18D)-C(17D)  | -177.5(4) |
| C(14D)-C(13D)-C(18D)-C(17D) | -0.1(6)   |
| N(2D)-C(13D)-C(18D)-C(11D)  | 1.2(4)    |
| C(14D)-C(13D)-C(18D)-C(11D) | 178.5(4)  |
| C(12D)-C(11D)-C(18D)-C(17D) | 177.3(5)  |
| C(10D)-C(11D)-C(18D)-C(17D) | -4.5(8)   |
| C(12D)-C(11D)-C(18D)-C(13D) | -1.0(5)   |
| C(10D)-C(11D)-C(18D)-C(13D) | 177.2(4)  |
| C(2E)-N(1E)-C(1E)-O(1E)     | 0.1(5)    |
| C(3E)-O(1E)-C(1E)-N(1E)     | 0.0(4)    |
| C(1E)-N(1E)-C(2E)-C(3E)     | -0.2(5)   |
| N(1E)-C(2E)-C(3E)-O(1E)     | 0.2(4)    |
| N(1E)-C(2E)-C(3E)-C(4E)     | 179.2(3)  |
| C(1E)-O(1E)-C(3E)-C(2E)     | -0.1(4)   |
| C(1E)-O(1E)-C(3E)-C(4E)     | -179.3(3) |
| C(2E)-C(3E)-C(4E)-C(9E)     | -169.3(4) |
| O(1E)-C(3E)-C(4E)-C(9E)     | 9.7(5)    |
| C(2E)-C(3E)-C(4E)-C(5E)     | 8.8(6)    |
| O(1E)-C(3E)-C(4E)-C(5E)     | -172.2(3) |
| C(9E)-C(4E)-C(5E)-C(6E)     | -0.4(5)   |
| C(3E)-C(4E)-C(5E)-C(6E)     | -178.6(3) |
| C(4E)-C(5E)-C(6E)-C(7E)     | -0.9(5)   |
| C(5E)-C(6E)-C(7E)-C(8E)     | 1.5(5)    |
| C(5E)-C(6E)-C(7E)-C(10E)    | -176.1(3) |
| C(6E)-C(7E)-C(8E)-C(9E)     | -0.9(5)   |
| C(10E)-C(7E)-C(8E)-C(9E)    | 176.8(4)  |
| C(7E)-C(8E)-C(9E)-C(4E)     | -0.4(6)   |
| C(5E)-C(4E)-C(9E)-C(8E)     | 1.1(5)    |
| C(3E)-C(4E)-C(9E)-C(8E)     | 179.2(3)  |
| C(8E)-C(7E)-C(10E)-C(11E)   | 144.5(4)  |
| C(6E)-C(7E)-C(10E)-C(11E)   | -37.9(5)  |
| C(7E)-C(10E)-C(11E)-C(12E)  | 116.2(5)  |



|                             |           |
|-----------------------------|-----------|
| C(7E)-C(10E)-C(11E)-C(18E)  | -67.0(6)  |
| C(13E)-N(2E)-C(12E)-C(11E)  | 0.8(5)    |
| C(19E)-N(2E)-C(12E)-C(11E)  | 177.7(4)  |
| C(18E)-C(11E)-C(12E)-N(2E)  | -0.6(5)   |
| C(10E)-C(11E)-C(12E)-N(2E)  | 176.7(4)  |
| C(12E)-N(2E)-C(13E)-C(14E)  | 178.8(4)  |
| C(19E)-N(2E)-C(13E)-C(14E)  | 1.8(7)    |
| C(12E)-N(2E)-C(13E)-C(18E)  | -0.7(4)   |
| C(19E)-N(2E)-C(13E)-C(18E)  | -177.7(4) |
| N(2E)-C(13E)-C(14E)-C(15E)  | -177.6(4) |
| C(18E)-C(13E)-C(14E)-C(15E) | 1.8(6)    |
| C(13E)-C(14E)-C(15E)-C(16E) | -0.6(7)   |
| C(14E)-C(15E)-C(16E)-C(17E) | -0.9(7)   |
| C(15E)-C(16E)-C(17E)-C(18E) | 1.0(7)    |
| C(16E)-C(17E)-C(18E)-C(11E) | 176.9(5)  |
| C(16E)-C(17E)-C(18E)-C(13E) | 0.2(6)    |
| C(12E)-C(11E)-C(18E)-C(17E) | -176.8(5) |
| C(10E)-C(11E)-C(18E)-C(17E) | 5.9(8)    |
| C(12E)-C(11E)-C(18E)-C(13E) | 0.1(4)    |
| C(10E)-C(11E)-C(18E)-C(13E) | -177.2(4) |
| N(2E)-C(13E)-C(18E)-C(17E)  | 177.9(4)  |
| C(14E)-C(13E)-C(18E)-C(17E) | -1.7(6)   |
| N(2E)-C(13E)-C(18E)-C(11E)  | 0.4(4)    |
| C(14E)-C(13E)-C(18E)-C(11E) | -179.2(4) |

---

Symmetry transformations used to generate equivalent atoms:

**Table 7.** Hydrogen bonds for mo\_d8v211027\_0m [Å and °].

| D-H...A               | d(D-H) | d(H...A) | d(D...A) | <(DHA) |
|-----------------------|--------|----------|----------|--------|
| C(1E)-H(1E)...N(1C)   | 0.94   | 2.39     | 3.327(6) | 172.0  |
| C(1D)-H(1D)...N(1)#1  | 0.94   | 2.41     | 3.337(6) | 169.8  |
| C(1C)-H(1C)...N(1E)#2 | 0.94   | 2.42     | 3.359(6) | 173.6  |
| C(1B)-H(1B)...N(1B)#3 | 0.94   | 2.39     | 3.331(5) | 174.9  |
| C(1A)-H(1A)...N(1A)#4 | 0.94   | 2.43     | 3.357(5) | 170.2  |
| C(1)-H(1)...N(1D)#5   | 0.94   | 2.42     | 3.358(6) | 172.1  |
| C(1E)-H(1E)...N(1C)   | 0.94   | 2.39     | 3.327(6) | 172.0  |
| C(1D)-H(1D)...N(1)#1  | 0.94   | 2.41     | 3.337(6) | 169.8  |
| C(1C)-H(1C)...N(1E)#2 | 0.94   | 2.42     | 3.359(6) | 173.6  |
| C(1B)-H(1B)...N(1B)#3 | 0.94   | 2.39     | 3.331(5) | 174.9  |
| C(1A)-H(1A)...N(1A)#4 | 0.94   | 2.43     | 3.357(5) | 170.2  |
| C(1)-H(1)...N(1D)#5   | 0.94   | 2.42     | 3.358(6) | 172.1  |
| C(1)-H(1)...N(1D)#5   | 0.94   | 2.42     | 3.358(6) | 172.1  |
| C(1A)-H(1A)...N(1A)#4 | 0.94   | 2.43     | 3.357(5) | 170.2  |
| C(1B)-H(1B)...N(1B)#3 | 0.94   | 2.39     | 3.331(5) | 174.9  |
| C(1C)-H(1C)...N(1E)#2 | 0.94   | 2.42     | 3.359(6) | 173.6  |
| C(1D)-H(1D)...N(1)#1  | 0.94   | 2.41     | 3.337(6) | 169.8  |
| C(1E)-H(1E)...N(1C)   | 0.94   | 2.39     | 3.327(6) | 172.0  |
| C(1)-H(1)...N(1D)#5   | 0.94   | 2.42     | 3.358(6) | 172.1  |
| C(1A)-H(1A)...N(1A)#4 | 0.94   | 2.43     | 3.357(5) | 170.2  |
| C(1B)-H(1B)...N(1B)#3 | 0.94   | 2.39     | 3.331(5) | 174.9  |
| C(1C)-H(1C)...N(1E)#2 | 0.94   | 2.42     | 3.359(6) | 173.6  |
| C(1D)-H(1D)...N(1)#1  | 0.94   | 2.41     | 3.337(6) | 169.8  |
| C(1E)-H(1E)...N(1C)   | 0.94   | 2.39     | 3.327(6) | 172.0  |

Symmetry transformations used to generate equivalent atoms:

#1  $x, y, z+1$     #2  $x, y+1, z$     #3  $-x, y-1/2, -z+1$     #4  $-x+2, y+1/2, -z+2$

#5  $x, y-1, z-1$

## 10. References

- [1] N. T. Chandrika, M. Y. Fosso, Y. Alimova, A. May, O. A. Gonzalez, S. Garneau-Tsodikova, *Med. Chem. Comm.* **2019**, *10*, 926–933.
- [2] S. Nomiya, T. Hondo, T. Tsuchimoto, *Adv. Syn. Cat.* **2016**, *358*, 1136–1149.
- [3] H. Hikawa, F. Kotaki, S. Kikkawa, I. Azumaya, *J. Org. Chem.* **2019**, *84*, 1972–1979.
- [4] C. C. Kofink, P. Knochel, *Org. Lett.* **2006**, *8*, 4121–4124.

## 11. $^1\text{H}$ NMR, $^{13}\text{C}\{^1\text{H}\}$ NMR, $^{19}\text{F}$ NMR Spectra

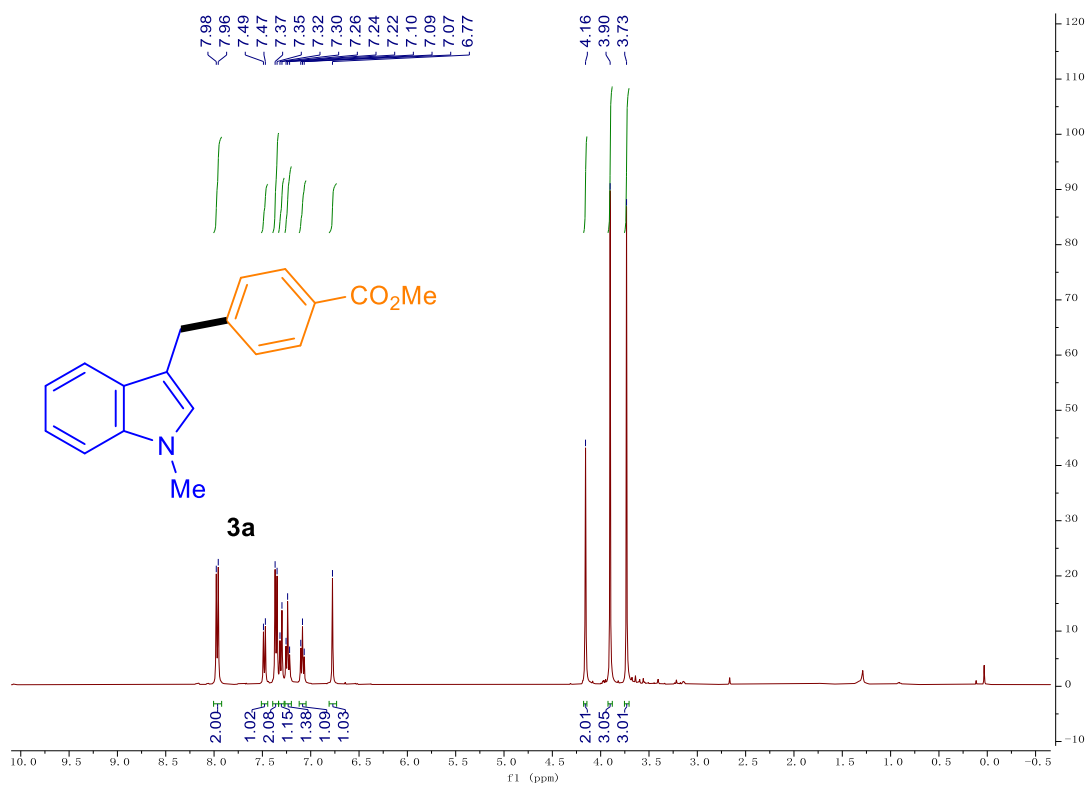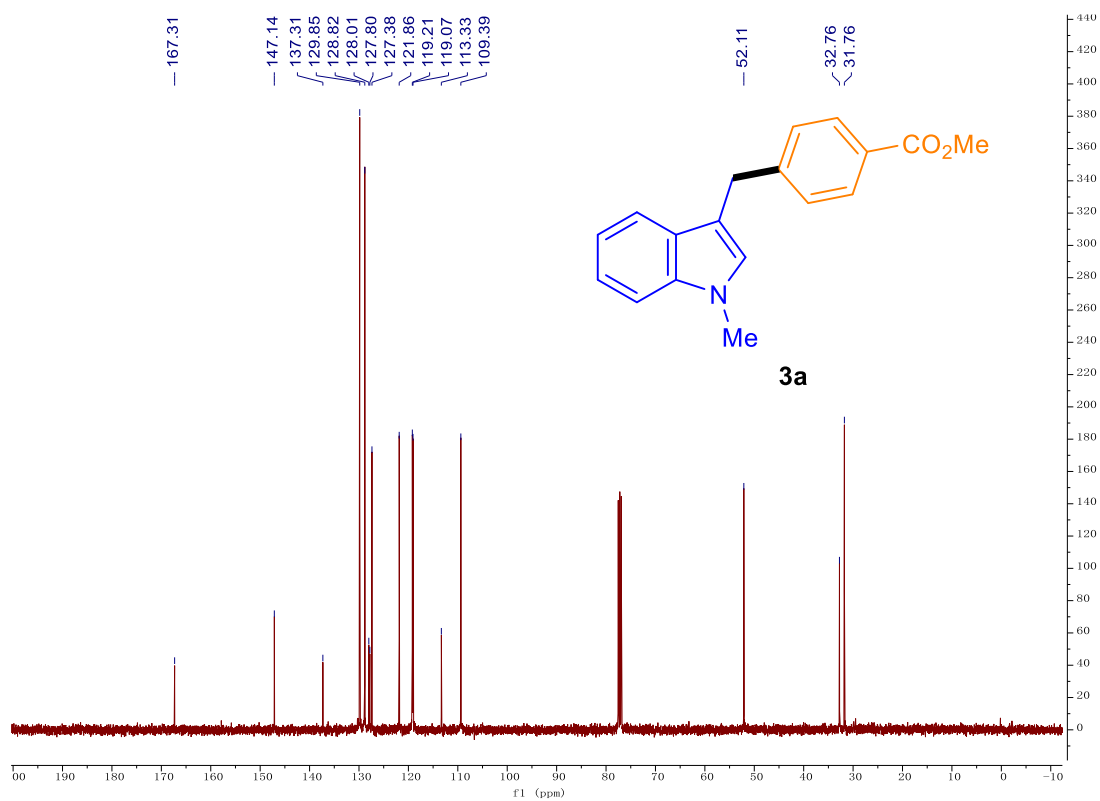

$^1\text{H}$  NMR (400 MHz) and  $^{13}\text{C}\{^1\text{H}\}$  NMR (100 MHz) spectra of **3a** ( $\text{CDCl}_3$ , rt).

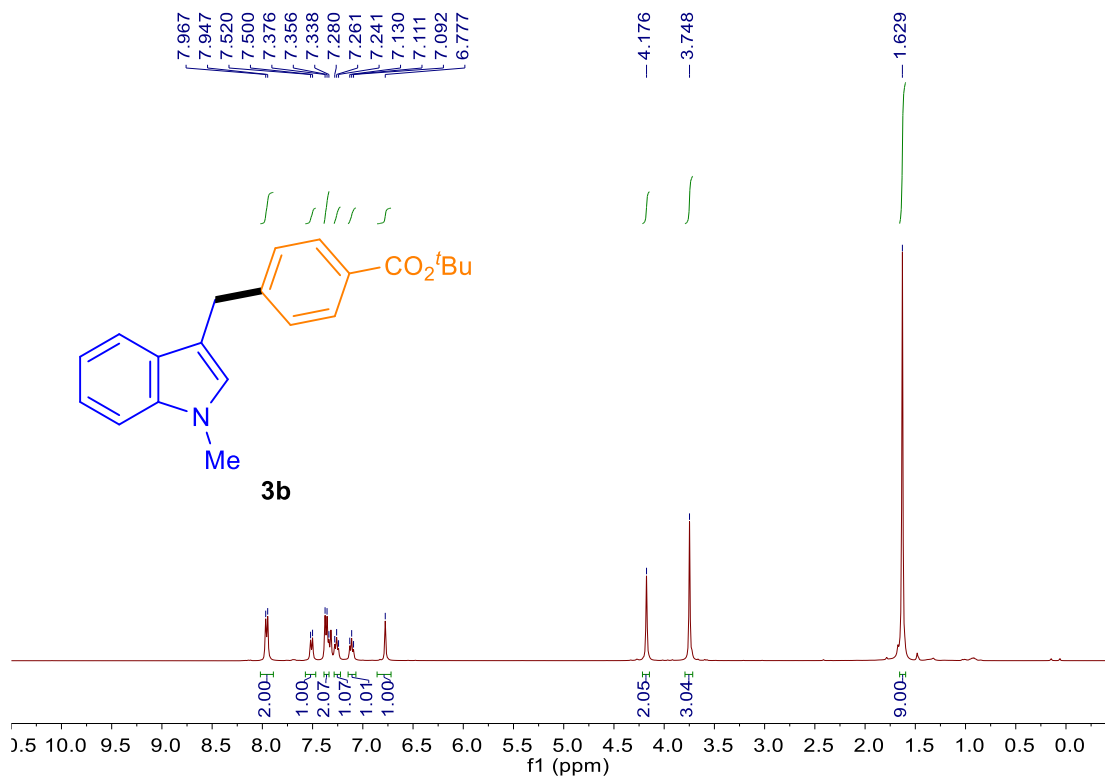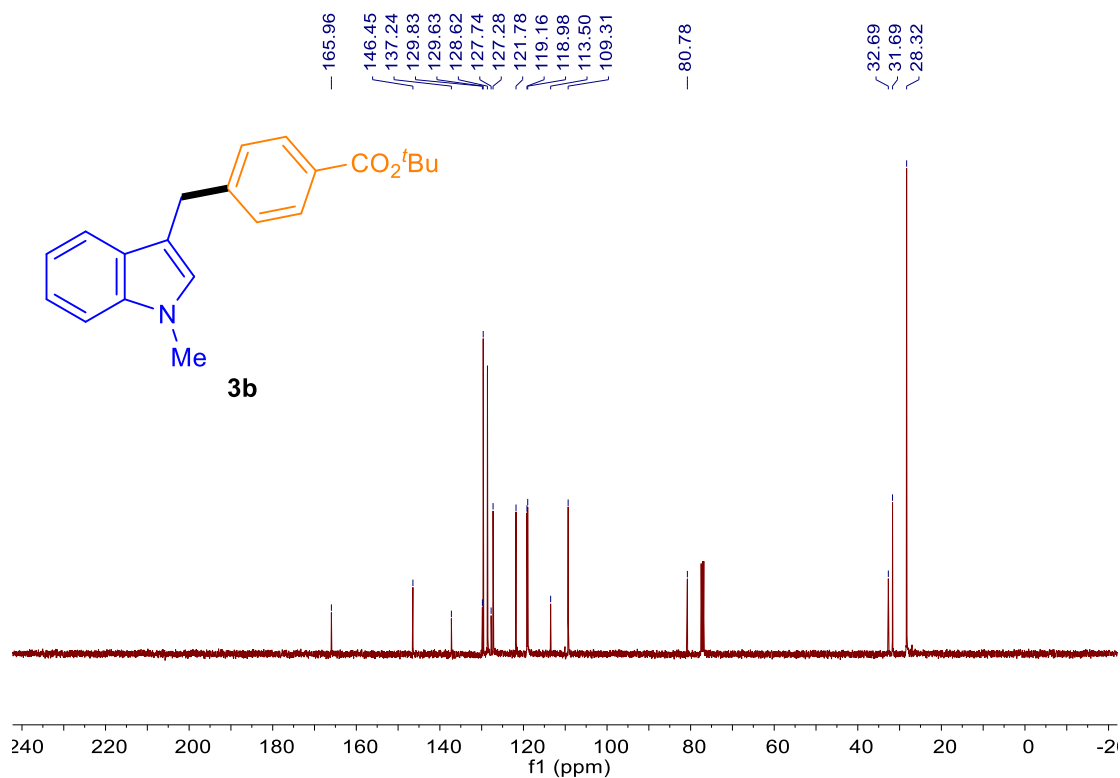

<sup>1</sup>H NMR (400 MHz) and <sup>13</sup>C{<sup>1</sup>H} NMR (100 MHz) spectra of **3b** (CDCl<sub>3</sub>, rt).

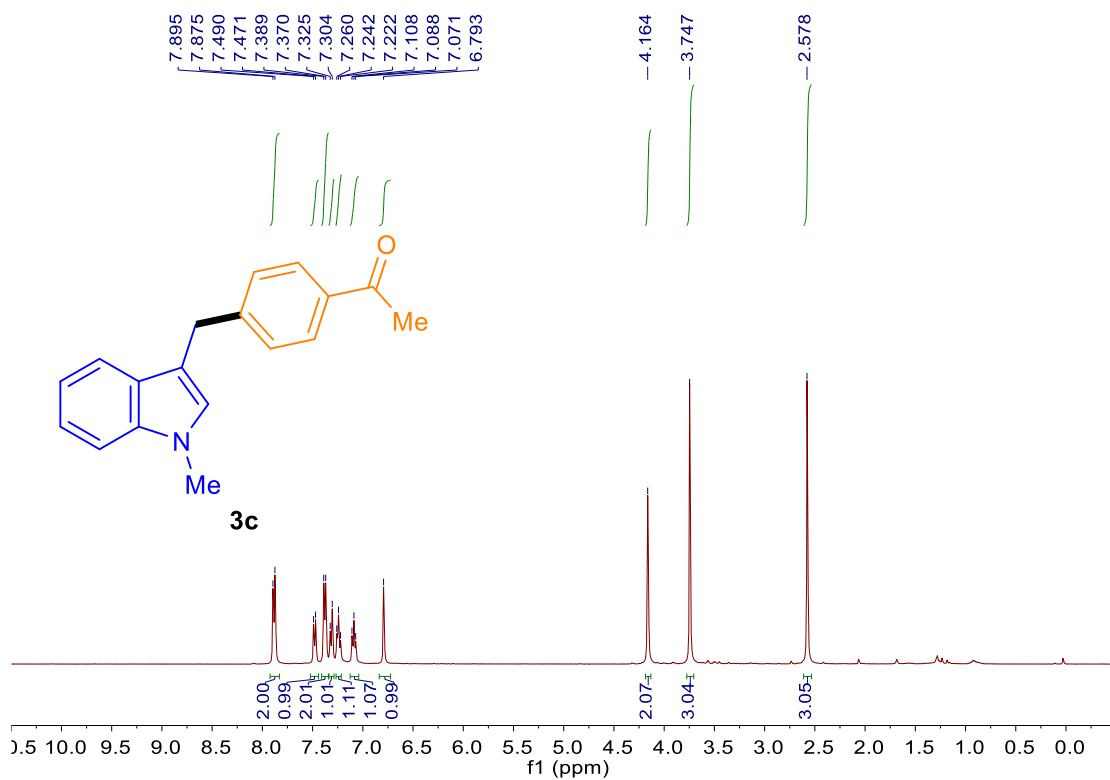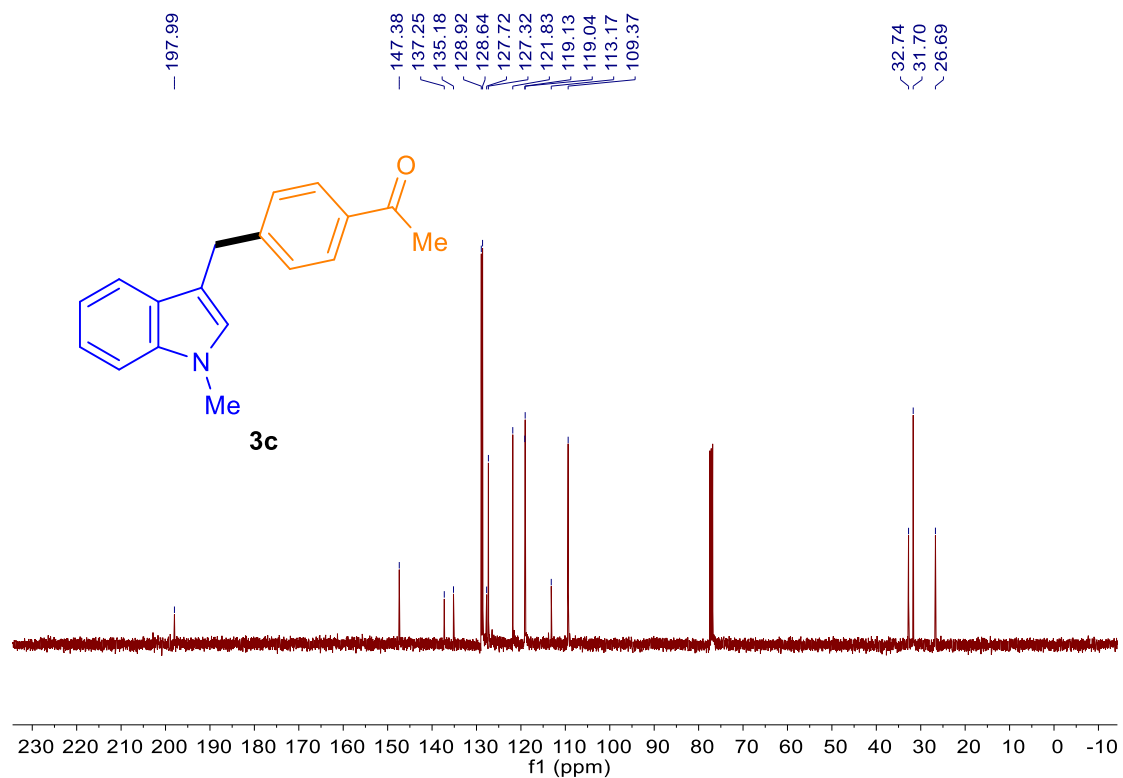

<sup>1</sup>H NMR (400 MHz) and <sup>13</sup>C{<sup>1</sup>H} NMR (100 MHz) spectra of **3c** (CDCl<sub>3</sub>, rt).

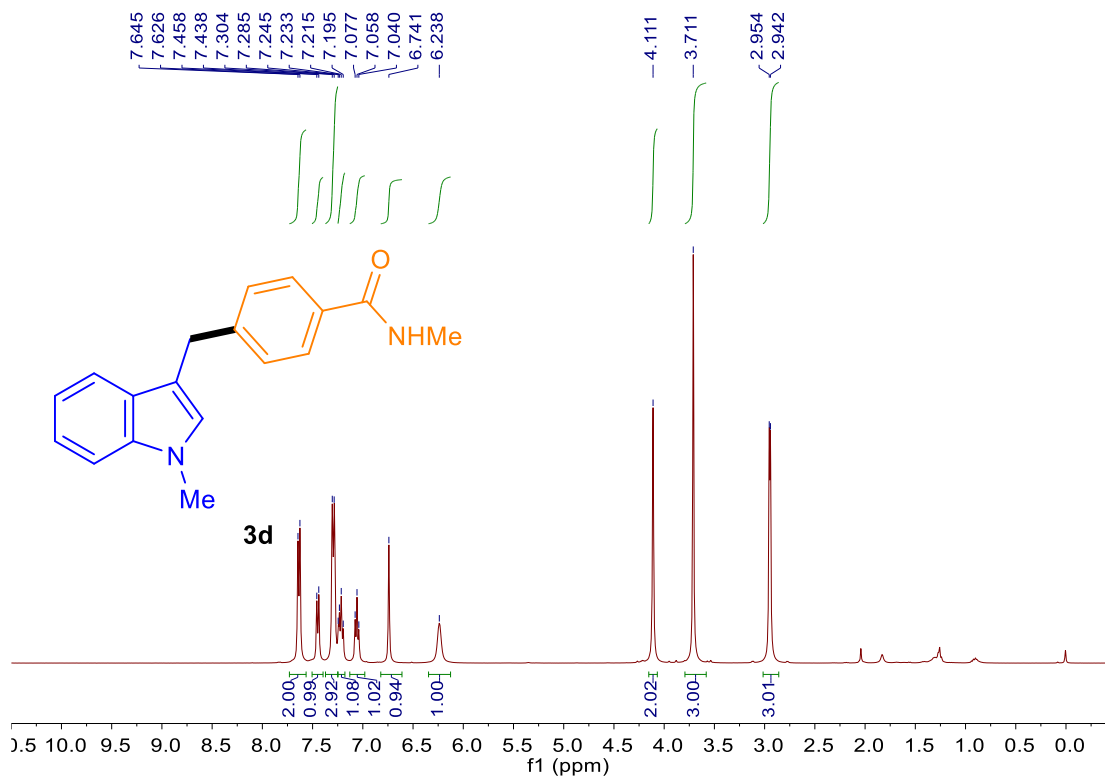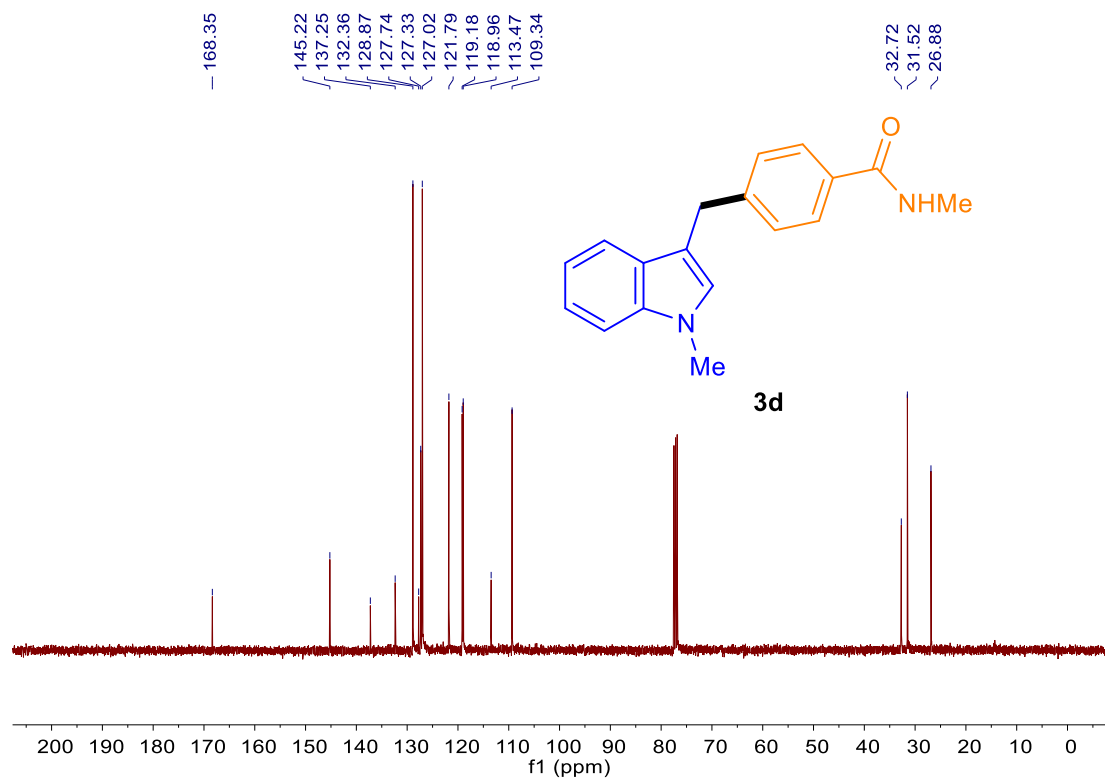

<sup>1</sup>H NMR (400 MHz) and <sup>13</sup>C{<sup>1</sup>H} NMR (100 MHz) spectra of **3d** (CDCl<sub>3</sub>, rt).

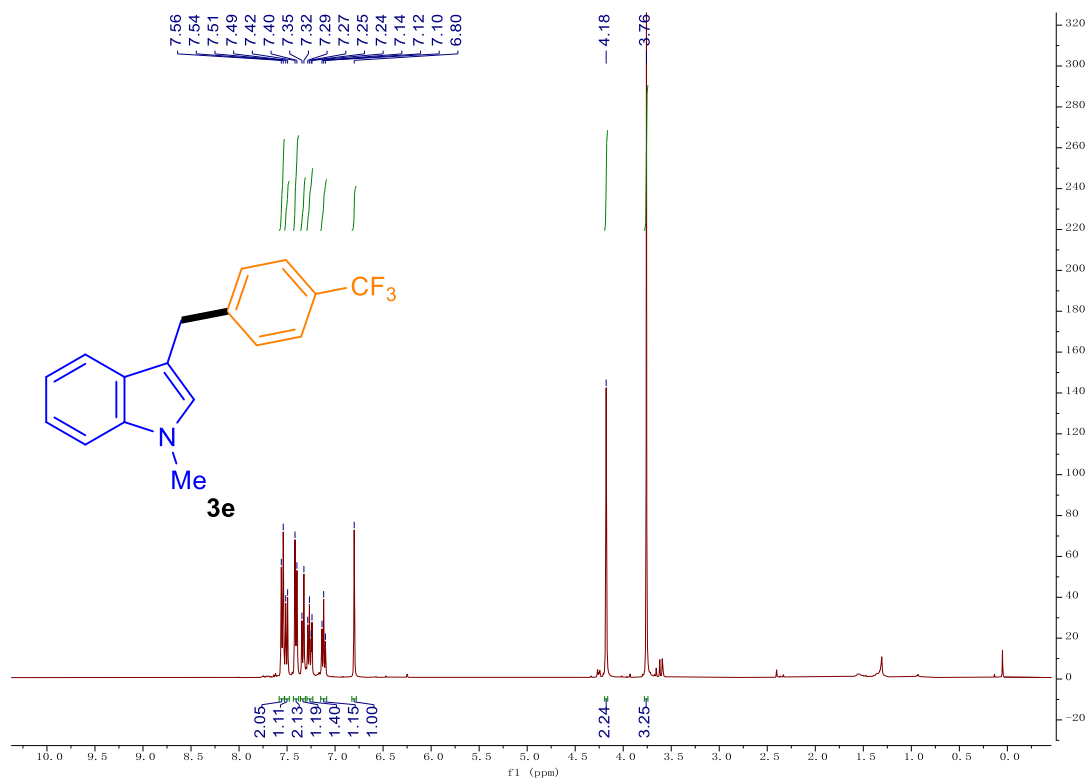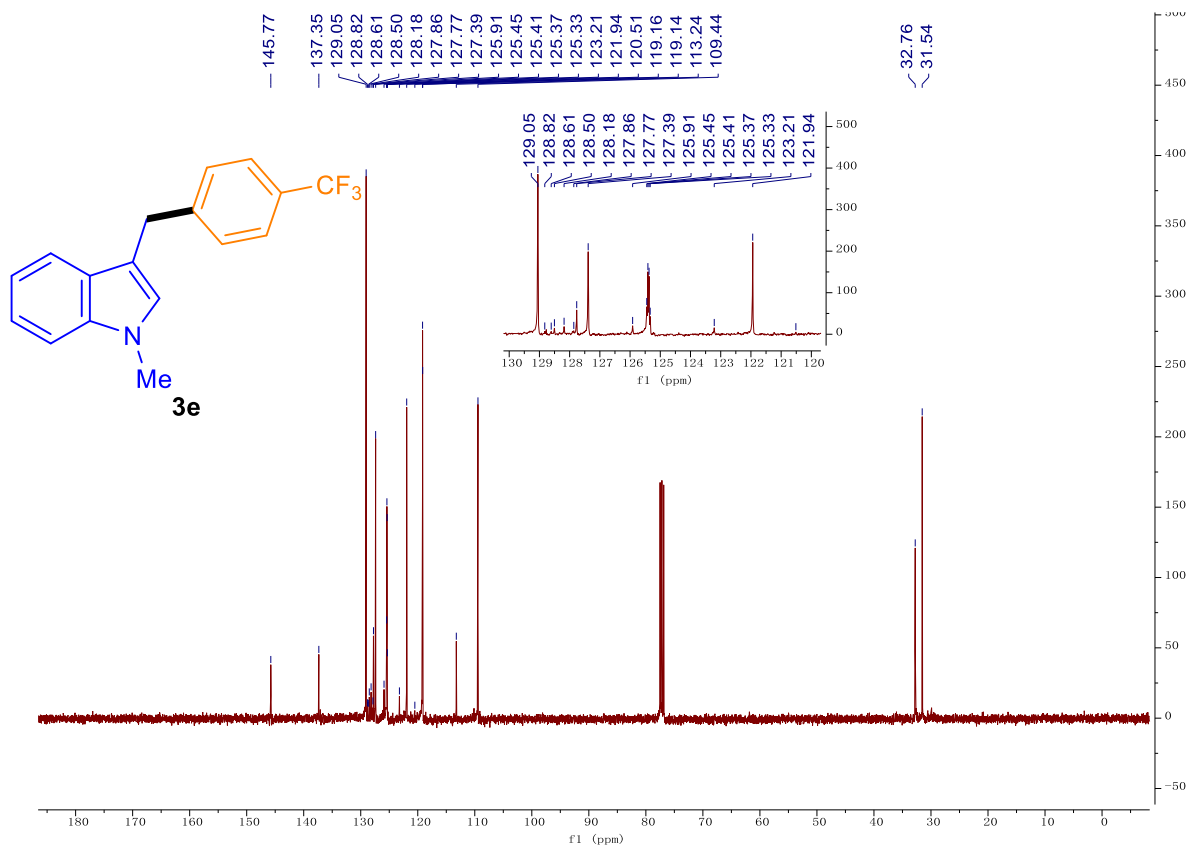



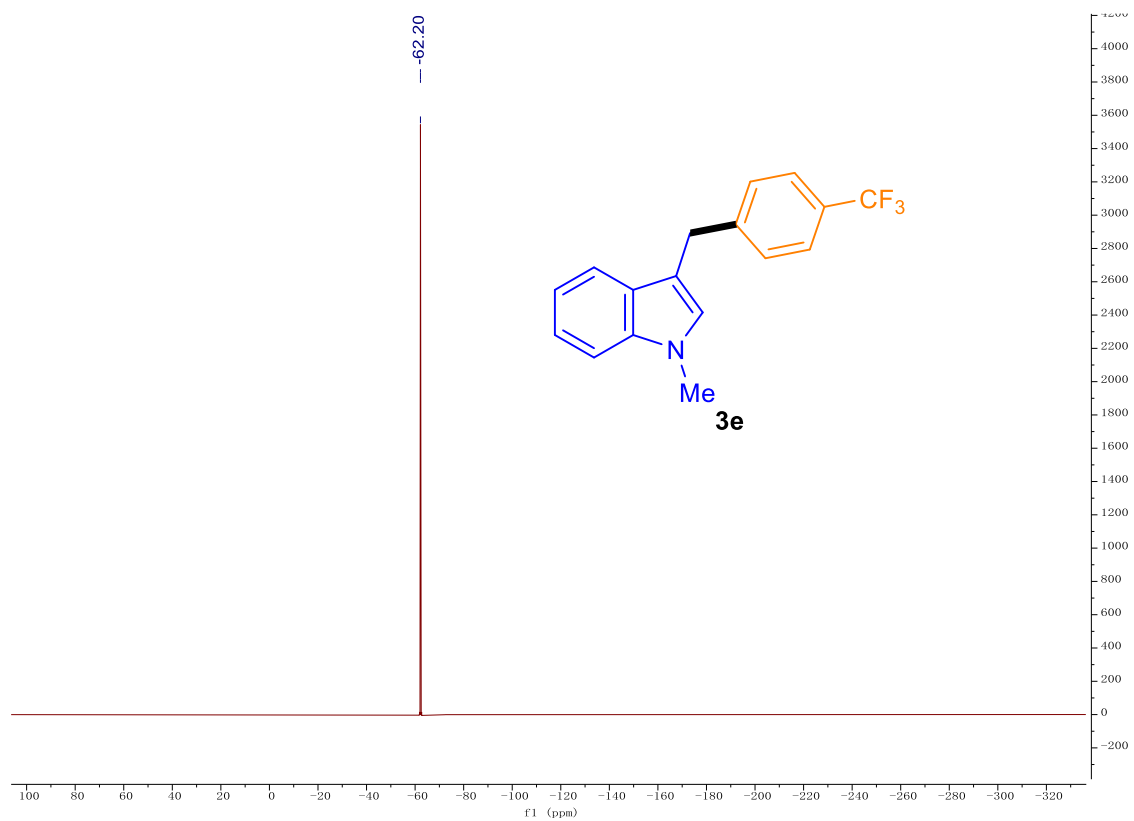

<sup>1</sup>H NMR (400 MHz), <sup>13</sup>C{<sup>1</sup>H} NMR (100 MHz) and <sup>19</sup>F NMR (376 MHz) spectra of **3e** (CDCl<sub>3</sub>, rt).

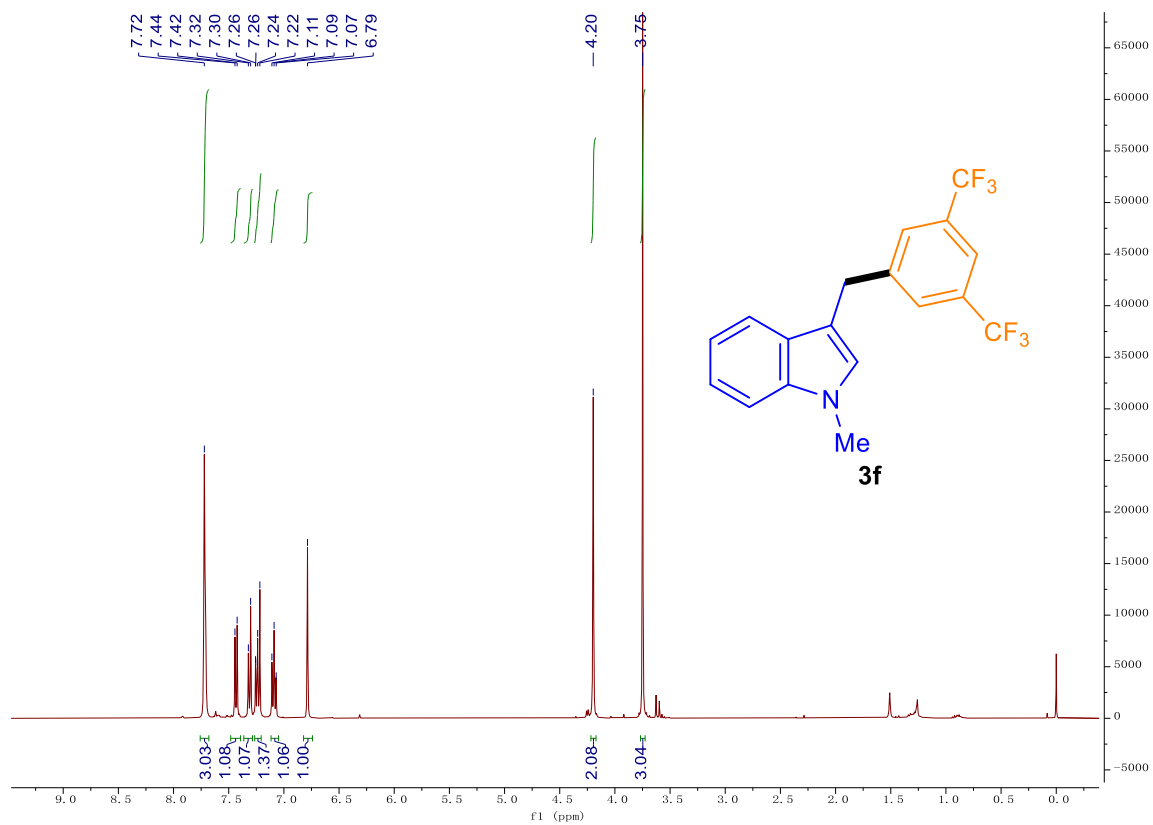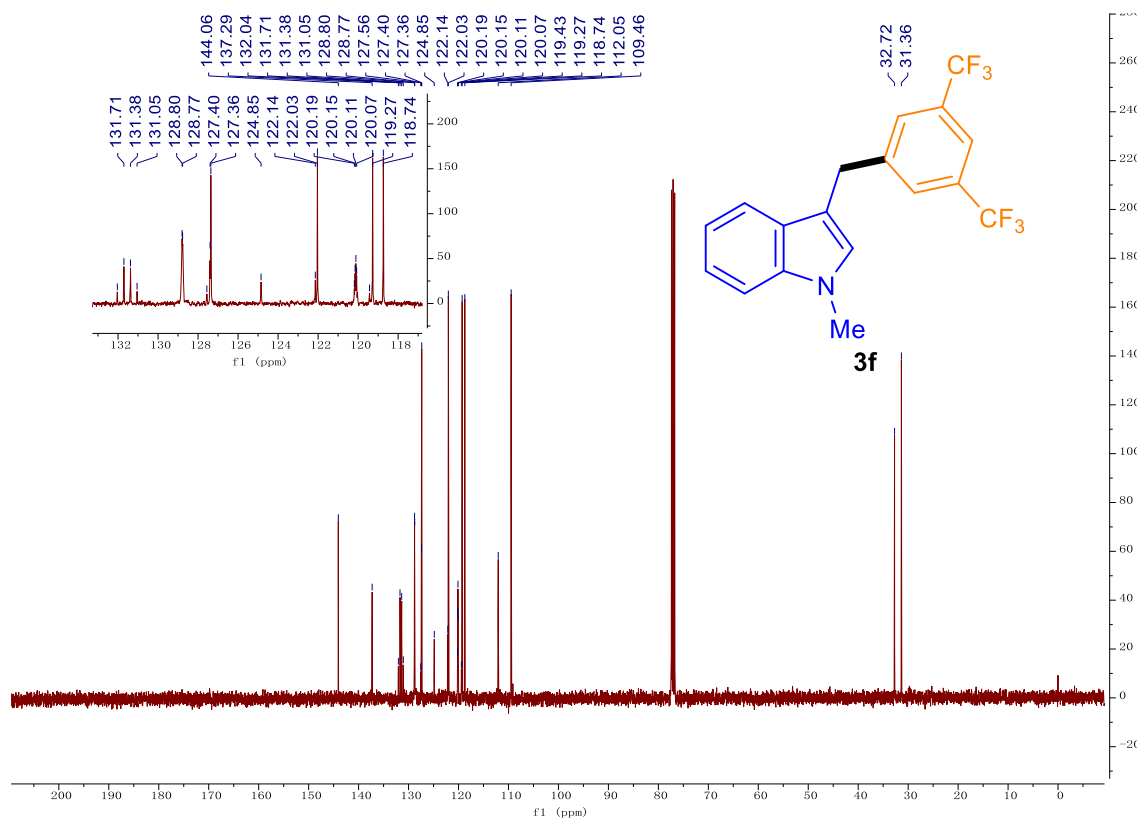

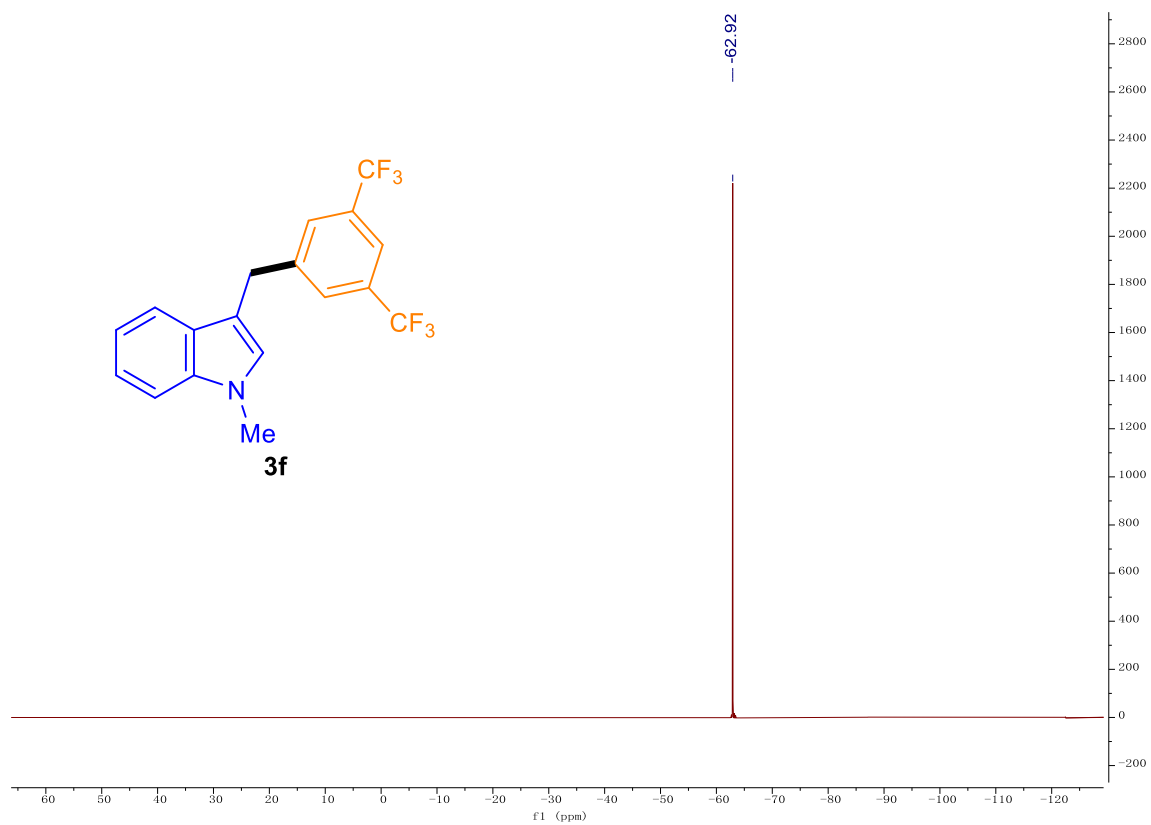

$^1\text{H}$  NMR (400 MHz),  $^{13}\text{C}\{^1\text{H}\}$  NMR (100 MHz) and  $^{19}\text{F}$  NMR (376 MHz) spectra of **3f** (CDCl<sub>3</sub>, rt).

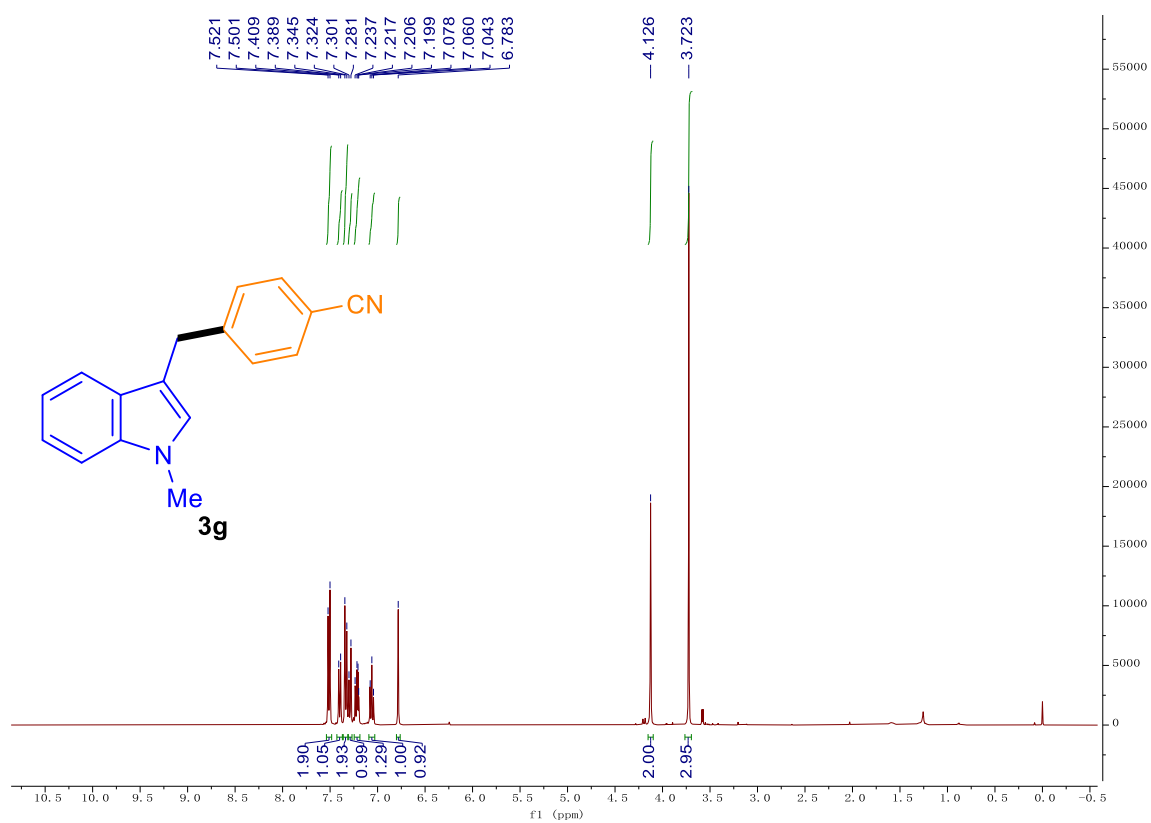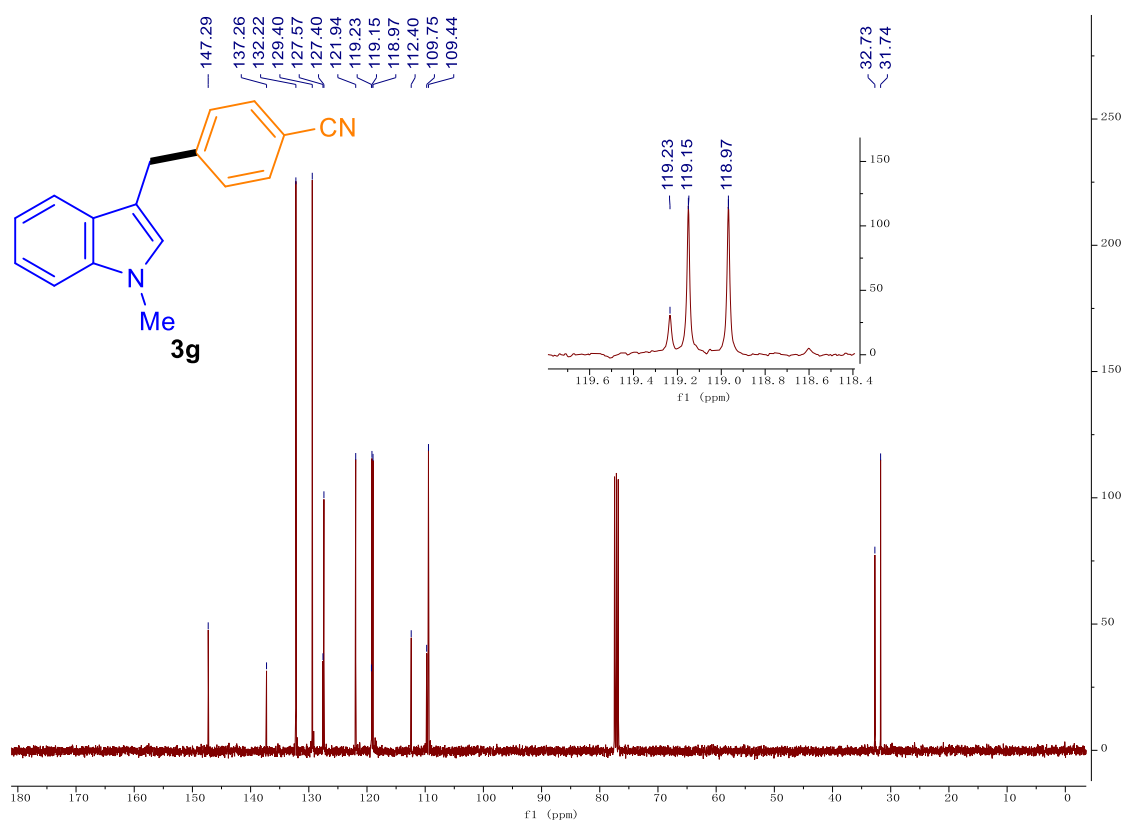

<sup>1</sup>H NMR (400 MHz) and <sup>13</sup>C{<sup>1</sup>H} NMR (100 MHz) spectra of **3g** (CDCl<sub>3</sub>, rt).

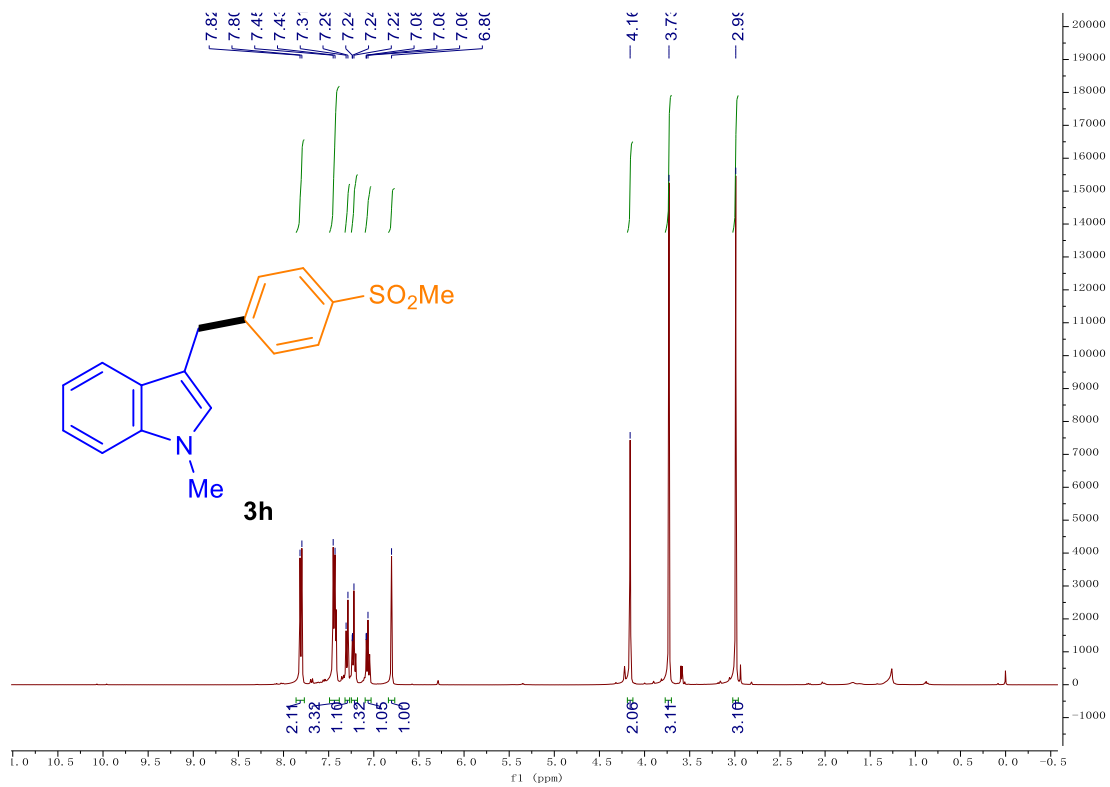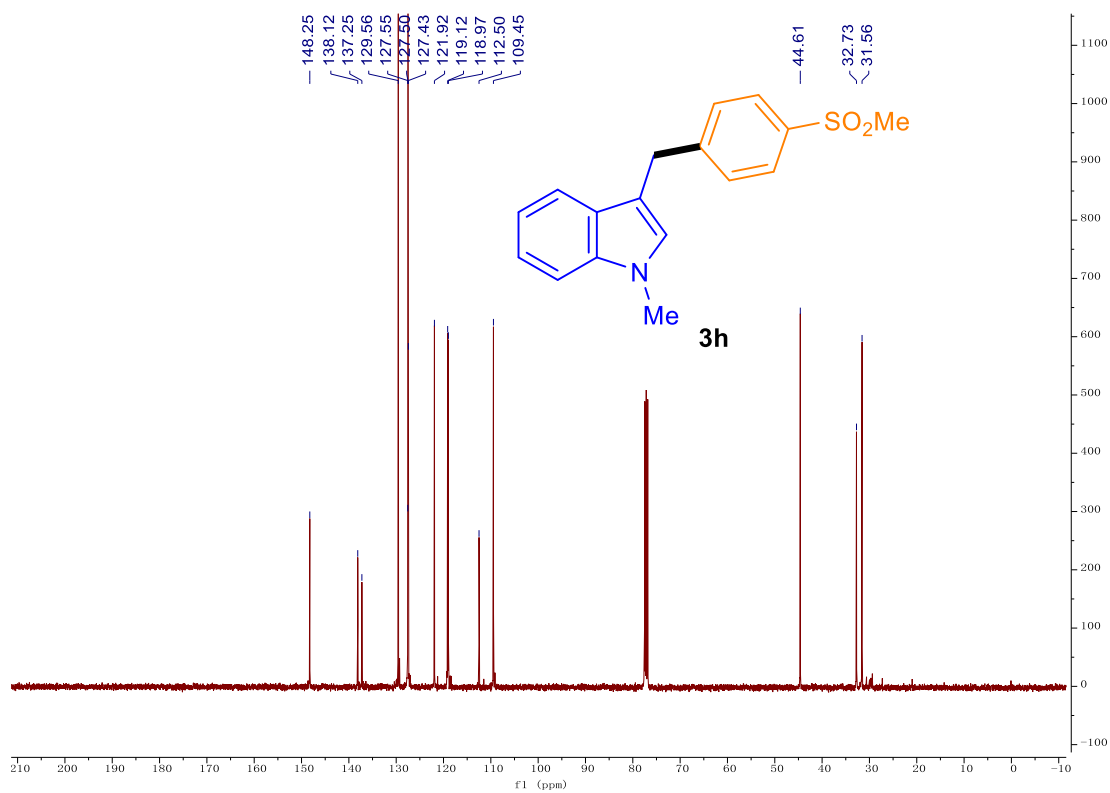

<sup>1</sup>H NMR (400 MHz) and <sup>13</sup>C{<sup>1</sup>H} NMR (100 MHz) spectra of **3h** (CDCl<sub>3</sub>, rt).

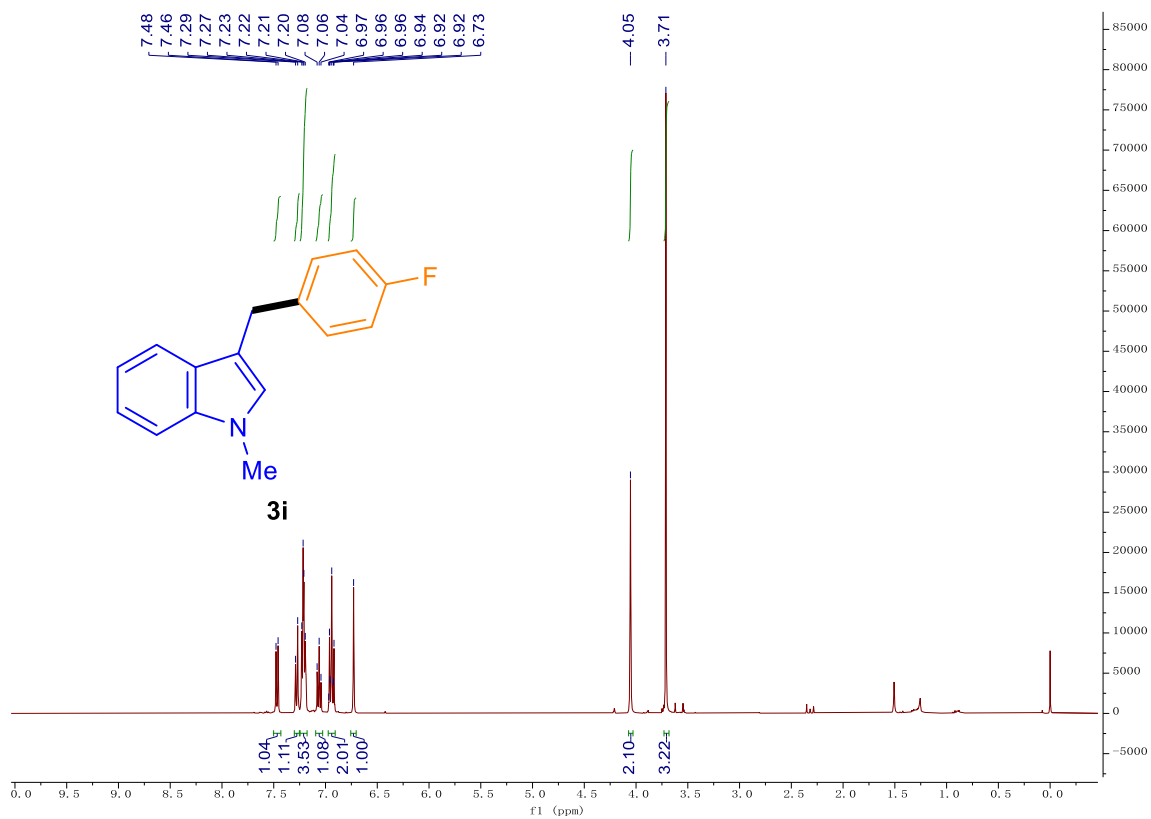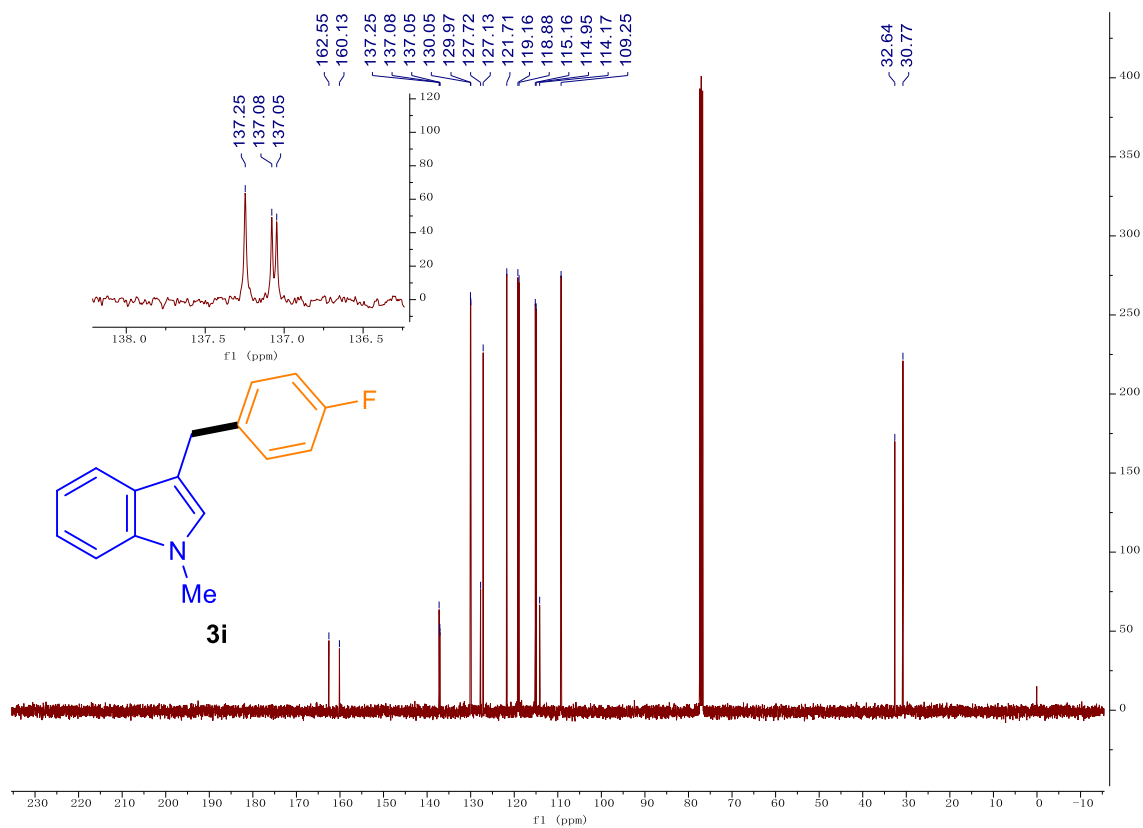

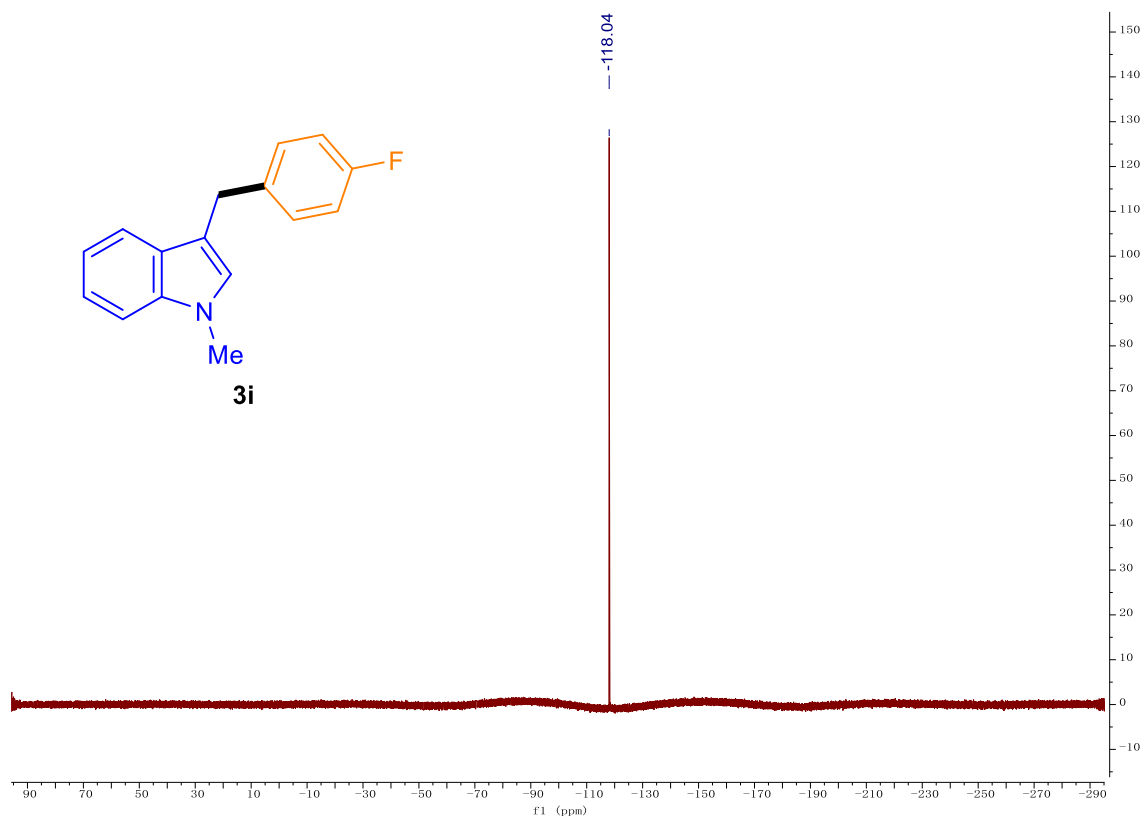

$^1\text{H}$  NMR (400 MHz),  $^{13}\text{C}\{^1\text{H}\}$  NMR (100 MHz) and  $^{19}\text{F}$  NMR (376 MHz) spectra of **3i** (CDCl<sub>3</sub>, rt).

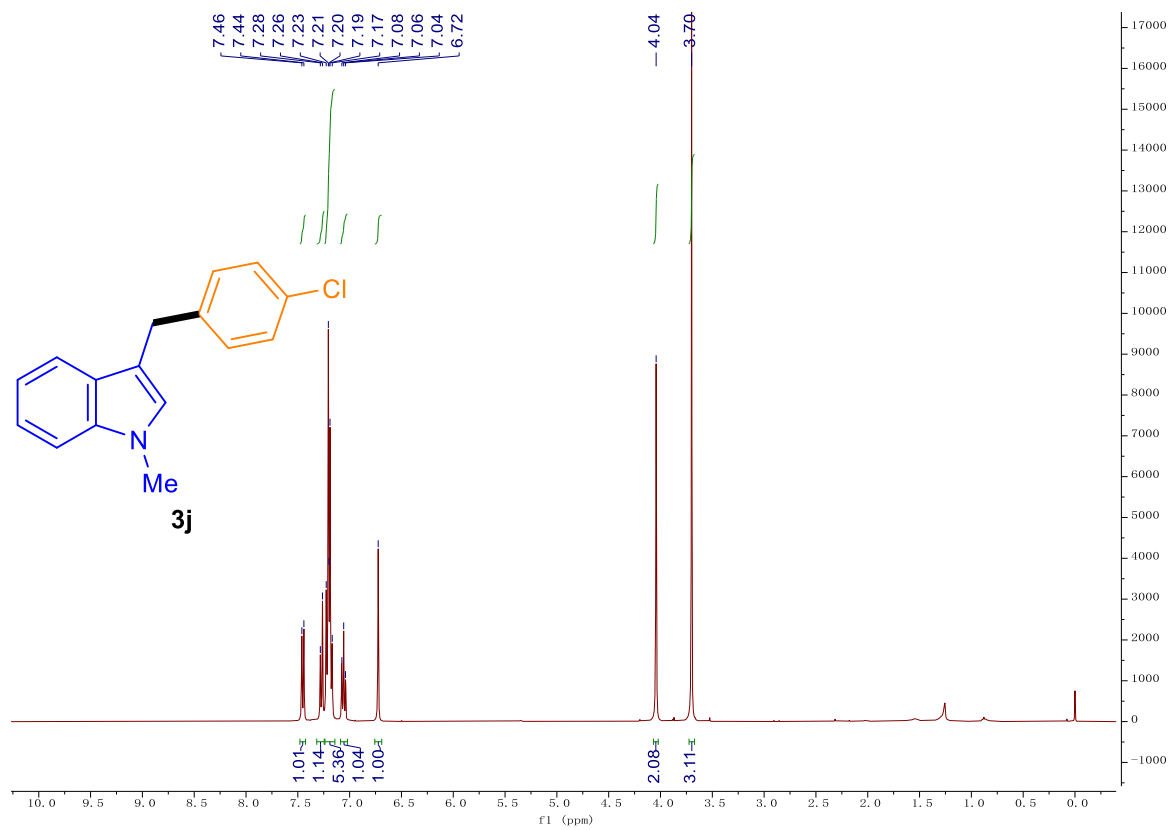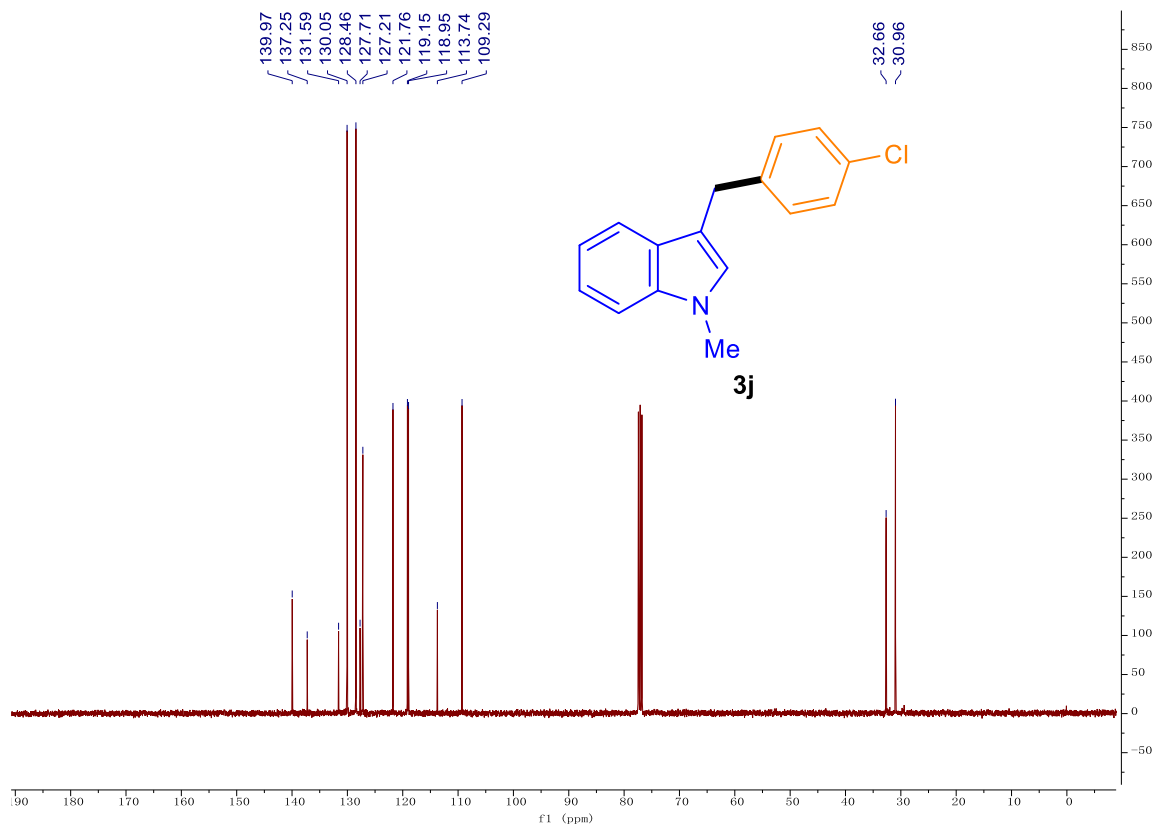

<sup>1</sup>H NMR (400 MHz) and <sup>13</sup>C{<sup>1</sup>H} NMR (100 MHz) spectra of **3j** (CDCl<sub>3</sub>, rt).



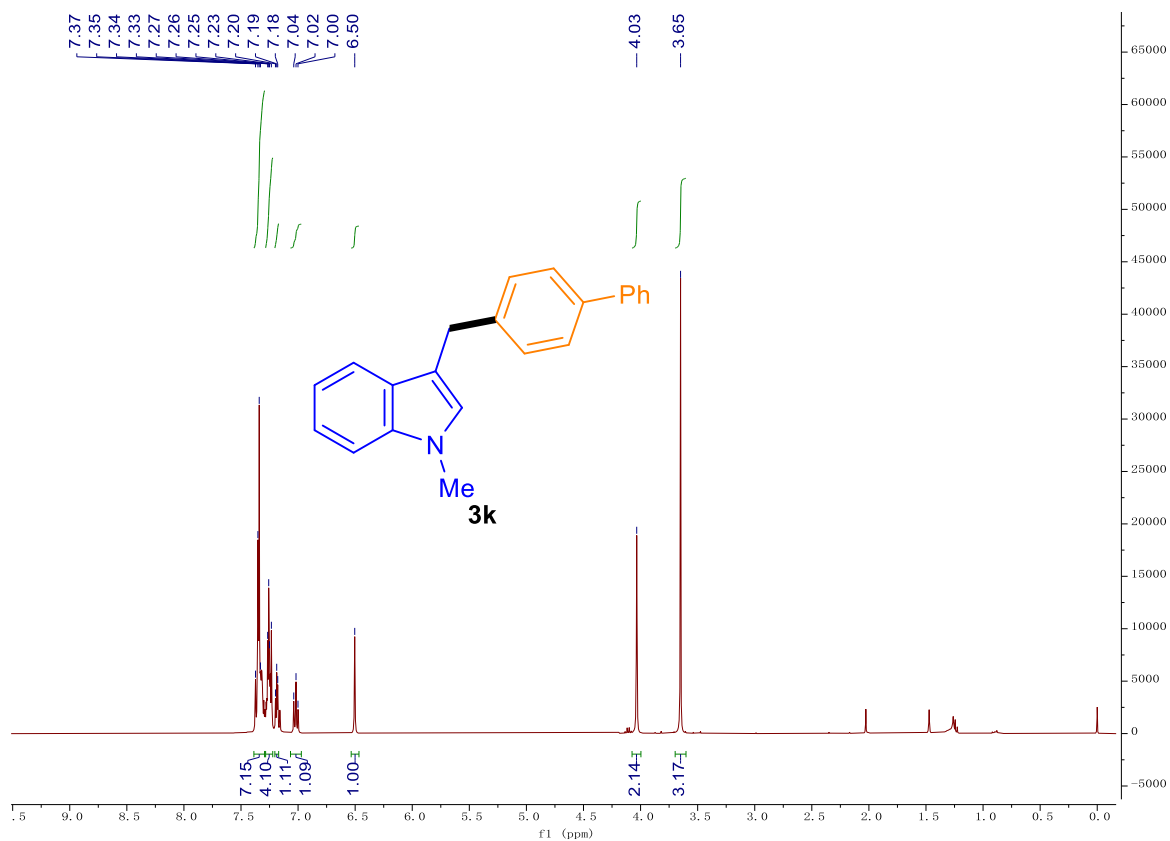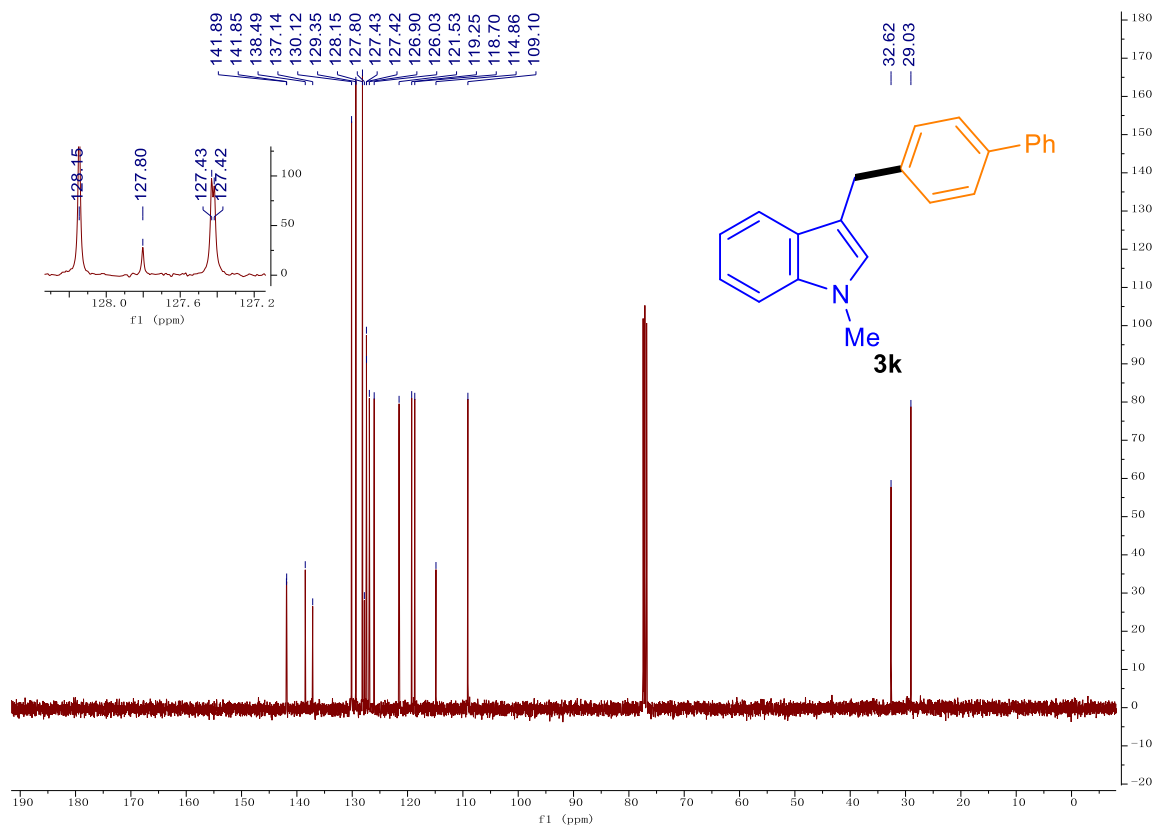

<sup>1</sup>H NMR (400 MHz) and <sup>13</sup>C{<sup>1</sup>H} NMR (100 MHz) spectra of **3k** (CDCl<sub>3</sub>, rt).

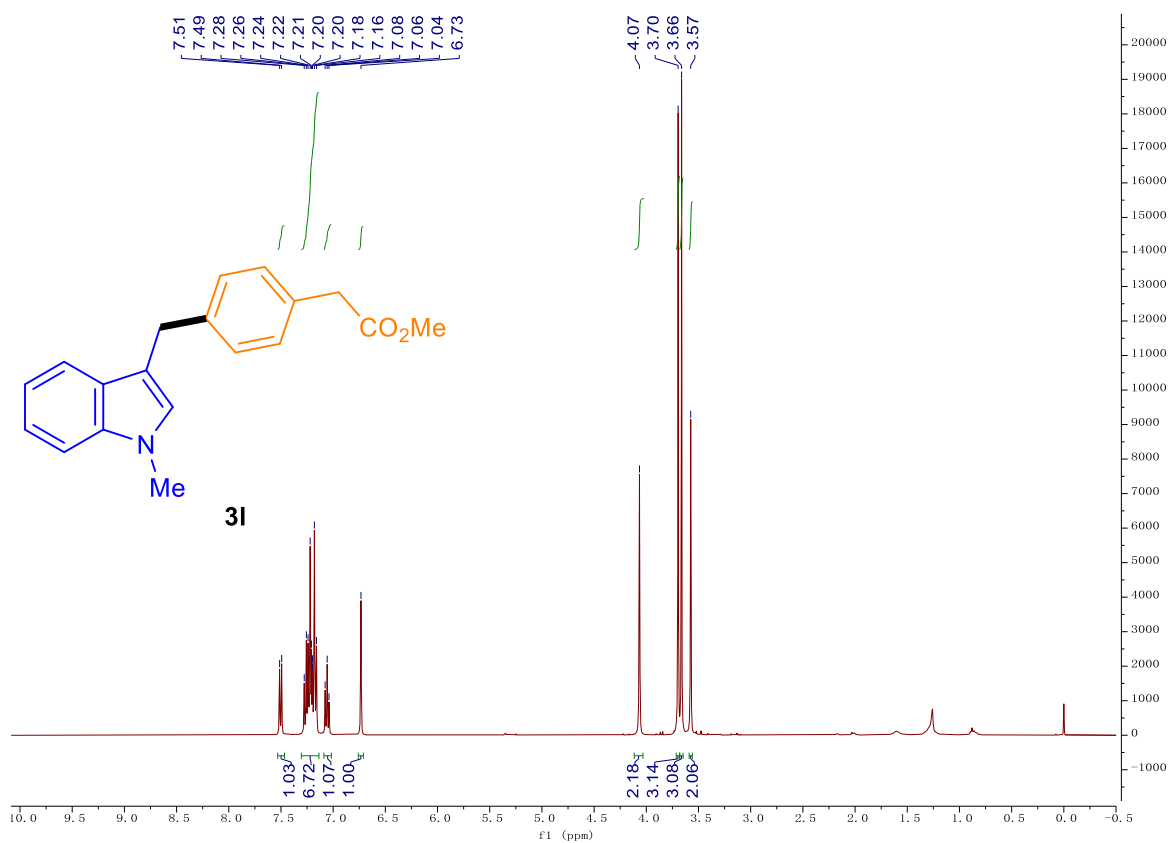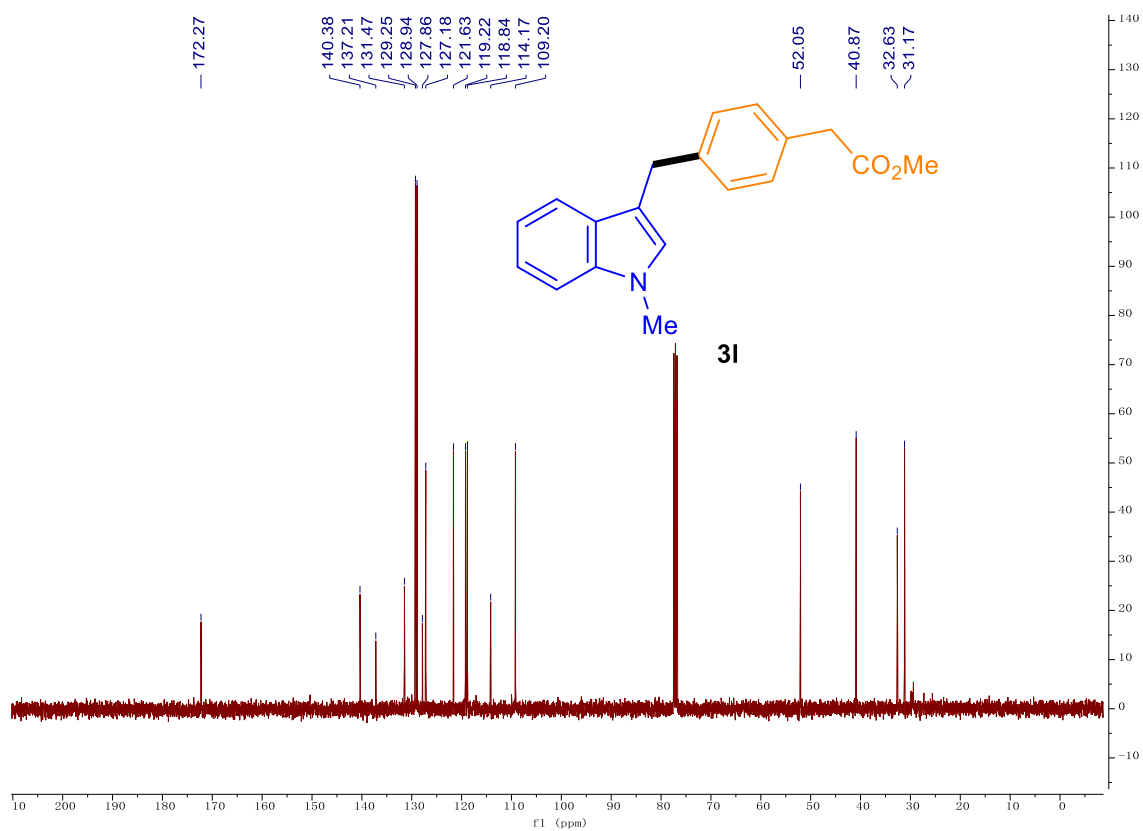

**<sup>1</sup>H NMR (400 MHz) and <sup>13</sup>C{<sup>1</sup>H} NMR (100 MHz) spectra of 31 (CDCl<sub>3</sub>, rt).**

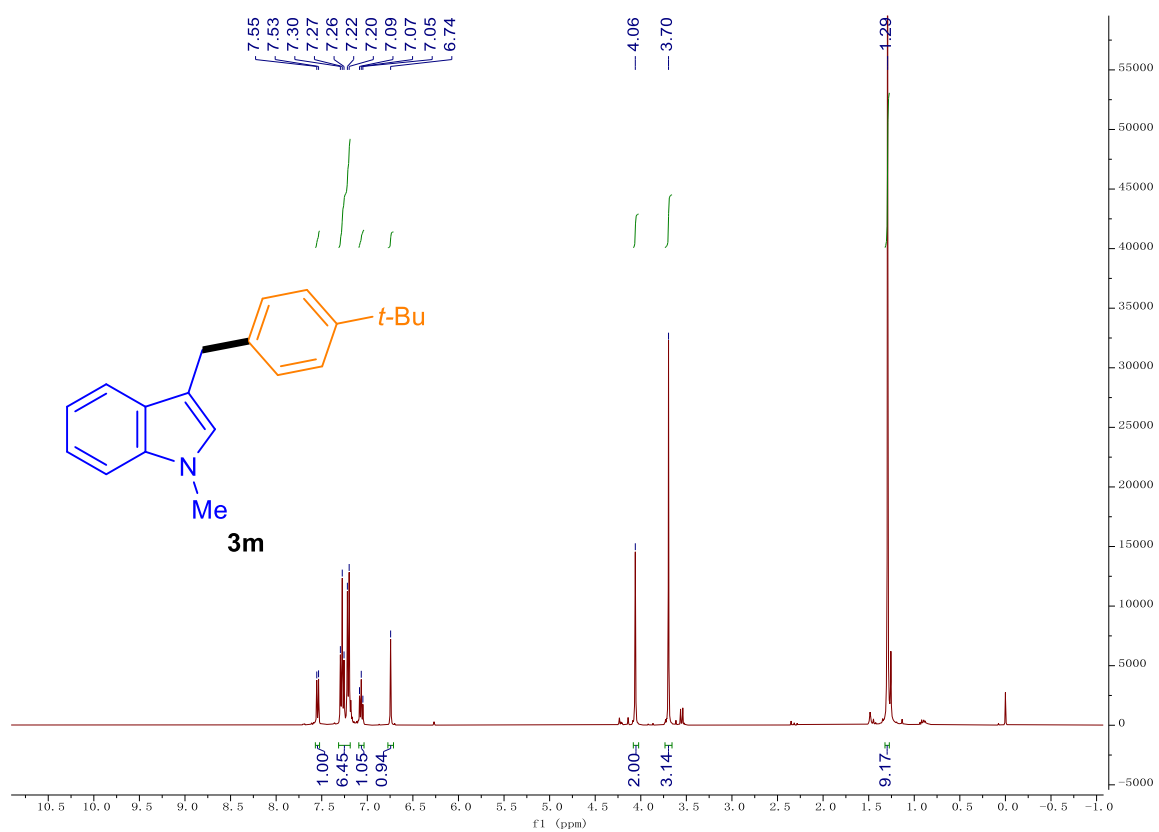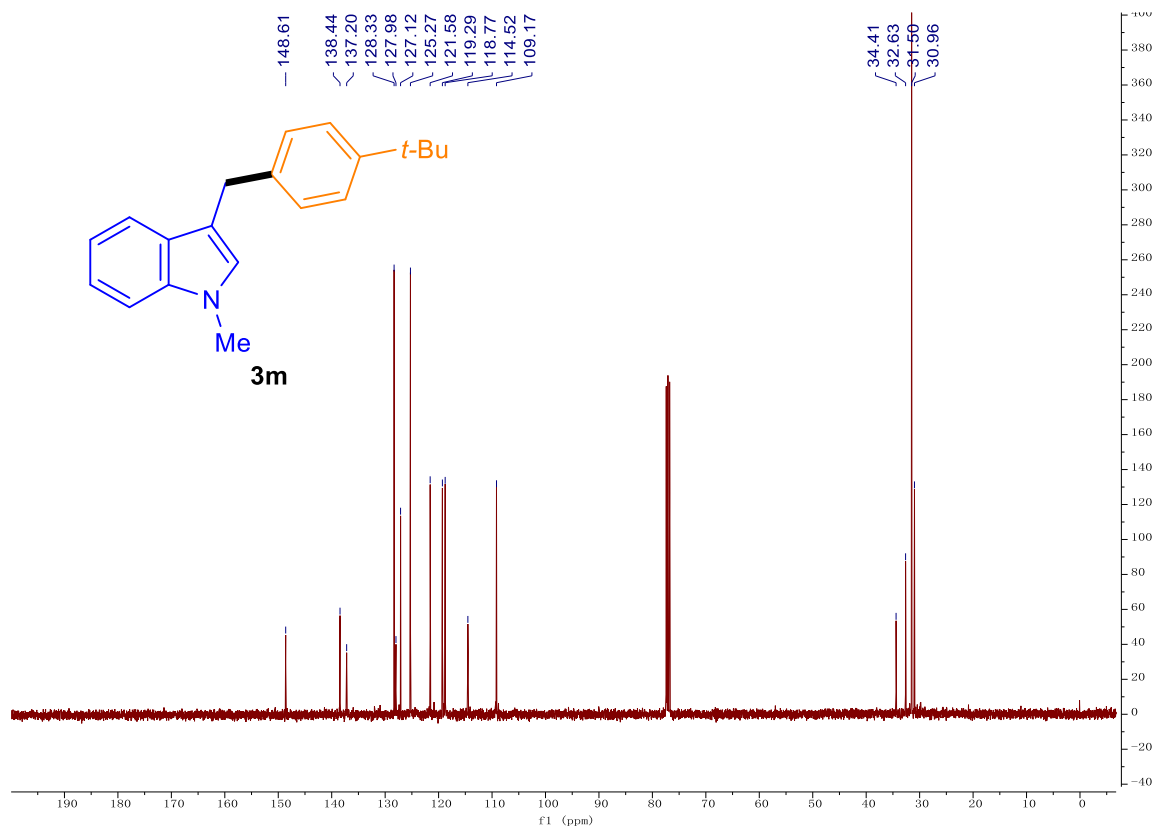

<sup>1</sup>H NMR (400 MHz) and <sup>13</sup>C{<sup>1</sup>H} NMR (100 MHz) spectra of **3m** (CDCl<sub>3</sub>, rt).

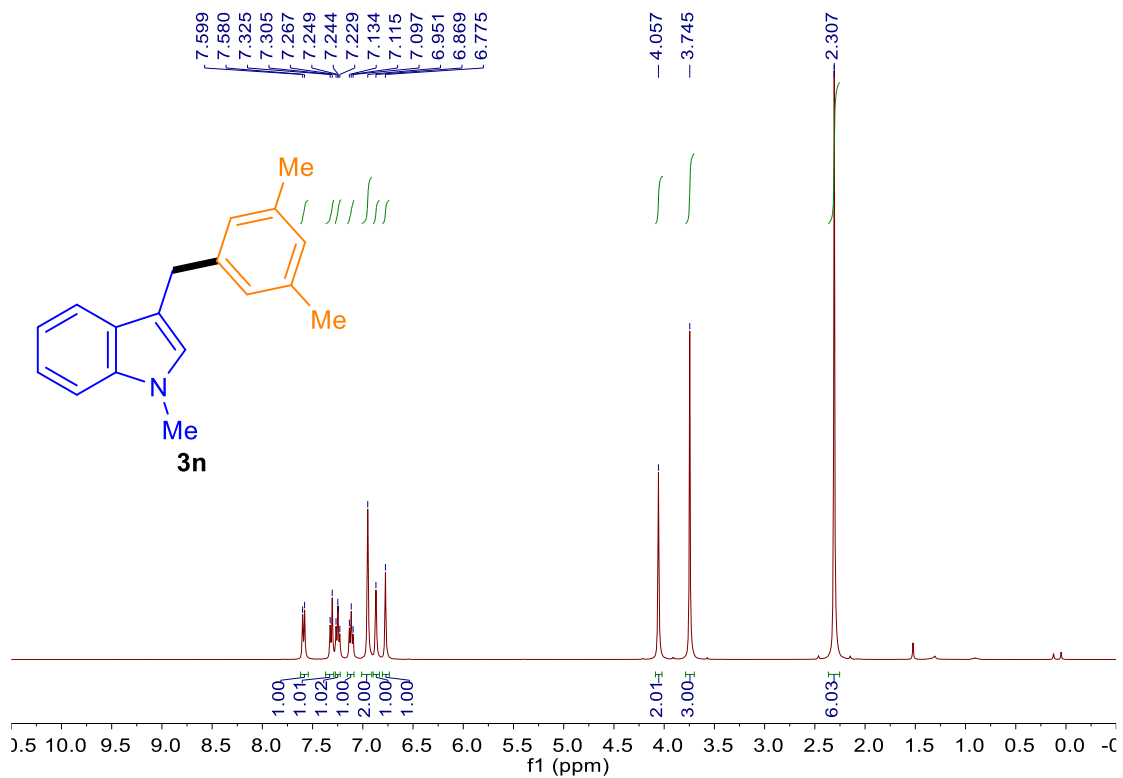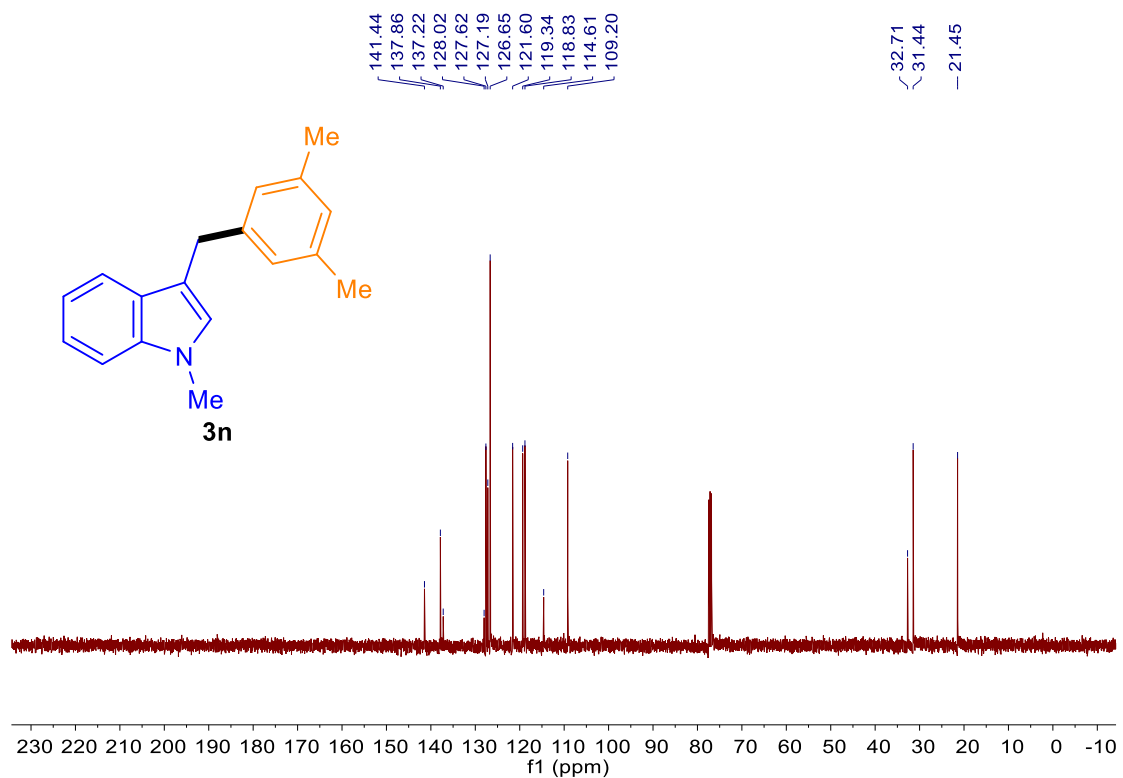

<sup>1</sup>H NMR (400 MHz) and <sup>13</sup>C{<sup>1</sup>H} NMR (100 MHz) spectra of **3n** (CDCl<sub>3</sub>, rt).

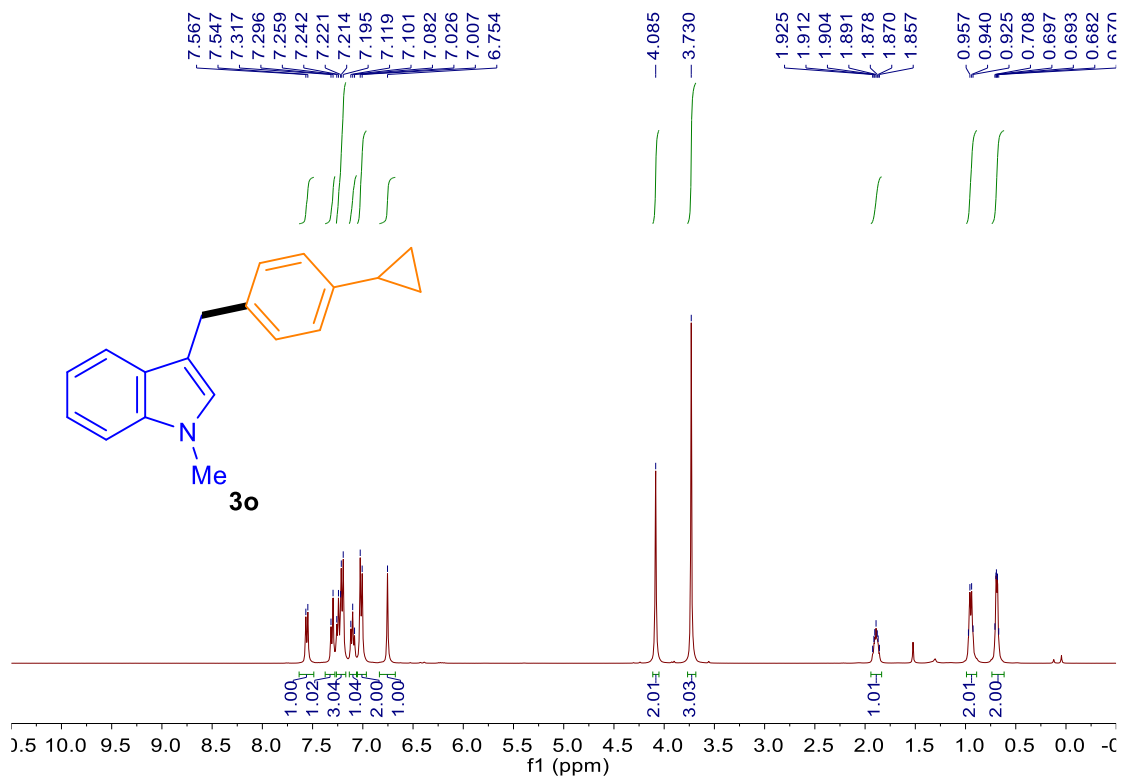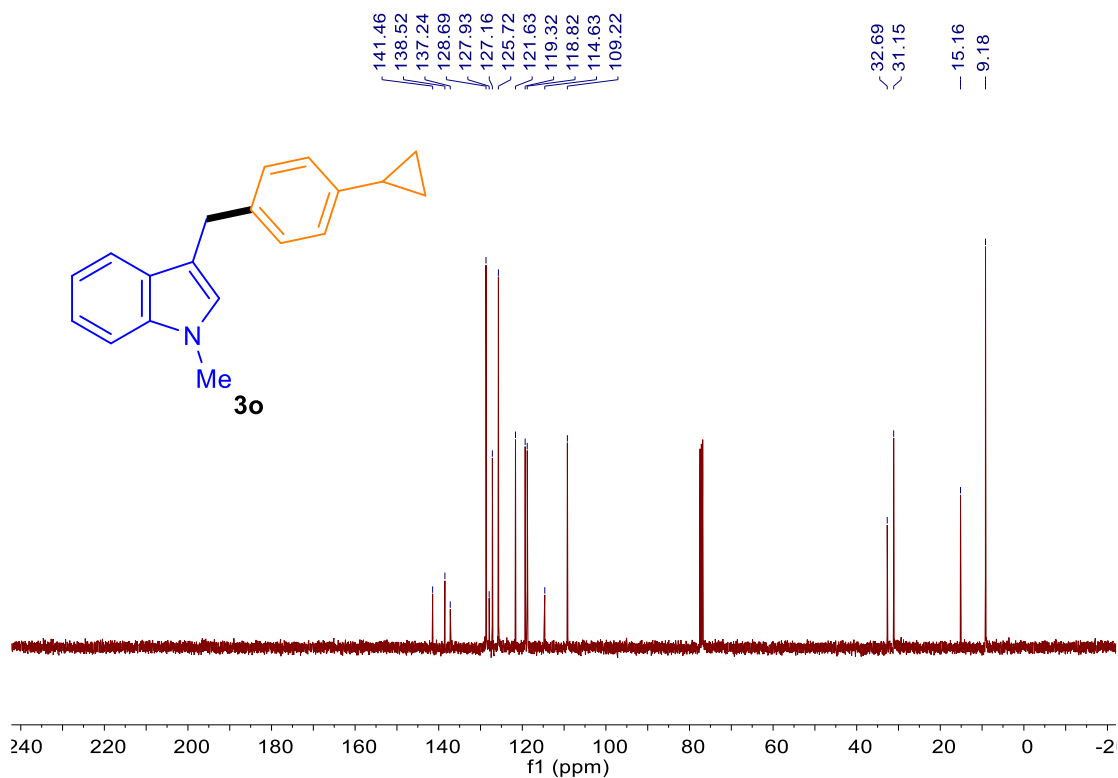

<sup>1</sup>H NMR (400 MHz) and <sup>13</sup>C{<sup>1</sup>H} NMR (100 MHz) spectra of **3o** (CDCl<sub>3</sub>, rt).

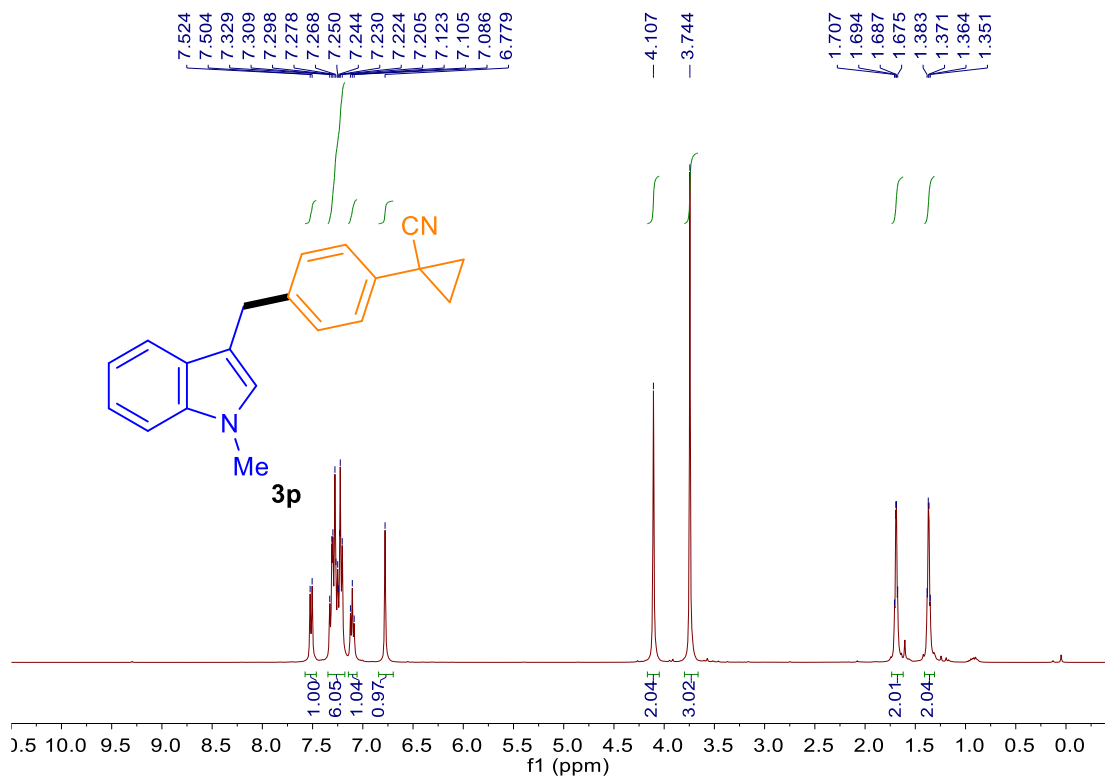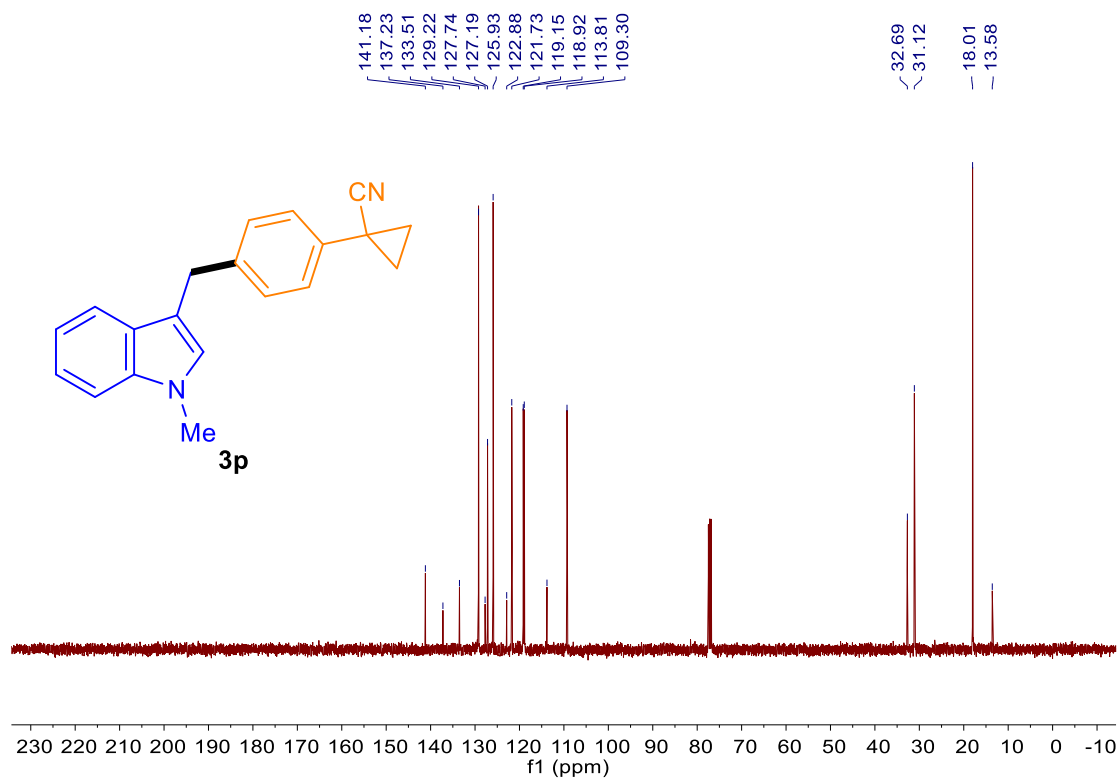

<sup>1</sup>H NMR (400 MHz) and <sup>13</sup>C{<sup>1</sup>H} NMR (100 MHz) spectra of **3p** (CDCl<sub>3</sub>, rt).

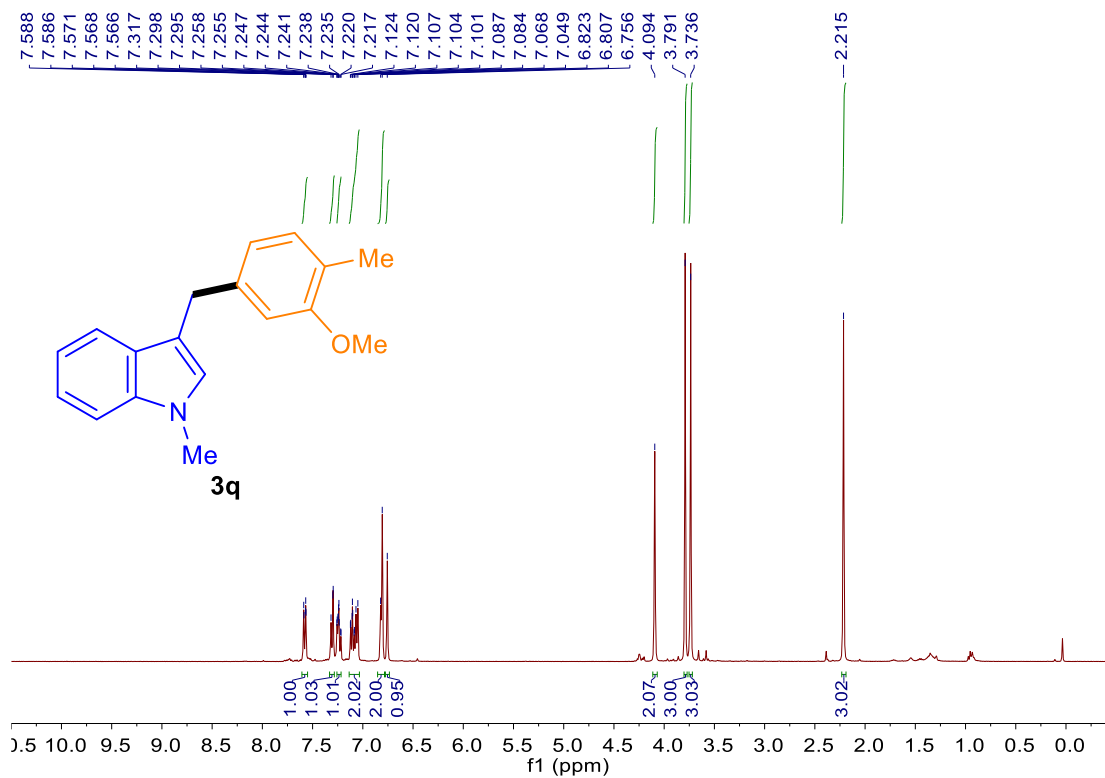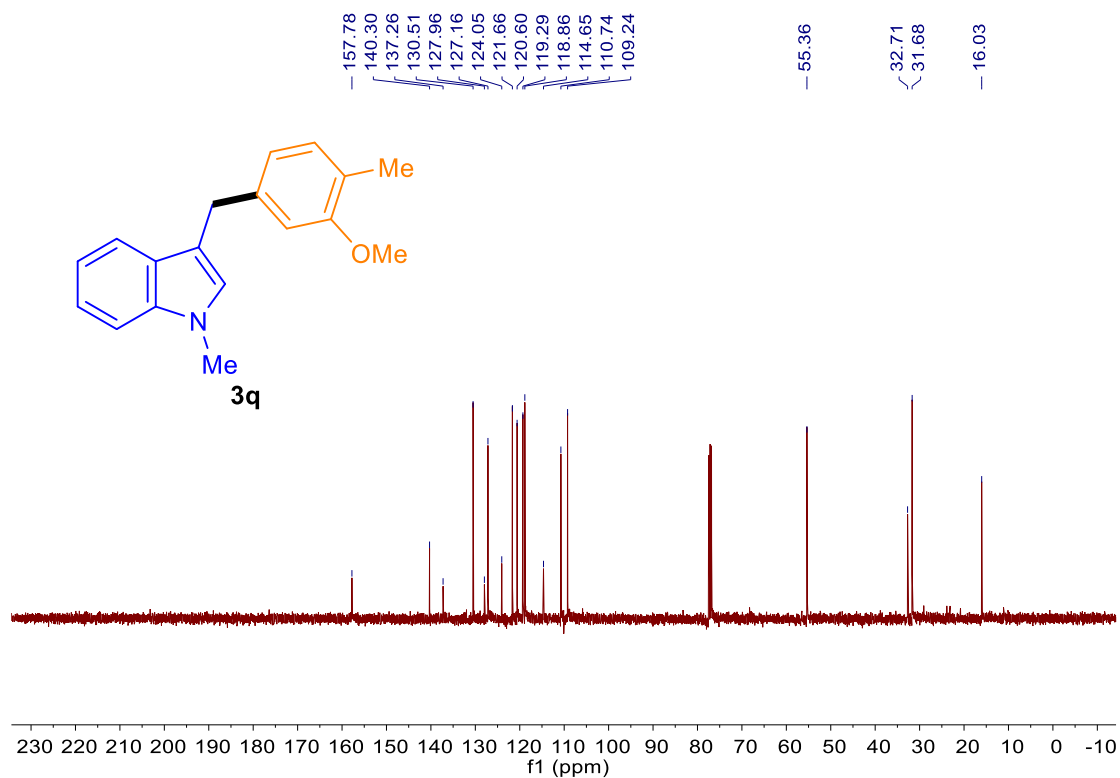

<sup>1</sup>H NMR (400 MHz) and <sup>13</sup>C{<sup>1</sup>H} NMR (100 MHz) spectra of **3q** (CDCl<sub>3</sub>, rt).

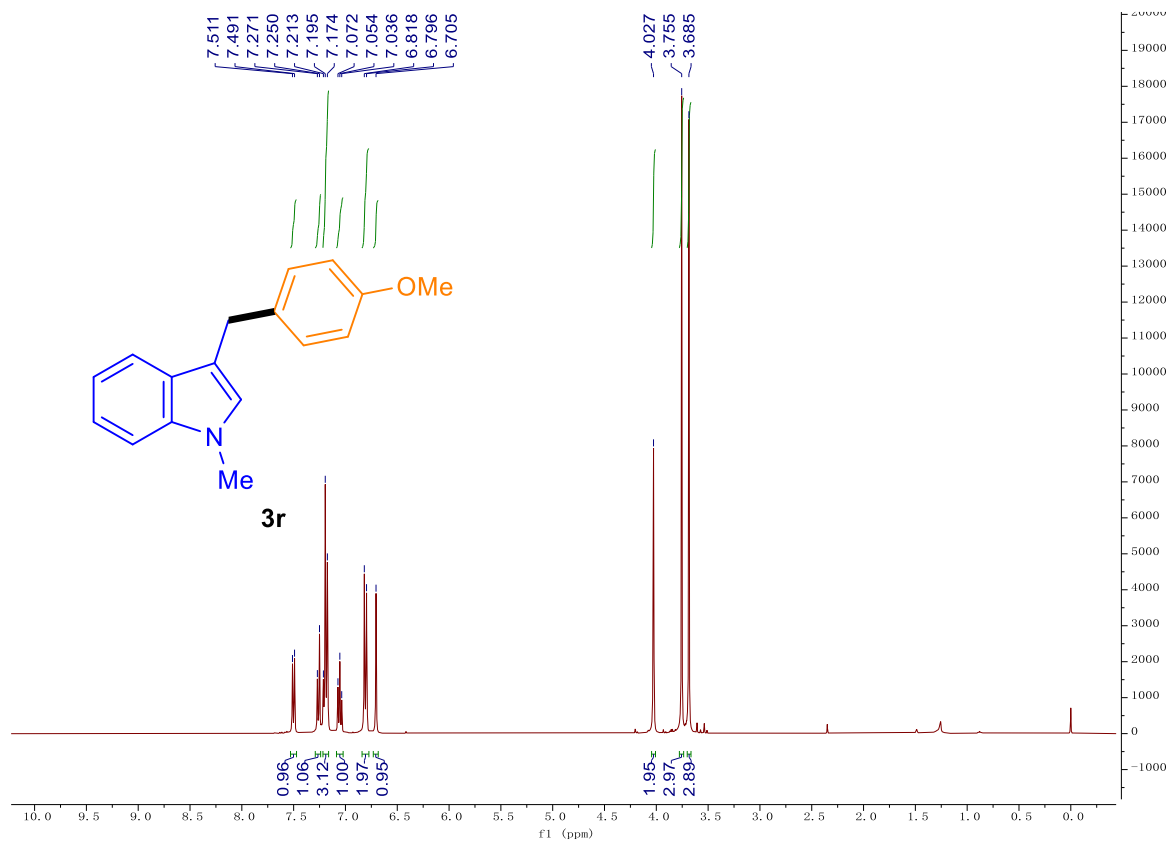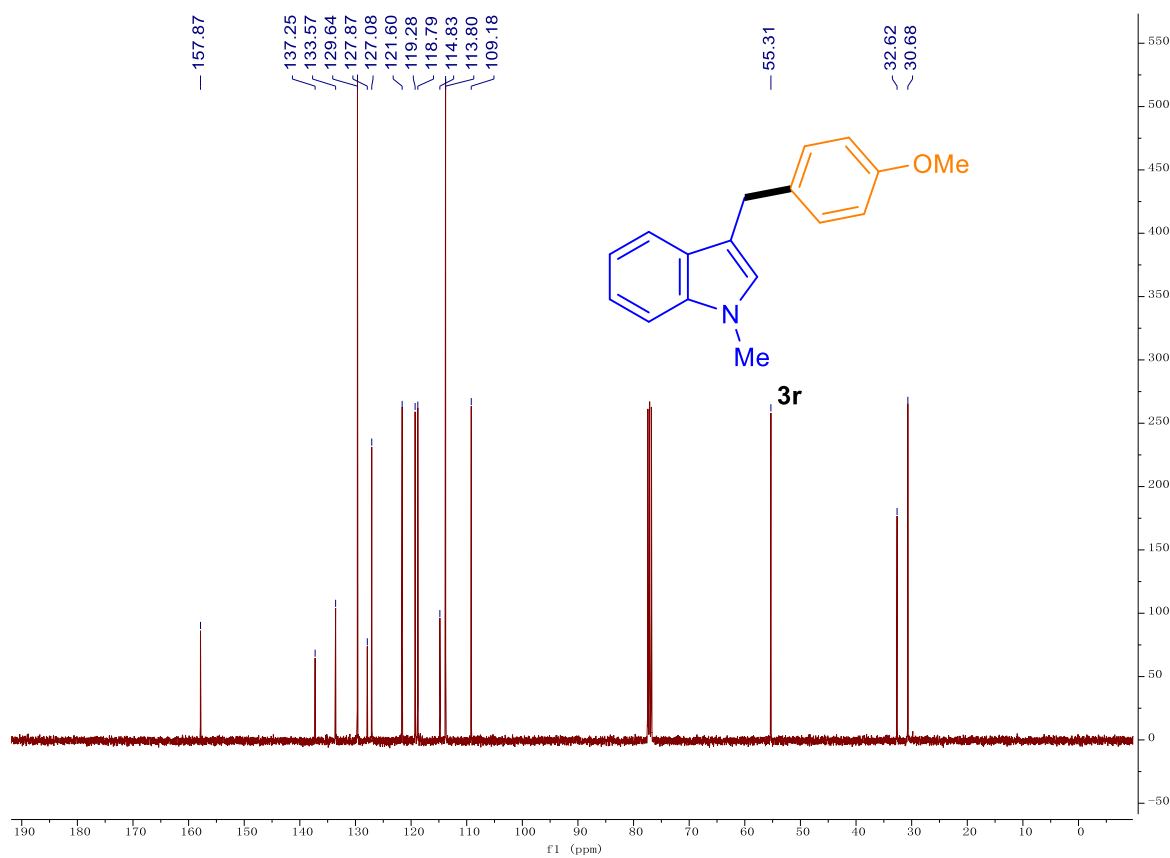

<sup>1</sup>H NMR (400 MHz) and <sup>13</sup>C{<sup>1</sup>H} NMR (100 MHz) spectra of **3r** (CDCl<sub>3</sub>, rt).



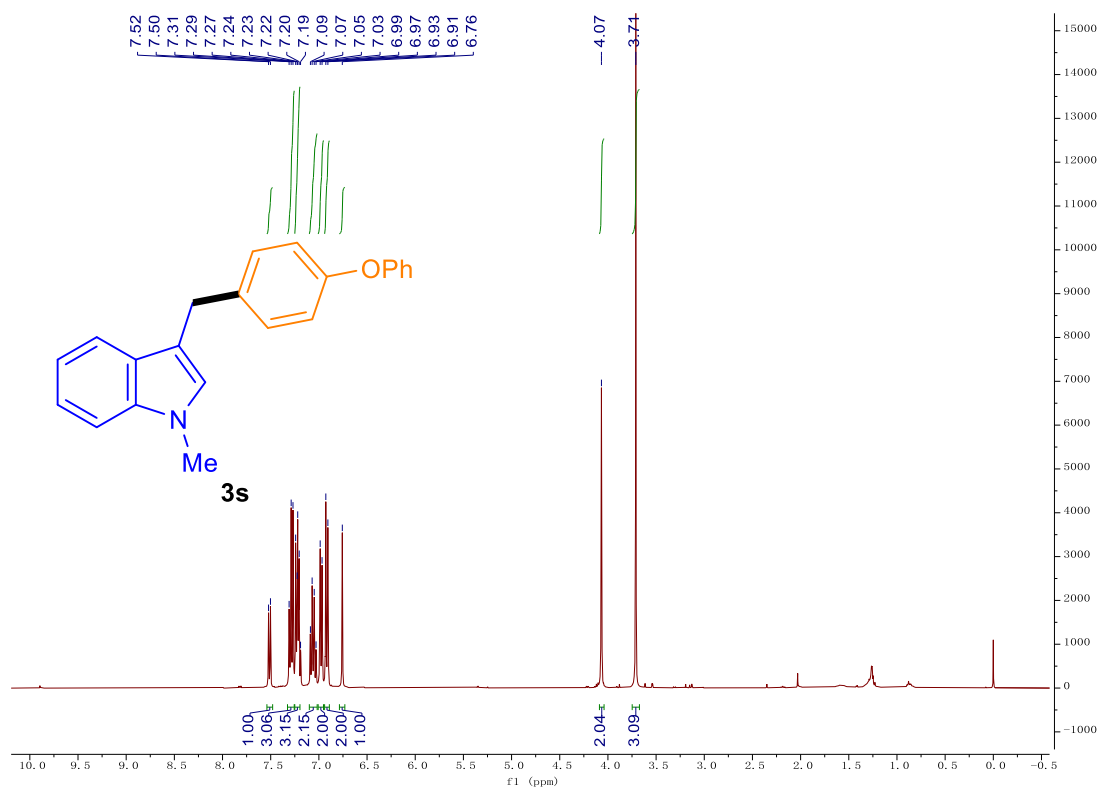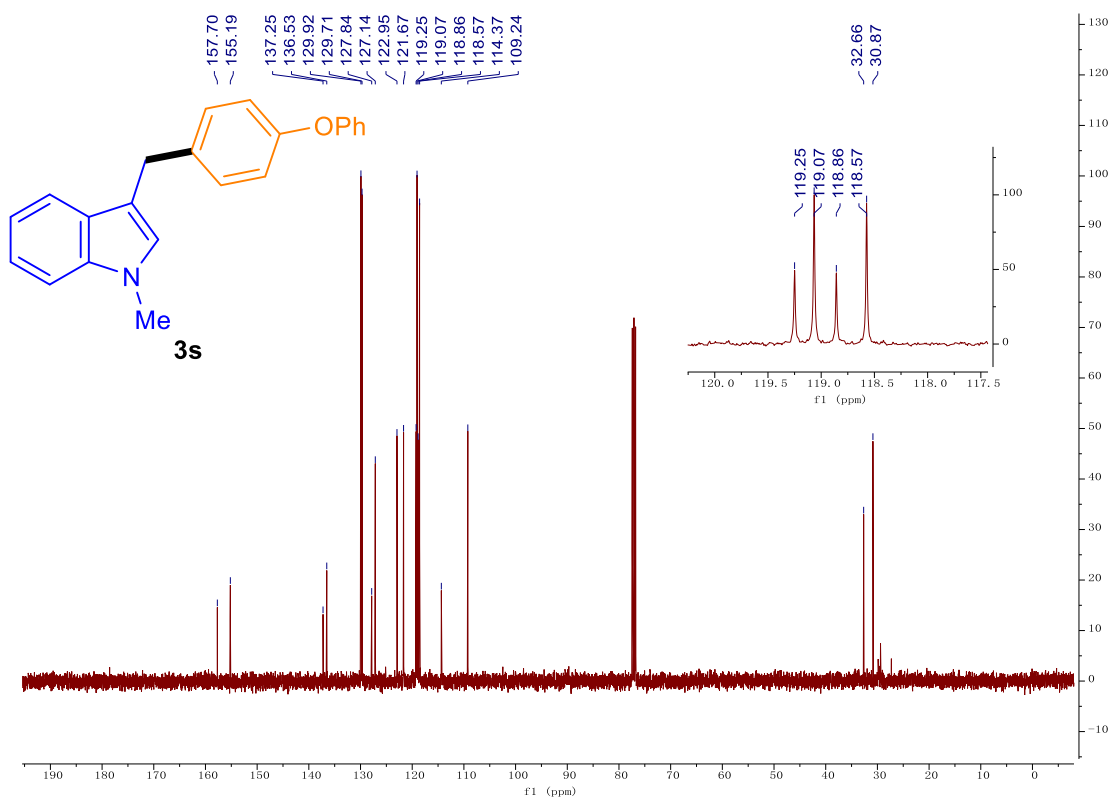

<sup>1</sup>H NMR (400 MHz) and <sup>13</sup>C{<sup>1</sup>H} NMR (100 MHz) spectra of **3s** (CDCl<sub>3</sub>, rt).

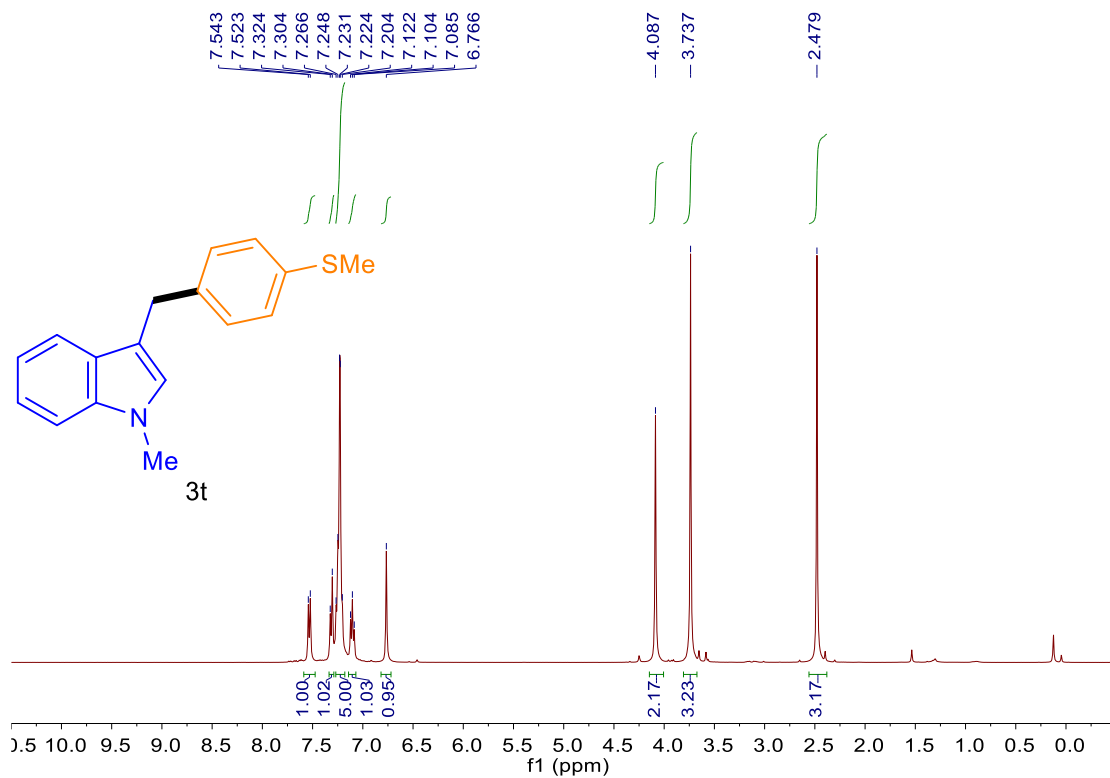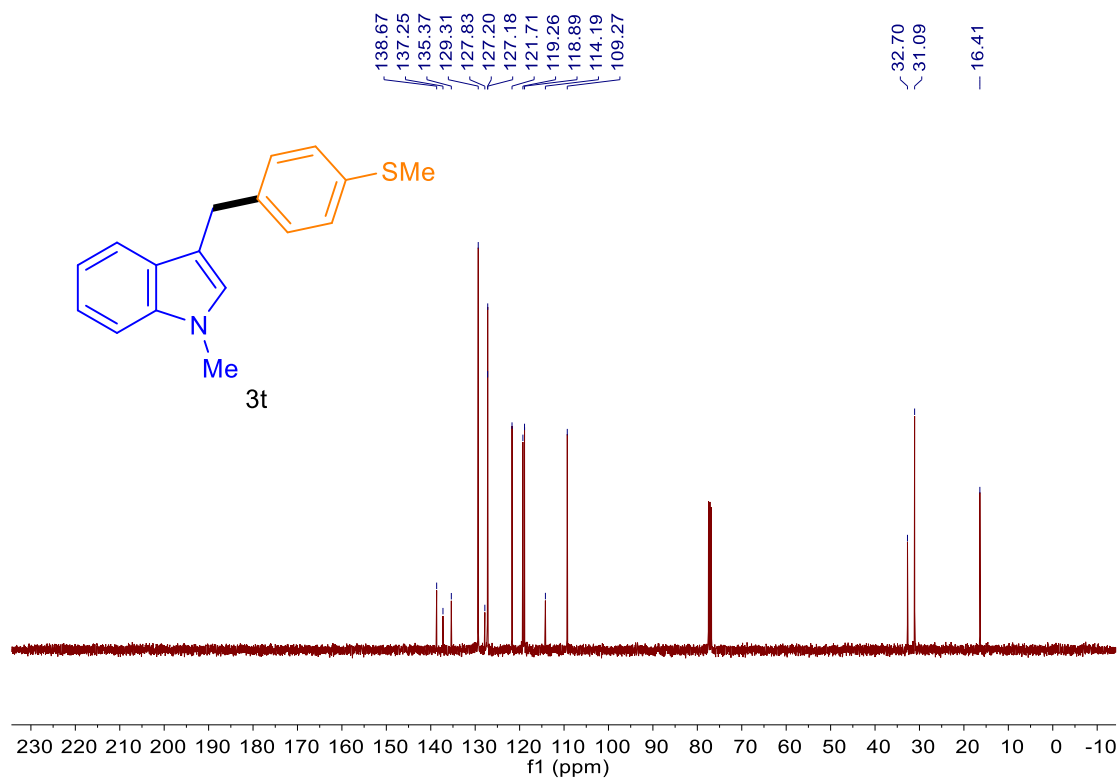

**<sup>1</sup>H NMR (400 MHz) and <sup>13</sup>C{<sup>1</sup>H} NMR (100 MHz) spectra of 3t (CDCl<sub>3</sub>, rt).**

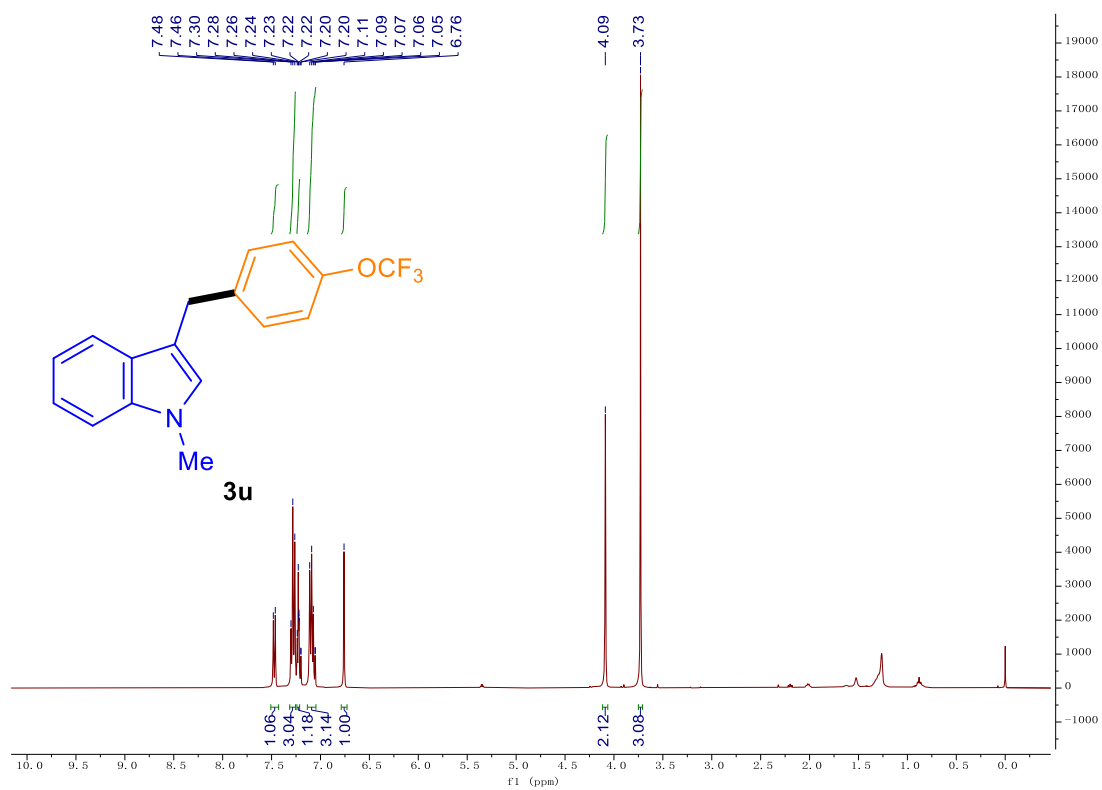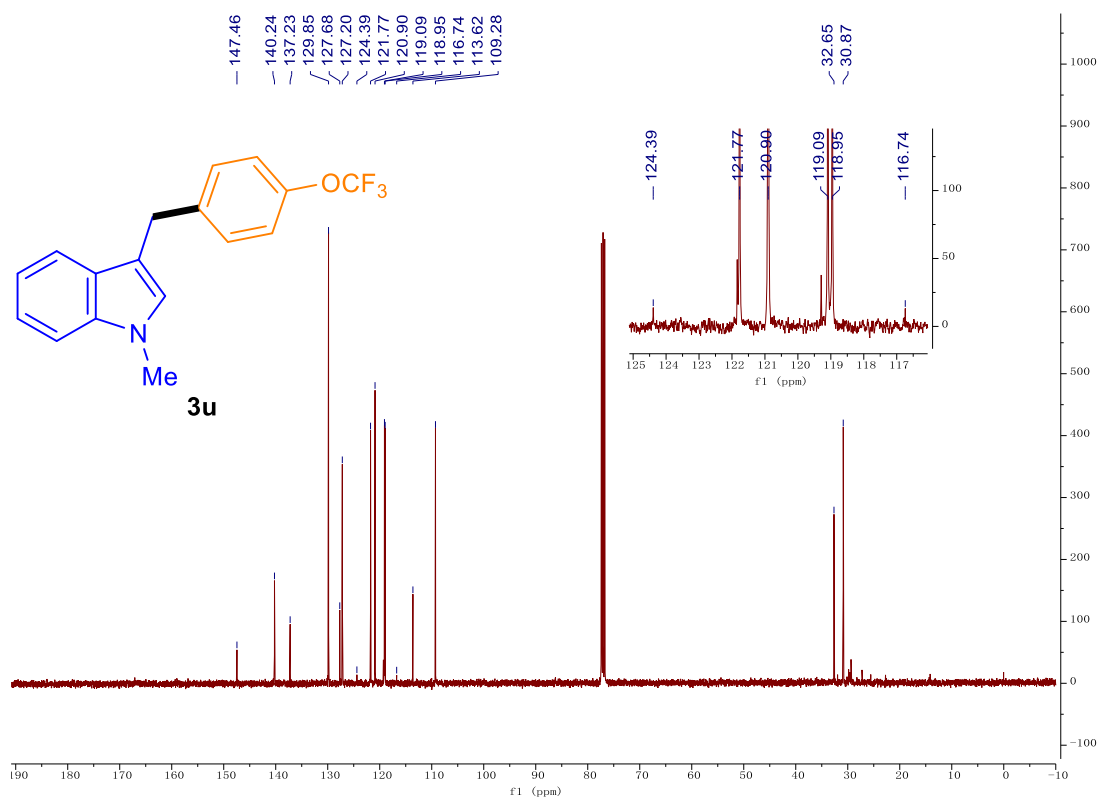

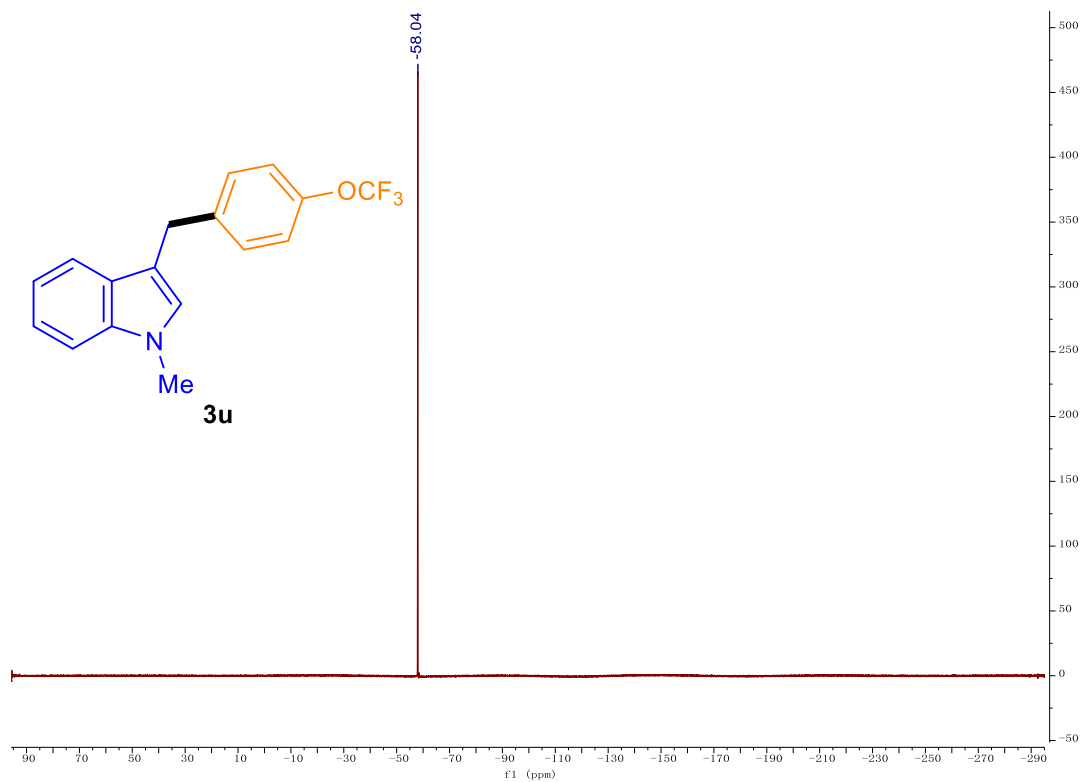

$^1\text{H}$  NMR (400 MHz),  $^{13}\text{C}\{^1\text{H}\}$  NMR (100 MHz) and  $^{19}\text{F}$  NMR (376 MHz) spectra of **3u** (CDCl<sub>3</sub>, rt).

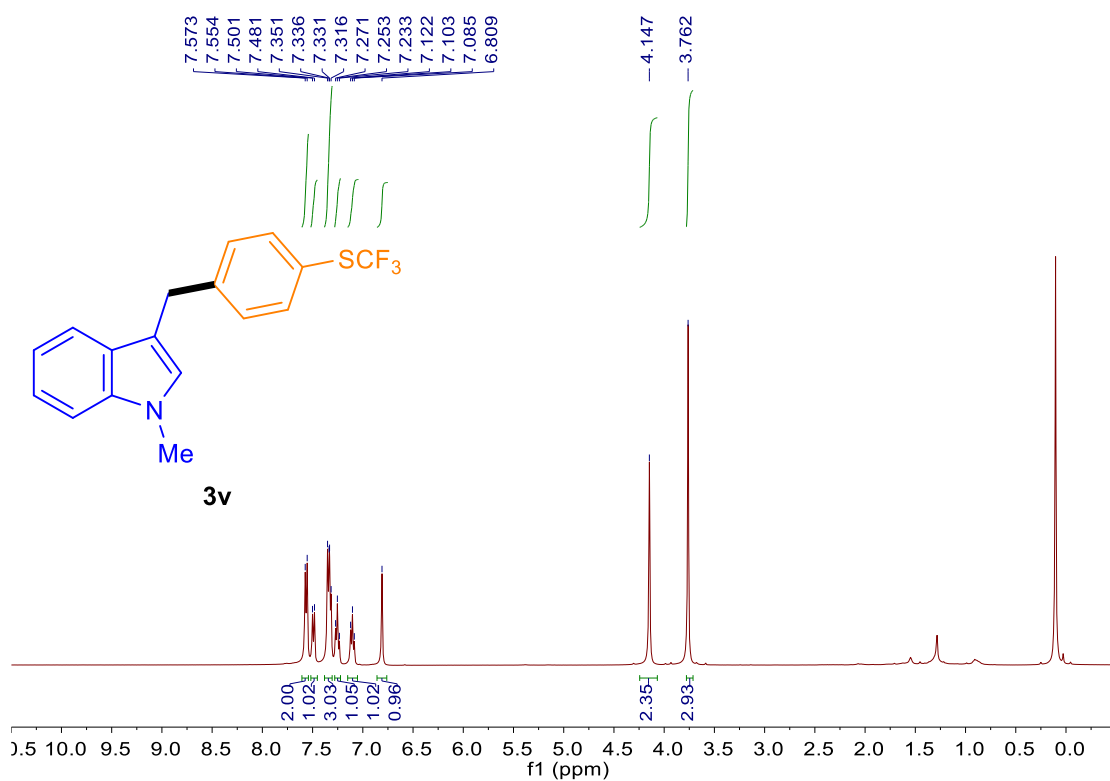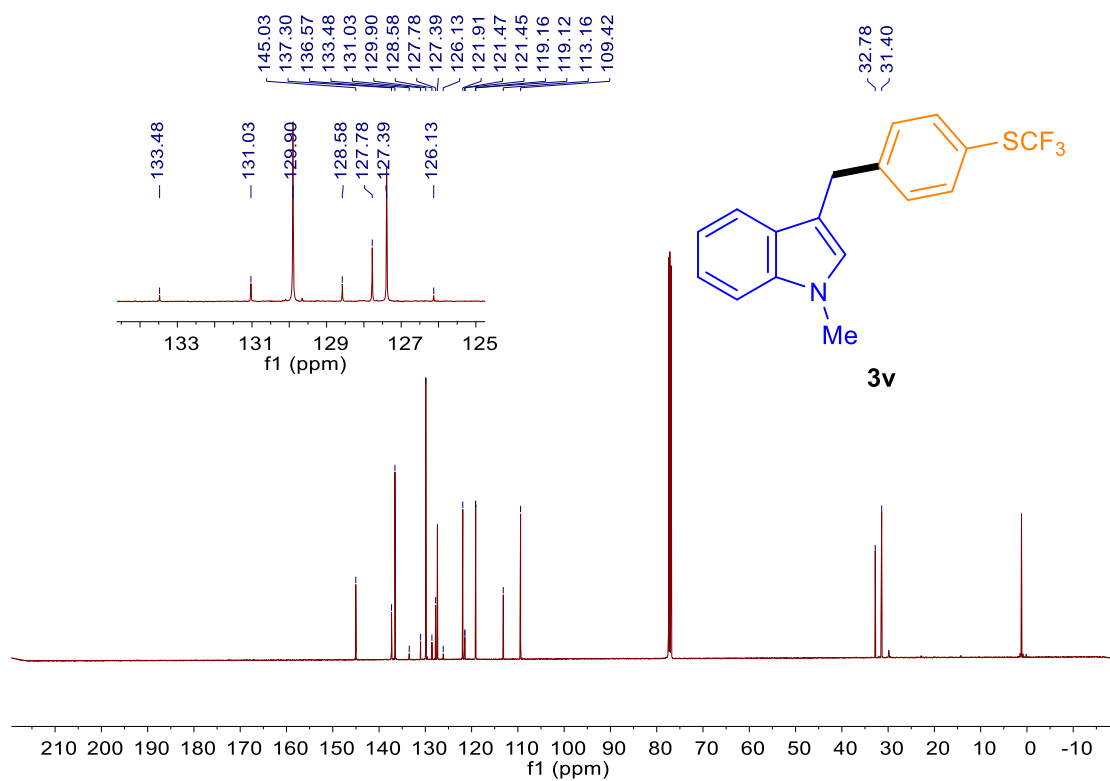

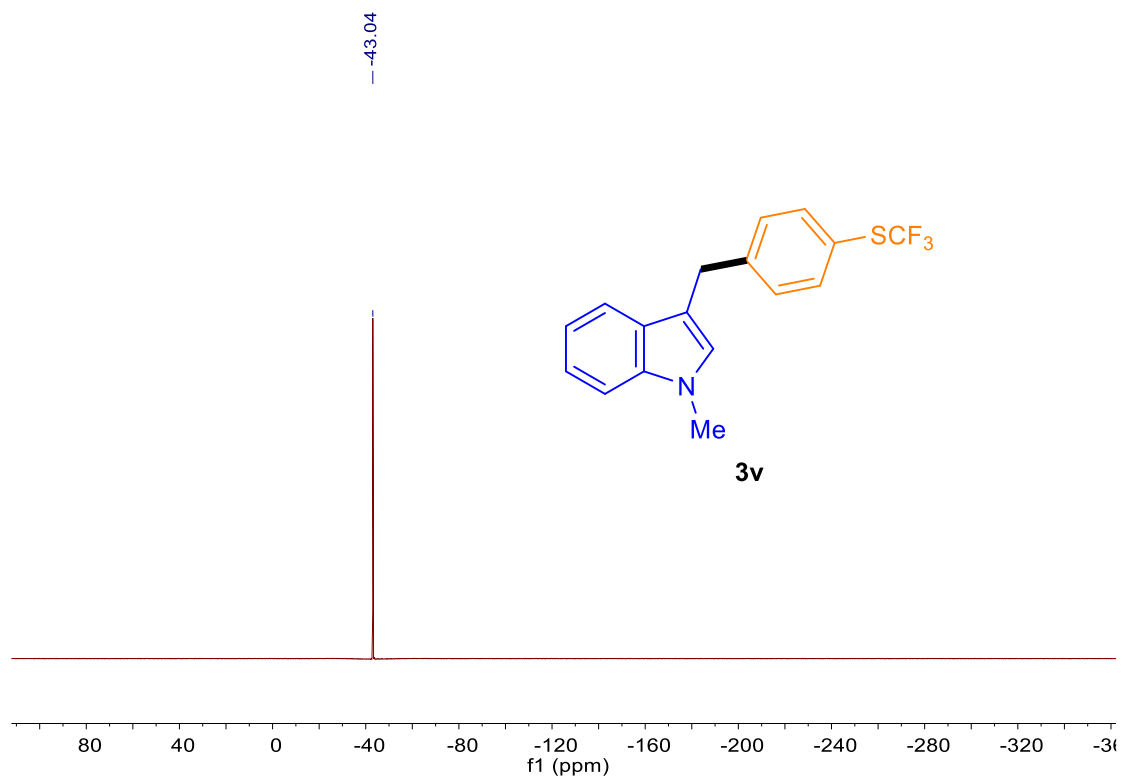

$^1\text{H}$  NMR (400 MHz),  $^{13}\text{C}\{^1\text{H}\}$  NMR (125 MHz) and  $^{19}\text{F}$  NMR (376 MHz) spectra of **3v** ( $\text{CDCl}_3$ , rt).

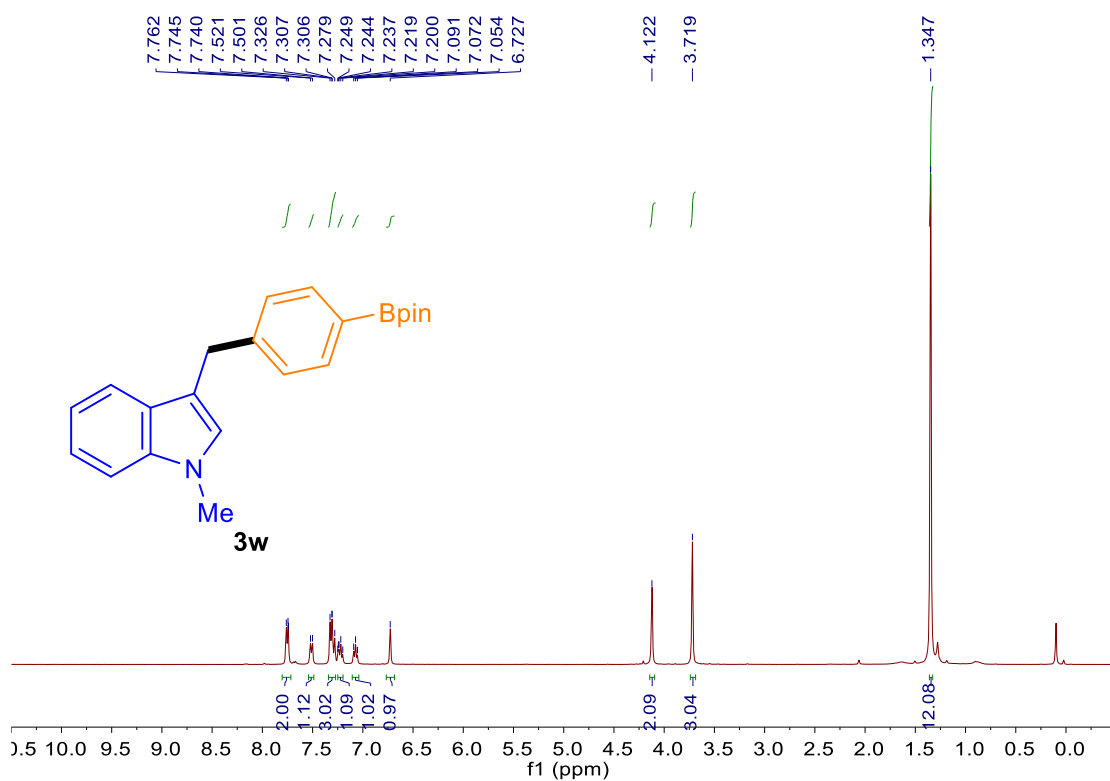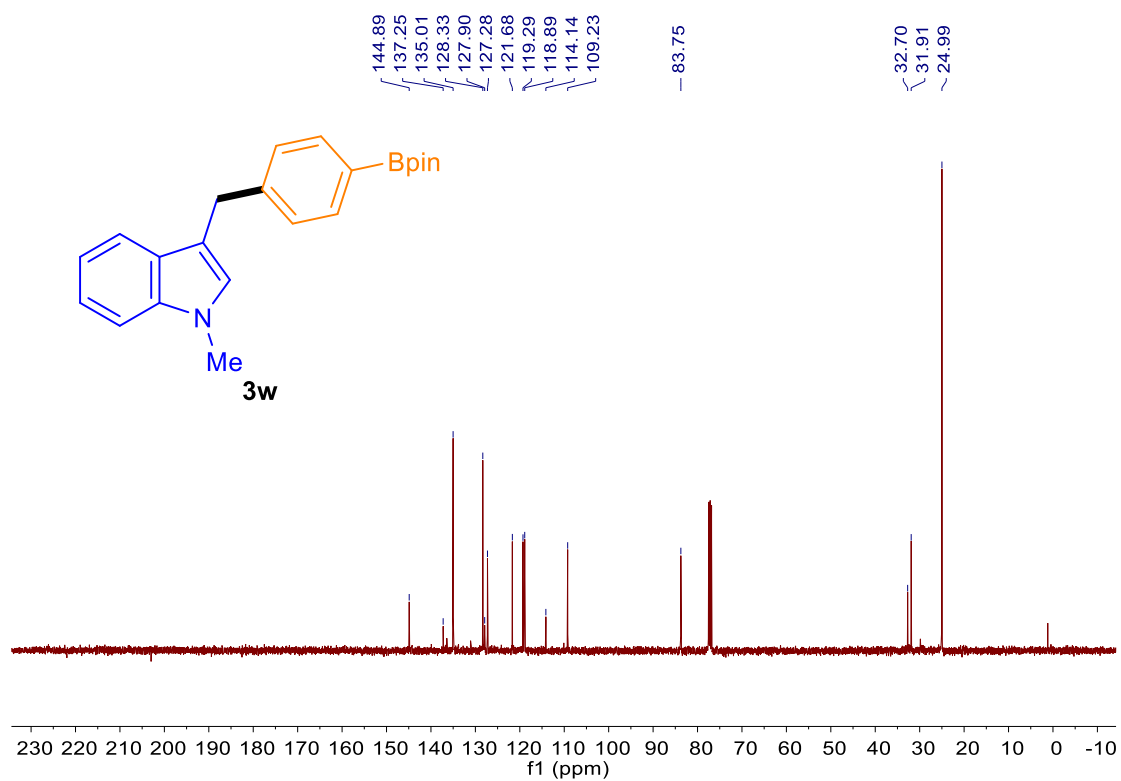

<sup>1</sup>H NMR (400 MHz) and <sup>13</sup>C{<sup>1</sup>H} NMR (100 MHz) spectra of **3w** (CDCl<sub>3</sub>, rt).

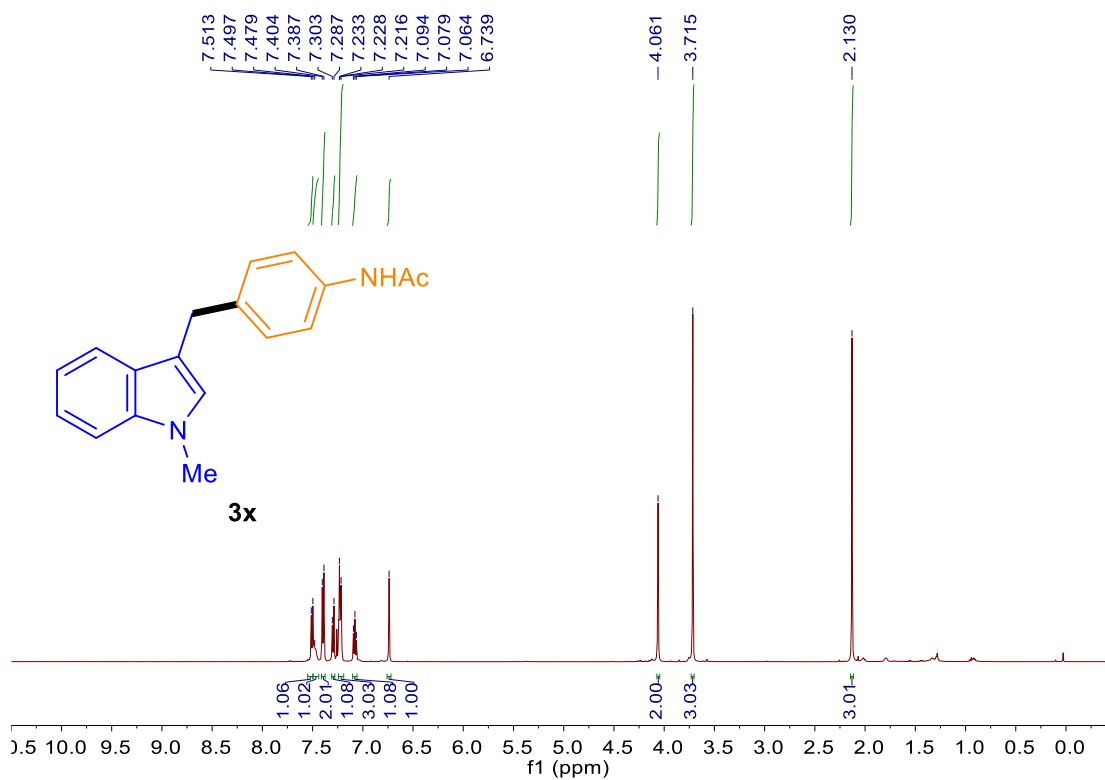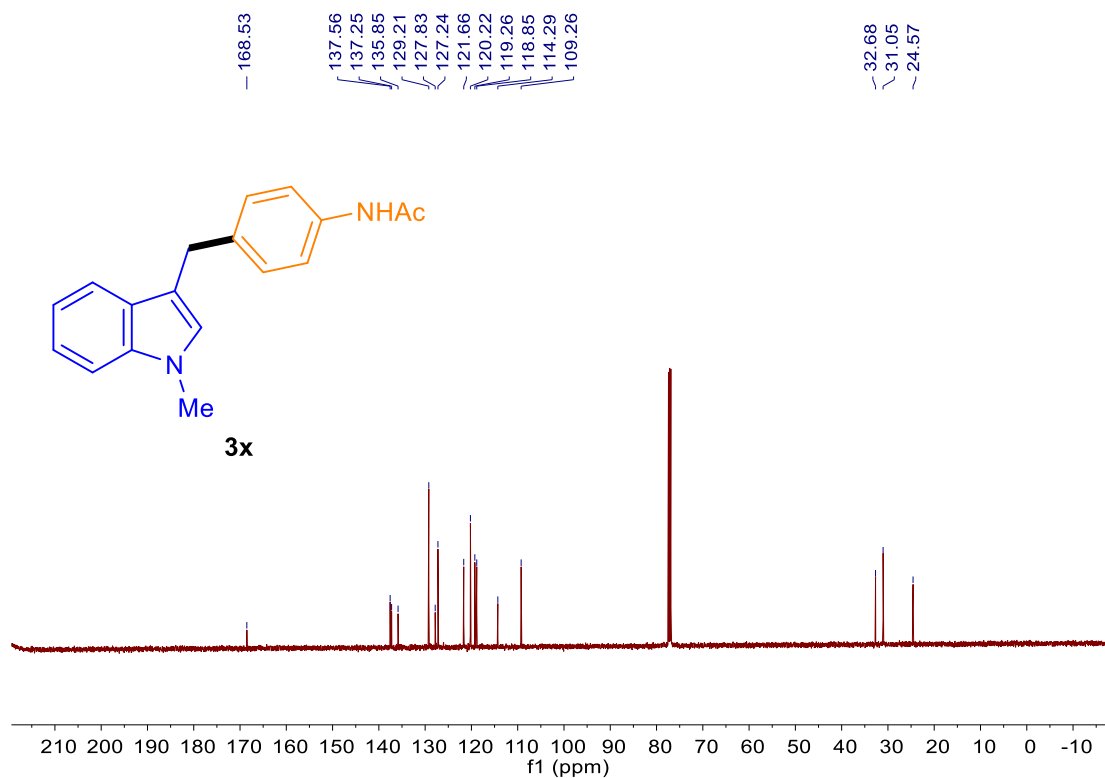

<sup>1</sup>H NMR (500 MHz) and <sup>13</sup>C{<sup>1</sup>H} NMR (125 MHz) spectra of **3x** (CDCl<sub>3</sub>, rt).



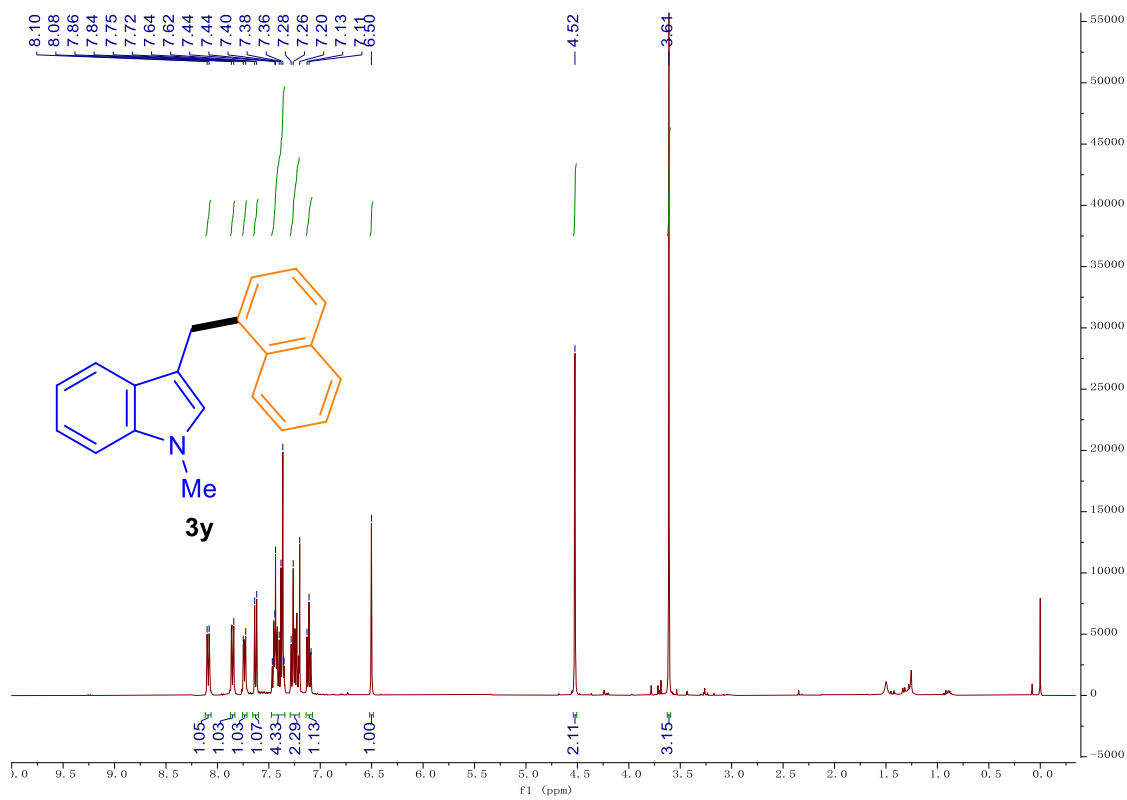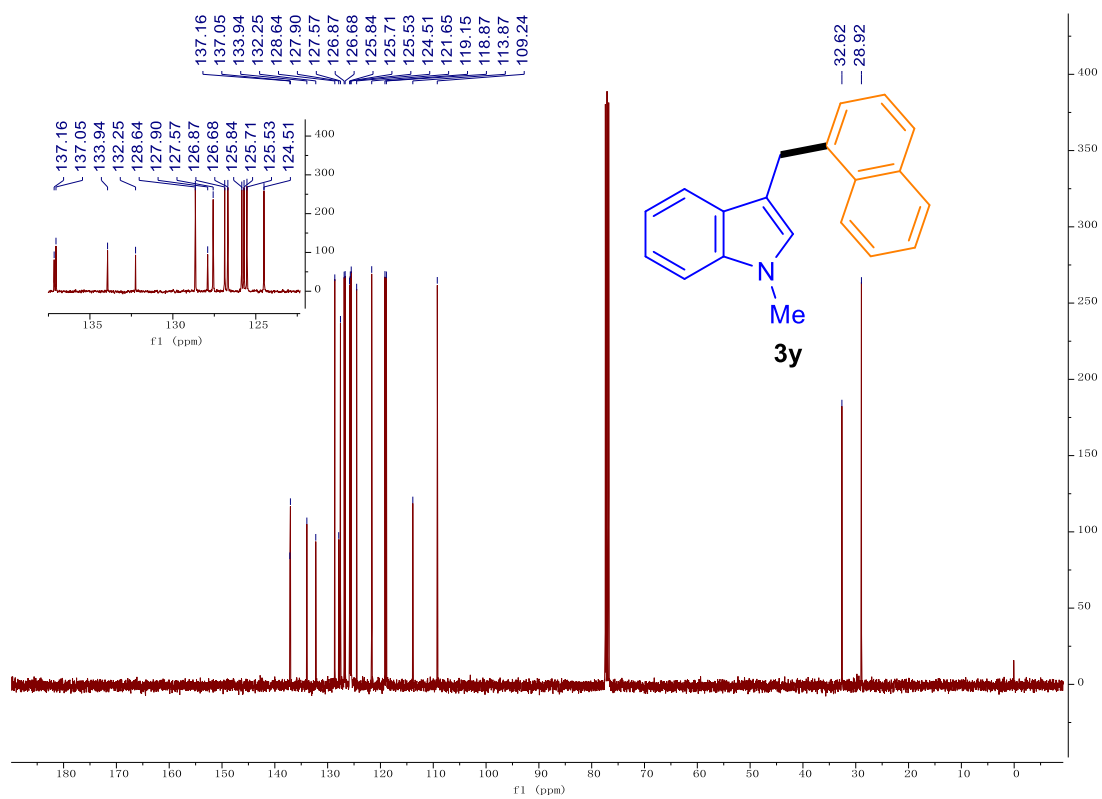

<sup>1</sup>H NMR (400 MHz) and <sup>13</sup>C{<sup>1</sup>H} NMR (100 MHz) spectra of **3y** (CDCl<sub>3</sub>, rt).

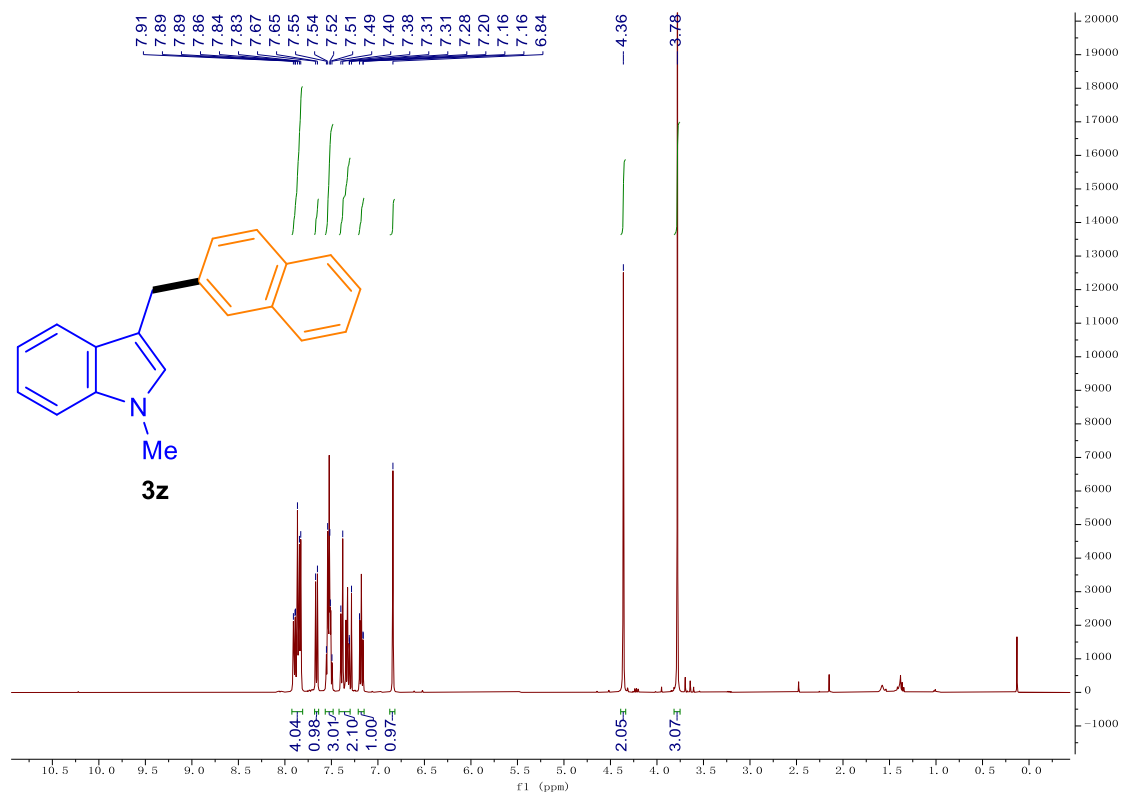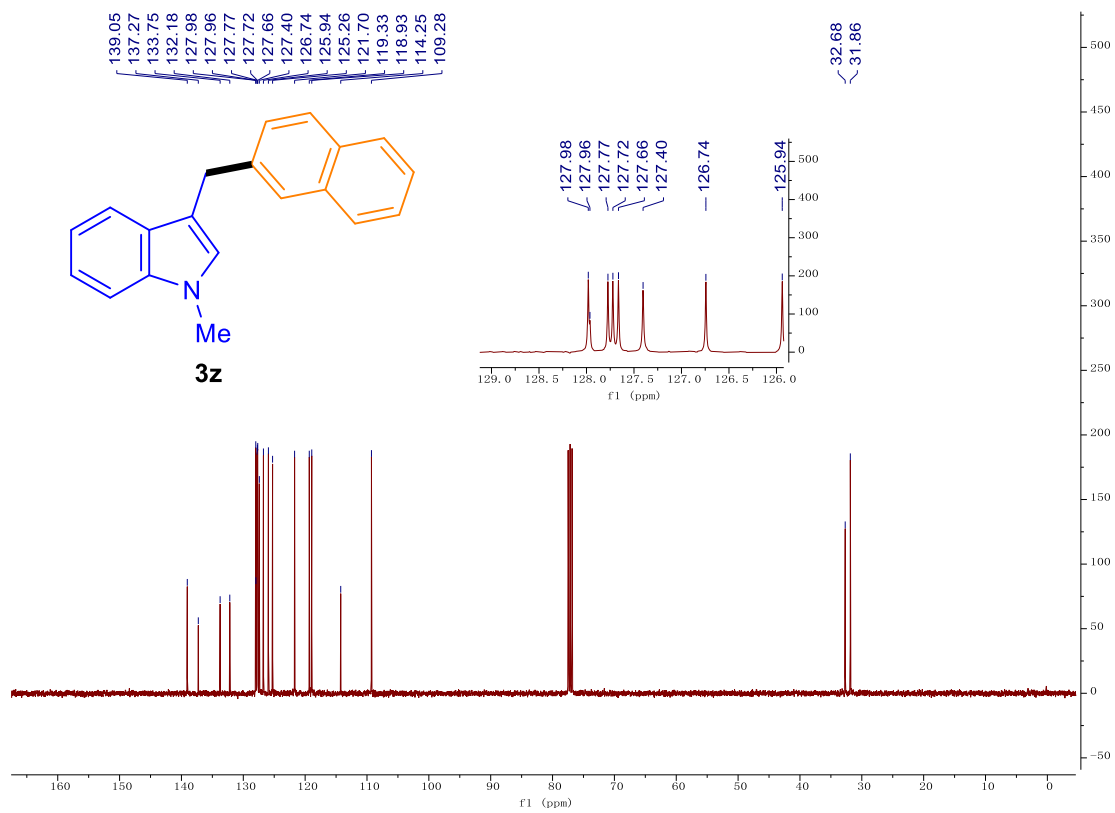

**<sup>1</sup>H NMR (400 MHz) and <sup>13</sup>C{<sup>1</sup>H} NMR (100 MHz) spectra of 3z (CDCl<sub>3</sub>, rt).**

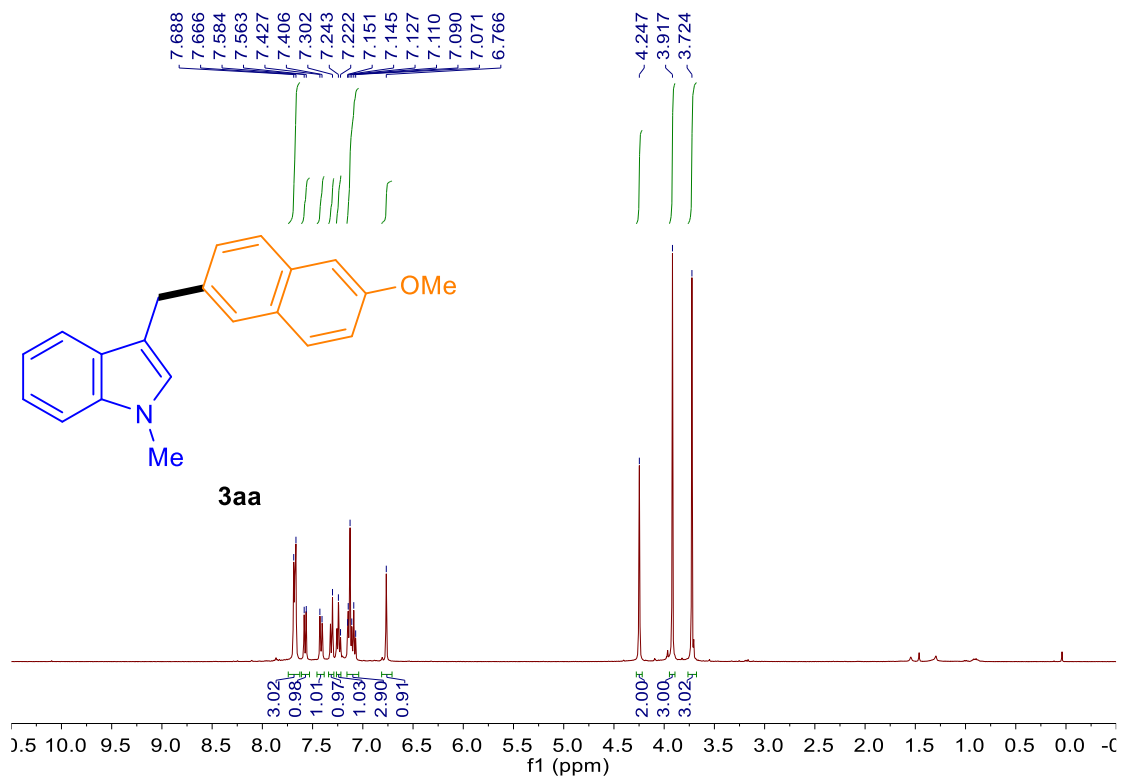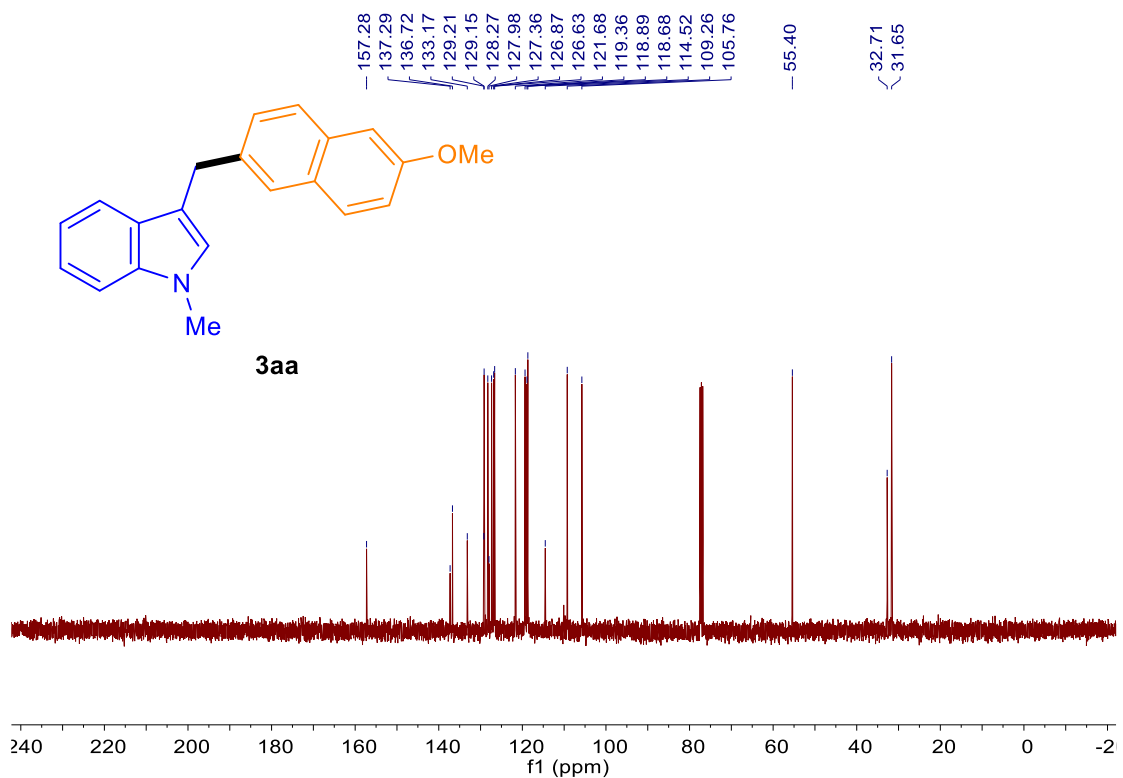

<sup>1</sup>H NMR (400 MHz) and <sup>13</sup>C{<sup>1</sup>H} NMR (100 MHz) spectra of **3aa** (CDCl<sub>3</sub>, rt).

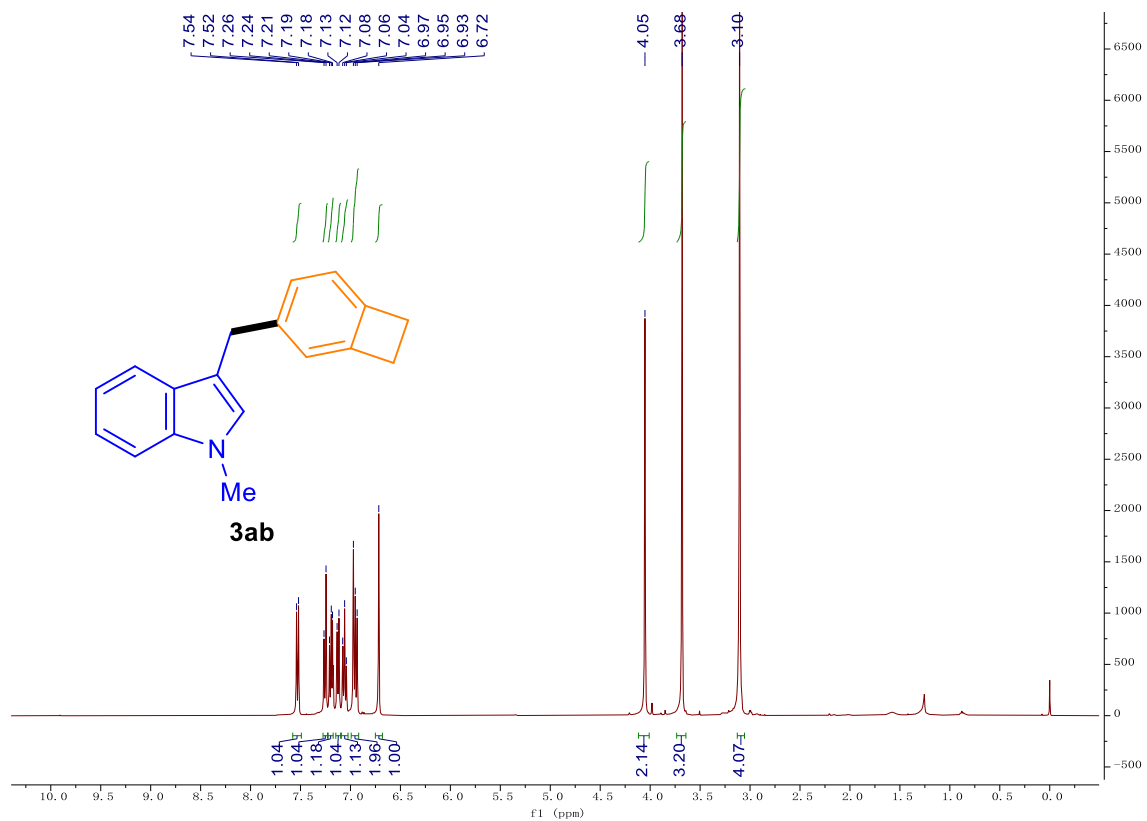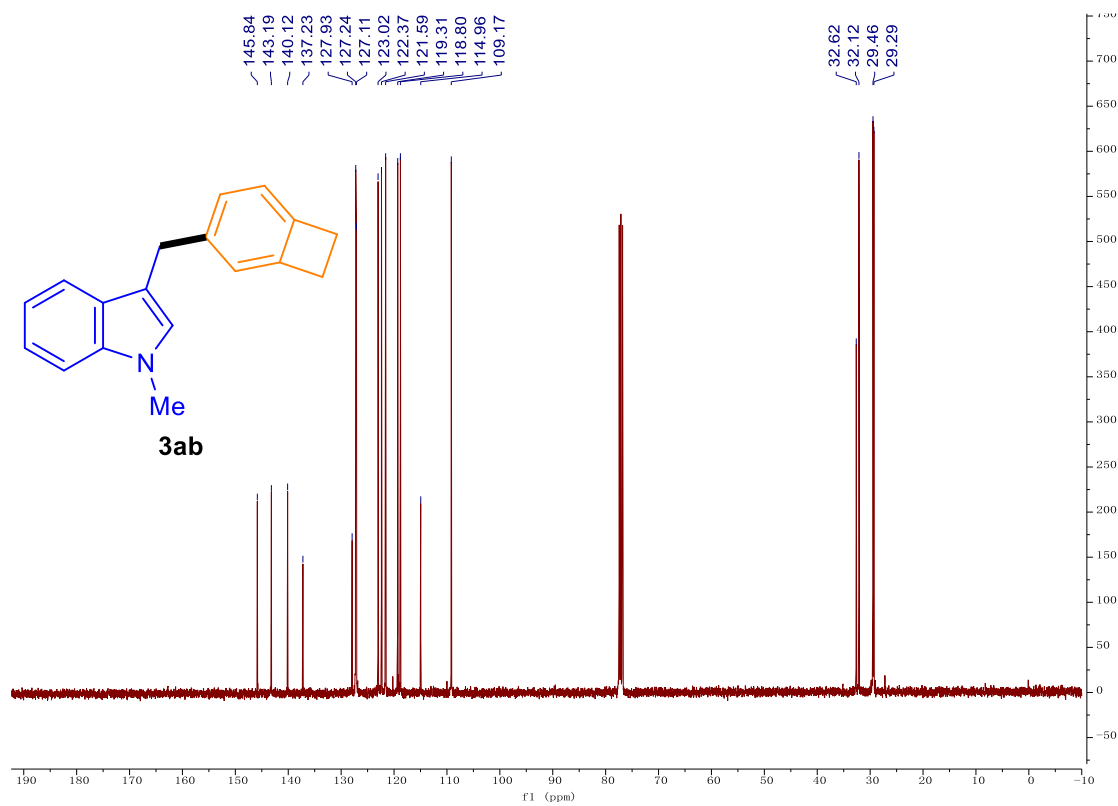

<sup>1</sup>H NMR (400 MHz) and <sup>13</sup>C{<sup>1</sup>H} NMR (100 MHz) spectra of **3ab** (CDCl<sub>3</sub>, rt).

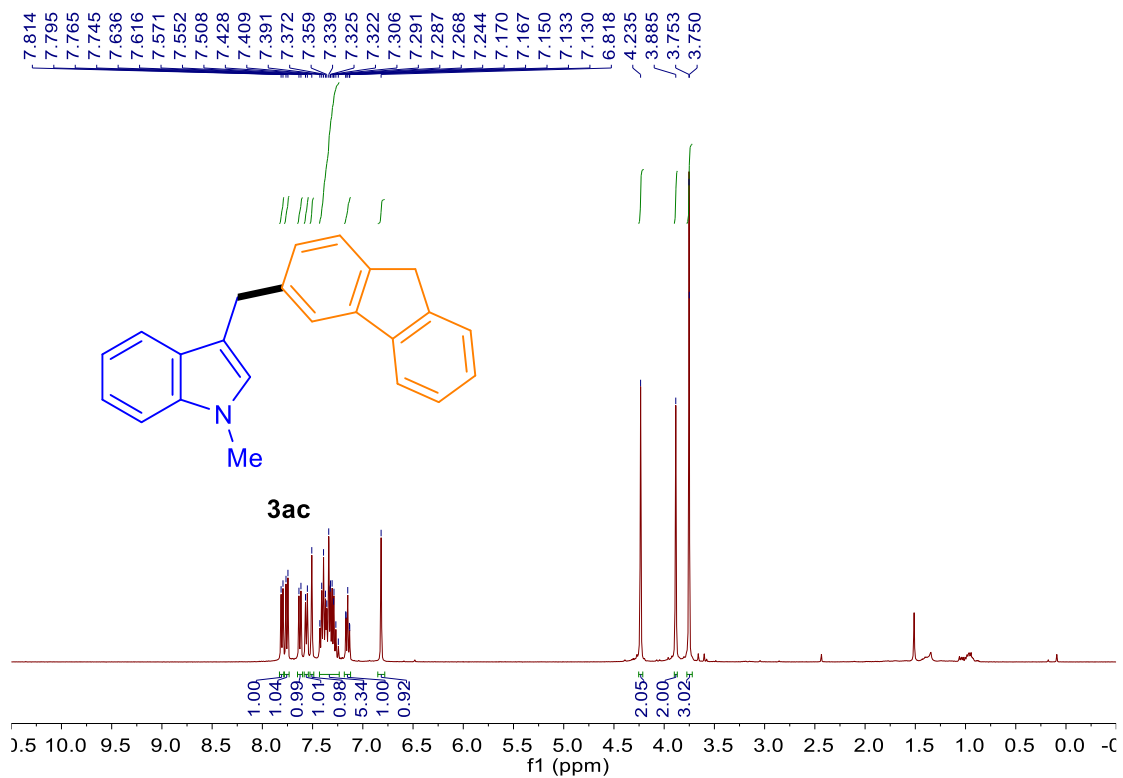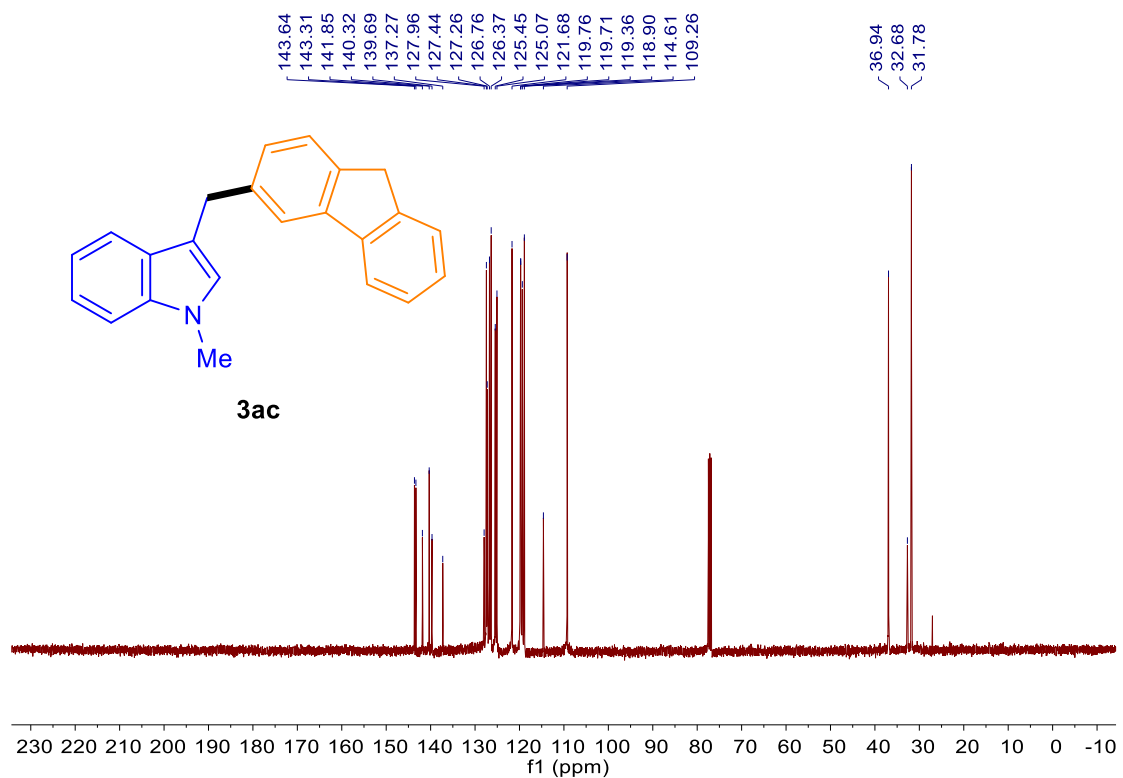

$^1\text{H}$  NMR (400 MHz) and  $^{13}\text{C}\{^1\text{H}\}$  NMR (100 MHz) spectra of **3ac** ( $\text{CDCl}_3$ , rt).

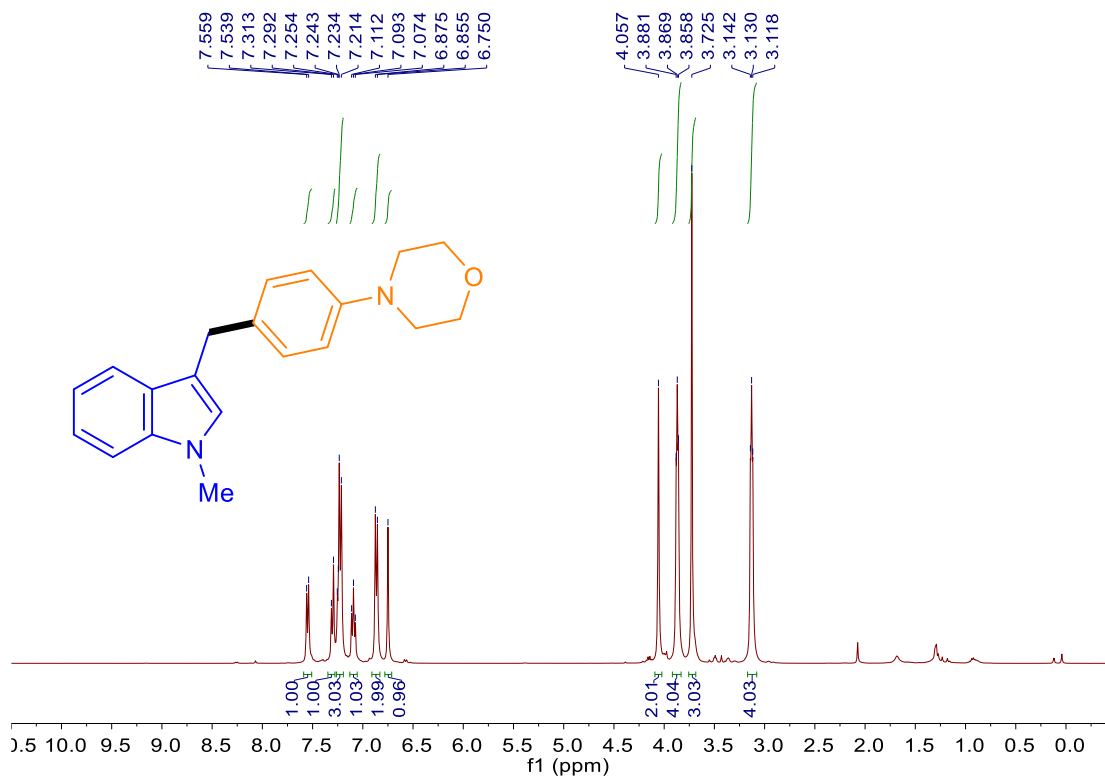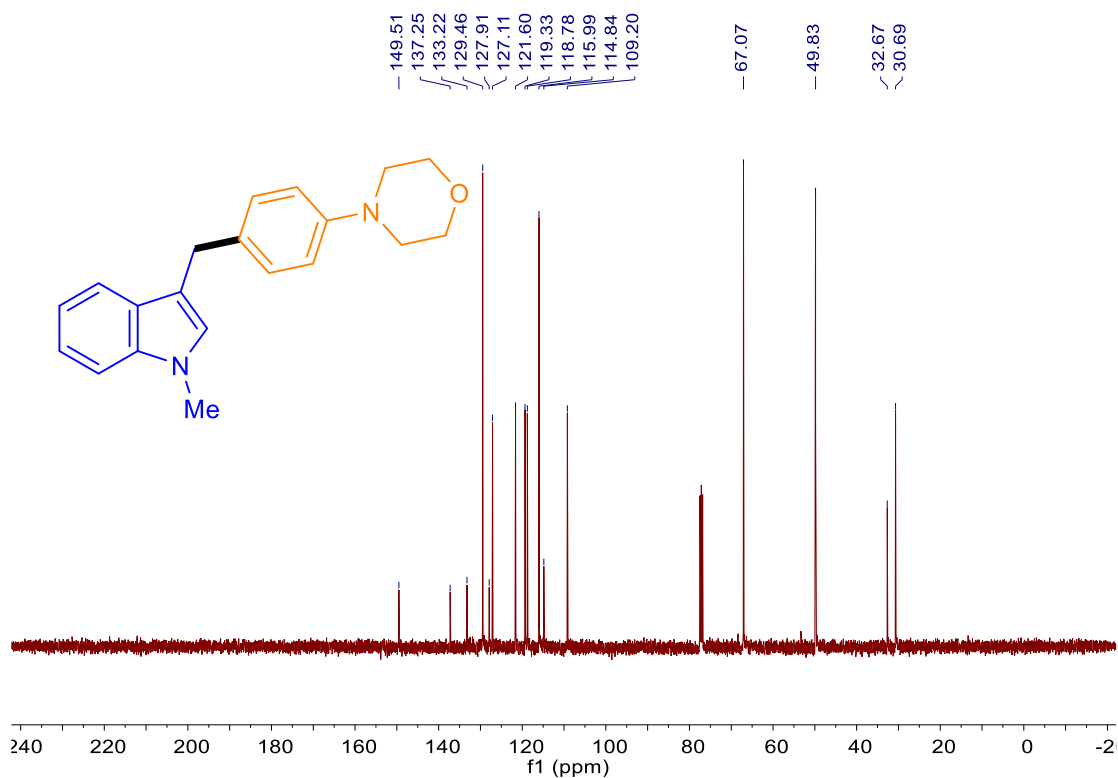

<sup>1</sup>H NMR (400 MHz) and <sup>13</sup>C{<sup>1</sup>H} NMR (100 MHz) spectra of **3ad** (CDCl<sub>3</sub>, rt).

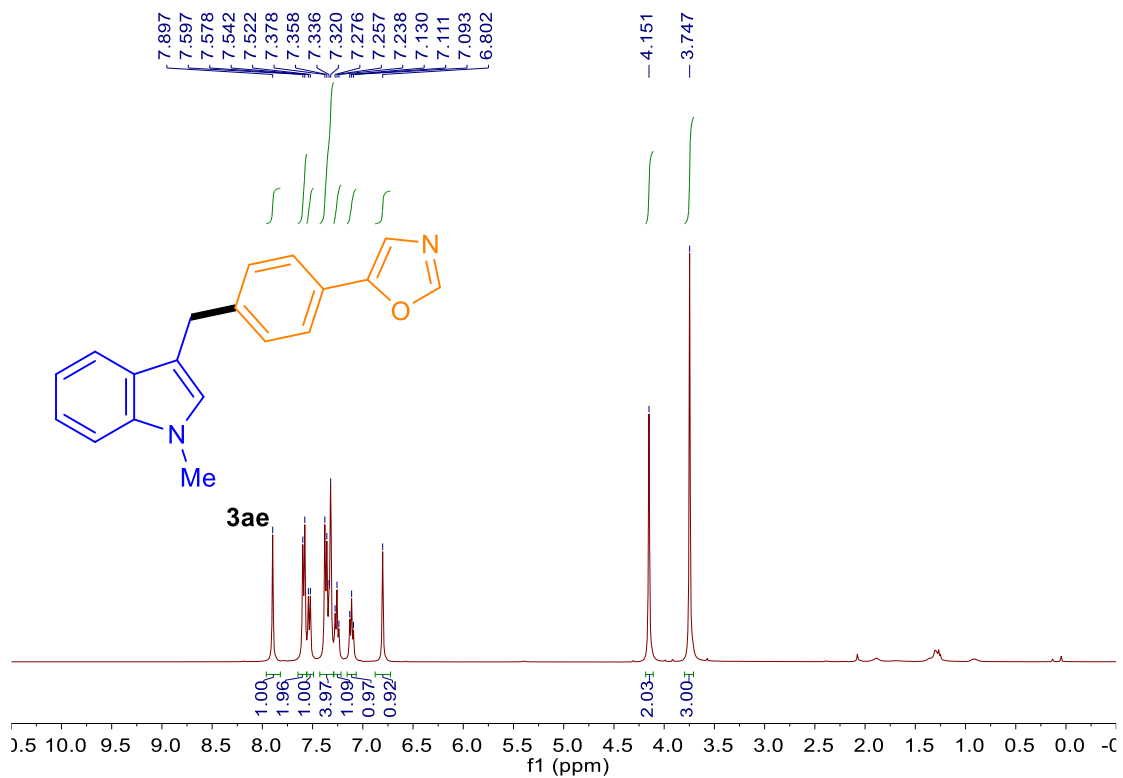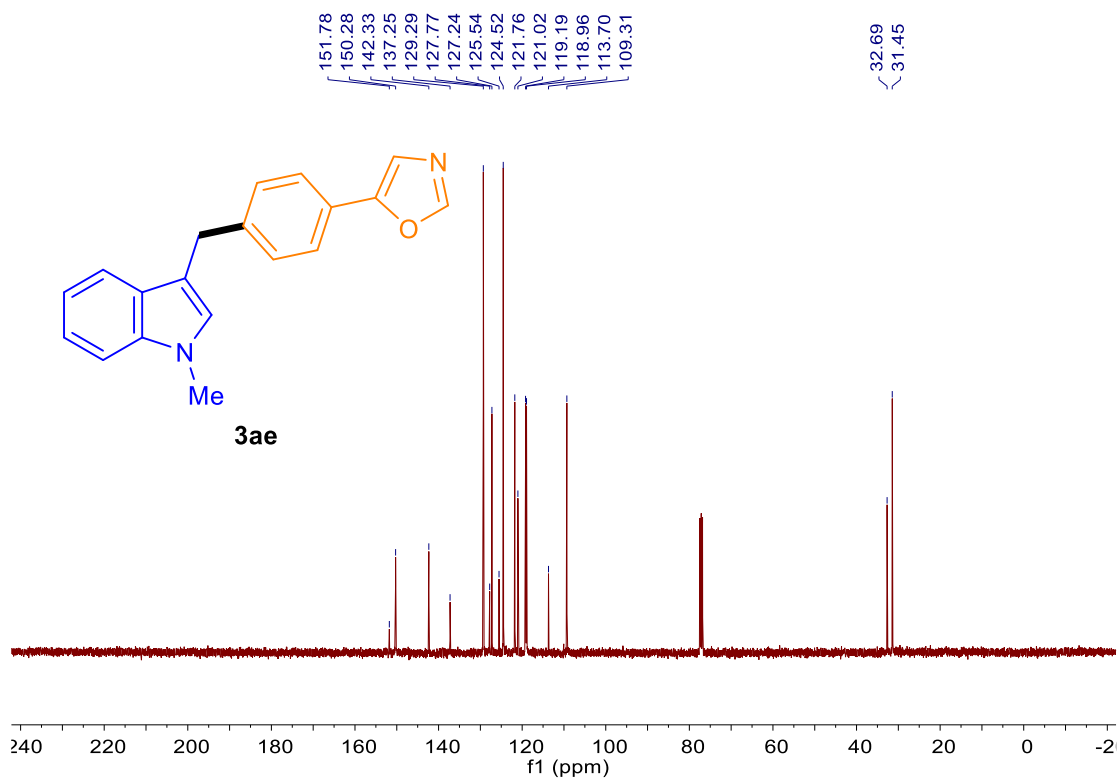

$^1\text{H}$  NMR (400 MHz) and  $^{13}\text{C}\{^1\text{H}\}$  NMR (100 MHz) spectra of **3ae** ( $\text{CDCl}_3$ , rt).

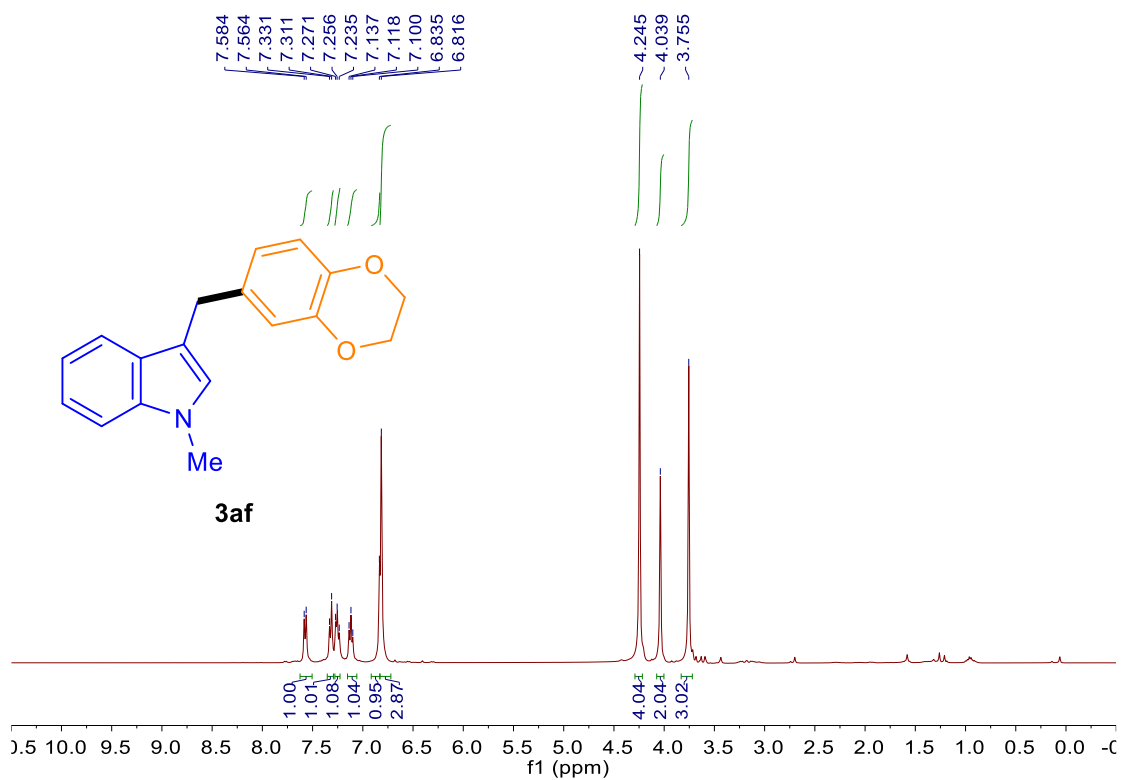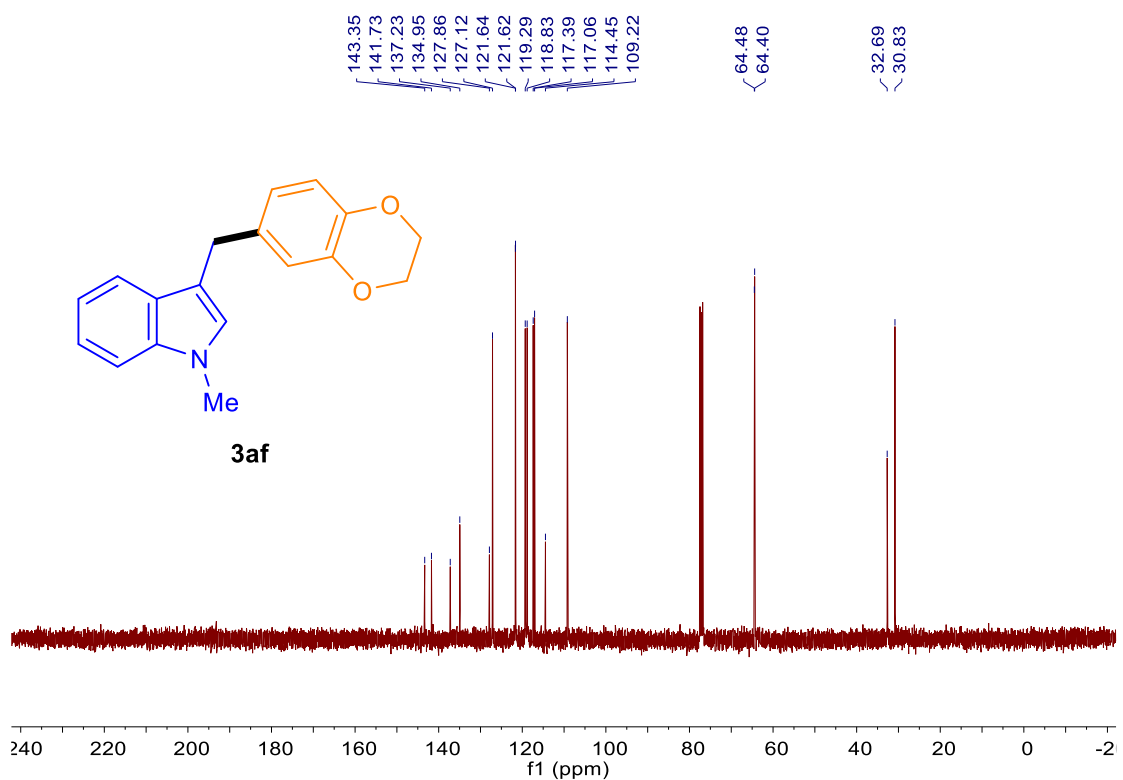

<sup>1</sup>H NMR (400 MHz) and <sup>13</sup>C{<sup>1</sup>H} NMR (100 MHz) spectra of **3af** (CDCl<sub>3</sub>, rt).



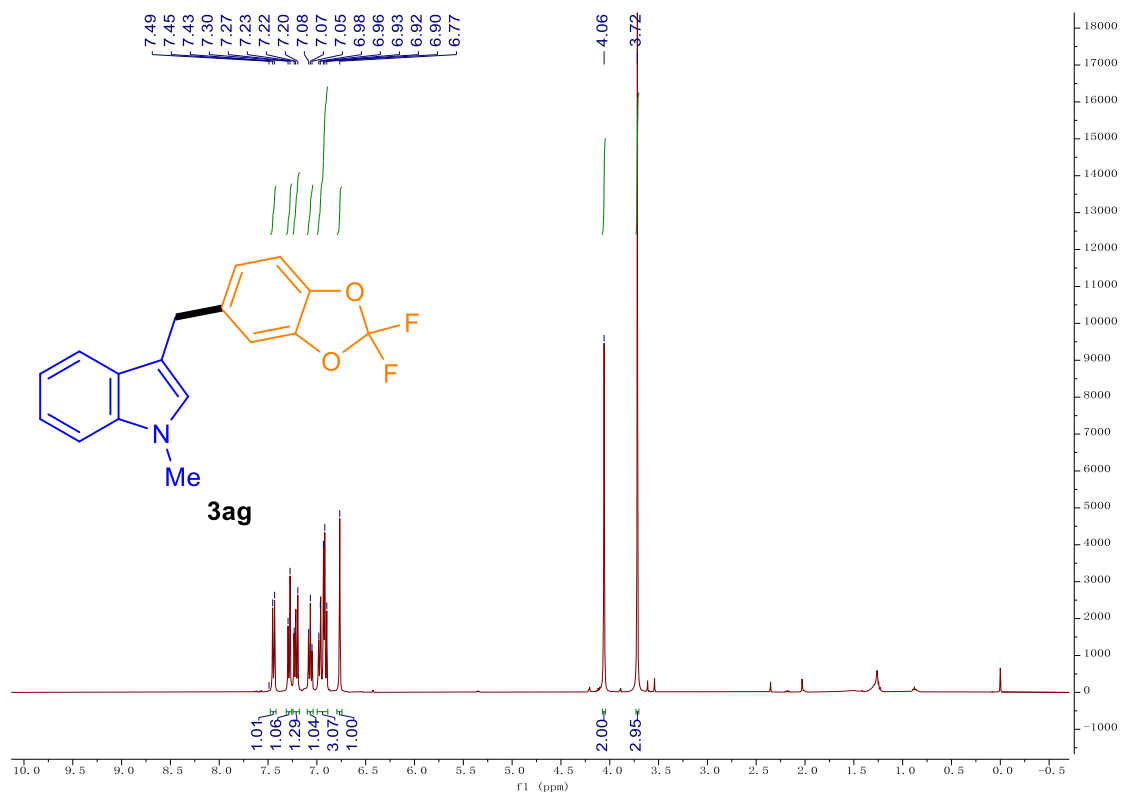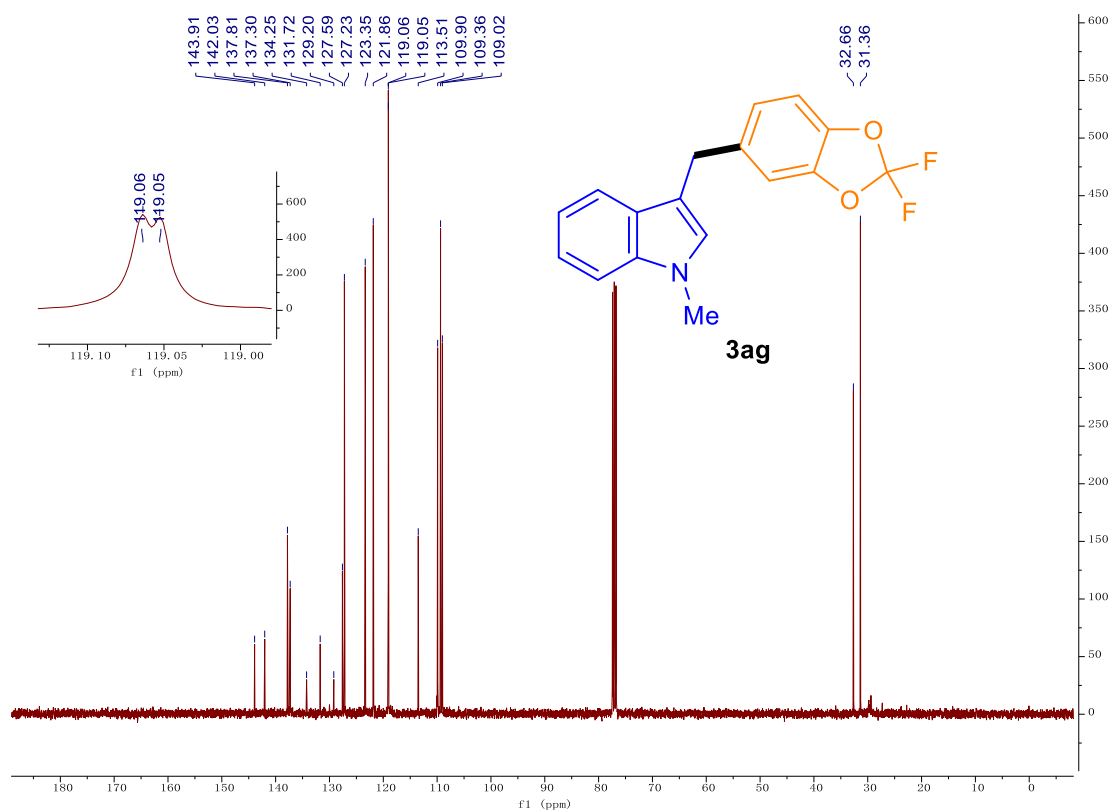

<sup>1</sup>H NMR (400 MHz) and <sup>13</sup>C{<sup>1</sup>H} NMR (100 MHz) spectra of **3ag** (CDCl<sub>3</sub>, rt).

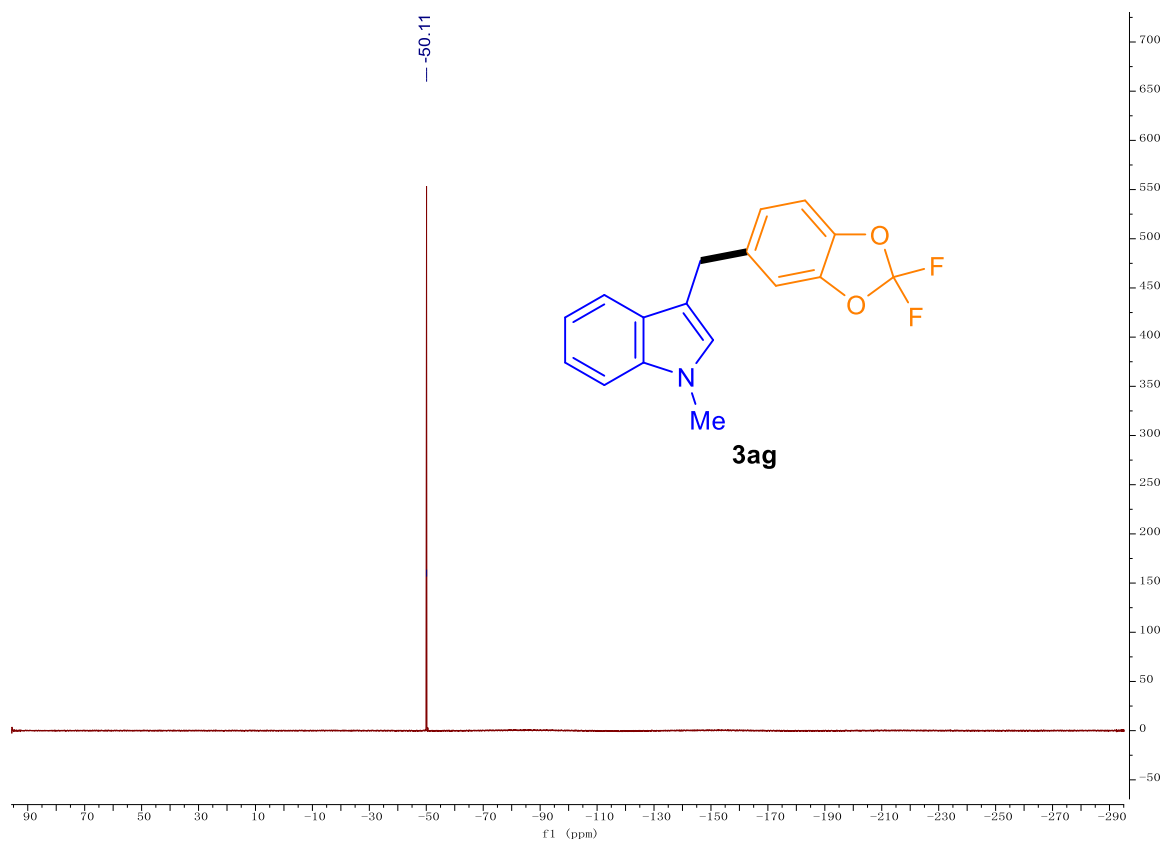

$^1\text{H}$  NMR (400 MHz),  $^{13}\text{C}\{^1\text{H}\}$  NMR (100 MHz) and  $^{19}\text{F}$  NMR (376 MHz) spectra of **3ag** ( $\text{CDCl}_3$ , rt).

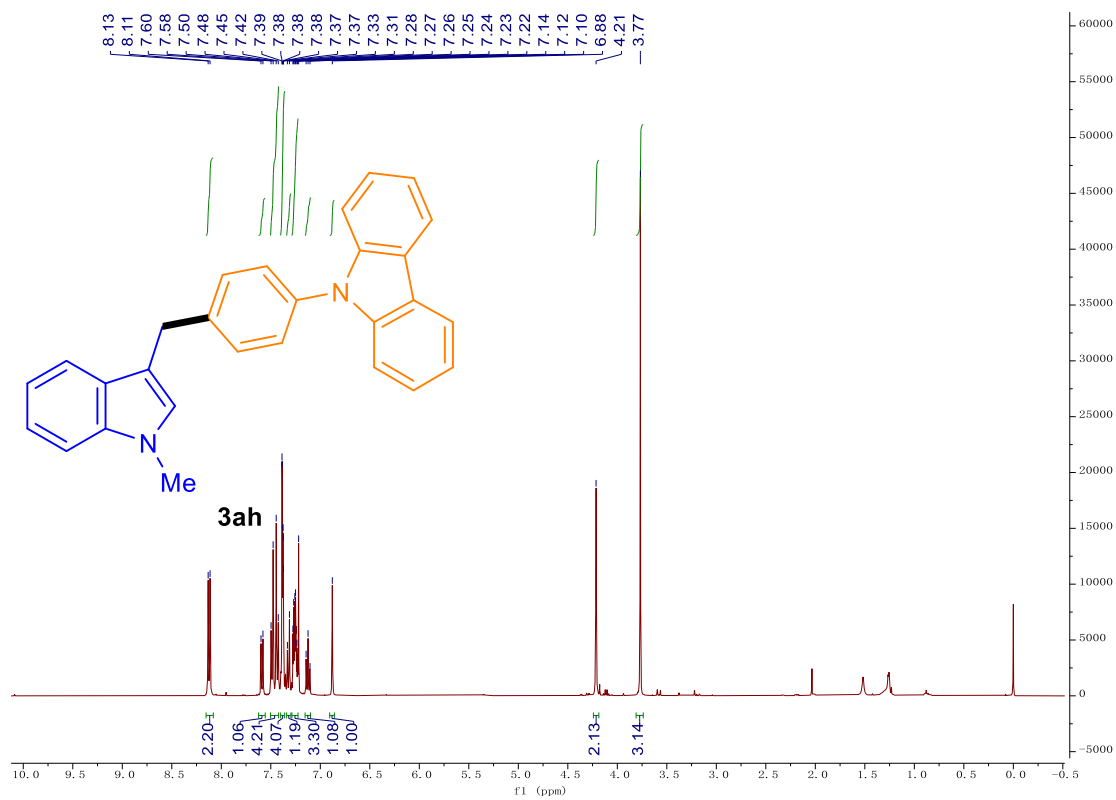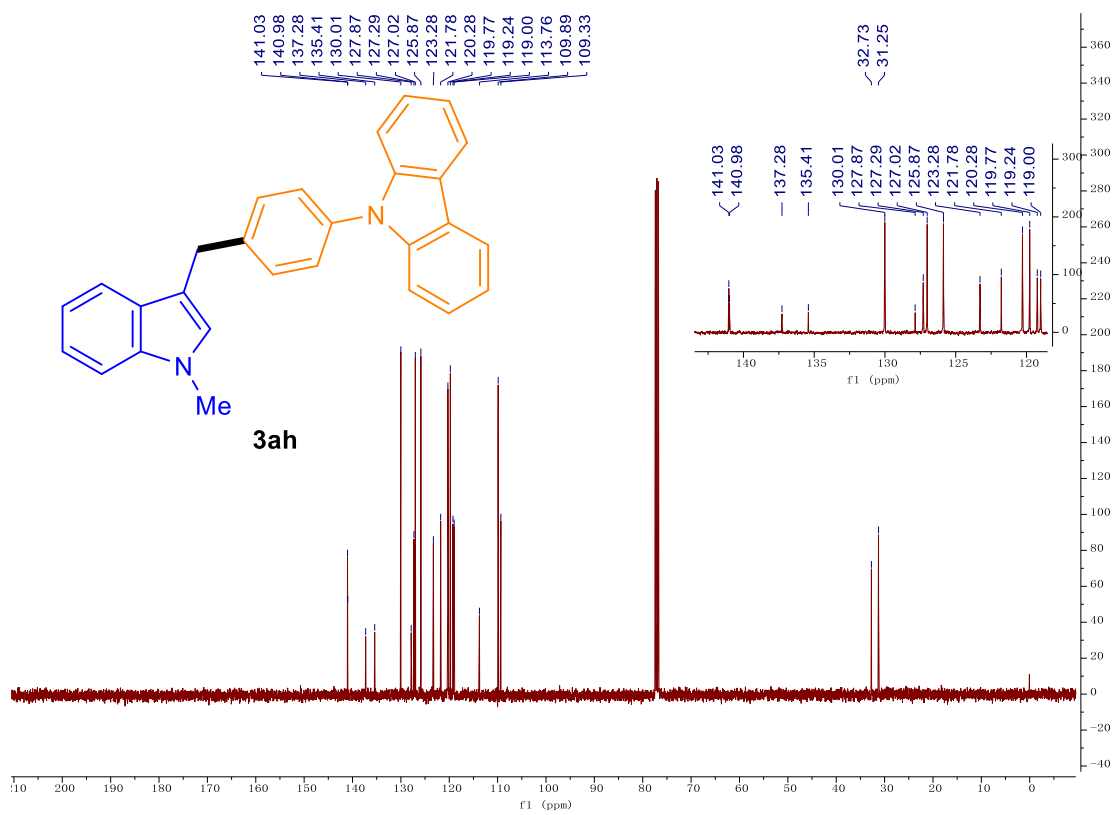

<sup>1</sup>H NMR (400 MHz) and <sup>13</sup>C{<sup>1</sup>H} NMR (100 MHz) spectra of **3ah** (CDCl<sub>3</sub>, rt).

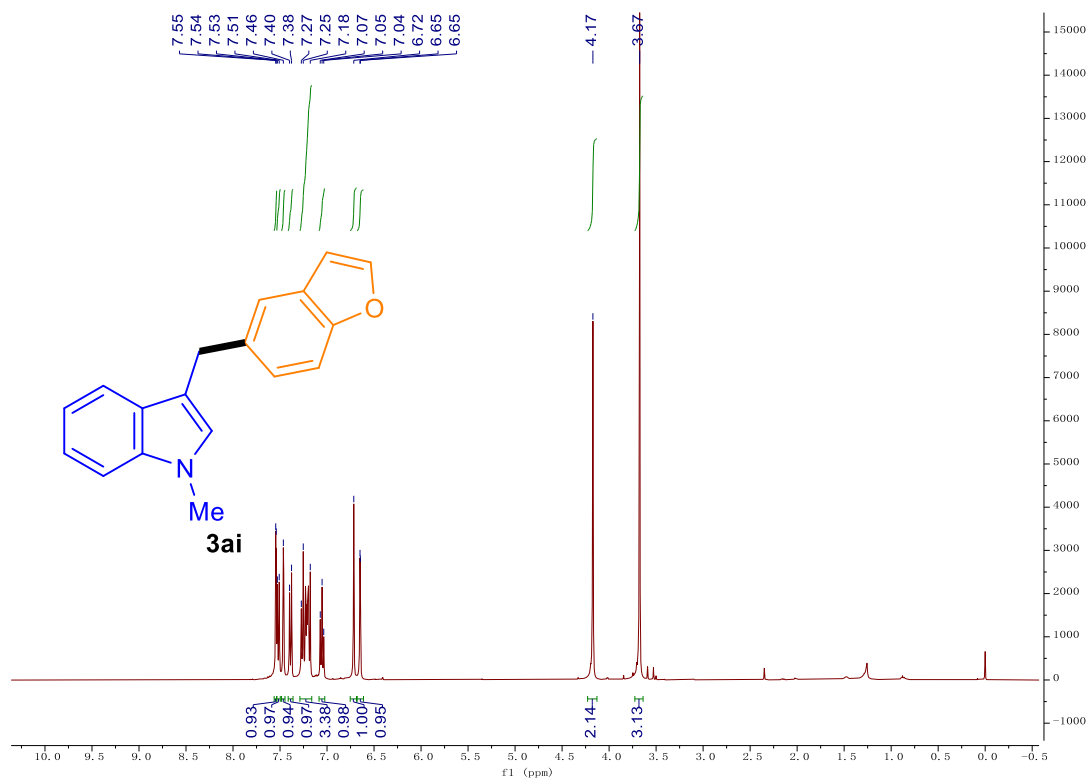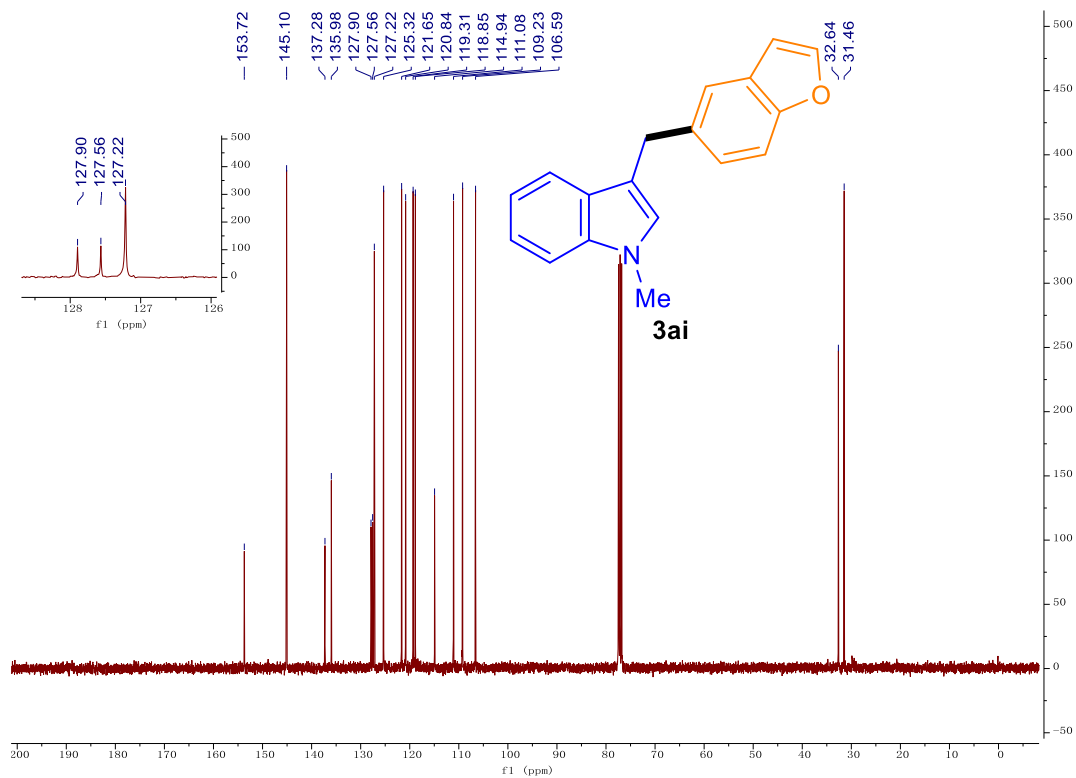

$^1\text{H}$  NMR (400 MHz) and  $^{13}\text{C}\{^1\text{H}\}$  NMR (100 MHz) spectra of **3ai** ( $\text{CDCl}_3$ , rt).

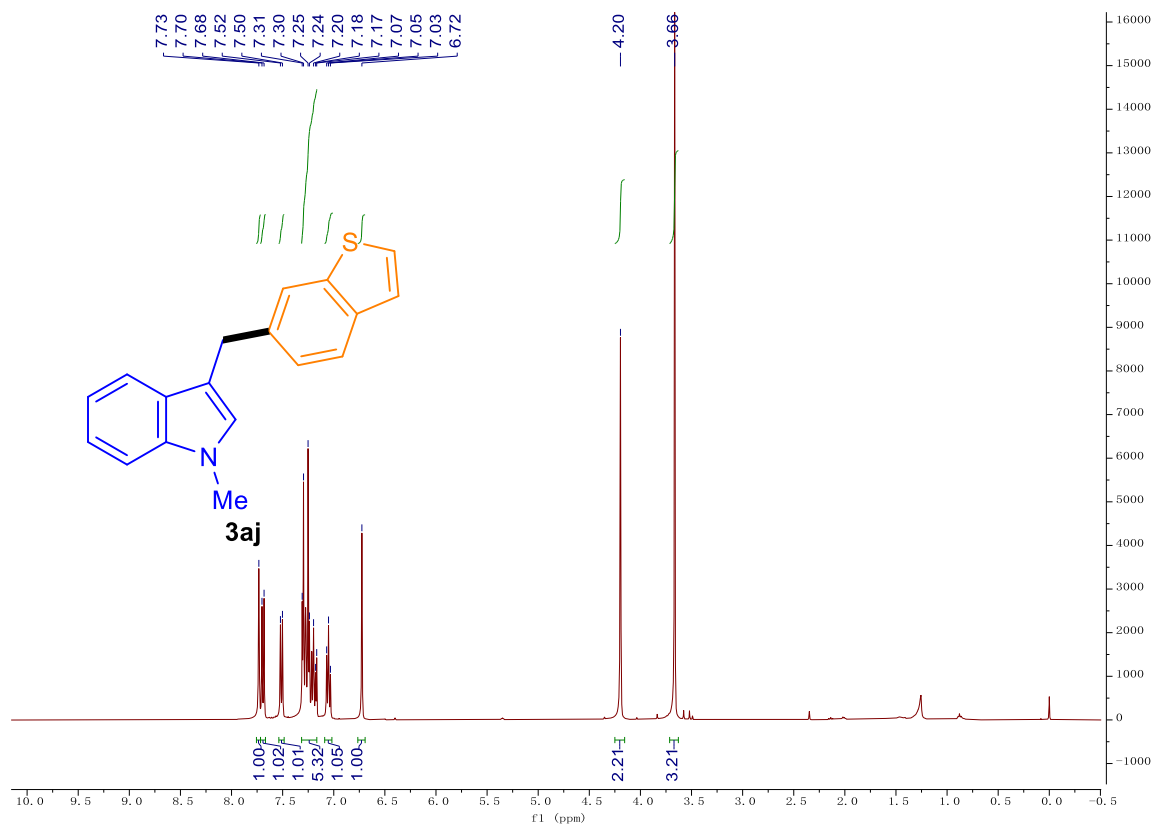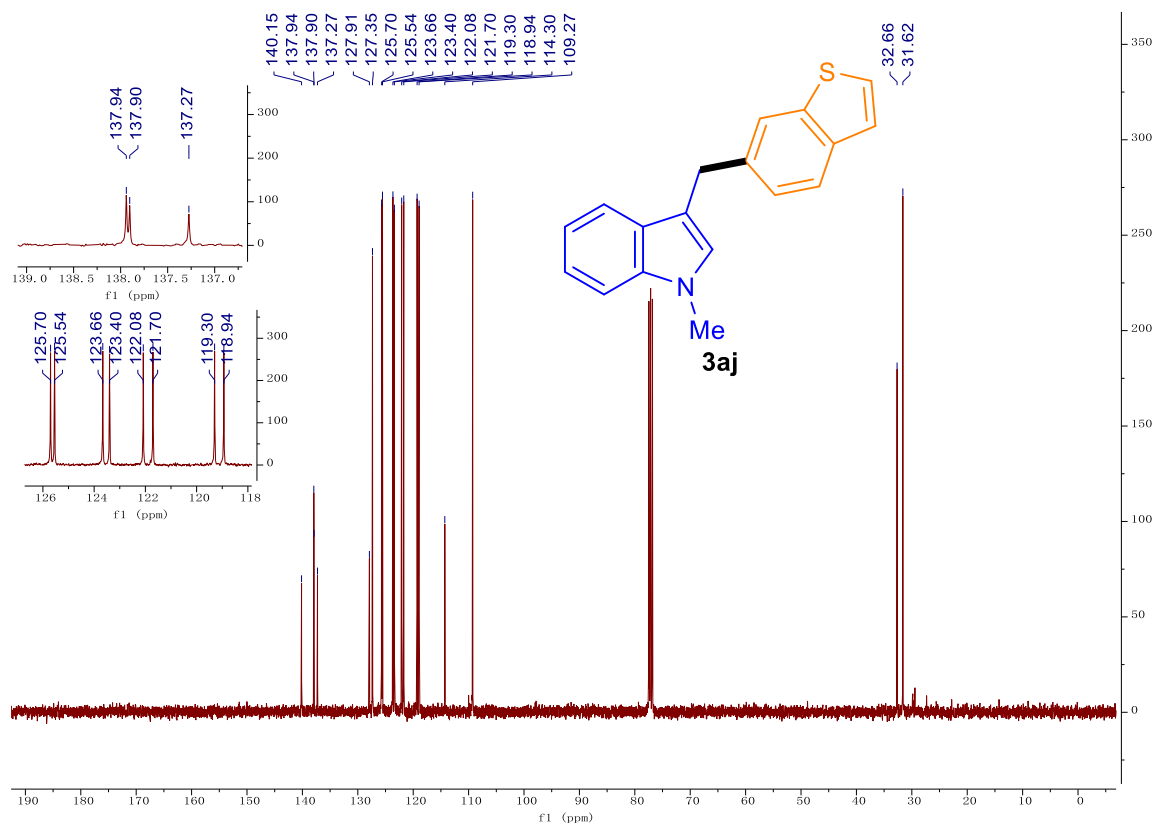

<sup>1</sup>H NMR (400 MHz) and <sup>13</sup>C{<sup>1</sup>H} NMR (100 MHz) spectra of **3aj** (CDCl<sub>3</sub>, rt).

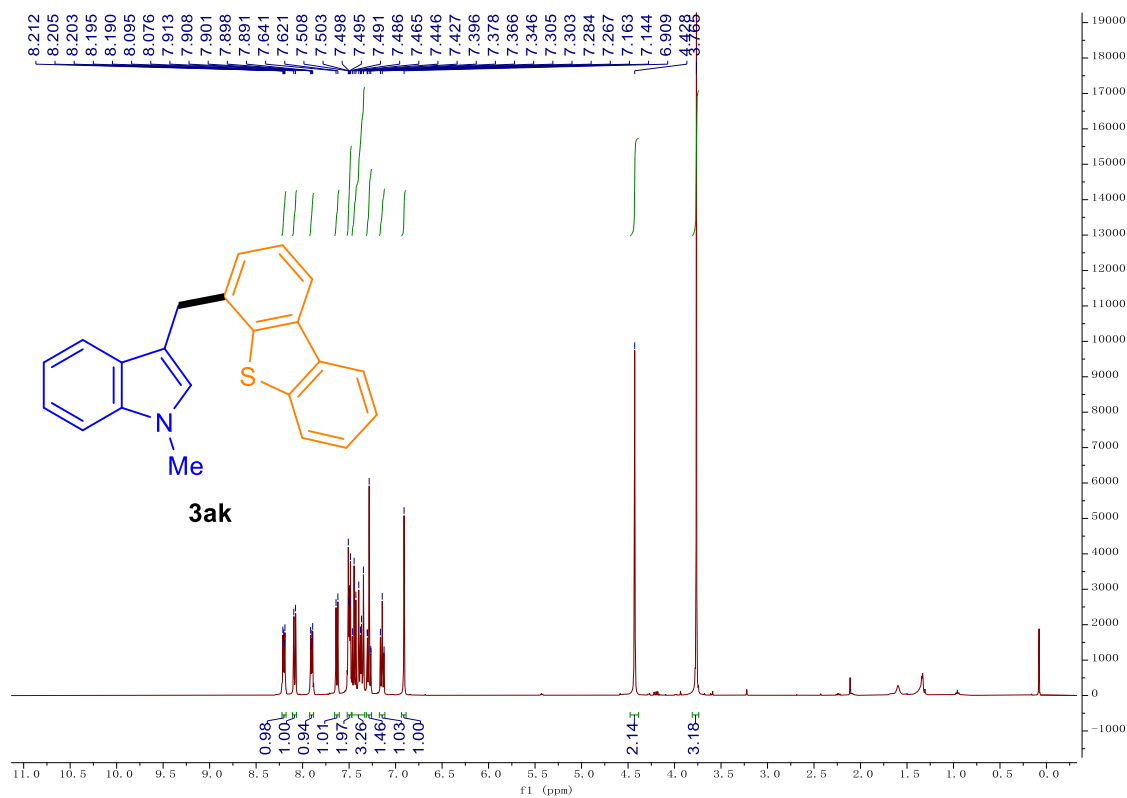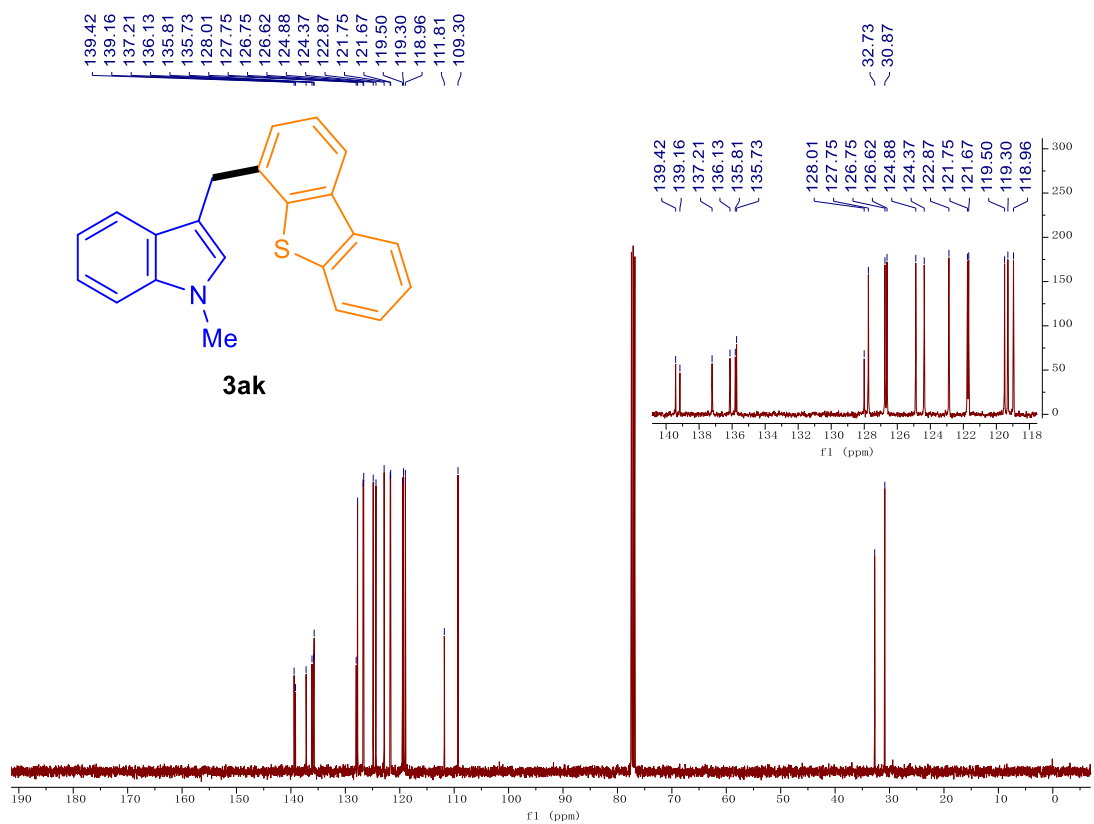

<sup>1</sup>H NMR (400 MHz) and <sup>13</sup>C{<sup>1</sup>H} NMR (100 MHz) spectra of **3ak** (CDCl<sub>3</sub>, rt).

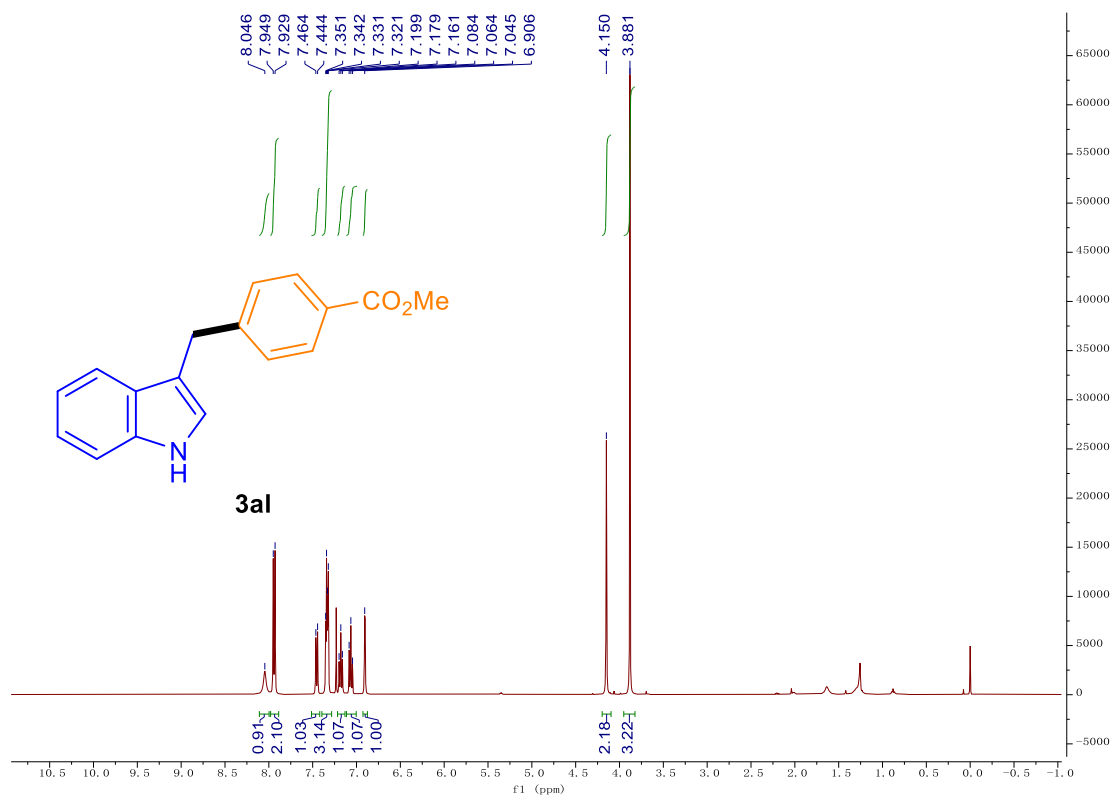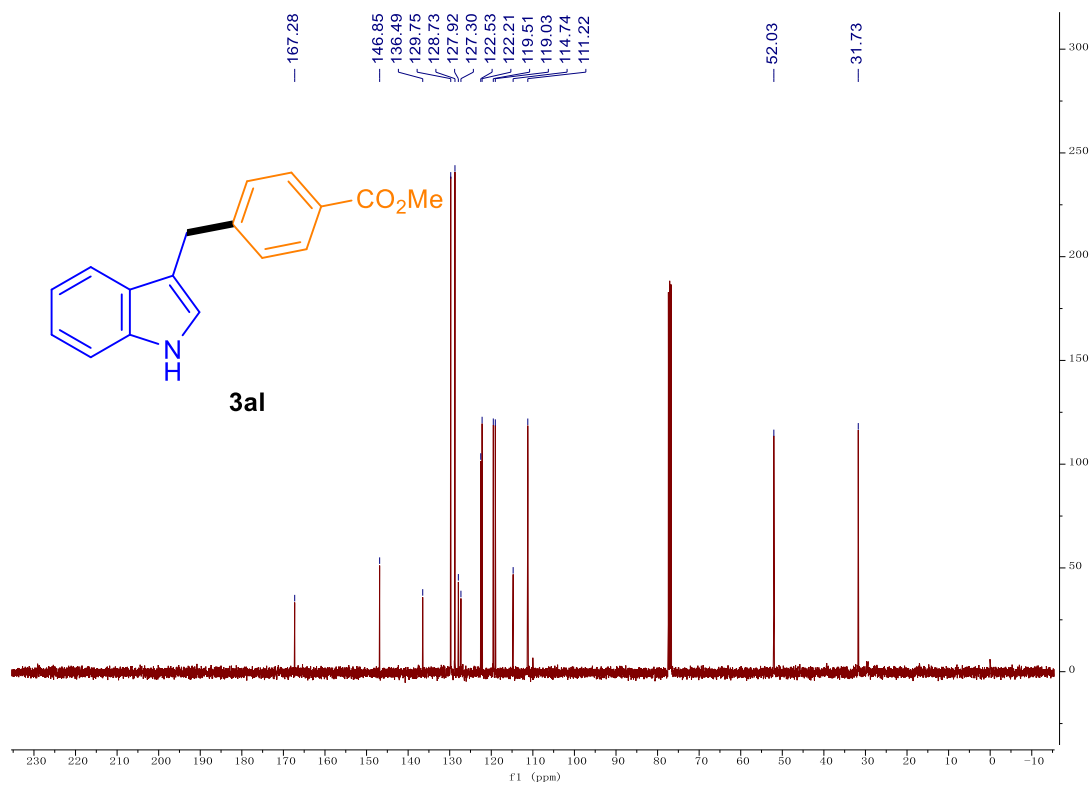

<sup>1</sup>H NMR (400 MHz) and <sup>13</sup>C{<sup>1</sup>H} NMR (100 MHz) spectra of **3al** (CDCl<sub>3</sub>, rt).

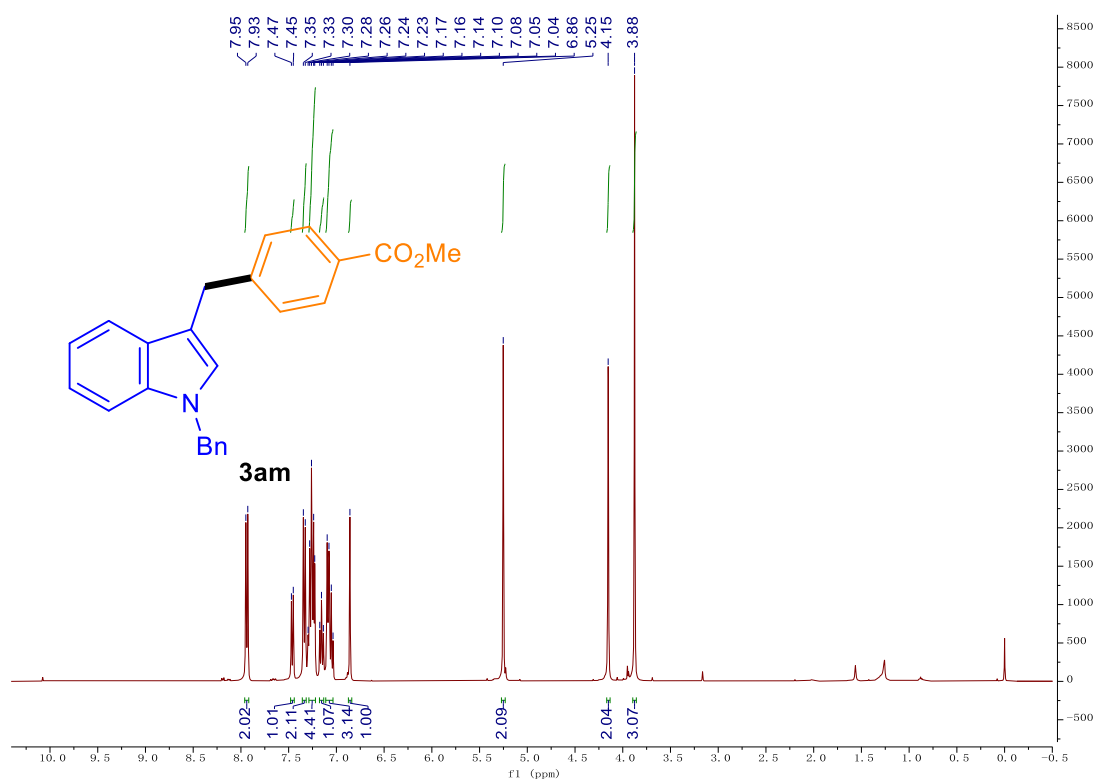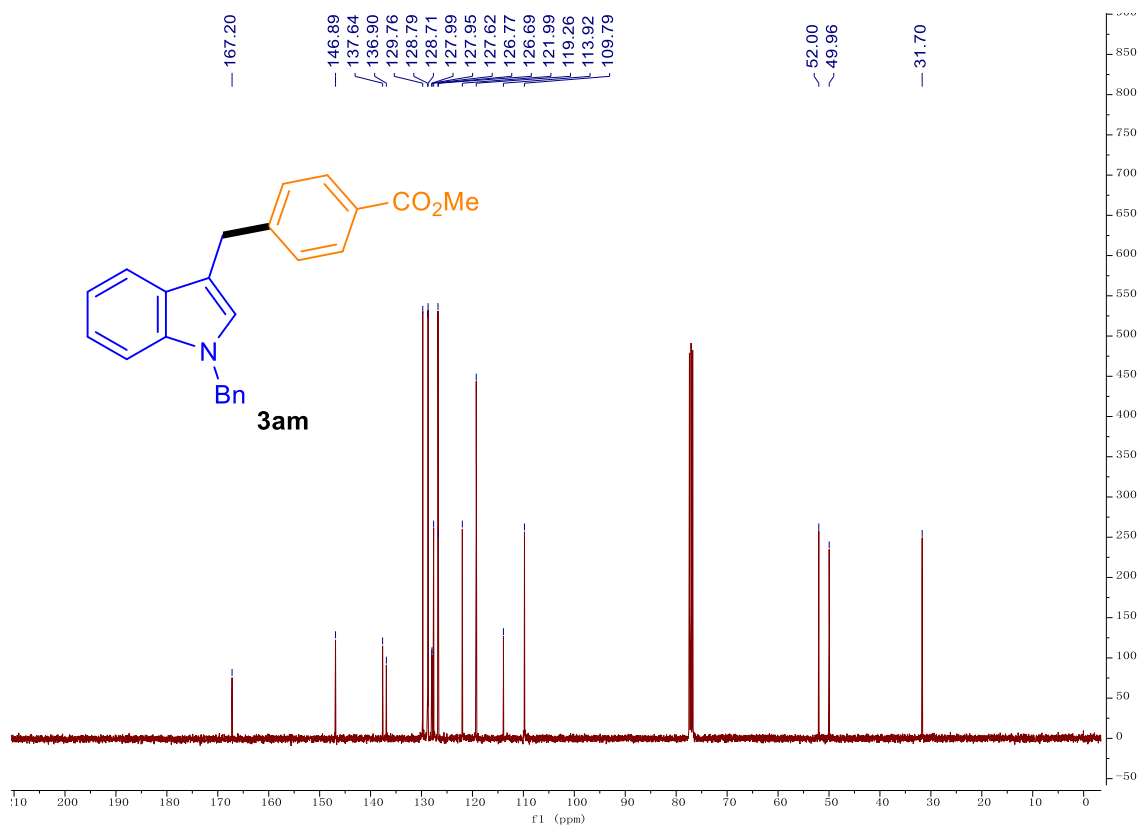

<sup>1</sup>H NMR (400 MHz) and <sup>13</sup>C{<sup>1</sup>H} NMR (100 MHz) spectra of **3am** (CDCl<sub>3</sub>, rt).



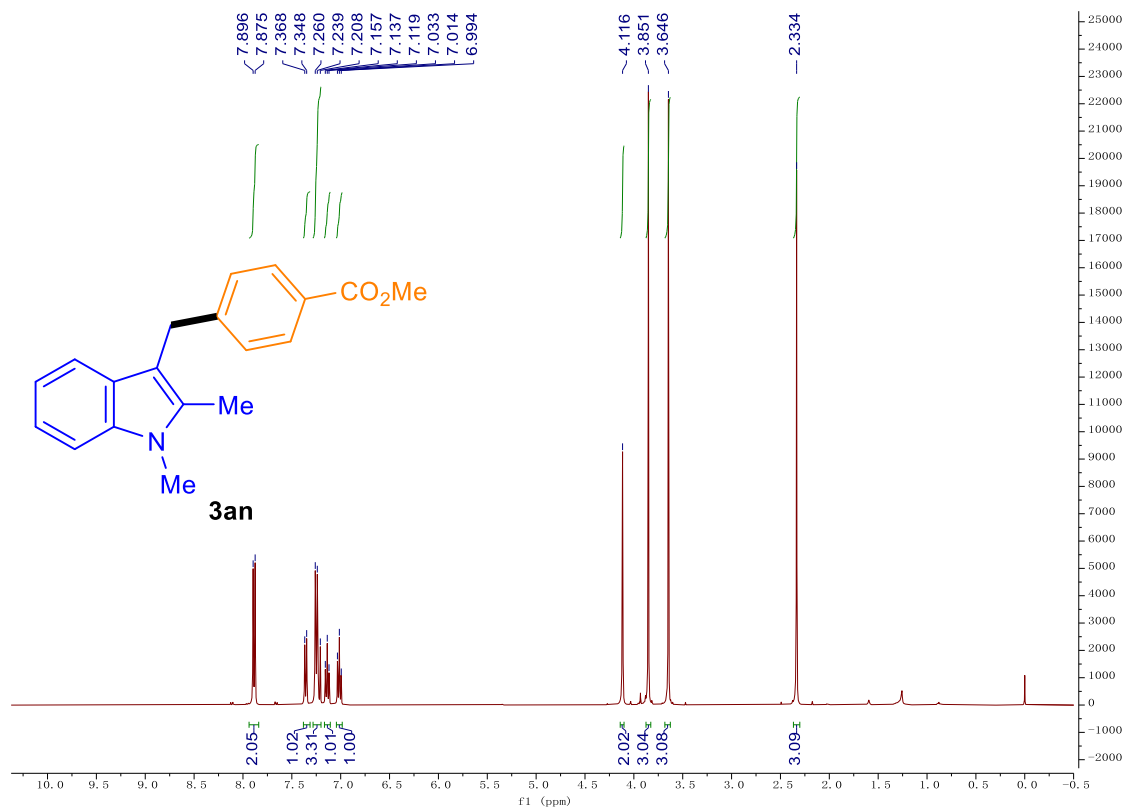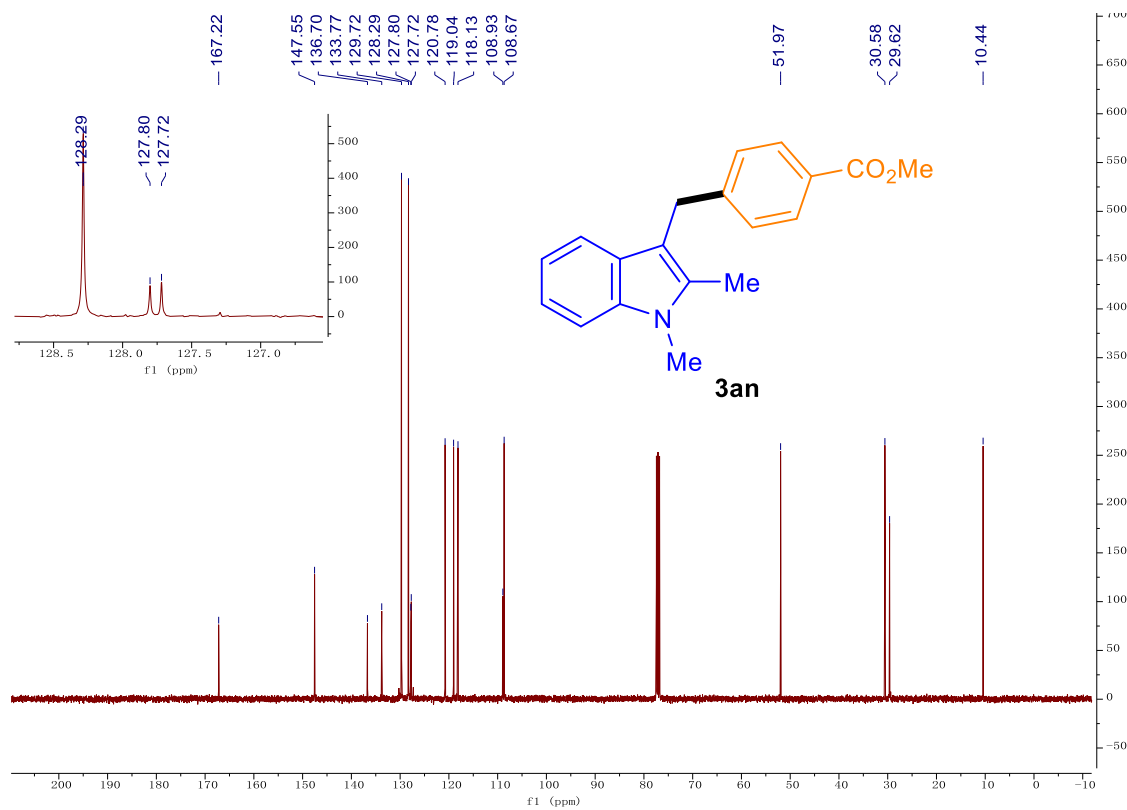

<sup>1</sup>H NMR (400 MHz) and <sup>13</sup>C{<sup>1</sup>H} NMR (100 MHz) spectra of **3an** (CDCl<sub>3</sub>, rt).

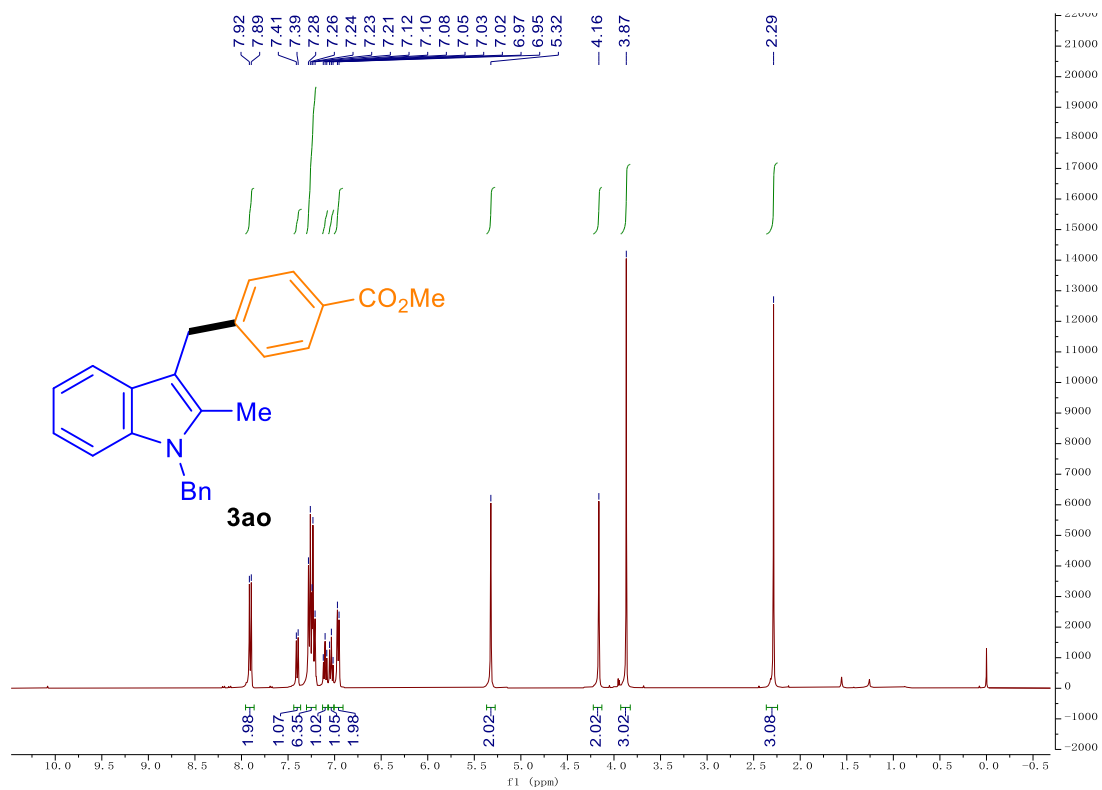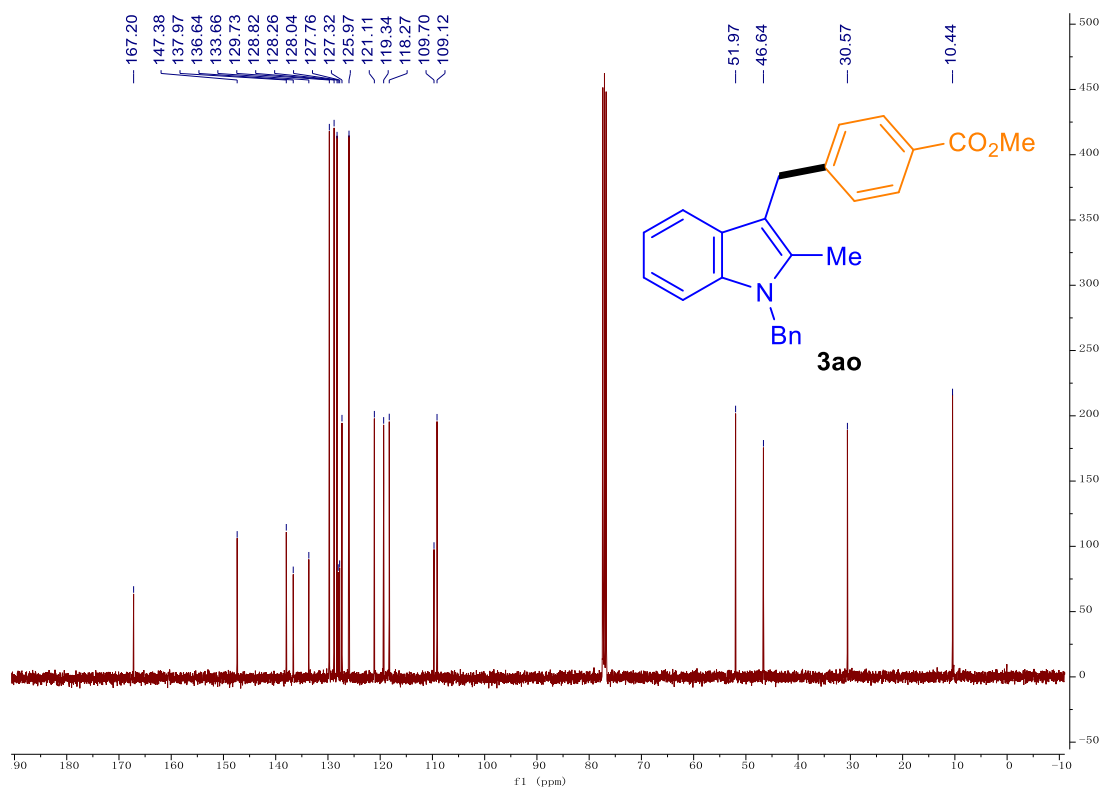

<sup>1</sup>H NMR (400 MHz) and <sup>13</sup>C{<sup>1</sup>H} NMR (100 MHz) spectra of 3ao (CDCl<sub>3</sub>, rt).

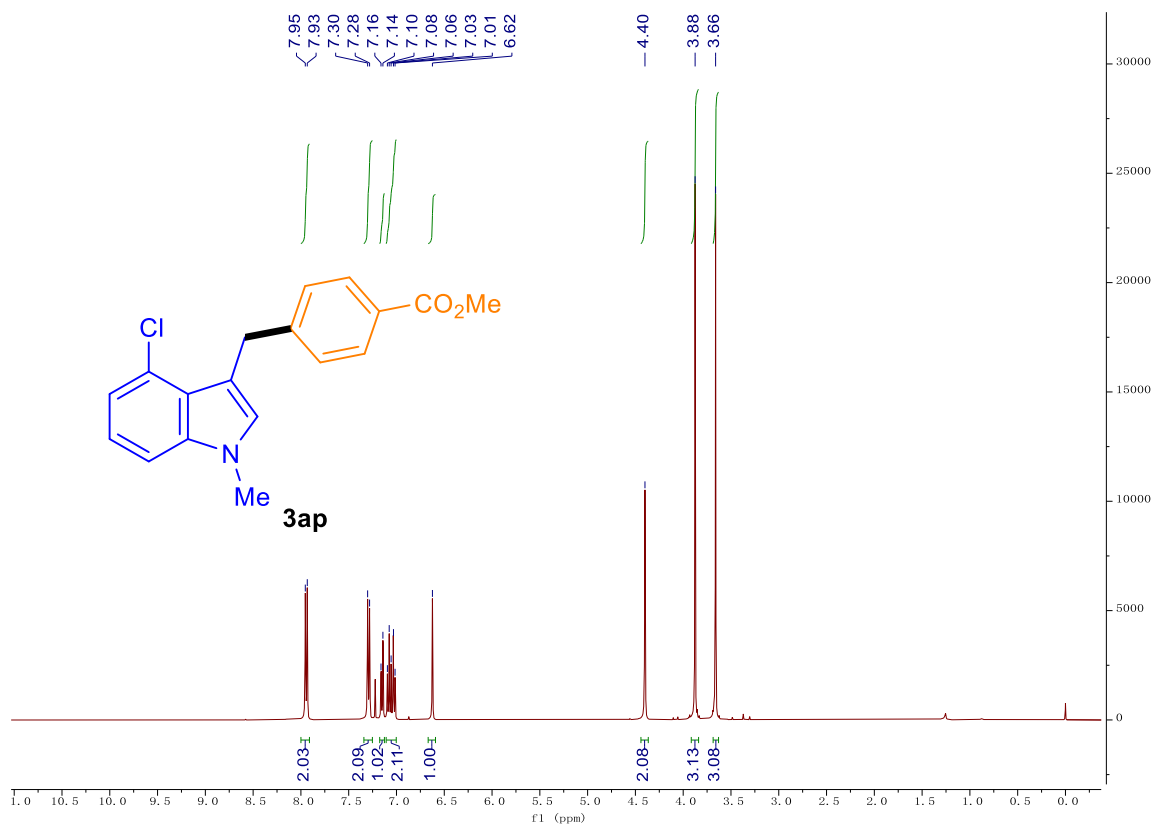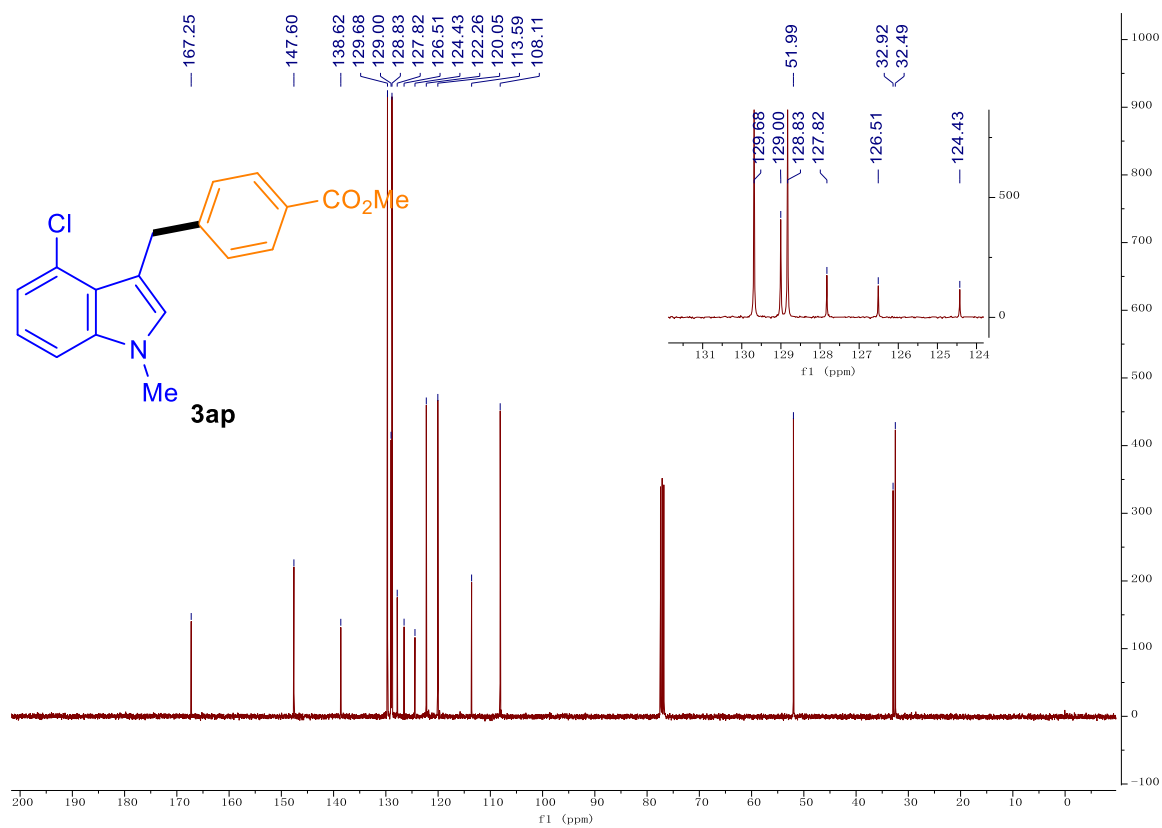

<sup>1</sup>H NMR (400 MHz) and <sup>13</sup>C{<sup>1</sup>H} NMR (100 MHz) spectra of **3ap** (CDCl<sub>3</sub>, rt).

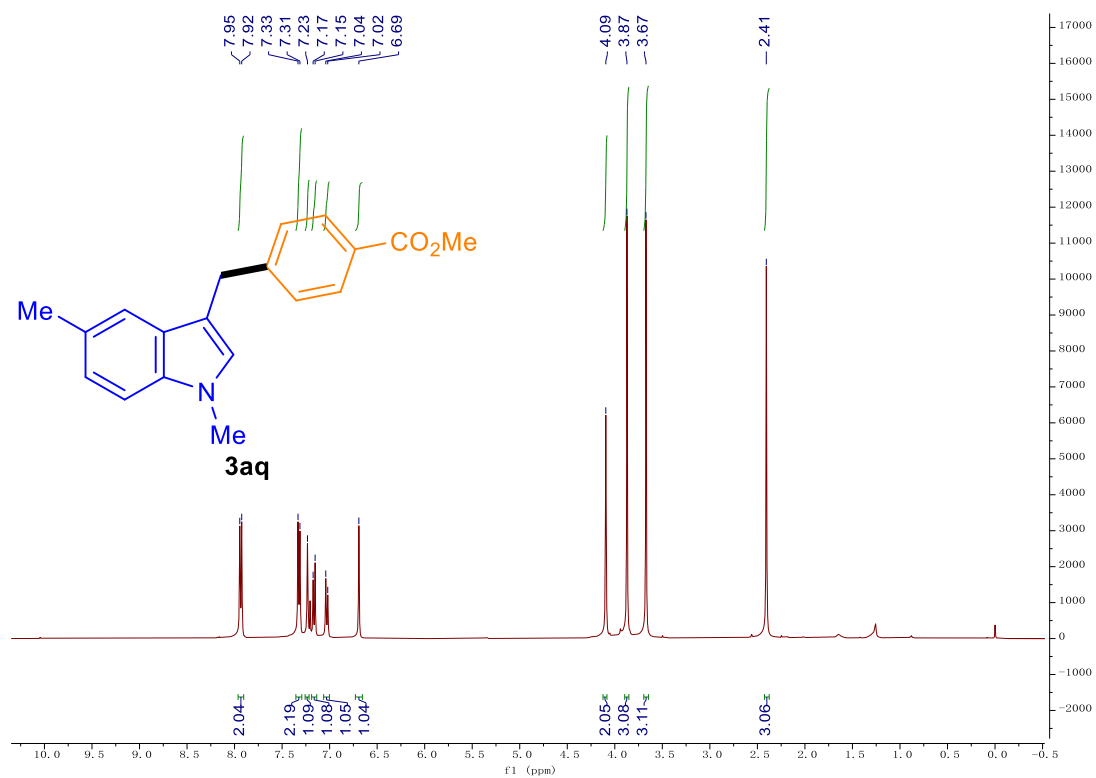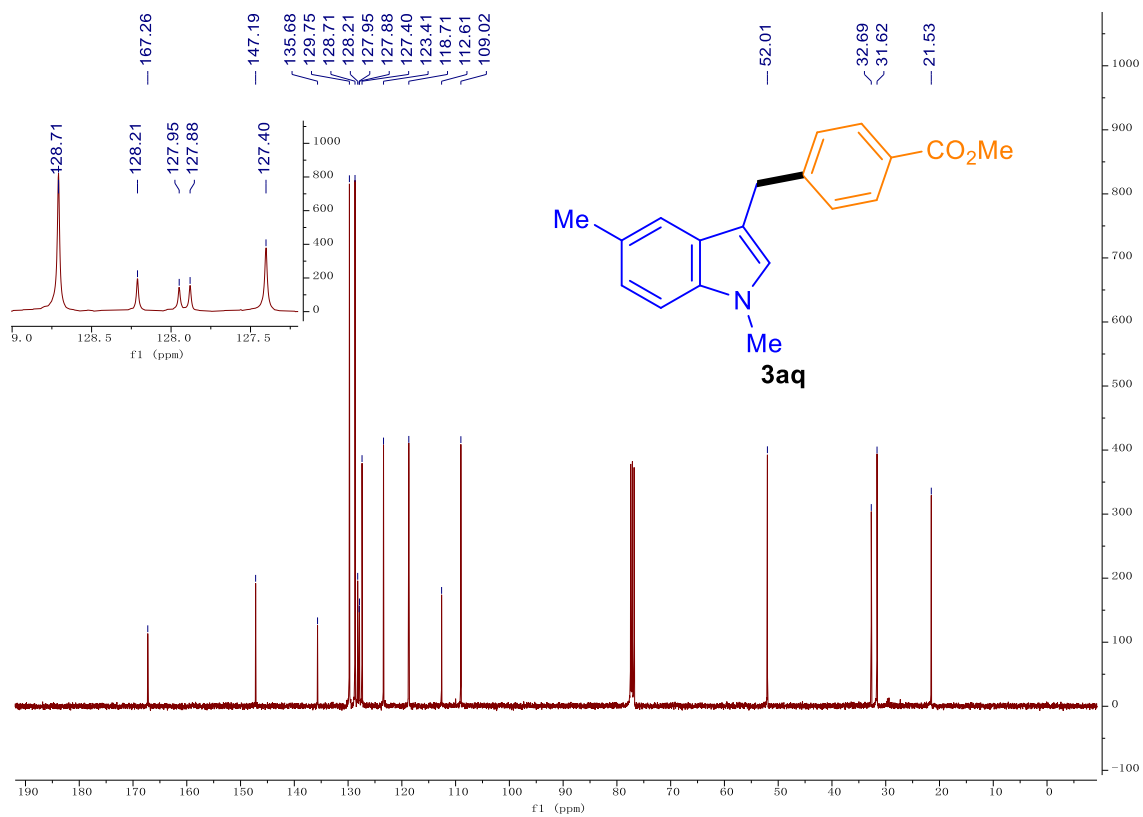

<sup>1</sup>H NMR (400 MHz) and <sup>13</sup>C{<sup>1</sup>H} NMR (100 MHz) spectra of **3aq** (CDCl<sub>3</sub>, rt).

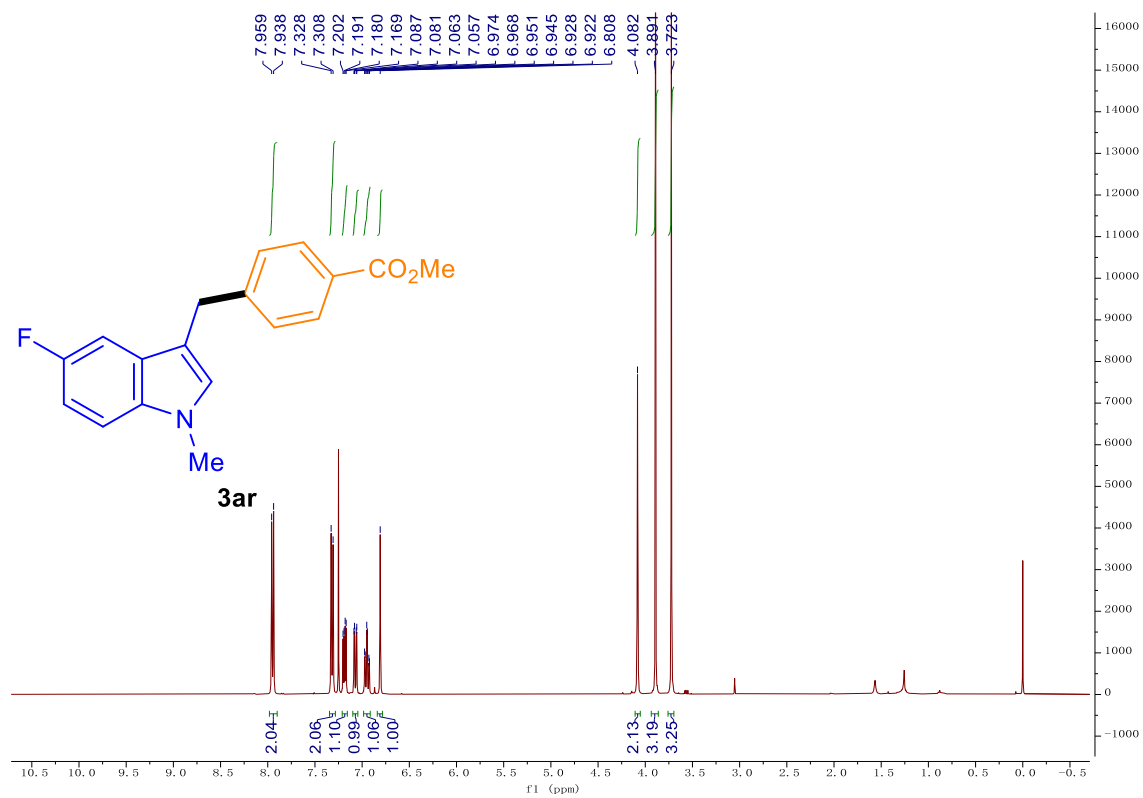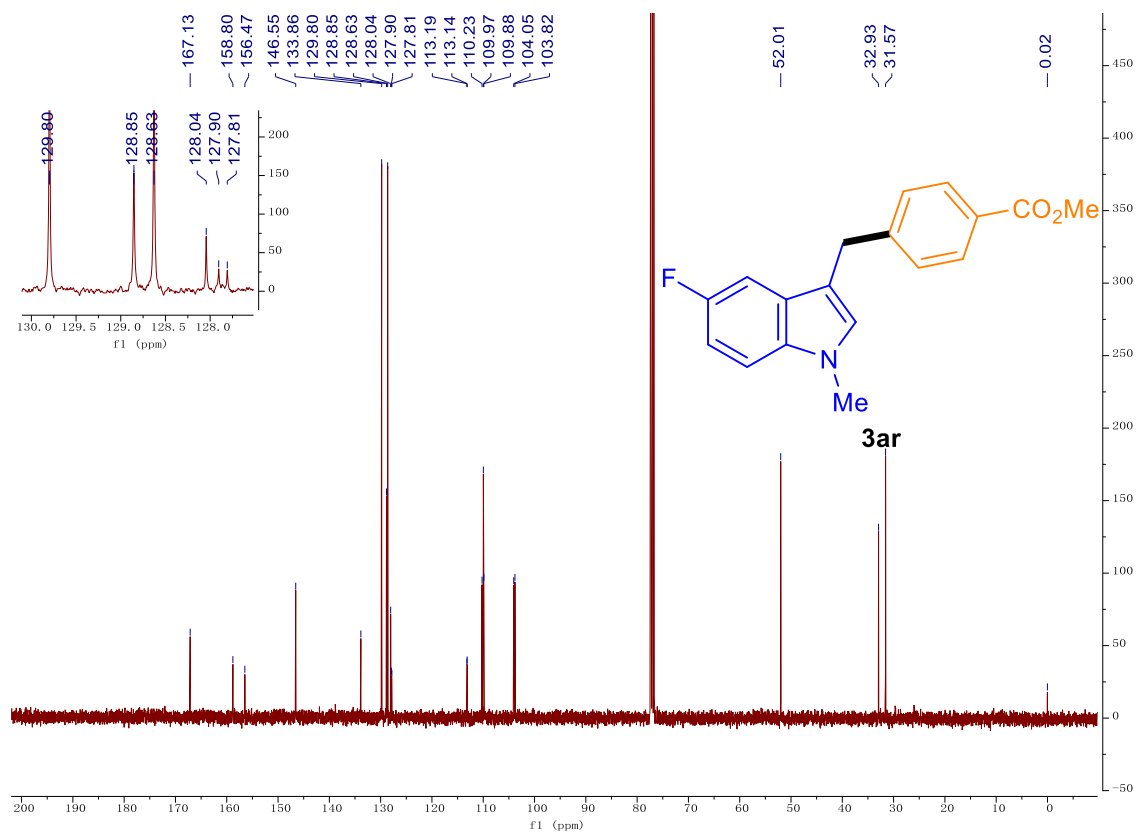

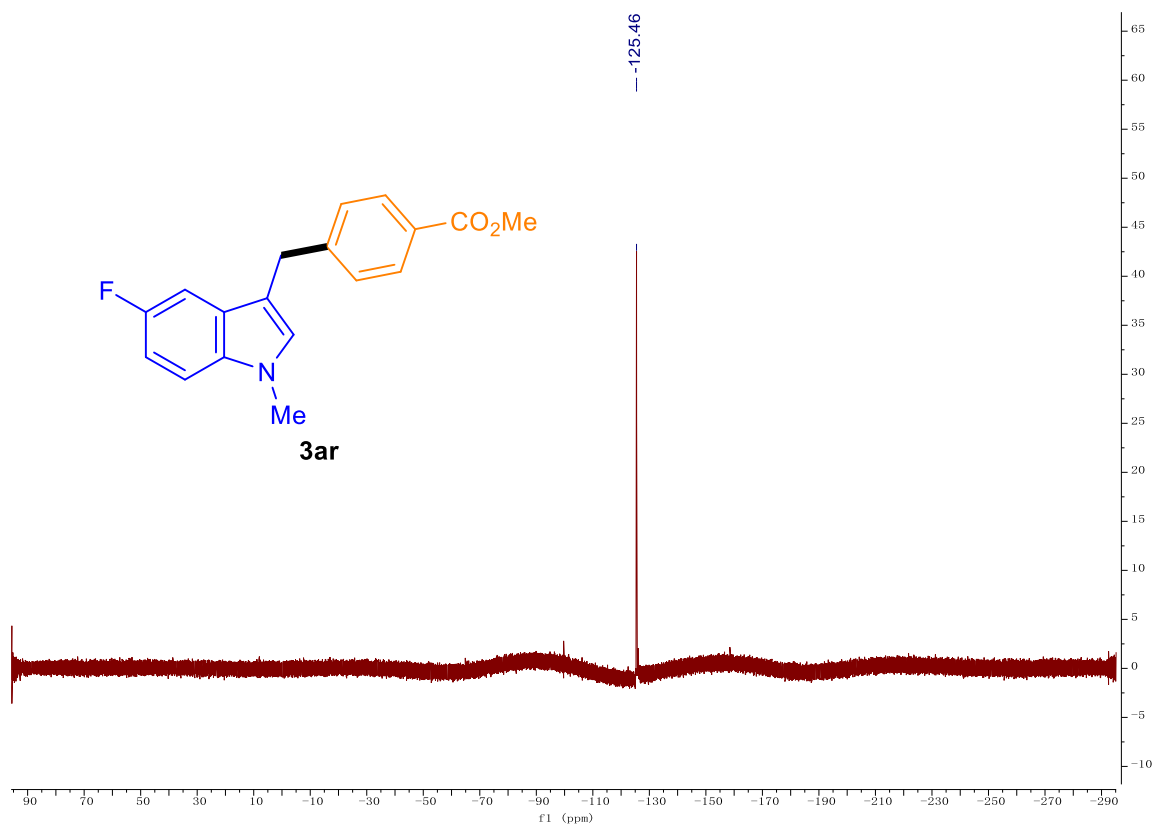

$^1\text{H}$  NMR (400 MHz),  $^{13}\text{C}\{^1\text{H}\}$  NMR (100 MHz) and  $^{19}\text{F}$  NMR (376 MHz) spectra of **3ar** (CDCl<sub>3</sub>,

---

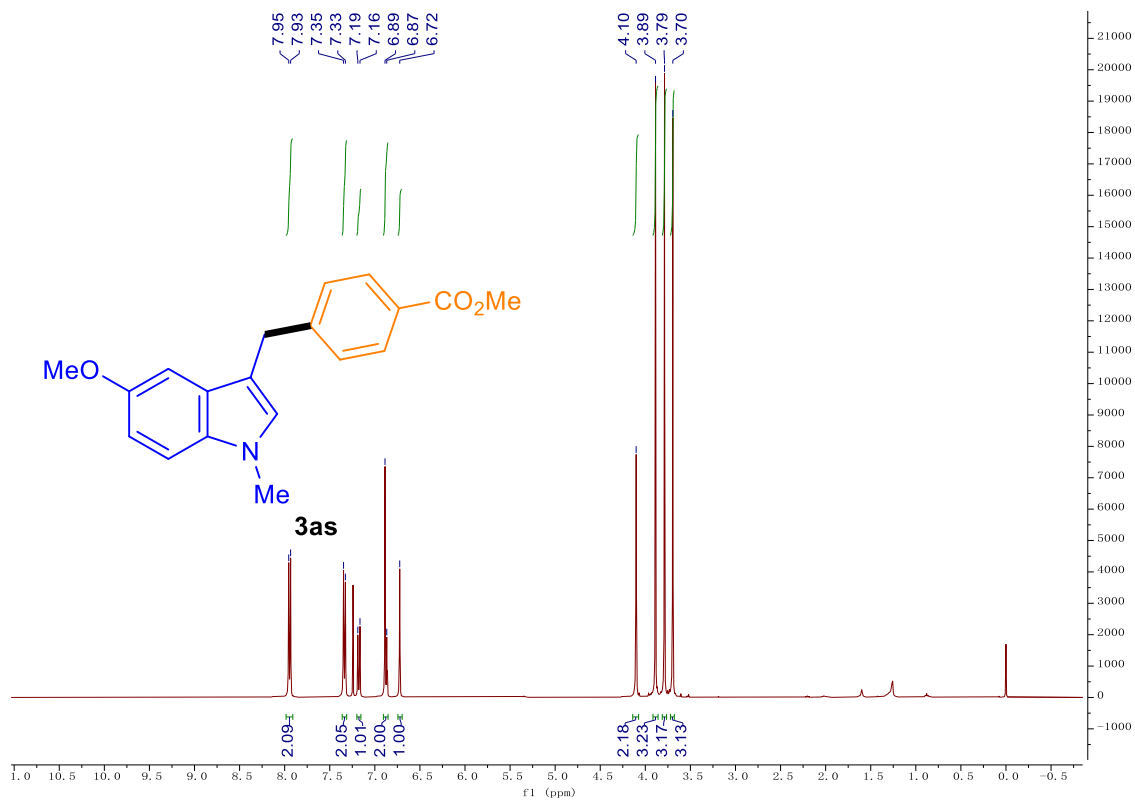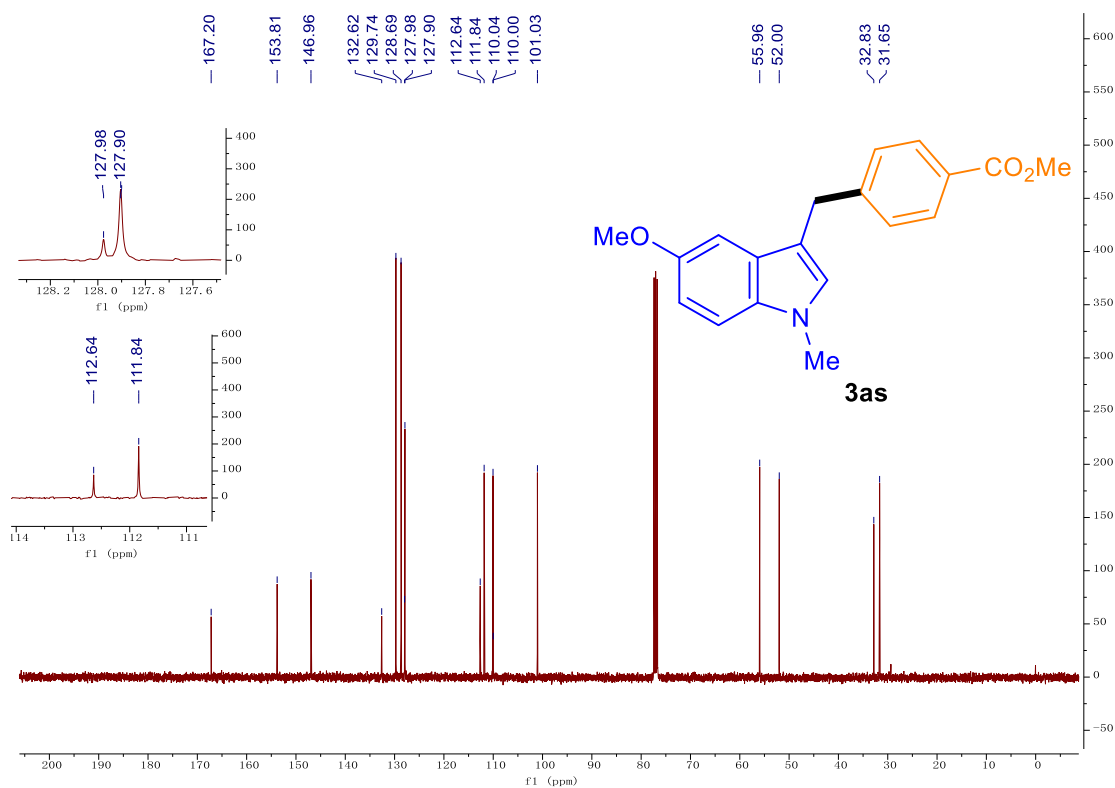

<sup>1</sup>H NMR (400 MHz) and <sup>13</sup>C{<sup>1</sup>H} NMR (100 MHz) spectra of **3as** (CDCl<sub>3</sub>, rt).

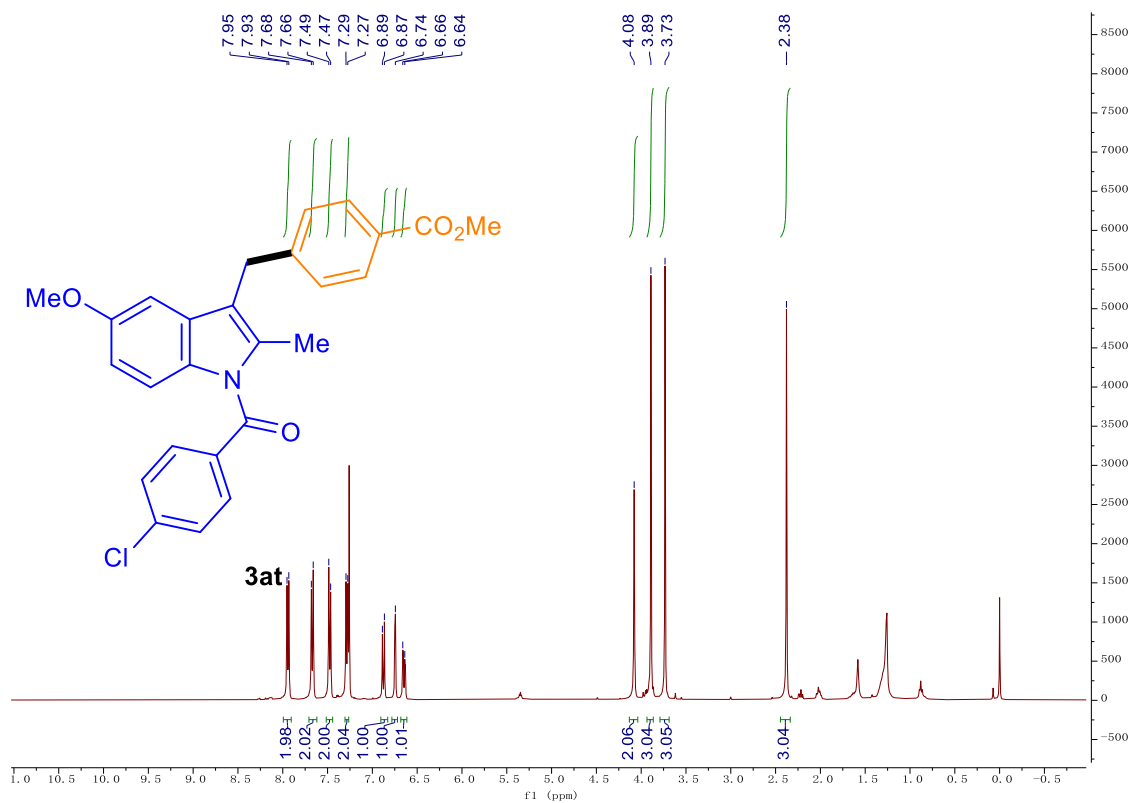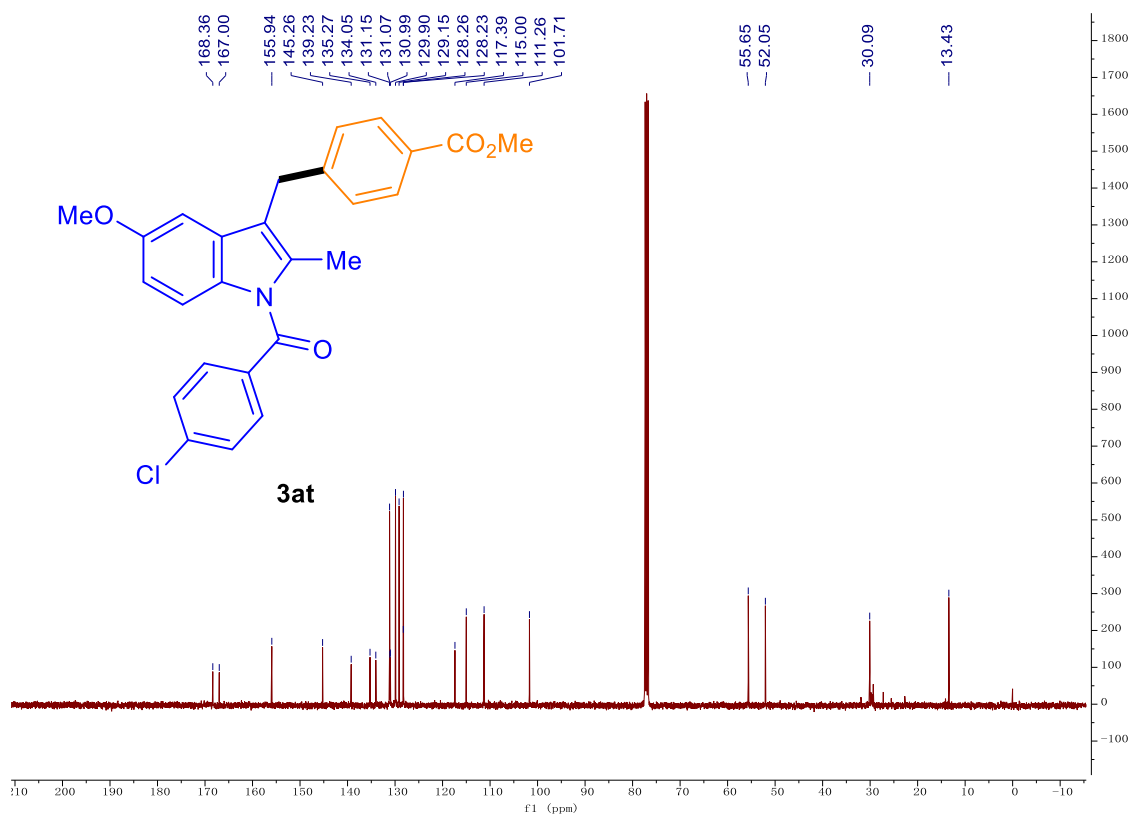

<sup>1</sup>H NMR (400 MHz) and <sup>13</sup>C{<sup>1</sup>H} NMR (100 MHz) spectra of **3at** (CDCl<sub>3</sub>, rt).
